# Supplementary material for: Importance of dipole moments and ambient polarity for the conformation of Xaa–Pro moieties – a combined experimental and theoretical study
Source: PubMed Central journal article supplement (PMC6090429; doi:10.1039/c5sc02211h), 2015-08-12
Supplement: SC-006-C5SC02211H-s001.pdf [file SC-006-C5SC02211H-s001.pdf]

## Importance of Dipole Moments and Ambient Polarity for the Conformation of Xaa-Pro Moieties – A Combined Experimental and Theoretical Study

Christiane Siebler,<sup>a</sup> Boris Maryasin,<sup>b</sup> Michael Kümin,<sup>a</sup> Roman S. Erdmann,<sup>a</sup> Carla Rigling,<sup>a</sup> Claudio Grünenfelder,<sup>a</sup> Christian Ochsenfeld\*<sup>b</sup> and Helma Wennemers\*<sup>a</sup>

<sup>a</sup> Laboratory of Organic Chemistry, D-CHAB, ETH Zurich,

Vladimir-Prelog-Weg 3

8093 Zurich, Switzerland

Email: [helma.wennemers@org.chem.ethz.ch](mailto:helma.wennemers@org.chem.ethz.ch)

<sup>b</sup> Chair of Theoretical Chemistry, Department of Chemistry, University of Munich (LMU),

Butenandtstr. 7, D-81377 Munich, and Center of Integrated Protein Science (CIPSM) at the

Department of Chemistry, University of Munich (LMU), Butenandtstr. 5-13, D-81377 Munich

Email: [christian.ochsenfeld@cup.uni-muenchen.de](mailto:christian.ochsenfeld@cup.uni-muenchen.de)

## Table of contents

|                                                                                                                                                                      |    |
|----------------------------------------------------------------------------------------------------------------------------------------------------------------------|----|
| 1. General aspects.....                                                                                                                                              | 3  |
| 2. Synthesis and Analytical Data of Proline Derivatives.....                                                                                                         | 4  |
| 2.1. Ac-Pro-OMe ( <b>1-OMe</b> ).....                                                                                                                                | 4  |
| 2.2. Ac-Pro-NMe <sub>2</sub> ( <b>1-NMe<sub>2</sub></b> ).....                                                                                                       | 6  |
| 2.3. Ac-(4 <i>R</i> )Flp-OMe ( <b>2R-OMe</b> ).....                                                                                                                  | 10 |
| 2.4. Ac-(4 <i>R</i> )Flp-NMe <sub>2</sub> ( <b>2R-NMe<sub>2</sub></b> ).....                                                                                         | 12 |
| 2.5. Ac-(4 <i>R</i> )Azp-NMe <sub>2</sub> ( <b>3R-NMe<sub>2</sub></b> ).....                                                                                         | 16 |
| 2.6. Ac-(4 <i>S</i> )Flp-OMe ( <b>2S-OMe</b> ).....                                                                                                                  | 18 |
| 2.7. Ac-(4 <i>S</i> )Flp-NMe <sub>2</sub> ( <b>2S-NMe<sub>2</sub></b> ).....                                                                                         | 19 |
| 2.8. Ac-(4 <i>S</i> )Azp-NMe <sub>2</sub> ( <b>3S-NMe<sub>2</sub></b> ).....                                                                                         | 23 |
| 2.9. H-Pro-Pro-Asp-NH <sub>2</sub> ·TFA ( <b>4</b> ).....                                                                                                            | 25 |
| 3. Quantum Chemical Calculations of Methylsters and Dimethylamides of Proline Derivatives.....                                                                       | 27 |
| 3.1. Gibbs free energies and dipole moments of Ac-Pro-OMe ( <b>1-OMe</b> ) and Ac-Pro-NMe <sub>2</sub> ( <b>1-NMe<sub>2</sub></b> ).....                             | 27 |
| 3.2. Indicators for the $n \rightarrow \pi^*$ Interaction in Ac-Pro-OMe ( <b>1-OMe</b> ) and Ac-Pro-OMe ( <b>1-NMe<sub>2</sub></b> ).....                            | 28 |
| 3.3. Gibbs free energies and dipole moments of Ac-(4 <i>R</i> )Flp-OMe ( <b>2R-OMe</b> ) and Ac-(4 <i>R</i> )Flp-NMe <sub>2</sub> ( <b>2R-NMe<sub>2</sub></b> )..... | 29 |
| 3.4. Gibbs free energies and dipole moments of Ac-(4 <i>R</i> )Azp-OMe ( <b>3R-OMe</b> ) and Ac-(4 <i>R</i> )Azp-NMe <sub>2</sub> ( <b>3R-NMe<sub>2</sub></b> )..... | 30 |
| 3.5. Gibbs free energies and dipole moments of Ac-(4 <i>S</i> )Flp-OMe ( <b>2S-OMe</b> ) and Ac-(4 <i>S</i> )Flp-NMe <sub>2</sub> ( <b>2S-NMe<sub>2</sub></b> )..... | 35 |
| 3.6. Gibbs free energies and dipole moments of Ac-(4 <i>S</i> )Azp-OMe ( <b>3S-OMe</b> ) and Ac-(4 <i>S</i> )Azp-NMe <sub>2</sub> ( <b>3S-NMe<sub>2</sub></b> )..... | 36 |
| 4. Cartesian Coordinates.....                                                                                                                                        | 41 |
| 5. Torsion Potential of Methylsters and Dimethylamides of Proline Derivatives.....                                                                                   | 69 |
| 6. NMR Spectra.....                                                                                                                                                  | 77 |
| 7. References.....                                                                                                                                                   | 99 |

## 1. General aspects

Materials and reagents were of the highest commercially available grade and used without further purification. For solid phase peptide syntheses Rink Amide-ChemMatrix resin from Biotage was used. Reactions were monitored by thin layer chromatography using Merck silica gel 60 F254 plates. Compounds were visualized by UV and ninhydrin. Flash chromatography was performed using Merck silica gel 60, particle size 40 - 63  $\mu\text{m}$  and Fluka silica gel 60 Å, 230-400 mesh particle size.  $^1\text{H}$  and  $^{13}\text{C}$  NMR spectra were recorded on Bruker DPX 400, Bruker AV 400 MHz and Bruker AVIII 600 MHz spectrometers. Chemical shifts are reported in ppm using TMS or the residual solvent peak as a reference. A Bruker Esquire 3000plus and a Bruker Amazon Speed instrument were used for electrospray ionization (ESI) mass spectrometry measurements. A Bruker microflex instrument was used for Maldi-MS analysis with  $\alpha$ -Cyano-4-hydroxycinnamic acid (CHCA) as MALDI-MS Matrix. Analytical HPLC was performed using a LiChrospher 100 RP-18e 5  $\mu\text{m}$  (250 mm x 4 mm) column from Merck. Preparative HPLC was carried out on a LiChrospher RP-18e 5  $\mu\text{m}$  (250 mm x 10 mm) column from Merck. A Chirascan Plus (Applied Biophysics Ltd, Leatherhead, UK) was used for CD measurements. The solutions were measured in a quartz cell with a pathlength of 1.0 mm (Hellma 110-QS). For automated peptide synthesis, a Syro I Peptide Synthesizer (MultiSynTech GmbH, Witten, Germany) was employed.

## 2. Synthesis and Analytical Data of Proline Derivatives

### 2.1. Ac-Pro-OMe (1-OMe)

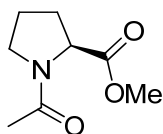

The compound was purchased from Bachem. The analytical data are in agreement with published data.<sup>[1]</sup>

**<sup>1</sup>H NMR** (400 MHz, Deuterium Oxide); *trans* conformer  $\delta$  / ppm = 4.46 (dd,  $J$  = 8.6, 4.3 Hz, 1H; H $\alpha$ ), , 3.77 (s, 3H; OMe), 3.73 – 3.60 (m, 2H; H $\delta$ ), 2.37 – 2.25 (m, 1H; H $\beta$ ), 2.13 (s, 3H; Ac), 2.09 – 1.96 (m, 2H; H $\beta$ , H $\gamma$ ). Isolated signals of the *cis* conformer  $\delta$  / ppm = 4.72 (dd,  $J$  = 8.8, 2.7 Hz, 1H; H $\alpha$ , overlapping with water), 3.82 (s, 3H; OMe), 3.60 – 3.44 (m, 1H; H $\delta$ ).

**<sup>13</sup>C NMR** (101 MHz, Deuterium Oxide)  $\delta$  / ppm = 175.0 (carbonyl), 173.0 (carbonyl), 59.0 (C $\alpha$ ), 52.9 (OMe), 48.4 (C $\delta$ ), 29.2 (C $\beta$ ), 24.2 (C $\gamma$ ), 21.2 (Ac). Isolated signals of the *cis* conformer  $\delta$  / ppm = 174.6, 60.7, 53.2, 46.6, 30.6, 22.3.

**K<sub>trans/cis</sub>** (400 MHz, Deuterium Oxide) = 4.6

**<sup>1</sup>H NMR** (400 MHz, DMSO-*d*<sub>6</sub>); *trans* conformer  $\delta$  / ppm = 4.25 (dd,  $J$  = 8.7, 4.2 Hz, 1H; H $\alpha$ ), 3.60 (s, 3H; OMe), 3.58 – 3.46 (2 x d $\nu$ rt,  $J$  = 9.9, 6.8 Hz, 2H; H $\delta$ ), 2.20 – 2.10 (m,  $J$  = 12.2, 8.6, 7.4 Hz, 2H; H $\beta$ ), 1.97 (s, 3H; Ac), 1.95 – 1.86 (m,  $J$  = 7.1, 6.4 Hz, 2H; H $\gamma$ ), 1.86 – 1.78 (m,  $J$  = 11.9, 4.4 Hz, 1H; H $\beta$ ). Isolated signals of the *cis* conformer  $\delta$  / ppm = 4.60 (dd,  $J$  = 8.7, 2.6 Hz, 1H; H $\alpha$ ), 3.69 (s, 3H; OMe), 3.36 (dd,  $J$  = 8.5, 5.6 Hz, 2H; H $\delta$ ), 2.26 – 2.19 (m,  $J$  = 8.7, 3.8, 1.8 Hz, 1H; H $\beta$ ), 2.04 (dddd,  $J$  = 12.9, 6.8, 3.5, 2.6 Hz, 1H; H $\beta$ ), 1.84 (s, 3H; Ac), 1.77 – 1.67 (m, 2H; H $\gamma$ ).

**<sup>13</sup>C NMR** (101 MHz, DMSO-*d*<sub>6</sub>); *trans* conformer  $\delta$  / ppm = 172.55 (carbonyl), 168.32 (carbonyl), 58.01 (C $\alpha$ ), 51.70 (OMe), 47.22 (C $\delta$ ), 29.01 (C $\beta$ ), 24.40 (C $\gamma$ ), 22.03 (Ac).

Isolated signals of the *cis* conformer  $\delta$  / ppm = 172.77 (carbonyl), 168.48 (carbonyl), 59.21 (C $\alpha$ ), 52.33 (OMe), 45.77 (C $\delta$ ), 30.76(C $\beta$ ), 22.37 (C $\gamma$ ).

**K<sub>trans/cis</sub>** (400 MHz, DMSO-*d*<sub>6</sub>) = 3.6

**<sup>1</sup>H NMR** (400 MHz, Chloroform-*d*); *trans* conformer  $\delta$  / ppm = 4.48 (dd,  $J$  = 8.7, 3.8 Hz, 1H; H $\alpha$ ), 3.72 (s, 3H; OMe), 3.69 – 3.45 (m, 2H; H $\delta$ ), 2.35 – 1.86 (m, 4H; H $\beta$ , H $\gamma$ ), 2.09 (s, 3H; Ac). Isolated signals of the *cis* conformer  $\delta$  / ppm = 4.37 (dd,  $J$  = 8.6, 2.8 Hz, 1H; H $\alpha$ ), 3.76 (s, 3H; OMe), 1.97 (s, 3H; Ac).

**<sup>13</sup>C NMR** (101 MHz, CDCl<sub>3</sub>); *trans* conformer  $\delta$  / ppm = 173.0 (carbonyl), 169.6 (carbonyl), 58.6 (C $\alpha$ ), 52.3 (OMe), 47.8 (C $\delta$ ), 29.6 (C $\beta$ ), 24.9 (C $\gamma$ ), 22.4 (Ac). Isolated signals of the *cis* conformer  $\delta$  / ppm = 60.3 (C $\alpha$ ), 52.7 (OMe), 46.4 (C $\delta$ ), 31.6 (C $\beta$ ), 22.9 (C $\gamma$ ), 22.4 (Ac).

**K<sub>trans/cis</sub>** (400 MHz, Chloroform-*d*) = 3.9

**<sup>1</sup>H NMR** (400 MHz, 1,4-Dioxane-d8); *trans* conformer  $\delta$  / ppm = 4.33 (dd,  $J$  = 8.6, 3.8 Hz, 1H; H $\alpha$ ), 3.62 (s, 3H; OMe), 3.61 – 3.40 (m, 2H; H $\delta$ ), 2.27 – 1.77 (m, 4H; H $\beta$ , H $\gamma$ ), 1.95 (s, 3H; Ac). Isolated signals of the *cis* conformer  $\delta$  / ppm = 4.39 (dd,  $J$  = 8.6, 2.7 Hz, 1H; H $\alpha$ ), 3.70 (s, 3H; OMe), 1.84 (s, 3H; Ac).

**<sup>13</sup>C NMR** (101 MHz, 1,4-Dioxane-d8); *trans* conformer  $\delta$  / ppm = 173.4 (carbonyl), 168.7 (carbonyl), 59.0 (C $\alpha$ ), 52.0 (OMe), 48.0 (C $\delta$ ), 30.0 (C $\beta$ ), 25.5 (C $\alpha$ ), 22.0 (Ac). Isolated signals of the *cis* conformer  $\delta$  / ppm = 60.6 (C $\alpha$ ), 52.5 (OMe), 46.6 (C $\delta$ ), 32.0 (C $\beta$ ), 23.4 (C $\gamma$ ), 22.0 (Ac).

**K<sub>trans/cis</sub>** (400 MHz, 1,4-Dioxane-d8) = 3.9

## 2.2. Ac-Pro-NMe<sub>2</sub> (1-NMe<sub>2</sub>)

### Boc-Pro-NMe<sub>2</sub>

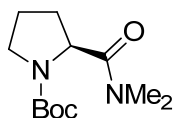

Boc-Pro-OH (500 mg, 2.32 mmol, 1.0 eq) was dissolved in CH<sub>2</sub>Cl<sub>2</sub> (9.3 ml) and EDC·HCl (490 mg, 2.56 mmol, 1.1 eq), *i*Pr<sub>2</sub>NEt (514 μL, 3.02 mmol, 1.3 eq) and HNMe<sub>2</sub>·HCl (243 mg, 3.02 mmol, 1.3 eq) were added. The solution was stirred overnight and diluted with CH<sub>2</sub>Cl<sub>2</sub> (50 ml) and washed with HCl (1M, 3 x 15 ml) and sat. NaHCO<sub>3</sub> (3 x 15 ml). The organic layer was dried over MgSO<sub>4</sub> and concentrated under reduced pressure. The residue was subjected to flash chromatography on silica (5% MeOH in CH<sub>2</sub>Cl<sub>2</sub>) to obtain the title compound (337 mg, 60%) as a colorless oil.

**TLC** R<sub>f</sub> = 0.36 (silica, 5% MeOH in CH<sub>2</sub>Cl<sub>2</sub>, ninhydrin).

(two isomers are visible in the <sup>1</sup>H NMR- and <sup>13</sup>C NMR-spectra in a ratio of ≈ 1.2:1 in CDCl<sub>3</sub>).

**<sup>1</sup>H NMR** (400 MHz, CDCl<sub>3</sub>) δ/ppm = 4.68 (dd, *J* = 8.3 Hz, 3.2 Hz, 1H; H<sub>α</sub>), 3.66-3.54 (m, 1H; H<sub>δ</sub>), 3.54-3.37 (m, 1H; H<sub>δ</sub>), 3.10 (s, 3H; NMe<sub>2</sub>), 2.97 (s, 3H; NMe<sub>2</sub>), 2.23-1.98 (m, 2H; H<sub>β</sub>), 1.92-1.79 (m, 2 H; H<sub>β</sub>), 1.47 (s, 9H). Isolated signals of the minor conformer: 4.55 (dd, *J* = 8.2 Hz, 4.3 Hz, 1H), 3.07 (s, 3H), 2.98 (s, 3H), 1.41 (s, 9H).

**<sup>13</sup>C NMR** (101 MHz, CDCl<sub>3</sub>) δ/ppm = 172.7 (amide), 154.9 (Boc), 79.8 (Boc), 56.7 (C<sub>α</sub>), 47.2 (C<sub>δ</sub>), 37.3 (NMe<sub>2</sub>), 36.3 (NMe<sub>2</sub>), 29.9 (C<sub>β</sub>), 28.9 (Boc), 24.6 (C<sub>γ</sub>). Isolated signals of the minor conformer: 174.1 (amide), 154.7 (Boc), 79.8 (Boc), 56.8 (C<sub>α</sub>), 47.0 (C<sub>δ</sub>), 37.3 (NMe<sub>2</sub>), 36.3 (NMe<sub>2</sub>), 30.7 (C<sub>β</sub>), 28.7 (Boc), 24.0 (C<sub>γ</sub>).

**ESI-MS:** *m/z* calcd for C<sub>12</sub>H<sub>22</sub>N<sub>2</sub>O<sub>3</sub>: 242.2; found: 265.3 [M+Na]<sup>+</sup> (100%).

## H-Pro-NMe<sub>2</sub>·TFA

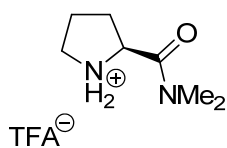

Boc-Pro-NMe<sub>2</sub> (337 mg, 1.39 mmol, 1.0 eq) was stirred in a 1:1 mixture of TFA and CH<sub>2</sub>Cl<sub>2</sub> (7 ml) for 3 hours. The solution was concentrated under reduced pressure to obtain the title compound (356 mg, quant.) as slightly yellowish oil.

**TLC** R<sub>f</sub> = 0.41 (silica, MeCN:H<sub>2</sub>O 4:1, ninhydrin).

**<sup>1</sup>H NMR** (400 MHz, CDCl<sub>3</sub>) δ/ppm = 10.41 (s, 1H, NH<sub>2</sub><sup>+</sup>), 7.66 (s, 1H; NH<sub>2</sub><sup>+</sup>), 4.92-4.81 (m, 1H; H<sub>α</sub>), 3.62-3.44 (m, 2H; H<sub>δ</sub>), 3.09 (s, 3H; NMe<sub>2</sub>), 3.05 (s, 3H; NMe<sub>2</sub>), 2.63-2.51 (m, 1H; H<sub>β</sub>), 2.25-2.14 (m, 1H; H<sub>β</sub>), 2.13-2.03 (m, 1H; H<sub>γ</sub>), 2.02-1.92 (m, 1H; H<sub>γ</sub>).

**<sup>13</sup>C NMR** (101 MHz, CDCl<sub>3</sub>) δ/ppm = 168.6 (amide), 58.7 (C<sub>α</sub>), 47.5 (C<sub>δ</sub>), 37.1 (NMe<sub>2</sub>), 36.7 (NMe<sub>2</sub>), 29.8 (C<sub>β</sub>), 25.2 (C<sub>γ</sub>).

**ESI-MS:** *m/z* calcd for C<sub>7</sub>H<sub>14</sub>N<sub>2</sub>O: 142.1; found: 143.1 [M+H]<sup>+</sup> (100%).

## Ac-Pro-NMe<sub>2</sub> (1-NMe<sub>2</sub>)

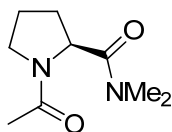

H-Pro-NMe<sub>2</sub>·TFA (356 mg, 1.39 mmol, 1.0 eq) was dissolved in 3.8 ml of CH<sub>2</sub>Cl<sub>2</sub> and Ac<sub>2</sub>O (263 μL, 2.78 mmol, 2.0 eq) and NEt<sub>3</sub> (391 μL, 2.78 mmol, 2.0 eq) were added. The solution was stirred overnight, diluted with CH<sub>2</sub>Cl<sub>2</sub> (15 ml), and washed with 1M HCl (3x 5 ml) and sat. NaHCO<sub>3</sub> (3 x 5 ml). The organic layer was dried under reduced pressure and the residue was subjected to flash chromatography (silica, 5% MeOH in CH<sub>2</sub>Cl<sub>2</sub>) to obtain the title compound (150 mg, 59%) as colorless oil.

The analytical data are in agreement with published data.<sup>[2]</sup>

**TLC** R<sub>f</sub> = 0.22 (silica, 5% MeOH in CH<sub>2</sub>Cl<sub>2</sub>, TDM).

**<sup>1</sup>H NMR** (400 MHz, Deuterium Oxide); *trans* conformer δ / ppm = 4.85 – 4.73 (H<sub>α</sub>, overlapping with DHO), 3.64 (t, *J* = 6.9 Hz, 2H; H<sub>δ</sub>), 3.12 (s, 3H; NMe), 2.92 (s, 3H; NMe), 2.32 (dddd, *J* = 12.6, 8.8, 7.9, 7.2 Hz, 1H; H<sub>β</sub>), 2.02 – 1.94 (m, 2H; H<sub>γ</sub>), 2.10 (s, Ac), 1.89 – 1.81 (m, 1H; H<sub>β</sub>). Isolated signals of the *cis* conformer δ / ppm = 4.99 (dd, *J* = 8.9, 3.3 Hz, 1H; H<sub>α</sub>), 3.53 (ddd, *J* = 8.0, 5.5, 2.0 Hz, 2H; H<sub>δ</sub>), 3.14 (s, 3H; NMe), 2.96 (s, 3H; NMe), 2.42 (dddd, *J* = 12.7, 9.8, 8.8, 7.1 Hz, 1H; H<sub>β</sub>), 1.90 (s, 3H; Ac).

**<sup>13</sup>C NMR** (101 MHz, Deuterium Oxide); *trans* conformer δ / ppm = 173.3 (carbonyl), 172.4 (carbonyl), 57.3 (C<sub>α</sub>), 48.8 (C<sub>δ</sub>), 36.9 (NMe), 35.7 (NMe), 28.7 (C<sub>β</sub>), 24.1 (C<sub>γ</sub>), 21.2 (Ac). Isolated signals of the *cis* conformer δ / ppm = 59.2 (C<sub>α</sub>), 47.2 (C<sub>δ</sub>), 36.8 (NMe), 35.9 (NMe), 30.3 (C<sub>β</sub>), 22.4 (C<sub>γ</sub>), 21.0 (Ac).

**K<sub>trans/cis</sub>** (400 MHz, Deuterium Oxide) = 3.8

**<sup>1</sup>H NMR** (400 MHz, DMSO-d<sub>6</sub>); *trans* conformer δ / ppm = 4.69 (dd, *J* = 8.6, 3.7 Hz, 1H; H<sub>α</sub>), 3.54 – 3.45 (m, 2H; H<sub>δ</sub>), 3.01 (s, 3H; NMe), 2.79 (s, 3H; NMe), 2.10 (dψtd, *J* = 12.3, 8.6, 7.6 Hz, 1H; H<sub>β</sub>), 1.93 (s, 3H; Ac), 1.95 – 1.83 (m, *J* = 16.1, 6.9 Hz, 2H; H<sub>γ</sub>), 1.75 – 1.67 (m, 1H; H<sub>β</sub>). Isolated signals of the *cis* conformer δ / ppm = 4.86 (dd, *J* = 8.7, 3.0 Hz, 1H; H<sub>α</sub>), 3.03 (s, 3H; NMe), 2.84 (s, 3H; NMe), 2.25 (dddd, *J* = 12.3, 9.5, 8.7, 7.4 Hz, 1H; H<sub>β</sub>), 1.88 – 1.81 (m, 1H; H<sub>β</sub>), 1.79 – 1.70 (m, 2H; H<sub>γ</sub>), 1.73 (s, 3H; Ac).

**<sup>13</sup>C NMR** (101 MHz, DMSO-d<sub>6</sub>); *trans* conformer δ / ppm = 171.18 (carbonyl), 167.70 (carbonyl), 55.78 (C<sub>α</sub>), 47.49 (C<sub>δ</sub>), 36.48 (NMe), 35.18 (NMe), 28.60 (C<sub>β</sub>), 24.16 (C<sub>γ</sub>), 22.20 (Ac). Isolated signals of the *cis* conformer δ / ppm = 171.10 (carbonyl), 168.33 (carbonyl), 57.61 (C<sub>α</sub>), 46.19 (C<sub>δ</sub>), 36.34 (NMe), 35.40 (NMe), 30.38 (C<sub>β</sub>), 22.29 (C<sub>γ</sub>), 21.96 (Ac).

**K<sub>trans/cis</sub>** (400 MHz, DMSO-d, H<sub>α</sub>) = 2.0



**<sup>1</sup>H NMR** (400 MHz, CDCl<sub>3</sub>) δ/ppm = 4.86 (dd, *J* = 8.2 Hz, 3.6 Hz, 1H; H $\alpha$ ), 3.73 (ddd, *J* = 9.5 Hz, 8.0 Hz, 5.0 Hz, 1H; H $\delta$ ), 3.53 (dt, *J* = 9.7 Hz, 7.2 Hz, 1H; H $\delta$ ), 3.14 (s, 3H; NMe<sub>2</sub>), 2.97 (s, 3H; NMe<sub>2</sub>), 2.26-2.10 (m, 2H; H $\beta$ ), 2.10 (s, 3H; Ac), 2.02-1.81 (m, 2H; H $\gamma$ ). Isolated signals of the minor conformer: 4.63 (dd, *J* = 8.6 Hz, 2.6 Hz, 1H; H $\alpha$ ), 3.10 (s, 3H; NMe<sub>2</sub>), 3.01 (s, 3H; NMe<sub>2</sub>), 1.91 (s, 3H; Ac).

**<sup>13</sup>C NMR** (101 MHz, CDCl<sub>3</sub>) δ/ppm = 172.3, (carbonyl), 172.1, (carbonyl), 57.0 (C $\alpha$ ), 48.6, (C $\delta$ ), 37.7 (NMe<sub>2</sub>), 36.7 (NMe<sub>2</sub>), 29.1 (C $\beta$ ), 24.8 (C $\gamma$ ), 21.4 (Ac).

**K<sub>trans/cis</sub>** (400 MHz, Chloroform-d) = 8.8

**<sup>1</sup>H NMR** (400 MHz, 1,4-Dioxane-d<sub>8</sub>); *trans* conformer δ / ppm = 4.80 (dd, *J* = 8.2, 3.4 Hz, 1H; H $\alpha$ ), 3.64 (ddd, *J* = 9.5, 7.9, 4.8 Hz, 1H; H $\delta$ ), 3.48 (ddd, *J* = 9.5, 7.2 Hz, 1H; H $\delta$ ), 3.09 (s, 3H; NMe), 2.86 (s, 3H; NMe), 2.20 – 1.99 (m, 2H), 1.97 (s, 3H; Ac), 1.94 – 1.77 (m, 2H).

Isolated signals of the *cis* conformer δ / ppm = 4.66 (dd, *J* = 8.6, 2.8 Hz, 1H; H $\alpha$ ), 2.31 – 2.20 (m, 1H), 3.05 (s, 3H; NMe), 2.92 (s, 3H; NMe), 1.76 (s, 3H; Ac).

**<sup>13</sup>C NMR** (101 MHz, 1,4-Dioxane-d<sub>8</sub>); *trans* conformer δ / ppm = 172.3 (carbonyl), 169.6 (carbonyl), 56.7 (C $\alpha$ ), 48.4 (C $\delta$ ), 37.0 (NMe), 35.8 (NMe), 29.7 (C $\beta$ ), 25.3 (C $\gamma$ ), 21.8 (Ac).

**K<sub>trans/cis</sub>** (400 MHz, 1,4-Dioxane-d<sub>8</sub>) = 6.8

**HRMS (ESI):** *m/z* calcd for C<sub>9</sub>H<sub>16</sub>N<sub>2</sub>O<sub>2</sub>: 207.1104 [M+Na]<sup>+</sup>; found: 207.1107 [M+Na]<sup>+</sup>.

### 2.3. Ac-(4*R*)Flp-OMe (2*R*-OMe)

#### Boc-(4*R*)Flp-OMe

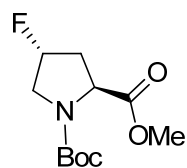

Boc-(4*R*)Flp-OH (415 mg, 1.78 mmol) was suspended in toluene (11.86 mL) and MeOH (3.5 ml) and set under an Ar atmosphere. Trimethylsilyldiazomethane (264.2 mg, 1.3 equiv., 1.16 ml) was added, while the reaction mixture turned yellow and gas formation was observed. The reaction mixture was stirred for 10 min and quenched with AcOH in MeOH. The ester Boc-(4*R*)Flp-OMe was purified by flash chromatography on silica (CH<sub>2</sub>Cl<sub>2</sub> → 3% MeOH → 5% MeOH in CH<sub>2</sub>Cl<sub>2</sub>). The title compound (394 mg, 90%) was isolated in as colorless solid.

**TLC** *R<sub>f</sub>* = 0.61 (5% MeOH, ninhydrin).

**<sup>1</sup>H NMR** (500 MHz, Chloroform-*d*) δ / ppm = 5.33 – 5.10 (m, 1H; H<sub>γ</sub>), 4.40 (dd, *J* = 9.3, 7.5 Hz, 1H, H<sub>α</sub>), 3.91 (ddd, *J* = 22.5, 13.1, 2.4 Hz, 1H; H<sub>δ</sub>), 3.74 (s, 3H; OMe), 3.66 (dd, *J* = 13.0, 3.4 Hz, 1H; H<sub>δ</sub>), 2.67 – 2.49 (m, 1H; H<sub>β</sub>), 2.20 – 2.00 (m, 1H; H<sub>β</sub>), 1.42 (s, 9H; Boc). Isolated signals of the *minor* conformer δ/ppm = 4.47 (ψt, *J* = 8.3 Hz, 1H; H<sub>α</sub>), 3.81 (ddd, *J* = 22.5, 12.9, 2.2 Hz, 1H; H<sub>δ</sub>), 3.76 (s, 3H; OMe), 3.58 (dd, *J* = 13.0, 3.4 Hz, 1H; H<sub>δ</sub>), 1.46 (s, 9H; Boc).

#### TFA H-(4*R*)Flp-OMe

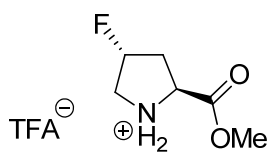

Boc-(4*R*)Flp-OMe (394 mg) was dissolved in TFA:CH<sub>2</sub>Cl<sub>2</sub> (1:1, 4 ml) and stirred for 3 hours. The mixture was concentrated under reduced pressure and the residue was suspended in little CH<sub>2</sub>Cl<sub>2</sub>. Upon addition of Et<sub>2</sub>O a the title compound (416 mg, quant.) precipitated as colourless solid that was filtered off.

**<sup>1</sup>H NMR** (500 MHz, Deuterium Oxide) δ / ppm = 5.64 – 5.40 (m, 1H; H<sub>γ</sub>), 4.78 – 4.70 (m, 1H, H<sub>α</sub>), 3.84 (s, 3H; OMe), 3.81 – 3.57 (m, 2H; H<sub>δ</sub>), 2.89 – 2.72 (m, 1H; H<sub>β</sub>), 2.53 – 2.26 (m, 1H; H<sub>β</sub>).

## Ac-(4*R*)Flp-OMe (2*R*-OMe)

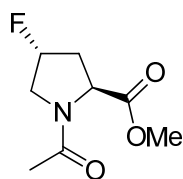

H-(4*R*)Flp-OMe·TFA (394 mg, 1.59 mmol, 1.0 equiv.) was suspended in of CH<sub>2</sub>Cl<sub>2</sub> (3.19 ml) and NEt<sub>3</sub> (551 μl, mmol, 2.50 equiv.) was added. After cooling with an ice bath Ac<sub>2</sub>O (301 μl, 3.18 mmol, 2.00 equiv.) was added and the reaction mixture was stirred overnight. The reaction mixture was diluted with CH<sub>2</sub>Cl<sub>2</sub> (100 ml) and washed with HCl (1M, 3 x 100 ml) and saturated NaHCO<sub>3</sub> (3 x 100 ml). The organic layer was dried over MgSO<sub>4</sub> and concentrated under reduced pressure. After purification with flash chromatography on silica the title compound (274 mg, 91%) was obtained as colorless oil.

The analytical data are in agreement with published data.<sup>[1]</sup>

**<sup>1</sup>H NMR** (400 MHz, Deuterium Oxide); *trans* conformer δ / ppm = 5.55 – 5.35 (dm, *J* = 51.7 Hz, 1H; H<sub>γ</sub>), 4.59 (dd, *J* = 10.0, 7.8 Hz, 1H; H<sub>α</sub>), 4.09 – 3.84 (m, 2H; H<sub>δ</sub>), 3.79 (s, 3H; OMe), 2.78 – 2.66 (m, 1H; H<sub>β</sub>), 2.35 – 2.13 (m, 4H; H<sub>β</sub>, Ac). Isolated signals of the *cis* conformer δ / ppm = 5.49 – 5.29 (dm, *J* = 52.2 Hz, 1H; H<sub>γ</sub>), 4.93 (ψt, *J* = 8.4 Hz, 1H; H<sub>α</sub>), 4.20 – 4.09 (m, 1H; H<sub>δ</sub>), 3.84 (s, 3H; OMe), 3.64 – 3.45 (m, 1H; H<sub>δ</sub>), 2.94 – 2.79 (m, 1H; H<sub>β</sub>), 2.54 – 2.35 (m, 1H; H<sub>β</sub>), 2.04 (s, 3H; Ac).

**<sup>13</sup>C NMR** (101 MHz, Deuterium Oxide); *trans* conformer δ / ppm = 174.3 (carbonyl), 173.3 (carbonyl), 92.8 (d, *J* = 175.2 Hz; C<sub>γ</sub>), 57.6 (C<sub>α</sub>), 54.5 (d, *J* = 22.3 Hz; C<sub>δ</sub>), 53.1 (OMe), 35.6 (d, *J* = 22.1 Hz; C<sub>β</sub>), 21.3 (Ac). Isolated signals of the *cis* conformer δ / ppm = 91.5 (d, *J* = 174.6 Hz; C<sub>γ</sub>), 58.5 (C<sub>α</sub>), 53.4 (OMe), 52.8 (d, *J* = 22.8 Hz; C<sub>δ</sub>), 37.1 (d, *J* = 22.2 Hz; C<sub>β</sub>), 20.8 (Ac).

**K<sub>trans/cis</sub>** (400 MHz, Deuterium Oxide) = 6.7

**<sup>1</sup>H NMR** (400 MHz, Chloroform-d); *trans* conformer δ / ppm = 5.40 – 5.19 (dm, *J* = 51.6 Hz 1H; H<sub>γ</sub>), 4.62 – 4.52 (ψt, *J* = 8.5 Hz, 1H; H<sub>α</sub>), 3.89 – 3.76 (m, 2H; H<sub>δ</sub>), 3.75 (s, 3H; OMe), 2.67 – 2.53 (m, 1H; H<sub>β</sub>), 2.20 – 2.02 (m, 4H; H<sub>β</sub>, Ac). Isolated signals of the *cis* conformer δ / ppm = 5.32 – 5.13 (m, *J* = 52.5 Hz, 1H; H<sub>γ</sub>), 4.23 (dddd, *J* = 21.4, 13.8, 2.6, 1.0 Hz, 1H; H<sub>δ</sub>), 3.62 – 3.43 (m, 1H; H<sub>δ</sub>), 2.81 – 2.68 (m, 1H; H<sub>β</sub>), 2.37 – 2.20 (m, 1H; H<sub>β</sub>), 1.99 (s, 3H; Ac).

**<sup>13</sup>C NMR** (101 MHz, Chloroform-d); *trans* conformer δ / ppm = 172.6 (carbonyl), 169.5 (carbonyl), 92.0 (d, *J* = 180.0 Hz; C<sub>γ</sub>), 57.4 (C<sub>α</sub>), 54.3 (d, *J* = 22.9 Hz, C<sub>δ</sub>), 52.6 (OMe), 36.24 (d, *J* = 22.4 Hz; C<sub>β</sub>), 22.4 (Ac). Isolated signals of the *cis* conformer δ / ppm = 170.0 (carbonyl), 90.4 (d, *J* = 178.9 Hz; C<sub>γ</sub>), 58.4 (C<sub>α</sub>), 53.0 (OMe), 38.4 (d, *J* = 23.0 Hz; C<sub>β</sub>), 21.8 (Ac).

**K<sub>trans/cis</sub>** (400 MHz, Chloroform-d) = 4.4

**HRMS** (ESI): *m/z* calcd for C<sub>8</sub>H<sub>12</sub>FNO<sub>3</sub>+H<sup>+</sup>: 190.0874 [M+H]<sup>+</sup>; found: 190.0872 [M+H]<sup>+</sup>.

## 2.4. Ac-(4*R*)Flp-NMe<sub>2</sub> (2*R*-NMe<sub>2</sub>)

### Boc-(4*R*)Flp-NMe<sub>2</sub>

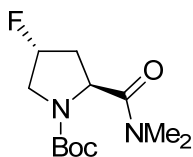

Boc-(4*R*)Flp-OH (250 mg, 1.07 mmol, 1.0 eq) was suspended in CH<sub>2</sub>Cl<sub>2</sub> (4.3 ml) and *i*Pr<sub>2</sub>NEt (459 μl, 2.68 mmol, 2.5 eq) was added whereupon the suspension turned into a solution. Next EDC·HCl (288 mg, 1.50 mmol, 1.4 eq) and HNMe<sub>2</sub>·HCl (131 mg, 1.61 mmol, 1.5 eq) were added and the solution was stirred overnight. The solution was diluted with CH<sub>2</sub>Cl<sub>2</sub> (50 ml) and washed with 1M HCl (3 x 20 ml), dried over MgSO<sub>4</sub> and concentrated under reduced pressure. The oily residue was subjected to column chromatography on silica (7% MeOH in CH<sub>2</sub>Cl<sub>2</sub>) to obtain the title compound (173 mg, 62%) as a colourless oil.

**TLC** R<sub>f</sub> = 0.38 (silica, 7% MeOH in CH<sub>2</sub>Cl<sub>2</sub>, ninhydrin).

(two isomers are visible in the <sup>1</sup>H NMR- and <sup>13</sup>C NMR-spectra in a ratio of ≈ 1:1 in CDCl<sub>3</sub>).

**<sup>1</sup>H NMR** (400 MHz, CDCl<sub>3</sub>) δ/ppm = 5.35-5.16 (m, 1H; H<sub>γ</sub>), 4.88 (t, *J* = 7.8 Hz, 1H; H<sub>α</sub>), 3.92 (ddd, *J* = 22.6 Hz, 13.1 Hz, 2.1 Hz, 1H; H<sub>δ</sub>), 3.66 (dt, *J* = 12.9 Hz, 4.0 Hz, 1H; H<sub>δ</sub>), 3.17 (s, 3H; NMe<sub>2</sub>), 3.01 (s, 3H; NMe<sub>2</sub>), 2.54-2.39 (m, 1H; H<sub>β</sub>), 2.25-2.05 (m, 1H; H<sub>β</sub>), 1.47 (s, 9H; Boc). Isolated signal of the other conformer: 4.78 (dd, *J* = 8.4 Hz, 7.7 Hz, 1H; H<sub>α</sub>), 3.85 (dd, *J* = 22.4 Hz, 13.0 Hz, 1H; H<sub>δ</sub>), 3.75 (ddd, *J* = 12.9 Hz, 6.3 Hz, 3.4 Hz, 1H; H<sub>δ</sub>), 3.11 (s, 3H; NMe<sub>2</sub>), 2.99 (s, 3H; NMe<sub>2</sub>), 1.43 (s, 9H; Boc).

**<sup>19</sup>F NMR** (376 MHz, CDCl<sub>3</sub>) δ/ppm = -176.2 (s), -177.0 (s) (both conformers).

**<sup>13</sup>C NMR** (101 MHz, CDCl<sub>3</sub>) δ/ppm = 172.6 (amide), 154.7 (Boc), 93.3 (d, *J* = 81.3 Hz; C<sub>γ</sub>), 80.5 (Boc), 54.7 (C<sub>α</sub>), 53.9 (d, *J* = 22.7 Hz; C<sub>δ</sub>), 37.9 (NMe<sub>2</sub>), 37.7 (d, *J* = 6.5 Hz; C<sub>β</sub>), 37.5 (NMe<sub>2</sub>), 28.8 (Boc). Isolated signals the other conformer: 172.5 (amide), 91.6 (d, *J* = 80.7 Hz; C<sub>γ</sub>), 80.5 (Boc), 54.7 (C<sub>α</sub>), 53.6 (d, *J* = 21.8 Hz; C<sub>δ</sub>), 37.1 (NMe<sub>2</sub>), 36.9 (NMe<sub>2</sub>), 36.5 (d, *J* = 5.6 Hz; C<sub>β</sub>), 28.7 (Boc).

**ESI-MS:** *m/z* calcd for C<sub>12</sub>H<sub>21</sub>FN<sub>2</sub>O<sub>3</sub>: 260.2; found: 283.3 [M+Na]<sup>+</sup> (100%).

## H-(4*R*)Flp-NMe<sub>2</sub>·HCl

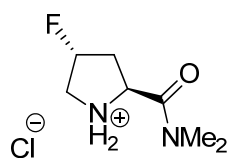

Boc-(4*R*)Flp-NMe<sub>2</sub> (173 mg, 665 μmol, 1.0 eq) was dissolved in HCl (1.7 ml, 4M in dioxane) and stirred for 3 hours. The solution was concentrated under reduced pressure to obtain the title compound (180 mg, quant.) as slightly yellowish oil.

**TLC** *R<sub>f</sub>* = 0.43 (silica, MeCN:H<sub>2</sub>O 4:1, ninhydrin).

**<sup>1</sup>H NMR** (400 MHz, D<sub>2</sub>O) δ/ppm = 5.49 (dt, *J* = 50.8 Hz, 3.3 Hz, 1H; Cγ), 4.93 (dd, *J* = 10.2 Hz, 8.0 Hz, 1H; Cα), 3.72 (ddd, *J* = 19.1 Hz, 13.7 Hz, 2.2 Hz, 1H; Cδ), 3.55 (ddd, *J* = 37.7 Hz, 13.7 Hz, 3.0 Hz, 1H; Cδ), 3.01 (s, 3H; NMe<sub>2</sub>), 2.91 (s, 3H; NMe<sub>2</sub>), 2.94-2.81 (m, 1H; Hβ), 2.16 (dddd, *J* = 15.0 Hz, 14.4 Hz, 10.3 Hz, 3.8 Hz, 1H).

**<sup>13</sup>C NMR** (101 MHz, D<sub>2</sub>O) δ/ppm = 168.4 (amide), 93.3 (d, *J* = 175.7 Hz; Cγ), 57.8 (Cα), 52.5 (d, *J* = 23.0 Hz; Cδ), 37.0 (NMe<sub>2</sub>), 36.3 (NMe<sub>2</sub>), 36.0 (d, *J* = 22.0 Hz; Cβ).

**ESI-MS:** *m/z* calcd for C<sub>7</sub>H<sub>14</sub>ClFN<sub>2</sub>O: 196.1; found: 161.1 [M-Cl]<sup>+</sup> (100%).

## Ac-(4*R*)Flp-NMe<sub>2</sub> (2*R*-NMe<sub>2</sub>)

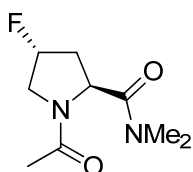

H-(4*R*)Flp-NMe<sub>2</sub>·HCl (180 mg, 914 μmol, 1.0 eq) was suspended in CH<sub>2</sub>Cl<sub>2</sub> (3 ml) and NEt<sub>3</sub> (380 μl, 2.74 mmol, 3.0 eq) was added. After cooling with an ice bath Ac<sub>2</sub>O (242 μl, 2.56 mmol, 2.8 eq) was added and the reaction mixture was stirred overnight. The reaction mixture was concentrated under reduced pressure, diluted with dioxane: water 1:1 and concentrated again, to remove residual Ac<sub>2</sub>O. AcOH was removed by coevaporation with toluene. The residue was purified by ion exchange chromatography over Amberlite IR-120H ion exchange resin to remove NEt<sub>3</sub>. The title compound (105 mg, 57 %) was obtained as colourless oil.

**TLC** R<sub>f</sub> = 0.40 (10% MeOH in CH<sub>2</sub>Cl<sub>2</sub>, TDM or Vanillin).

**HRMS** (ESI): *m/z* calcd for C<sub>9</sub>H<sub>15</sub>FN<sub>2</sub>O<sub>2</sub>+H<sup>+</sup>: 203.1190 [M+H]<sup>+</sup>; found: 203.1189 [M+H]<sup>+</sup>.

**<sup>1</sup>H NMR** (400 MHz, Deuterium Oxide); *trans* conformer δ / ppm = 5.55 – 5.36 (dm, *J* = 52.0 Hz, 1H; H<sub>γ</sub>), 5.08 – 4.97 (dψd, *J* = 9.3, 1.5 Hz, 1H; H<sub>α</sub>), 4.05 (ddd, *J* = 21.6, 13.0, 2.3 Hz, 1H; H<sub>δ</sub>), 3.87 (ddd, *J* = 38.4, 13.1, 3.1 Hz, 1H; H<sub>δ</sub>), 3.18 (s, 3H; NMe), 2.97 (s, 3H; NMe), 2.81 – 2.68 (m, 1H; H<sub>β</sub>), 2.14 (s, 3H; Ac), 2.18 – 1.96 (m, *J* = 14.8, 9.7, 3.8, 0.7 Hz, 1H; H<sub>β</sub>). Isolated signals of the *cis* conformer δ / ppm = 5.50 – 5.29 (dm, *J* = 51.9 Hz, 1H; H<sub>γ</sub>), 5.26 (ψt, *J* = 8.4 Hz, 1H; H<sub>α</sub>), 4.20 – 4.09 (m, 1H; H<sub>δ</sub>), 3.56 (dddd, *J* = 38.1, 13.9, 3.2, 0.7 Hz, 1H; H<sub>δ</sub>), 3.20 (s, 3H; NMe), 3.01 (s, 3H; NMe), 2.33 – 2.20 (m, 1H; H<sub>β</sub>), 1.95 (s, 3H; Ac).

**<sup>13</sup>C NMR** (101 MHz, Deuterium Oxide); *trans* conformer δ / ppm = 172.7 (carbonyl), 172.6 (carbonyl), 92.9 (d, *J* = 174.8 Hz, C<sub>γ</sub>), 55.4 (C<sub>α</sub>), 54.8 (d, *J* = 22.1 Hz; C<sub>δ</sub>), 37.0 (NMe), 35.9 (NMe), 35.1 (d, *J* = 22.0 Hz; C<sub>β</sub>), 21.4 (Ac). Isolated signals of the *cis* conformer δ / ppm = 57.0 (C<sub>α</sub>), 53.3 (d, *J* = 22.4 Hz; C<sub>δ</sub>), 36.7 (d, *J* = 22.5 Hz; C<sub>β</sub>), 36.8 (NMe), 36.1 (NMe), 20.7 (Ac).

**K<sub>trans/cis</sub>** (400 MHz, Deuterium Oxide) = 4.5

**<sup>1</sup>H NMR** (600 MHz, Chloroform-*d*); *trans* conformer δ / ppm = 5.40 – 5.27 (dm, *J* = 53.0 Hz, 1H; H<sub>γ</sub>), 4.98 (t, *J* = 7.9 Hz, 1H; H<sub>α</sub>), 3.88 (ddd, *J* = 34.7, 12.1, 3.4 Hz, 1H; H<sub>δ</sub>), 3.81 (dddd, *J* = 21.4, 12.2, 2.1, 1.1 Hz, 1H; H<sub>δ</sub>), 3.18 (s, 3H; NMe), 2.96 (s, 3H; NMe), 2.45 (dddt, *J* = 21.0, 14.3, 7.9, 1.8 Hz, 1H; H<sub>β</sub>), 2.27 – 2.14 (m, 1H; H<sub>β</sub>), 2.08 (s, 3H; Ac). Isolated signals of the *cis* conformer δ / ppm = 5.28 – 5.17 (m, 1H; H<sub>γ</sub>), 4.85 (t, *J* = 8.1 Hz, 1H; H<sub>α</sub>), 4.23 (ddd, *J* = 21.8, 14.0, 2.1 Hz, 1H; H<sub>δ</sub>), 3.60 (ddd, *J* = 37.1, 13.8, 3.4 Hz, 1H; H<sub>δ</sub>), 3.11 (s, 3H; NMe), 3.01 (s, 3H; NMe), 2.74 – 2.64 (m, 1H; H<sub>β</sub>), 1.91 (s, 3H; Ac).

**$^{13}\text{C}$  NMR** (151 MHz, Chloroform-d); *trans* conformer  $\delta$  / ppm = 171.9 (carbonyl), 169.4 (carbonyl), 92.6 (d,  $J$  = 178.9 Hz;  $\text{C}\gamma$ ), 54.6 (d,  $J$  = 22.6 Hz;  $\text{C}\delta$ ), 54.4 ( $\text{C}\alpha$ ), 37.6 (NMe), 36.3 (d,  $J$  = 21.9 Hz;  $\text{C}\beta$ ), 36.2 (NMe) 22.49 (Ac). Isolated signals of the *cis* conformer  $\delta$  / ppm = 171.1 (carbonyl), 169.9 (carbonyl), 90.8 (d,  $J$  = 177.9 Hz;  $\text{C}\gamma$ ), 56.34 ( $\text{C}\alpha$ ), 53.2 (d,  $J$  = 22.5 Hz;  $\text{H}\delta$ ), 38.2 (d,  $J$  = 22.7 Hz;  $\text{C}\beta$ ), 36.9 (NMe), 21.9 (Ac).

**Noesy** (600 MHz, Chloroform-d) cross peak 4.89 ppm ( $\text{H}\alpha$  minor) and 1.91 ppm (Ac minor)  $\rightarrow$  *cis* conformer.

**$K_{\text{trans/cis}}$**  (600 MHz, Chloroform-d) = 9.8

## 2.5. Ac-(4*R*)Azp-NMe<sub>2</sub> (3*R*-NMe<sub>2</sub>)

### Ac-(4*R*)Azp-OH

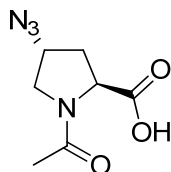

300 mg (1.41 mmol) Ac-(4*R*)Azp-OMe (300 mg, 1.41 mmol) were dissolved in THF (7 ml) and diluted with MeOH (7 ml). NaOH (85 mg, 2.1 mmol in 1.4 ml H<sub>2</sub>O) was added to the solution. The reaction mixture was stirred at room temperature for 2 h. The mixture was neutralized with HCl (1 M) and the solvent volume was reduced under reduced pressure. The remaining solution was diluted with CH<sub>2</sub>Cl<sub>2</sub> and washed with HCl (1M, 30 ml). The aqueous layer was washed with CH<sub>2</sub>Cl<sub>2</sub> (4 times), the combined organic layers were dried over Na<sub>2</sub>SO<sub>4</sub> and concentrated under reduced pressure. The title compound (281 mg, quant.) was obtained as colorless solid.

Two isomers are visible in the <sup>1</sup>H NMR- and <sup>13</sup>C NMR-spectra in a ratio of 1:4 in D<sub>2</sub>O.

**<sup>1</sup>H-NMR** (400 MHz, Deuterium Oxide):  $\delta$  / ppm (*major*) = 4.39-4.32 (m, 2H; H $\alpha$ , H $\gamma$ ), 3.75 (dd,  $J$  = 11.7 Hz,  $J$  = 4.9 Hz, 1H; H $\delta$ ), 3.63-3.56 (m, 1H; H $\delta$ ), 2.39 (dddd,  $J$  = 13.3 Hz, 8.1 Hz, 3.4 Hz, 1.5 Hz, 1H; H $\beta$ ), 2.32 (ddd,  $J$  = 13.7 Hz, 8.3 Hz, 5.4 Hz, 1H; H $\beta$ ), 2.00 (s, 3H; Ac). Isolated signals of the *minor* conformer  $\delta$  / ppm = 4.63 (dd,  $J$  = 8.3 Hz, 6.9 Hz, 1H; H $\alpha$ ), 4.33 (m, 1H; H $\gamma$ ), 3.58-3.52 (m, 1H; H $\delta$ ), 3.41 (dd,  $J$  = 12.6 Hz, 5.4 Hz, 1H; H $\delta$ ), 2.19 (dddd,  $J$  = 13.7 Hz, 8.5 Hz, 4.4 Hz, 1.5 Hz, 1H; H $\beta$ ), 2.19 (ddd,  $J$  = 13.8 Hz, 6.7 Hz, 5.6 Hz, 1H; H $\beta$ ), 1.89 (s, 3H; Ac).

**<sup>13</sup>C-NMR** (101 MHz, D<sub>2</sub>O+0.07 M NaOD, 25°C):  $\delta$  / ppm (both conformers) = 179.1, 179.0, 174.0, 172.9, 61.9, 60.4, 60.2, 58.9, 53.9, 51.7, 37.0, 35.0, 21.9, 21.1.

**MS** (ESI, neg):  $m/z$  (%) = 395.3 [2M-H]<sup>-</sup> (100), 197.2 [M-H]<sup>-</sup> (25), calculated for C<sub>7</sub>H<sub>10</sub>N<sub>4</sub>O<sub>3</sub>.



### Ac-(4R)Azp-NMe<sub>2</sub> (3R-NMe<sub>2</sub>)

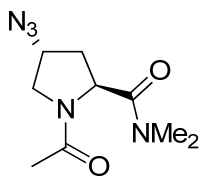

Ac-(4S)Azp-OH (30 mg, 0.152 mmol) was dissolved in CH<sub>2</sub>Cl<sub>2</sub> (500 μl) and pentafluorophenol (29 mg, 0.158 mmol) and EDC (43 mg, 0.225 mmol) were added. The reaction mixture was stirred at room temperature for 1 h, diluted with CH<sub>2</sub>Cl<sub>2</sub>, washed with HCl (0.5M) and the aqueous phase was extracted with CH<sub>2</sub>Cl<sub>2</sub>. The combined organic layers were dried over Na<sub>2</sub>SO<sub>4</sub> and concentrated under reduced pressure. The oily pentafluorophenylesters residue (55 mg, 0.151 mmol, 99%) was dissolved in dry CH<sub>2</sub>Cl<sub>2</sub> (1 ml). NEt<sub>3</sub> (213 μl, 1.53 mmol) and dimethylamide hydrochloride (114 mg, 1.40 mmol) were added and the reaction mixture was stirred at room temperature for 1h. The mixture was diluted with CH<sub>2</sub>Cl<sub>2</sub> and washed with HCl (1M). The combined organic layers were dried over Na<sub>2</sub>SO<sub>4</sub> and concentrated under reduced pressure. The title compound (25 mg, 78%) was purified by flash chromatography on silica (4% - 6% MeOH in CH<sub>2</sub>Cl<sub>2</sub>) and isolated as colorless oil.

<sup>1</sup>H NMR (400 MHz, Deuterium Oxide); *trans* conformer δ / ppm = 4.80 (ψt, J = 8.1 Hz, 1H; Hα), 4.33 (m, 1H; Hγ), 3.73 (dd, J = 11.8, 4.8 Hz, 1H; Hδ), 3.63 (dt, J = 11.8, 2 Hz, 1H; Hδ), 3.03 (s, 3H; NMe), 2.82 (s, 3H; NMe), 2.39 (dddd, J = 13.5, 8.0, 3.0, 1.4 Hz, 1H; Hβ), 1.99 (m, 1H; Hβ), 1.99 (s, 3H; Ac). Isolated signals of the *cis* conformer δ / ppm = 5.03 (dd, J = 7.7, 1H; Hα), 4.25 (m, 1H; Hγ), 3.67 (dt, J = 13.0, 2.0 Hz, 1H; Hδ), 3.48 (dd, J = 12.6, 5.1 Hz, 1H; Hδ), 3.04 (s, 3H; NMe), 2.86 (s, 3H; NMe), 2.53 (dddd, J = 13.6, 8.2, 3.6, 1.6 Hz, 1H; Hβ), 2.12 (ddd, J = 13.7, 7.2, 5.7 Hz, 1H; Hβ), 1.79 (s, 3H; Ac).

<sup>13</sup>C NMR (101 MHz, Deuterium Oxide); *trans* conformer: δ / ppm = 173.0, 172.8, 60.3, 56.0, 53.8, 37.4, 36.3, 34.3, 21.7. *cis* conformer 173.8, 172.7, 58.7, 57.7, 52.0, 37.2, 36.4, 35.9, 21.0.

K<sub>trans/cis</sub> (400 MHz, Deuterium Oxide) = 3.8

<sup>1</sup>H NMR (400 MHz, Chloroform-d); *trans* conformer δ / ppm = 4.93 (dd, J = 7.7, 6.1 Hz, 1H; Hα), 4.45 (qd, J = 5.6, 3.8 Hz, 1H; Hγ), 3.94 (dd, J = 10.7, 5.8 Hz, 1H; Hδ), 3.50 (ddd, J = 10.8, 3.9, 0.7 Hz, 1H; Hδ), 3.18 (s, 3H; NMe), 2.97 (s, 3H; NMe), 2.28 – 2.15 (m, 2H; Hβ), 2.08 (s, 3H; Ac). Isolated signals of the *cis* conformer δ / ppm = 4.76 (dd, J = 8.2, 6.1 Hz, 1H; Hα), 4.24 (m, J = 5.2 Hz, 1H; Hγ), 3.90 – 3.83 (m, 1H; Hδ), 3.77 (dd, J = 12.4, 5.5 Hz, 1H; Hδ), 3.11 (s, 3H; NMe), 3.02 (s, 3H; NMe), 2.42 (dddd, J = 13.0, 8.3, 4.6, 1.5 Hz, 1H; Hβ), 1.90 (s, 3H; Ac).

<sup>13</sup>C NMR (101 MHz, Chloroform-d); *trans* conformer δ / ppm = 171.6, 169.2, 77.2, 60.0, 54.6, 52.9, 37.5, 36.2, 34.9, 22.4.

K<sub>trans/cis</sub> (400 MHz, Chloroform-d) = 9.6

MS (ESI): m/z (%) = 248.0 [M+Na]<sup>+</sup> (100), 473.1 [2M+Na]<sup>+</sup> (60) calcd. for C<sub>9</sub>H<sub>15</sub>N<sub>5</sub>O<sub>2</sub>.

## 2.6. Ac-(4S)Flp-OMe (2S-OMe)

### Ac-(4S)Flp-OMe (2S-OMe)

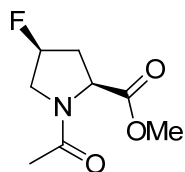

Boc-(4S)Flp-OH (250 mg, 1.07 mmol) dissolved in MeOH (25 ml) and cooled in an ice bath before acetyl chloride (25 ml) was added slowly. The reaction mixture was stirred at room temperature overnight. The solution was concentrated under reduced pressure and the residue was dissolved in CH<sub>2</sub>Cl<sub>2</sub> (38 ml). DMAP (1.13 g, 9.25 mmol, 8.6 equiv.) and acetyl chloride (224  $\mu$ l, 3.1 mmol, 2.9 equiv.) were added and the reaction mixture was stirred at room temperature overnight.

The solution was quenched with MeOH and concentrated under reduced pressure. The residue was dissolved in citric acid (20 w-%, 200 ml) and extracted with CH<sub>2</sub>Cl<sub>2</sub> (3 x 100 ml). The combined organic layers were dried over MgSO<sub>4</sub>, concentrated under reduced pressure and purified by flash chromatography on silica (5% MeOH in CH<sub>2</sub>Cl<sub>2</sub>). The title compound (106 mg, 52%) was obtained as colourless oil.

The analytical data are in agreement with published data.<sup>[1]</sup>

**TLC** R<sub>f</sub> = 0.41 (silica, 5% MeOH in CH<sub>2</sub>Cl<sub>2</sub>, vanillin).

**<sup>1</sup>H NMR** (600 MHz, Deuterium Oxide); *trans* conformer  $\delta$  / ppm = 5.51 – 5.37 (dm,  $J$  = 52.0 Hz, 1H ; H $\gamma$ ), 4.76 (dd,  $J$  = 8.8, 2.9 Hz, 1H ; H $\alpha$ ), 4.04 – 3.86 (m, 2H ; H $\delta$ ), 3.79 (br.s, 3H; OMe), 2.76 – 2.47 (m, 2H; H $\beta$ ), 2.16 (s, 3H ; Ac). Isolated signals of the *cis* conformer  $\delta$  / ppm = 5.47 – 5.34 (dm,  $J$  = 52.4 Hz, 1H; H $\gamma$ ), 4.95 – 4.90 (d,  $J$  = 9.3 Hz, 1H; H $\alpha$ ), 3.82 (br. s, 3H; OMe), 2.08 (s, 3H; Ac).

**<sup>13</sup>C NMR** (151 MHz, Deuterium Oxide); *trans* conformer  $\delta$  / ppm = 173.8 (carbonyl), 173.4 (carbonyl), 93.4 (d,  $J$  = 173.0 Hz; C $\gamma$ ), 57.4 (C $\alpha$ ), 54.5 (d,  $J$  = 23.1 Hz; C $\delta$ ), 53.1 (OMe), 35.5 (d,  $J$  = 21.1 Hz; C $\beta$ ), 21.3 (Ac).

**Noesy** (600 MHz, Deuterium Oxide) cross peak  $\delta$  / ppm = 2.09 Ac (minor) and 4.9 (H $\alpha$  minor)  $\rightarrow$  *cis* conformer.

**K<sub>trans/cis</sub>** (600 MHz, Deuterium Oxide) = 2.6

**<sup>1</sup>H NMR** (600 MHz, Chloroform-d); *trans* conformer  $\delta$  / ppm = 5.29 (dtt,  $J$  = 52.5, 4.2, 1.1 Hz, 1H; H $\gamma$ ), 4.81 – 4.72 (d,  $J$  = 9.8 Hz, 1H; H $\alpha$ ), 3.94 – 3.71 (m, 5H-m; H $\delta$ , OMe), 2.56 – 2.24 (m, 2H; H $\beta$ ), 2.11 (s, 3H; Ac). Isolated signals of the *cis* conformer  $\delta$  / ppm = 5.29 – 5.17 (dm,  $J$  = 52.4 Hz, 1H; H $\gamma$ ), 4.50 (d,  $J$  = 9.4 Hz, 1H; H $\alpha$ ), 2.75 – 2.67 (m, 1H; H $\beta$ ), 2.05 (s, 3H; Ac).

**<sup>13</sup>C NMR** (151 MHz, Chloroform-d); *trans* conformer  $\delta$  / ppm = 171.3 (carbonyl), 169.6 (carbonyl), 92.3 (d,  $J$  = 179.0 Hz; C $\gamma$ ), 57.1 (C $\alpha$ ), 54.3 (d,  $J$  = 24.7 Hz; C $\delta$ ), 52.6 (OMe), 36.3 (d,  $J$  = 21.7 Hz; C $\beta$ ), 22.4 (Ac). Isolated signals of the *cis* conformer  $\delta$  / ppm = 171.5 (carbonyl), 170.0 (carbonyl), 90.9 (d,  $J$  = 175.8 Hz; C $\gamma$ ), 58.8 (C $\alpha$ ), 53.2 (d,  $J$  = 24.2 Hz; C $\delta$ ), 53.0 (OMe), 38.3 (d,  $J$  = 21.8 Hz; C $\beta$ ), 22.2 (Ac).

**Noesy** (600 MHz, Chloroform-d) cross peak  $\delta$  / ppm = 2.1 (Ac minor) and 4.5 (H $\alpha$  minor)  $\rightarrow$  *cis* conformer.

$K_{\text{trans/cis}}$  (400 MHz, Chloroform-d) = 1.7

**HRMS** (ESI):  $m/z$  calcd for C<sub>8</sub>H<sub>12</sub>FNO<sub>3</sub>+H<sup>+</sup>: 190.0874 [M+H]<sup>+</sup>; found: 190.0876 [M+H]<sup>+</sup>.

## 2.7. Ac-(4*S*)Flp-NMe<sub>2</sub> (2*S*-NMe<sub>2</sub>)

### Boc-(4*S*)Flp-NMe<sub>2</sub>

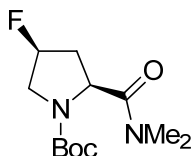

Boc-(4*S*)Flp-OH (250 mg, 1.07 mmol, 1.0 eq) was converted to the title compound according the protocol for its (4*R*)-configured diastereoisomer. The title compound (195 mg, 70 %) was obtained as colourless oil.

**TLC**  $R_f$  = 0.39 (silica, 7% MeOH in CH<sub>2</sub>Cl<sub>2</sub>, ninhydrin).

(two isomers are visible in the <sup>1</sup>H NMR- and <sup>13</sup>C NMR-spectra in a ratio of  $\approx$  2:3 in CDCl<sub>3</sub>).

**<sup>1</sup>H NMR** (400 MHz, CDCl<sub>3</sub>)  $\delta$ /ppm = 5.31-5.13 (m, 1H; H $\gamma$ ), 4.76 (dd,  $J$  = 9.6 Hz, 2.1 Hz, 1H; H $\alpha$ ), 3.96-3.71 (m, 2H; H $\delta$ ), 3.05 (s, 3H; NMe<sub>2</sub>), 2.99 (s, 3H; NMe<sub>2</sub>), 2.60-2.37 (m, 1H; H $\beta$ ), 2.31-2.16 (m, 1H; H $\beta$ ), 1.48 (s, 9H; Boc). Isolated signals of the minor conformer: 4.63 (dd,  $J$  = 9.5 Hz, 2.9 Hz, 1H; H $\alpha$ ), 3.00 (s, 3H; NMe<sub>2</sub>), 1.42 (s, 9H; Boc).

**<sup>13</sup>C NMR** (101 MHz, CDCl<sub>3</sub>)  $\delta$ /ppm = 172.6 (amide), 154.7 (Boc), 93.3 (d,  $J$  = 81.3 Hz; C $\gamma$ ), 80.5 (Boc), 54.7 (C $\alpha$ ), 53.9 (d,  $J$  = 22.7 Hz; C $\delta$ ), 37.9 (NMe<sub>2</sub>), 37.7 (d,  $J$  = 6.5 Hz; C $\beta$ ), 37.5 (NMe<sub>2</sub>), 28.8 (Boc). Isolated signals the other conformer: 172.5 (amide), 91.6 (d,  $J$  = 80.7 Hz; C $\gamma$ ), 80.5 (Boc), 54.7 (C $\alpha$ ), 53.6 (d,  $J$  = 21.8 Hz; C $\delta$ ), 37.1 (NMe<sub>2</sub>), 36.9 (NMe<sub>2</sub>), 36.5 (d,  $J$  = 5.6 Hz; C $\beta$ ), 28.7 (Boc).

**ESI-MS**:  $m/z$  calcd for C<sub>12</sub>H<sub>21</sub>FN<sub>2</sub>O<sub>3</sub>: 260.2; found: 283.3 [M+Na]<sup>+</sup> (100%).

## H-(4S)Flp-NMe<sub>2</sub>·HCl

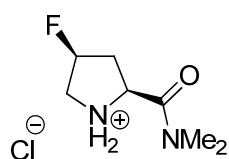

Boc-(4S)Flp-NMe<sub>2</sub> (195 mg, 749  $\mu$ mol, 1.0 eq) was dissolved in 4M HCl in dioxane and stirred for 2.5 hours. The mixture was concentrated under reduced pressure and the residue was suspended in little CH<sub>2</sub>Cl<sub>2</sub> and dissolved in as little MeOH as possible. Upon addition of Et<sub>2</sub>O the title compound precipitated as colorless solid (147 mg, quant.) and filtered off.

**TLC** R<sub>f</sub> = 0.20 (silica, 10% MeOH in CH<sub>2</sub>Cl<sub>2</sub>, ninhydrin).

**<sup>1</sup>H NMR** (400 MHz, CDCl<sub>3</sub>)  $\delta$ /ppm = 5.40 (dt,  $J$  = 50.9 Hz, 3.7 Hz, 1H; H $\gamma$ ), 4.80 (dd,  $J$  = 11.1 Hz, 3.9 Hz, 1H; H $\alpha$ ), 3.81 (ddd,  $J$  = 17.7 Hz, 13.6 Hz, 2.3 Hz, 1H; H $\delta$ ), 3.46 (ddd,  $J$  = 37.6 Hz, 13.6 Hz, 3.2 Hz, 1H; H $\delta$ ), 2.96 (s, 1H; NMe<sub>2</sub>), 2.89 (s, 1H; NMe<sub>2</sub>), 2.78 (dddd,  $J$  = 40.7 Hz, 15.5 Hz, 11.1 Hz, 4.4 Hz, 1H; H $\beta$ ), 2.44-2.30 (m, 1H; H $\beta$ ).

**<sup>19</sup>F NMR** (376 MHz, D<sub>2</sub>O)  $\delta$ /ppm = -175.0 (dddd,  $J$  = 50.9 Hz, 40.9 Hz, 37.7 Hz, 23.3 Hz, 17.8 Hz).

**<sup>13</sup>C NMR** (101 MHz, D<sub>2</sub>O)  $\delta$ /ppm = 168.7 (amide), 92.2 (d,  $J$  = 175.6 Hz; C $\gamma$ ), 57.8 (C $\alpha$ ), 52.6 (d,  $J$  = 23.0 Hz; C $\delta$ ), 36.9 (NMe<sub>2</sub>), 36.2 (NMe<sub>2</sub>), 36.0 (d,  $J$  = 22.1 Hz; C $\beta$ ).

**ESI-MS:**  $m/z$  calcd for C<sub>7</sub>H<sub>14</sub>ClFN<sub>2</sub>O: 196.1; found: 161.1 [M-Cl]<sup>+</sup> (100%).

### Ac-(4*S*)Flp-NMe<sub>2</sub> (2*S*-NMe<sub>2</sub>)

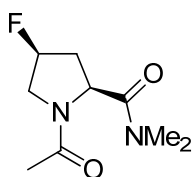

H-(4*S*)Flp-NMe<sub>2</sub>·HCl (120 mg, 610 μmol, 1.0 eq) was acetylated according the protocol for the preparation of its (4*R*)-configured diastereoisomer to obtain the title compound (66.6 mg, 54%) as colourless solid.

TLC R<sub>f</sub> = 0.42 (10% MeOH in CH<sub>2</sub>Cl<sub>2</sub>, TDM or Vanillin).

<sup>1</sup>H NMR (400 MHz, Deuterium Oxide); *trans* conformer δ / ppm = 5.42 (d<sub>ψtψt</sub>, *J* = 52.7, 4.1, 1.0 Hz, 1H; H<sub>γ</sub>), 5.00 (d, *J* = 10.4 Hz, 1H; H<sub>α</sub>), 4.08 – 3.88 (m, 2H; H<sub>δ</sub>), 3.12 (s, 3H; NMe), 2.96 (s, 3H; NMe), 2.66 (dddd, *J* = 44.1, 14.8, 10.4, 4.1 Hz, 1H; H<sub>β</sub>), 2.35 (ddtd, *J* = 20.9, 15.2, 1.8, 1.1 Hz, 1H; H<sub>β</sub>), 2.14 (s, 3H; Ac). Isolated signals of the *cis* conformer δ / ppm = 5.47 – 5.29 (dm, *J* = 52.5 Hz, 1H; H<sub>γ</sub>), 5.14 (d, *J* = 10.0 Hz, 1H; H<sub>α</sub>), 3.88 – 3.71 (m, 2H; H<sub>δ</sub>), 3.14 (s, 3H; NMe), 2.99 (s, 3H; NMe), 2.81 (ddd, *J* = 15.3, 10.1, 4.0 Hz, 1H; H<sub>β</sub>), 2.51 (dddd, *J* = 19.6, 15.1, 2.1, 1.0 Hz, 1H; H<sub>β</sub>), 1.97 (s, 3H; Ac).

<sup>13</sup>C NMR (101 MHz, Deuterium Oxide); *trans* conformer δ / ppm = 172.9 (carbonyl), 172.0 (carbonyl), 93.1 (d, *J* = 174.7 Hz; C<sub>γ</sub>), 56.6 (C<sub>α</sub>), 54.9 (d, *J* = 23.4 Hz; C<sub>δ</sub>), 36.7 (NMe), 35.8 (NMe), 35.4 (d, *J* = 21.4 Hz; C<sub>β</sub>), 21.3 (Ac). Isolated signals of the *cis* conformer δ / ppm = 173.5 (carbonyl), 172.1 (carbonyl), 91.8 (d, *J* = 173.1 Hz; C<sub>γ</sub>), 58.4 (C<sub>α</sub>), 53.8 (d, *J* = 23.6 Hz; C<sub>δ</sub>), 37.1 (d, *J* = 21.4 Hz; C<sub>β</sub>), 36.8 (NMe), 35.9 (NMe), 21.1 (Ac).

K<sub>trans/cis</sub> (400 MHz, Deuterium Oxide, H<sub>γ</sub>, Ac) = 2.6

<sup>1</sup>H NMR (400 MHz, Chloroform-d); *trans* conformer δ / ppm = 5.29 (dtt, *J* = 53.9, 5.4, 2.6 Hz, 1H, H<sub>γ</sub>), 4.96 (dd, *J* = 9.5, 2.9 Hz, 1H; H<sub>α</sub>), 4.05 – 3.80 (m, 2H; H<sub>δ</sub>), 3.10 – 2.93 (m, 6H; NMe, NMe), 2.46 (dddd, *J* = 31.9, 14.8, 9.5, 5.5 Hz, 1H; H<sub>β</sub>), 2.32 – 2.19 (m, 1H; H<sub>β</sub>), 2.10 (s, 3H; Ac). Isolated signals of the *cis* conformer δ / ppm = 5.33 – 5.13 (dm, *J* = 53.4 Hz, 1H; H<sub>γ</sub>), 4.69 (d, *J* = 9.9 Hz, 1H; H<sub>α</sub>), 2.64 (dddd, *J* = 9.6, 4.7 Hz, 1H; H<sub>β</sub>), 1.95 (s, 3H; Ac).

<sup>13</sup>C NMR (101 MHz, Chloroform-d); *trans* conformer δ / ppm = 170.1 (carbonyl), 169.5 (carbonyl), 91.5 (d, *J* = 182.0 Hz; C<sub>γ</sub>), 55.6 (C<sub>α</sub>), 54.2 (d, *J* = 26.1 Hz; H<sub>δ</sub>), 37.1 (NMe), 36.2 (NMe), 35.7 (d, *J* = 21.6 Hz; C<sub>β</sub>), 22.4 (Ac). Isolated signals of the *cis* conformer δ / ppm = 90.4 (d, *J* = 178.9 Hz; C<sub>γ</sub>), 58.1 (C<sub>α</sub>), 38.0 (d, *J* = 22.2 Hz; C<sub>β</sub>), 22.1 (Ac).

<sup>19</sup>F NMR (565 MHz, Chloroform-d) δ/ppm = -170.96 (s), -172.54 (s).

**<sup>1</sup>H{<sup>19</sup>F} NMR** (600 MHz, Chloroform-d)  $\delta$  / ppm = 5.29 (dq,  $J = 7.7$  Hz, 2.5 Hz, 1H; H $\gamma$ ), 4.95 (dd,  $J = 9.5$  Hz, 2.5 Hz, 1H; H $\alpha$ ), 3.95 (d,  $J = 11.6$  Hz, 1H; H $\delta$ ), 3.89 (dd,  $J = 11.9$  Hz, 5.4 Hz, 1H; H $\delta$ ), 3.07 (s, 3H; NMe<sub>2</sub>), 2.97 (s, 3H; NMe<sub>2</sub>), 2.46 (ddd,  $J = 14.8$  Hz, 9.6 Hz, 5.6 Hz, 1H; H $\beta$ ), 2.24 (d,  $J = 14.3$  Hz, 1H; H $\beta$ ), 2.09 (s, 3H; Ac).

**K<sub>trans/cis</sub>** (400 MHz, Chloroform-d) = 4.3

**HRMS** (ESI):  $m/z$  calcd for C<sub>9</sub>H<sub>15</sub>FN<sub>2</sub>O<sub>2</sub>+H<sup>+</sup>: 203.1190 [M+H]<sup>+</sup>; found: 203.1189 [M+H]<sup>+</sup>.

## 2.8. Ac-(4S)Azp-NMe<sub>2</sub> (3S-NMe<sub>2</sub>)

### Ac-(4S)Azp-OH

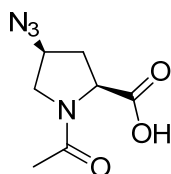

Ac-(4S)Azp-OMe (300 mg, 1.41 mmol) were dissolved in THF (7 ml) and diluted with MeOH (7 ml). NaOH (85 mg, 2.1 mmol in 1.4 ml H<sub>2</sub>O) were added and the reaction mixture was stirred at room temperature for 3 h. The mixture was diluted with CH<sub>2</sub>Cl<sub>2</sub> and washed with HCl (1 M, 30 ml) and brine (30 ml). The combined organic layers were dried over Na<sub>2</sub>SO<sub>4</sub> and concentrated under reduced pressure. The title compound (1.28 mmol, 91 %) was obtained as colorless oil.

Two isomers are visible in the <sup>1</sup>H NMR- and <sup>13</sup>C NMR-spectra in a ratio of 1:2.1 in D<sub>2</sub>O.

**<sup>1</sup>H-NMR** (400 MHz, Deuterium Oxide): δ / ppm (*major*) = 4.49 (dd, *J* = 9.7 Hz, 2.3 Hz 1H; H $\alpha$ ), 4.37 (m, 1H; H $\gamma$ ), 3.74 (dd, *J* = 11.8 Hz, 5.3 Hz, 1H; H $\delta$ ), 3.58-3.52 (m, 1H; H $\delta$ ), 2.50-2.35 (m, 1H; H $\beta$ ), 2.19 (ddd, *J* = 14.2 Hz, 3.7 Hz, 2.4 Hz, 1H; H $\beta$ ), 1.20 (s, 3H; Ac). Isolated signals of the *minor* conformer δ / ppm = 4.63 (dd, *J* = 8.9 Hz, 1.6 Hz, 1H; H $\alpha$ ), 4.33 (m, 1H; H $\gamma$ ), 3.58-3.52 (m, 1H; H $\delta$ ), 3.41 (bd, *J* = 13.2 Hz, 1H; H $\delta$ ), 2.52-2.35 (m, 2H; H $\beta$ ), 1.93 (s, 3H; Ac).

**<sup>13</sup>C-NMR** (101 MHz, CDCl<sub>3</sub>+CD<sub>3</sub>OD): δ / ppm (*major*) = 172.3, 170.5, 59.1, 57.3, 52.5, 34.1, 22.0. Isolated signals of the *minor* conformer δ / ppm = 172.6, 170.5, 58.6, 58.0, 51.2, 36.4, 21.7.

**MS** (ESI, neg): *m/z* (%) = 395.2 [2M-H]<sup>-</sup> (100), 197.3 [M-H]<sup>-</sup> (55), calculated for C<sub>7</sub>H<sub>10</sub>N<sub>4</sub>O<sub>3</sub>.

## Ac-(4S)Azp-NMe<sub>2</sub> (3S-NMe<sub>2</sub>)

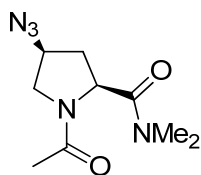

Ac-(4S)Azp-OH (30 mg, 0.15 mmol) was dissolved in CH<sub>2</sub>Cl<sub>2</sub> (500  $\mu$ l) and pentafluorophenol (29 mg, 0.16 mmol) and EDC (43 mg, 0.225 mmol) were added to the solution. The reaction mixture was stirred for 1h at room temperature, diluted with CH<sub>2</sub>Cl<sub>2</sub> and washed with HCl (0.5M). The aqueous phase was extracted with CH<sub>2</sub>Cl<sub>2</sub>, dried over Na<sub>2</sub>SO<sub>4</sub> and concentrated under reduced pressure to obtain the pentafluorophenylester as viscous oil (55 mg, 0.151 mmol, 99 %). The pentafluorophenylester (51 mg, 0.14 mmol) was dissolved in dry CH<sub>2</sub>Cl<sub>2</sub> and treated with NEt<sub>3</sub> (213  $\mu$ l, 1.53 mmol) and dimethylamide hydrochloride (114 mg, 1.40 mmol). The reaction mixture was stirred for 1h at room temperature, diluted with CH<sub>2</sub>Cl<sub>2</sub> and washed with HCl (1M). The organic phase was dried over Na<sub>2</sub>SO<sub>4</sub> and the solvent was removed under reduced pressure. The title compound (25 mg, 78%) was purified by flash chromatography on silica (4%  $\rightarrow$  6% MeOH in CH<sub>2</sub>Cl<sub>2</sub>) and obtained as colourless oil.

<sup>1</sup>H NMR (400 MHz, Deuterium Oxide); *trans* conformer  $\delta$  / ppm = 4.77 ( $\psi$ t,  $J$  = 9.6, 4.5 Hz, 1H; H $\alpha$ ), 4.31 (m, 1H; H $\gamma$ ), 3.84 (dd,  $J$  = 11.5, 6.0 Hz, 1H; H $\delta$ ), 3.52 (dd,  $J$  = 11.5, 3.9 Hz, 1H; H $\delta$ ), 2.97 (s, 3H; NMe), 2.82 (s, 3H; NMe), 2.58 (ddd,  $J$  = 13.9, 9.5, 6.1 Hz, 1H; H $\beta$ ), 1.91 (dt,  $J$  = 13.4, 4.0 Hz, 1H; H $\beta$ ), 1.99 (s, 3H; Ac). Isolated signals of the *cis* conformer  $\delta$  / ppm = 4.94 (dd,  $J$  = 9.5, 2.3 Hz, 1H; H $\alpha$ ), 4.31 (m, 1H; H $\gamma$ ), 3.69 (dd,  $J$  = 13.1, 5.9 Hz, 1H; H $\delta$ ), 3.44 (bd,  $J$  = 13.1 Hz, 1H; H $\delta$ ), 3.00 (s, 3H; NMe), 2.87 (s, 3H; NMe), 2.66 (ddd,  $J$  = 14.1, 9.5, 5.9, 1H; H $\beta$ ), 2.11 (dm,  $J$  = 14.3 Hz, 1H; H $\beta$ ), 1.80 (s, 3H; Ac).

<sup>13</sup>C NMR (101 MHz, Deuterium Oxide); *trans* conformer:  $\delta$  / ppm = 170.6, 168.9, 58.9, 54.7, 52.1, 37.1, 36.0, 34.1, 22.3.

$K_{trans/cis}$  (400 MHz, Deuterium Oxide) = 3.0

<sup>1</sup>H NMR (400 MHz, Chloroform-d); *trans* conformer  $\delta$  / ppm = 4.81 (dd,  $J$  = 8.3, 7.2 Hz, 1H; H $\alpha$ ), 4.18 – 4.05 (m, 1H; H $\gamma$ ), 3.88 (dd,  $J$  = 10.3, 7.1 Hz, 1H; H $\delta$ ), 3.57 (dd,  $J$  = 10.3, 8.1 Hz, 1H; H $\delta$ ), 3.10 (s, 3H; NMe), 2.96 (s, 3H; NMe), 2.55 (dddd,  $J$  = 12.9, 8.1, 7.2, 0.8 Hz, 1H; H $\beta$ ), 2.07 (s, 3H; Ac), 2.03 – 1.92 (m, 1H; H $\beta$ ). Isolated signals of the *cis* conformer  $\delta$  / ppm = 4.62 (dd,  $J$  = 8.9, 4.9 Hz, 1H; H $\alpha$ ), 3.06 (s, 3H; NMe), 3.01 (s, 3H; NMe), 2.74 – 2.64 (m, 1H; H $\beta$ ), 1.88 (s, 3H; Ac).

<sup>13</sup>C NMR (101 MHz, Chloroform-d); *trans* conformer  $\delta$  / ppm = 170.8, 169.0, 58.7, 54.8, 52.2, 37.2, 36.2, 34.3, 22.4.

$K_{trans/cis}$  (400 MHz, Chloroform-d) = 6.5

MS (ESI):  $m/z$  (%) = 248.0 [M+Na]<sup>+</sup>, 473.1 [2M+Na]<sup>+</sup> calcd. for C<sub>9</sub>H<sub>15</sub>N<sub>5</sub>O<sub>2</sub>.



## 2.9. H-Pro-Pro-Asp-NH<sub>2</sub> ·TFA (4)

### H-Pro-Pro-Asp-NH<sub>2</sub> ·TFA (4)

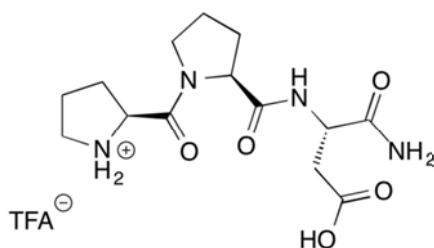

H-Pro-Pro-Asp-NH<sub>2</sub> ·TFA (**4**) was purchased from Bachem and used without further purification. The analytical data is in agreement with published data.<sup>[3]</sup>

<sup>1</sup>H NMR (600 MHz, CDCl<sub>3</sub>:CD<sub>3</sub>OH 9:1); *trans* conformer  $\delta$ /ppm = 8.00 (d,  $J$  = 8.3 Hz, 1H; D3-HN), 7.11 (s, 1H; NH<sub>2</sub>), 6.45 (s, 1H; NH<sub>2</sub>), 4.67-4.61 (m, 2H, H $\alpha$ ), 4.49 (dd,  $J$  = 8.2, 5.3 Hz, 1H; H $\alpha$ ), 3.71-3.67 (m, 1H; H $\delta$ ), 3.58-3.54 (m, 1H; H $\delta$ ), 3.41-3.38 (m, 2H; H $\delta$ ), 2.94 (dd,  $J$  = 17.0, 5.6 Hz, 1H; E3-H $\beta$ ), 2.75 (dd,  $J$  = 17.1, 5.6 Hz, 1H; E3-H $\beta$ ), 2.52-2.46 (m, 1H; H $\beta$ ), 2.26-2.22 (m, 1H, H $\beta$ ), 2.15-2.01 (m, 6H, H $\beta$ /H $\gamma$ ). Isolated signals of the *cis* conformer  $\delta$ /ppm 8.69 (d,  $J$  = 8.1 Hz, 1H, D3-HN), 7.49 (s, 1H; NH<sub>2</sub>), 6.40 (d,  $J$  = 0.2 Hz, 1H; NH<sub>2</sub>), 4.80 (ddd,  $J$  = 9.2, 8.2, 4.7 Hz, 1H; H $\alpha$ ), 4.46 (dd,  $J$  = 8.5, 3.1 Hz, 1H; H $\alpha$ ), 4.24 (dd,  $J$  = 8.5, 6.9 Hz, 1H; H $\alpha$ ), 3.74-3.71 (m, 1H; H $\delta$ ), 3.54-3.52 (m, 1H; H $\delta$ ), 3.45-3.42 (m, 2H, H $\delta$ ), 2.87 (dd,  $J$  = 16.0, 4.7 Hz, 1H; E3-H $\beta$ ), 2.39-2.33 (m, 1H; H $\beta$ ), 1.99-1.90 (m, 3H; H $\beta$ /H $\gamma$ ).

<sup>13</sup>C NMR (151 MHz, CDCl<sub>3</sub>:CD<sub>3</sub>OH 9:1); *trans* conformer  $\delta$ /ppm 174.00 (CO), 173.90 (CO), 171.71 (CO), 168.50 (CO), 61.24 (C $\alpha$ ), 58.93 (C $\alpha$ ), 49.70 (C $\alpha$ ), 47.60 (C $\delta$ ), 46.64 (C $\delta$ ), 35.58 (E3-C $\beta$ ), 28.87 (C $\beta$ ), 28.84 (C $\beta$ ), 25.18 (C $\gamma$ ), 24.54 (C $\gamma$ ). *cis* conformer 173.94 (CO), 173.74 (CO), 171.93 (CO), 167.91 (CO), 60.13 (C $\alpha$ ), 58.89 (C $\alpha$ ), 50.41 (C $\alpha$ ), 47.90 (C $\delta$ ), 46.98 (C $\delta$ ), 36.80 (E3-C $\beta$ ), 32.11 (C $\beta$ ), 29.24 (C $\beta$ ), 24.51 (C $\gamma$ ), 22.46 (C $\gamma$ ).

$K_{trans/cis}$  (600 MHz, CDCl<sub>3</sub>:CD<sub>3</sub>OH 9:1) = 6.0

<sup>1</sup>H NMR (600 MHz, DMSO-d<sub>6</sub>); *trans* conformer  $\delta$ /ppm = 8.11 (d,  $J$  = 8.0 Hz, 1H; E3-HN), 7.12 (s, 1H; NH<sub>2</sub>), 7.10 (s, 1H; NH<sub>2</sub>), 4.48 (t,  $J$  = 6.7 Hz, 1H; H $\alpha$ ), 4.44-4.40 (m, 1H; H $\alpha$ ), 4.36 (dd,  $J$  = 8.5, 5.1 Hz, 1H; H $\alpha$ ), 3.65-3.61 (m, 1H; H $\delta$ ), 3.49-3.44 (m, 1H; H $\delta$ ), 3.27-3.22 (m, 1H; H $\delta$ ), 3.19-3.15 (m, 1H; H $\delta$ ), 2.65 (dd,  $J$  = 16.4, 6.2 Hz, 1H; E3-H $\beta$ ), 2.53-2.50 (overlapp, 1H; E3-H $\beta$ ), 2.43-2.36 (m, 1H; H $\beta$ ), 2.15-2.09 (m, 1H; H $\beta$ ), 1.98-1.85 (m, 6H; H $\beta$ /H $\gamma$ ). Isolated signals of the *cis* conformer  $\delta$ /ppm = 8.57 (d,  $J$  = 8.0 Hz, 1H; E3-HN), 7.40 (s, 1H; NH<sub>2</sub>), 7.15 (s, 1H; NH<sub>2</sub>), 4.53 (td,  $J$  = 8.2, 5.4 Hz, 1H; H $\alpha$ ), 3.94 (t,  $J$  = 8.2 Hz, 1H, H $\alpha$ ), 3.51 (td,  $J$  = 12.5, 6.5 Hz, 1H; H $\delta$ ), 2.73 (dd,  $J$  = 16.4, 5.4 Hz, 1H; E3-H $\beta$ ), 2.57 (dd,  $J$  = 16.4, 8.5 Hz, 1H; E3-H $\beta$ ), 2.25 (dq,  $J$  = 12.6, 8.5 Hz, 1H; H $\beta$ ), 2.07-2.03 (m, 1H; H $\beta$ ), 1.84-1.74 (m, 3H; H $\beta$ /H $\gamma$ ).

**<sup>13</sup>C NMR** (151 MHz; DMSO-d<sub>6</sub>): *trans* conformer δ/ppm = 172.06 (CO), 171.75 (CO), 170.54 (CO), 166.90 (CO), 59.87 (Cα), 58.20 (Cα), 49.20 (Cα), 46.72 (Cδ), 45.73 (Cδ), 35.88 (E3-Cβ), 28.78 (Cβ), 27.79 (Cβ), 24.34, 23.39. *cis* conformer δ/ppm = 171.84 (CO), 171.79 (CO), 170.49 (CO), 166.52 (CO), 58.74 (Cα), 58.35 (Cα), 49.35 (Cα), 47.28 (Cδ), 45.38 (Cδ), 36.02 (E3-Cβ), 31.48 (Cβ), 27.70 (Cβ), 23.40 (Cγ), 21.85 (Cγ).

**K<sub>trans/cis</sub>** (600 MHz, DMSO-d<sub>6</sub>) = 3.4

### 3. Quantum Chemical Calculations of Methylesters and Dimethylamides of Proline Derivatives

All geometries were optimized at the PBE0-D3<sup>4,5</sup>/def2-TZVP<sup>6</sup> level of theory. The thermal corrections to the Gibbs free energy at 298.15 K were calculated for all minima from unscaled vibrational frequencies obtained at the same level. The dipole moments were obtained at the same level of theory. The thermal corrections to the Gibbs free energy were combined with single point energies calculated at the RI-MP2/def2-QZVP//PBE0-D3/def2-TZVP level to yield Gibbs free energies ( $G_{298}$ ) at 298.15 K. The implicit solvation model COSMO<sup>7</sup> was exploited for solvent effects consideration. The dipole moments of all systems were calculated as Boltzmann-averaged values over all available conformers, relying on the Gibbs free energies. All quantum mechanical calculations were performed with the Turbomole program package (versions 6.3.1 and 6.6)<sup>8</sup>.

#### 3.1. Gibbs free energies and dipole moments of Ac-Pro-OMe (1-OMe) and Ac-Pro-NMe<sub>2</sub> (1-NMe<sub>2</sub>)

**Table 1** Relative free energies  $\Delta G$ , dipole moments  $\mu$  [D] and Boltzmann distribution averaged dipole moments of *trans*, *cis*, *endo* and *exo* conformers of Ac-Pro-OMe (**1-OMe**) and Ac-Pro-NMe<sub>2</sub> (**1-NMe<sub>2</sub>**). Calculated with CHCl<sub>3</sub> as solvent at the PBE0-D3-COSMO/def2-TZVP level of theory.

|                                                                                                           | Ac-Pro-OMe ( <b>1-OMe</b> ) |      |            |      | Ac-Pro-NMe <sub>2</sub> ( <b>1-NMe<sub>2</sub></b> ) |      |            |      |
|-----------------------------------------------------------------------------------------------------------|-----------------------------|------|------------|------|------------------------------------------------------|------|------------|------|
|                                                                                                           | <i>endo</i>                 |      | <i>exo</i> |      | <i>endo</i>                                          |      | <i>exo</i> |      |
| <b><i>trans</i></b>                                                                                       |                             |      |            |      |                                                      |      |            |      |
| $\Psi$ (N <sub>r</sub> -C <sub>i</sub> <sup>α</sup> -C <sub>r</sub> -OCH <sub>3</sub> /NMe <sub>2</sub> ) | 156°                        | -25° | 144°       | -36° | 159°                                                 | -18° | 133°       | -40° |
| $\Delta G$ [kJ/mol]                                                                                       | 0.0                         | 2.6  | 1.5        | 3.3  | 0.0                                                  | 18.9 | 3.2        | 12.8 |
| (RI-MP2-COSMO/def2-QZVP//PBE0-D3-COSMO/def2-TZVP)                                                         |                             |      |            |      |                                                      |      |            |      |
| $\mu$ [D]                                                                                                 | 5.02                        | 6.87 | 5.02       | 6.95 | 5.57                                                 | 8.12 | 4.64       | 8.56 |
| PBE0-D3-COSMO/def2-TZVP                                                                                   |                             |      |            |      |                                                      |      |            |      |
| $\mu_{\text{endo}}$ (RI-MP2)"BOLTZMANN"                                                                   | 5.50                        |      |            |      | 5.57                                                 |      |            |      |
| $\mu_{\text{exo}}$ (RI-MP2)"BOLTZMANN"                                                                    |                             |      | 5.64       |      |                                                      |      | 4.72       |      |
| $\mu_{\text{ALL}}$ (RI-MP2)"BOLTZMANN"                                                                    | 5.55                        |      |            |      | 5.38                                                 |      |            |      |
| <b><i>cis</i></b>                                                                                         |                             |      |            |      |                                                      |      |            |      |
| $\Psi$ (N <sub>r</sub> -C <sub>i</sub> <sup>α</sup> -C <sub>r</sub> -OCH <sub>3</sub> /NMe <sub>2</sub> ) | 166°                        | -16° | 157°       | -31° | 167°                                                 | -16° | 161°       | -39° |
| $\Delta G$ [kJ/mol]                                                                                       | 0.0                         | 1.4  | 3.1        | 4.5  | 0.0                                                  | 13.9 | 3.1        | 8.1  |
| (RI-MP2-COSMO/def2-QZVP//PBE0-D3-COSMO/def2-TZVP)                                                         |                             |      |            |      |                                                      |      |            |      |
| $\mu$ [D]                                                                                                 | 7.01                        | 3.45 | 6.96       | 3.83 | 9.44                                                 | 3.10 | 9.45       | 4.21 |
| PBE0-D3-COSMO/def2-TZVP                                                                                   |                             |      |            |      |                                                      |      |            |      |
| $\mu_{\text{endo}}$ (RI-MP2)"BOLTZMANN"                                                                   | 5.72                        |      |            |      | 9.41                                                 |      |            |      |
| $\mu_{\text{exo}}$ (RI-MP2)"BOLTZMANN"                                                                    |                             |      | 5.82       |      |                                                      |      | 8.84       |      |
| $\mu_{\text{ALL}}$ (RI-MP2)"BOLTZMANN"                                                                    | 5.74                        |      |            |      | 9.27                                                 |      |            |      |
| <b><math>\Delta \mu_{\text{cis-trans}}</math> [D]</b>                                                     |                             |      |            |      |                                                      |      |            |      |
| <i>endo</i> (RI-MP2)"BOLTZMANN"                                                                           | 0.22                        |      |            |      | 3.84                                                 |      |            |      |
| <i>exo</i> (RI-MP2)"BOLTZMANN"                                                                            |                             |      | 0.18       |      |                                                      |      | 4.12       |      |
| ALL (RI-MP2)"BOLTZMANN"                                                                                   | 0.19                        |      |            |      | 3.89                                                 |      |            |      |

### 3.2. Indicators for the $n \rightarrow \pi^*$ Interaction in Ac-Pro-OMe (1-OMe) and Ac-Pro-OMe (1-NMe<sub>2</sub>)

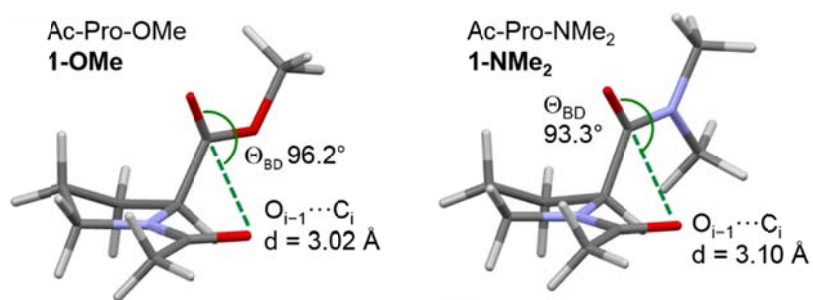

**Figure 1** Distances and angles within Ac-Pro-OMe (**1-OMe**) and Ac-Pro-NMe<sub>2</sub> (**1-NMe<sub>2</sub>**). Pyramidalization at CO<sub>2</sub>Me = 0.020 Å, at CONMe<sub>2</sub> = 0.017 Å.

### 3.3. Gibbs free energies and dipole moments of Ac-(4*R*)Flp-OMe (2*R*-OMe) and Ac-(4*R*)Flp-NMe<sub>2</sub> (2*R*-NMe<sub>2</sub>)

**Table 2** Relative free energies  $\Delta G$ , dipole moments  $\mu$  [D] and Boltzmann distribution averaged dipole moments of *trans*, *cis*, *endo* and *exo* conformers of Ac-(4*R*)Flp-OMe (2*R*-OMe) and Ac-(4*R*)Flp-NMe<sub>2</sub> (2*R*-NMe<sub>2</sub>). Calculated with CHCl<sub>3</sub> as solvent at the PBE0-D3-COSMO/def2-TZVP level of theory.

|                                                                                                           | Ac-(4 <i>R</i> )Flp-OMe (2 <i>R</i> -OMe) |      |             |      | Ac-(4 <i>R</i> )Flp-NMe <sub>2</sub> (2 <i>R</i> -NMe <sub>2</sub> ) |      |             |      |
|-----------------------------------------------------------------------------------------------------------|-------------------------------------------|------|-------------|------|----------------------------------------------------------------------|------|-------------|------|
|                                                                                                           | <i>exo</i>                                |      | <i>endo</i> |      | <i>exo</i>                                                           |      | <i>endo</i> |      |
| <b><i>trans</i></b>                                                                                       |                                           |      |             |      |                                                                      |      |             |      |
| $\Psi$ (N <sub>i</sub> -C <sub>i</sub> <sup>α</sup> -C <sub>i</sub> -OCH <sub>3</sub> /NMe <sub>2</sub> ) | 143°                                      | -36° | 153°        | -29° | 131°                                                                 | -40° | 131°        | -20° |
| $\Delta G$ [kJ/mol]                                                                                       | 0.0                                       | 2.5  | 8.0         | 10.4 | 0.0                                                                  | 12.2 | 8.0         | 27.8 |
| (RI-MP2-COSMO/def2-QZVP//PBE0-D3-COSMO/def2-TZVP)                                                         |                                           |      |             |      |                                                                      |      |             |      |
| $\mu$ [D]                                                                                                 | 4.26                                      | 7.30 | 2.42        | 5.04 | 2.83                                                                 | 9.22 | 2.42        | 6.84 |
| PBE0-D3-COSMO/def2-TZVP                                                                                   |                                           |      |             |      |                                                                      |      |             |      |
| $\mu_{\text{exo}}$ (RI-MP2)"BOLTZMANN"                                                                    | <b>5.07</b>                               |      |             |      | <b>2.88</b>                                                          |      |             |      |
| $\mu_{\text{ALL}}$ (RI-MP2)"BOLTZMANN"                                                                    |                                           |      | 5.00        |      |                                                                      |      | 2.86        |      |
| <b><i>cis</i></b>                                                                                         |                                           |      |             |      |                                                                      |      |             |      |
| $\Psi$ (N <sub>i</sub> -C <sub>i</sub> <sup>α</sup> -C <sub>i</sub> -OCH <sub>3</sub> /NMe <sub>2</sub> ) | 156°                                      | -32° | 165°        | -22° | 160°                                                                 | -39° | 165°        | -17° |
| $\Delta G$ [kJ/mol]                                                                                       | 0.0                                       | 1.5  | 7.2         | 8.2  | 0.0                                                                  | 8.1  | 7.4         | 24.1 |
| (RI-MP2-COSMO/def2-QZVP//PBE0-D3-COSMO/def2-TZVP)                                                         |                                           |      |             |      |                                                                      |      |             |      |
| $\mu$ [D]                                                                                                 | 6.67                                      | 4.75 | 7.13        | 3.47 | 8.96                                                                 | 5.67 | 9.57        | 3.35 |
| PBE0-D3-COSMO/def2-TZVP                                                                                   |                                           |      |             |      |                                                                      |      |             |      |
| $\mu_{\text{exo}}$ (RI-MP2)"BOLTZMANN"                                                                    | <b>6.00</b>                               |      |             |      | <b>8.84</b>                                                          |      |             |      |
| $\mu_{\text{ALL}}$ (RI-MP2)"BOLTZMANN"                                                                    |                                           |      | 5.98        |      |                                                                      |      | 8.88        |      |
| <b><math>\Delta \mu_{\text{cis-trans}}</math> [D]</b>                                                     |                                           |      |             |      |                                                                      |      |             |      |
| <i>exo</i> (RI-MP2)"BOLTZMANN"                                                                            | <b>0.93</b>                               |      |             |      | <b>5.96</b>                                                          |      |             |      |
| ALL (RI-MP2)"BOLTZMANN"                                                                                   |                                           |      | <b>0.98</b> |      |                                                                      |      | <b>6.01</b> |      |

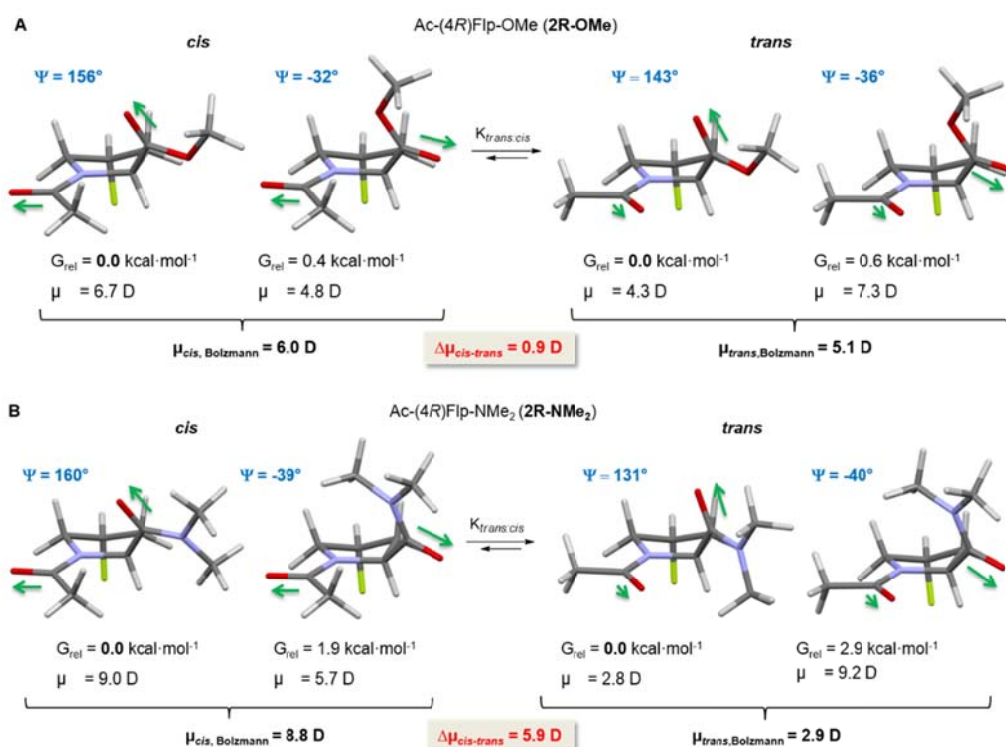

**Figure 2** Lowest energy structures and Boltzmann distribution averaged dipole moments  $\mu$  [D] of *trans* and *cis* conformers of Ac-(4*R*)Flp-OMe (2*R*-OMe) and Ac-(4*R*)Flp-NMe<sub>2</sub> (2*R*-NMe<sub>2</sub>) calculated with CHCl<sub>3</sub> as solvent at the PBE0-D3-COSMO/def2-TZVP level of theory.

### 3.4. Gibbs free energies and dipole moments of Ac-(4*R*)Azp-OMe (3R-OMe) and Ac-(4*R*)Azp-NMe<sub>2</sub> (3R-NMe<sub>2</sub>)

**Table 3** Relative free energies  $\Delta G$ , dipole moments  $\mu$  [D] and Boltzmann distribution averaged dipole moments of *exo* puckered *trans* and *cis* conformers of Ac-(4*R*)Azp-OMe (**3R-OMe**) considering the C<sup>δ</sup>-C<sup>γ</sup>-N-N torsion. Calculated with CHCl<sub>3</sub> as solvent at the PBE0-D3-COSMO/def2-TZVP level of theory.

| Ac-(4 <i>R</i> )Azp-OMe ( <b>3R-OMe</b> ) <i>exo</i>                                    |               |               |               |               |               |               |
|-----------------------------------------------------------------------------------------|---------------|---------------|---------------|---------------|---------------|---------------|
| <b><i>trans</i></b>                                                                     |               |               |               |               |               |               |
| $\Psi$ (N <sub>i</sub> -C <sub>i</sub> <sup>α</sup> -C <sub>i</sub> -OCH <sub>3</sub> ) | <b>143.8°</b> | <b>143.5°</b> | <b>145.1°</b> | <b>-34.9°</b> | <b>-35.2°</b> | <b>-34.3°</b> |
| $\Delta G$ [kJ/mol]<br>(RI-MP2-COSMO/def2-QZVP//PBE0-D3-COSMO/def2-TZVP)                | 0.0           | 0.8           | 2.1           | 2.7           | 3.1           | 5.2           |
| $\mu$ [D]<br>PBE0-D3-COSMO/def2-TZVP                                                    | 4.11          | 4.17          | 4.63          | 7.46          | 7.17          | 7.67          |
| C <sup>δ</sup> -C <sup>γ</sup> -N-N torsion                                             | -178.0°       | 65.9°         | -31.6°        | -178.3°       | 65.8°         | -26.3°        |
| $\mu_{\text{ALL}}$ (RI-MP2) "BOLTZMANN"                                                 | <b>5.05</b>   |               |               |               |               |               |
| <b><i>cis</i></b>                                                                       |               |               |               |               |               |               |
| $\Psi$ (N <sub>i</sub> -C <sub>i</sub> <sup>α</sup> -C <sub>i</sub> -OCH <sub>3</sub> ) | <b>156.9°</b> | <b>-31.3°</b> | <b>156.7°</b> | <b>-31.1°</b> | <b>166.0°</b> | <b>-30.5°</b> |
| $\Delta G$ [kJ/mol]<br>(RI-MP2-COSMO/def2-QZVP//PBE0-D3-COSMO/def2-TZVP)                | 0.0           | 1.1           | 0.4           | 1.6           | 1.9           | 2.2           |
| $\mu$ [D]<br>PBE0-D3-COSMO/def2-TZVP                                                    | 7.06          | 5.17          | 6.34          | 4.73          | 7.14          | 5.35          |
| C <sup>δ</sup> -C <sup>γ</sup> -N-N torsion                                             | 66.1°         | 66.1°         | -179.9°       | -179.8°       | -68.2°        | -36.5°        |
| $\mu_{\text{ALL}}$ (RI-MP2) "BOLTZMANN"                                                 | <b>6.11</b>   |               |               |               |               |               |
| $\Delta \mu_{\text{cis-trans}}$ [D]                                                     | <b>1.06</b>   |               |               |               |               |               |

**Table 4** Relative free energies, dipole moments  $\mu$  [D] and Boltzmann distribution averaged dipole moments of *exo* puckered *trans* and *cis* conformers of Ac-(4*R*)Azp-NMe<sub>2</sub> (**3R-NMe<sub>2</sub>**) considering the C<sup>δ</sup>-C<sup>γ</sup>-N-N torsion. Calculated with CHCl<sub>3</sub> as solvent at the PBE0-D3-COSMO/def2-TZVP level of theory.

| Ac-(4 <i>R</i> )Azp-NMe <sub>2</sub> ( <b>3R-NMe<sub>2</sub></b> ) <i>exo</i>           |        |         |        |             |         |        |
|-----------------------------------------------------------------------------------------|--------|---------|--------|-------------|---------|--------|
| <b><i>trans</i></b>                                                                     |        |         |        |             |         |        |
| $\Psi$ (N <sub>r</sub> -C <sub>i</sub> <sup>α</sup> -C <sub>r</sub> -NMe <sub>2</sub> ) | 131.2° | 131.3°  | 131.4° | -39.0°      | -39.3°  | -39.0° |
| ΔG [kJ/mol]<br>(RI-MP2-COSMO/def2-QZVP//PBE0<br>-D3-COSMO/def2-TZVP)                    | 0.0    | 0.3     | 1.0    | 13.4        | 14.1    | 16.2   |
| μ [D]<br>PBE0-D3-COSMO/def2-TZVP                                                        | 2.53   | 2.23    | 2.71   | 9.44        | 9.11    | 9.64   |
| C <sup>δ</sup> -C <sup>γ</sup> -N-N torsion                                             | -73.5° | -176.4° | 65.2°  | -178.1°     | 66.0°   | -26.1° |
| μ <sub>ALL</sub> (RI-MP2) "BOLTZMANN"                                                   |        |         |        | 2.50        |         |        |
| <b><i>cis</i></b>                                                                       |        |         |        |             |         |        |
| $\Psi$ (N <sub>r</sub> -C <sub>i</sub> <sup>α</sup> -C <sub>r</sub> -NMe <sub>2</sub> ) | 159.8° | 160.4°  | 165.6° | -38.2°      | -37.9°  | -37.9° |
| ΔG [kJ/mol]<br>(RI-MP2-COSMO/def2-QZVP//PBE0<br>-D3-COSMO/def2-TZVP)                    | 0.0    | 1.0     | 2.7    | 7.6         | 8.0     | 10.5   |
| μ [D]<br>PBE0-D3-COSMO/def2-TZVP                                                        | 9.23   | 8.45    | 9.16   | 6.04        | 5.84    | 6.39   |
| C <sup>δ</sup> -C <sup>γ</sup> -N-N torsion                                             | 65.6°  | -178.2° | -74.2° | 66.4°       | -179.7° | -29.4° |
| μ <sub>ALL</sub> (RI-MP2) "BOLTZMANN"                                                   |        |         |        | 8.82        |         |        |
| Δ μ <sub>cis-trans</sub> [D]                                                            |        |         |        | <b>6.32</b> |         |        |

**Table 5** Relative free energies ΔG and dipole moments μ [D] averaged dipole moments of *endo* puckered *trans* and *cis* conformers of Ac-(4*R*)Azp-OMe (**3R-OMe**) considering the C<sup>δ</sup>-C<sup>γ</sup>-N-N torsion. Calculated with CHCl<sub>3</sub> as solvent at the PBE0-D3-COSMO/def2-TZVP level of theory.

| Ac-(4 <i>R</i> )Azp-OMe ( <b>3R-OMe</b> ) <i>endo</i>                                   |        |        |        |        |        |        |
|-----------------------------------------------------------------------------------------|--------|--------|--------|--------|--------|--------|
| <b><i>trans</i></b>                                                                     |        |        |        |        |        |        |
| $\Psi$ (N <sub>r</sub> -C <sub>i</sub> <sup>α</sup> -C <sub>r</sub> -OCH <sub>3</sub> ) | 152.4° | 152.0° | 152.5° | -27.9° | -28.3° | -28°   |
| ΔG [kJ/mol]<br>(RI-MP2-COSMO/def2-QZVP//PBE0<br>-D3-COSMO/def2-TZVP)                    | 4.7    | 5.0    | 6.8    | 6.8    | 7.6    | 9.1    |
| μ [D]<br>PBE0-D3-COSMO/def2-TZVP                                                        | 1.99   | 2.14   | 1.93   | 4.75   | 4.47   | 4.84   |
| C <sup>δ</sup> -C <sup>γ</sup> -N-N torsion                                             | 159.7  | 93.3   | -62.4  | 160.6  | 92.6   | -62.6  |
| <b><i>cis</i></b>                                                                       |        |        |        |        |        |        |
| $\Psi$ (N <sub>r</sub> -C <sub>i</sub> <sup>α</sup> -C <sub>r</sub> -OCH <sub>3</sub> ) | 163.8° | 164.3° | -20.7° | -19.8° | 164.5° | -20.0° |
| ΔG [kJ/mol]<br>(RI-MP2-COSMO/def2-QZVP//PBE0<br>-D3-COSMO/def2-TZVP)                    | 3.5    | 3.7    | 5.0    | 5.0    | 5.7    | 6.9    |
| μ [D]<br>PBE0-D3-COSMO/def2-TZVP                                                        | 7.39   | 6.99   | 3.59   | 3.27   | 7.27   | 3.85   |
| C <sup>δ</sup> -C <sup>γ</sup> -N-N torsion                                             | 88.9   | 159.9  | 89.1   | 160.1  | -60.5  | -60.7  |

**Table 6** Relative free energies  $\Delta G$  and dipole moments  $\mu$  [D] of *endo* puckered *trans* and *cis* conformers of Ac-(4*R*)Azp-NMe<sub>2</sub> (**3R-NMe<sub>2</sub>**) considering the C<sup>δ</sup>-C<sup>γ</sup>-N-N torsion. Calculated with CHCl<sub>3</sub> as solvent at the PBE0-D3-COSMO/def2-TZVP level of theory.

| Ac-(4 <i>R</i> )Azp-NMe <sub>2</sub> ( <b>3R-NMe<sub>2</sub></b> ) <i>endo</i>          |               |               |               |               |               |               |
|-----------------------------------------------------------------------------------------|---------------|---------------|---------------|---------------|---------------|---------------|
| <b><i>trans</i></b>                                                                     |               |               |               |               |               |               |
| $\Psi$ (N <sub>i</sub> -C <sub>i</sub> <sup>α</sup> -C <sub>i</sub> -NMe <sub>2</sub> ) | <b>131.5°</b> | <b>132.6°</b> | <b>-17.1°</b> | <b>-16.8°</b> |               |               |
| $\Delta G$ [kJ/mol]<br>(RI-MP2-COSMO/def2-QZVP//PBE0-D3-COSMO/def2-TZVP)                | 5.5           | 7.0           | 25.5          | 26.9          |               |               |
| $\mu$ [D]<br>PBE0-D3-COSMO/def2-TZVP                                                    | 2.78          | 2.36          | 6.26          | 6.73          |               |               |
| C <sup>δ</sup> -C <sup>γ</sup> -N-N torsion                                             | 157.8         | -62.3         | 92.8          | -63.3         |               |               |
| <b><i>cis</i></b>                                                                       |               |               |               |               |               |               |
| $\Psi$ (N <sub>i</sub> -C <sub>i</sub> <sup>α</sup> -C <sub>i</sub> -NMe <sub>2</sub> ) | <b>165.5°</b> | <b>165.7°</b> | <b>165.7°</b> | <b>-14.1°</b> | <b>-14.5°</b> | <b>-14.2°</b> |
| $\Delta G$ [kJ/mol]<br>(RI-MP2-COSMO/def2-QZVP//PBE0-D3-COSMO/def2-TZVP)                | 4.3           | 4.4           | 6.4           | 20.0          | 20.4          | 22.8          |
| $\mu$ [D]<br>PBE0-D3-COSMO/def2-TZVP                                                    | 9.86          | 9.43          | 9.63          | 3.23          | 3.26          | 3.88          |
| C <sup>δ</sup> -C <sup>γ</sup> -N-N torsion                                             | 88.9          | 159.8         | -60.5         | 162.9         | 89.2          | -61.6         |

**Table 7** Boltzmann averaged differences in dipole moments  $\Delta \mu_{cis-trans}$  [D] for the *exo* puckered conformations as well as over all *exo* and *endo* conformations.

| $\Delta \mu_{cis-trans}$ [D]   | Ac-(4 <i>R</i> )Azp-OMe ( <b>3R-OMe</b> ) | Ac-(4 <i>R</i> )Azp-NMe <sub>2</sub> ( <b>3R-NMe<sub>2</sub></b> ) |
|--------------------------------|-------------------------------------------|--------------------------------------------------------------------|
| <i>exo</i> (RI-MP2)"BOLTZMANN" | <b>1.06</b>                               | <b>6.32</b>                                                        |
| ALL (RI-MP2) "BOLTZMANN"       | <b>1.34</b>                               | <b>6.44</b>                                                        |



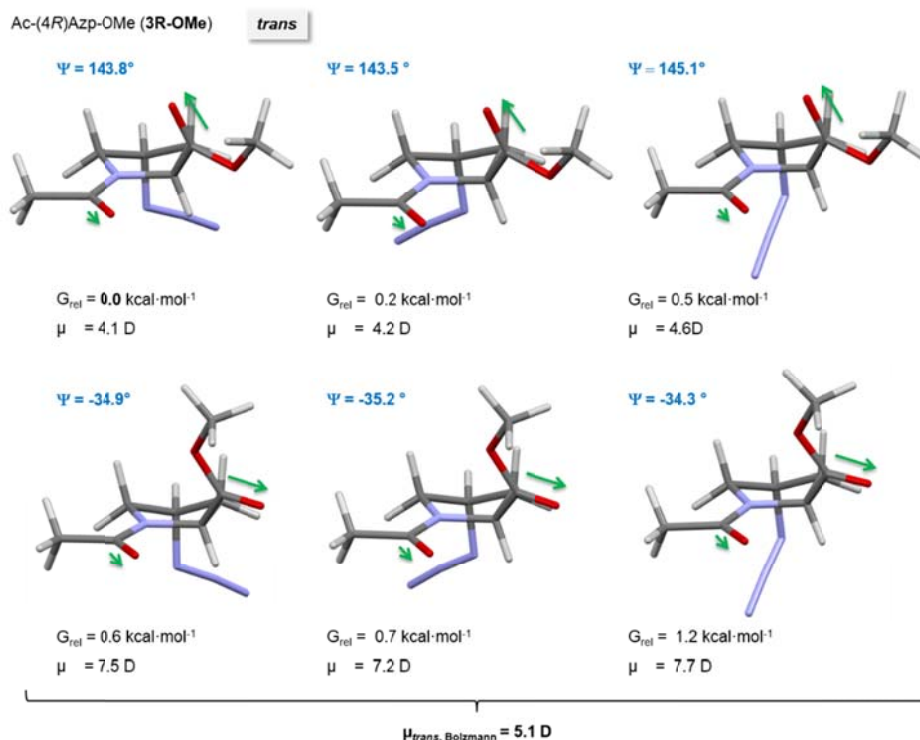

**Figure 3** Lowest energy structures and Boltzmann distribution averaged dipole moments  $\mu$  [D] of *trans* conformers of Ac-(4R)Azp-OMe (3R-OMe) calculated with  $\text{CHCl}_3$  as solvent at the PBE0-D3-COSMO/def2-TZVP level of theory.

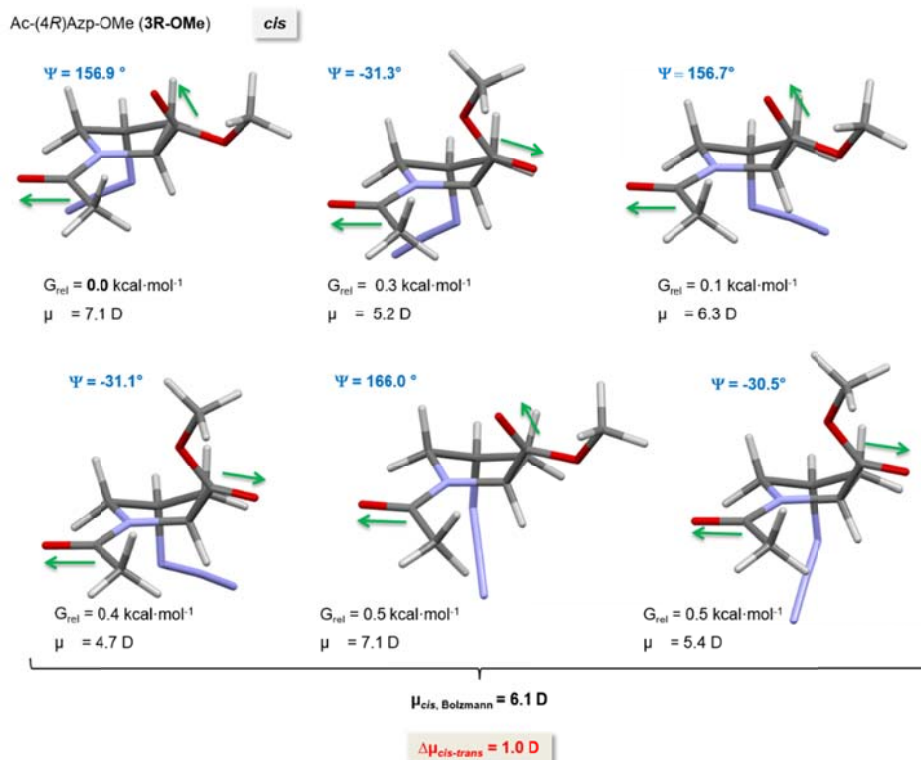

**Figure 4** Lowest energy structures and Boltzmann distribution averaged dipole moments  $\mu$  [D] of *cis* conformers of Ac-(4R)Azp-OMe (3R-OMe) calculated with  $\text{CHCl}_3$  as solvent at the PBE0-D3-COSMO/def2-TZVP level of theory.

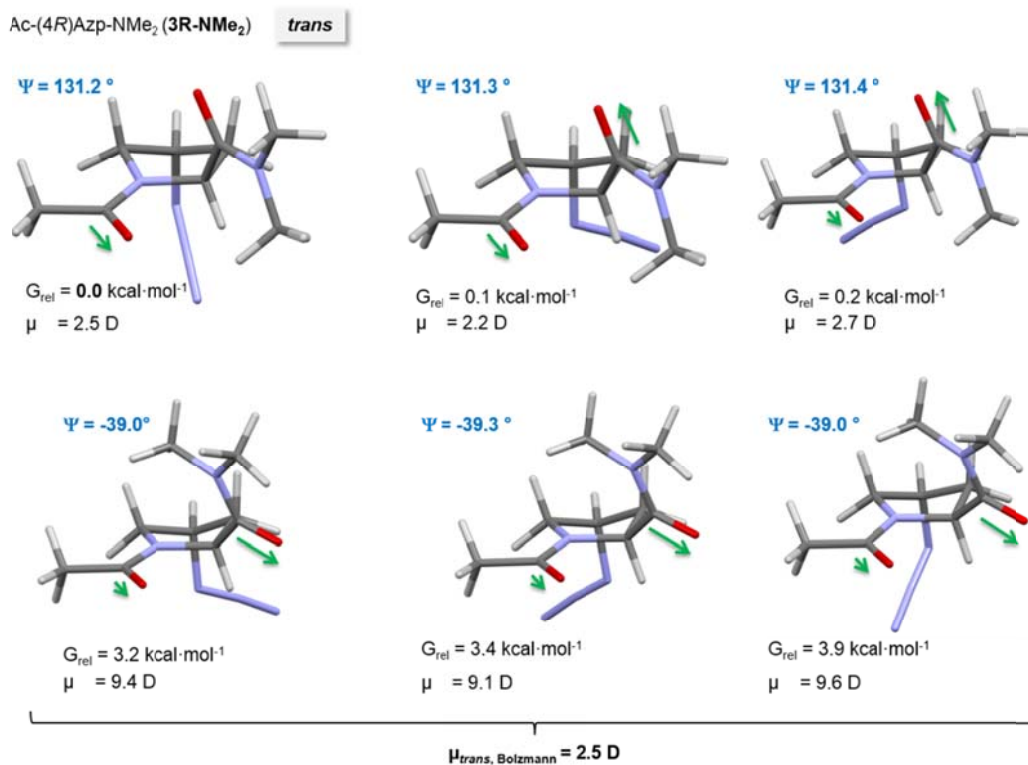

**Figure 5** Lowest energy structures and Boltzmann distribution averaged dipole moments  $\mu$  [D] of *trans* conformers of Ac-(4*R*)Azp-NMe<sub>2</sub> (3*R*-NMe<sub>2</sub>) calculated with CHCl<sub>3</sub> as solvent at the PBE0-D3-COSMO/def2-TZVP level of theory.

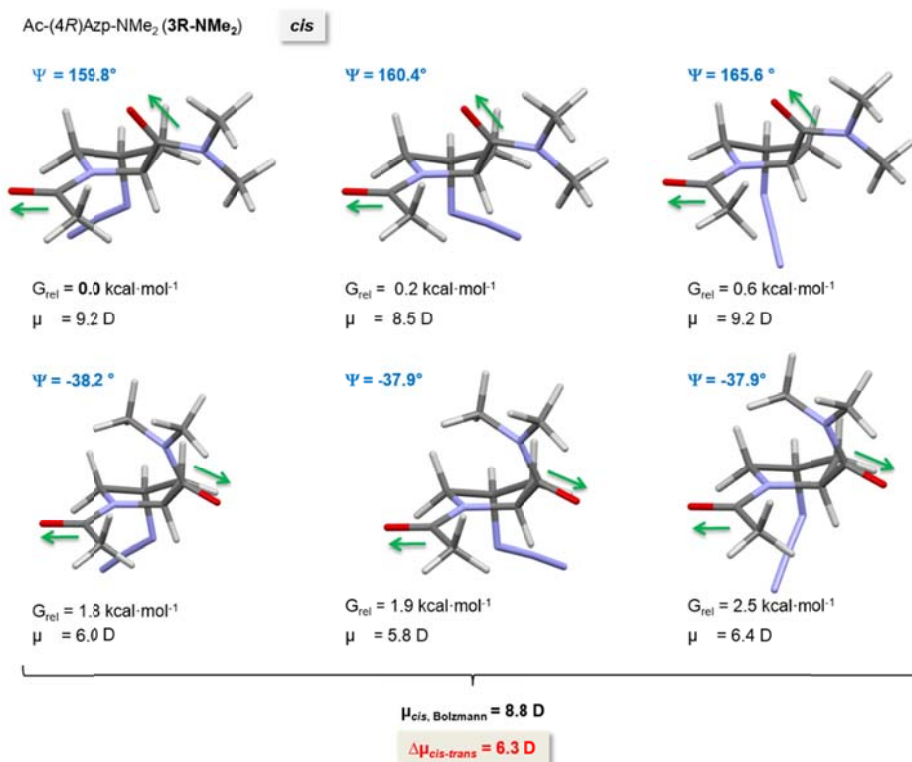

**Figure 6** Lowest energy structures and Boltzmann distribution averaged dipole moments  $\mu$  [D] of *cis* conformers of Ac-(4*R*)Azp-NMe<sub>2</sub> (3*R*-NMe<sub>2</sub>) calculated with CHCl<sub>3</sub> as solvent at the PBE0-D3-COSMO/def2-TZVP level of theory.

### 3.5. Gibbs free energies and dipole moments of Ac-(4S)Flp-OMe (2S-OMe) and Ac-(4S)Flp-NMe<sub>2</sub> (2S-NMe<sub>2</sub>)

**Table 8** Relative free energies  $\Delta G$ , dipole moments  $\mu$  [D] and Boltzmann distribution averaged dipole moments of *trans*, *cis*, *endo* and *exo* conformers of Ac-(4S)Flp-OMe (**2S-OMe**) and Ac-(4S)Flp-NMe<sub>2</sub> (**2S-NMe<sub>2</sub>**). Calculated with CHCl<sub>3</sub> as solvent at the PBE0-D3-COSMO/def2-TZVP level of theory.

|                                                                                                           | Ac-(4S)Flp-OMe ( <b>2S-OMe</b> ) |      |            |      | Ac-(4S)Flp-NMe <sub>2</sub> ( <b>2S-NMe<sub>2</sub></b> ) |      |            |      |
|-----------------------------------------------------------------------------------------------------------|----------------------------------|------|------------|------|-----------------------------------------------------------|------|------------|------|
|                                                                                                           | <i>endo</i>                      |      | <i>exo</i> |      | <i>endo</i>                                               |      | <i>exo</i> |      |
| <b><i>trans</i></b>                                                                                       |                                  |      |            |      |                                                           |      |            |      |
| $\Psi$ (N <sub>F</sub> -C <sub>i</sub> <sup>α</sup> -C <sub>F</sub> -OCH <sub>3</sub> /NMe <sub>2</sub> ) | 173°                             | -3°  | 146°       | -35° | 171°                                                      | -10° | 133°       | -40° |
| $\Delta G$ [kJ/mol]                                                                                       | 0.0                              | 1.2  | 6.6        | 8.2  | 0.0                                                       | 13.5 | 4.1        | 14.8 |
| (RI-MP2-COSMO/def2-QZVP//PBE0-D3-COSMO/def2-TZVP)                                                         |                                  |      |            |      |                                                           |      |            |      |
| $\mu$ [D]                                                                                                 | 5.59                             | 5.99 | 3.03       | 4.82 | 6.50                                                      | 7.31 | 4.03       | 6.60 |
| PBE0-D3-COSMO/def2-TZVP                                                                                   |                                  |      |            |      |                                                           |      |            |      |
| $\mu_{\text{endo}}$ (RI-MP2)"BOLTZMANN"                                                                   | 5.74                             |      |            |      | 6.50                                                      |      |            |      |
| $\mu_{\text{ALL}}$ (RI-MP2)"BOLTZMANN"                                                                    | <b>5.61</b>                      |      |            |      | <b>6.11</b>                                               |      |            |      |
| <b><i>cis</i></b>                                                                                         |                                  |      |            |      |                                                           |      |            |      |
| $\Psi$ (N <sub>F</sub> -C <sub>i</sub> <sup>α</sup> -C <sub>F</sub> -OCH <sub>3</sub> /NMe <sub>2</sub> ) | -176°                            | 4°   | 160°       | -31° | 174°                                                      | -8°  | 163°       | -39° |
| $\Delta G$ [kJ/mol]                                                                                       | 0.0                              | 0.4  | 9.7        | 11.5 | 0.0                                                       | 9.42 | 6.17       | 11.8 |
| (RI-MP2-COSMO/def2-QZVP//PBE0-D3-COSMO/def2-TZVP)                                                         |                                  |      |            |      |                                                           |      |            |      |
| $\mu$ [D]                                                                                                 | 7.18                             | 2.56 | 7.11       | 3.08 | 9.74                                                      | 0.88 | 9.66       | 2.77 |
| PBE0-D3-COSMO/def2-TZVP                                                                                   |                                  |      |            |      |                                                           |      |            |      |
| $\mu_{\text{endo}}$ (RI-MP2)"BOLTZMANN"                                                                   | 5.06                             |      |            |      | 9.54                                                      |      |            |      |
| $\mu_{\text{ALL}}$ (RI-MP2)"BOLTZMANN"                                                                    | <b>5.07</b>                      |      |            |      | <b>9.50</b>                                               |      |            |      |
| <b><math>\Delta \mu_{\text{cis-trans}}</math> [D]</b>                                                     |                                  |      |            |      |                                                           |      |            |      |
| <i>endo</i> (RI-MP2)"BOLTZMANN"                                                                           | <b>-0.68</b>                     |      |            |      | <b>3.04</b>                                               |      |            |      |
| ALL (RI-MP2)"BOLTZMANN"                                                                                   | <b>-0.54</b>                     |      |            |      | <b>3.39</b>                                               |      |            |      |

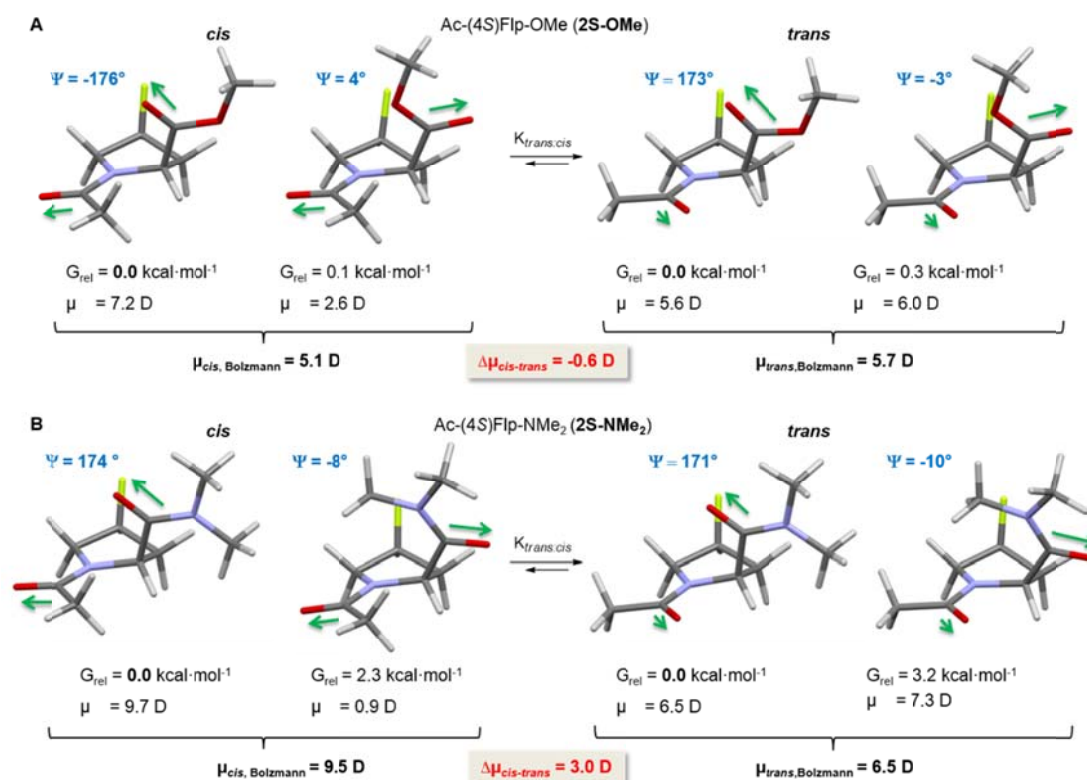

**Figure 7** Lowest energy structures and Boltzmann distribution averaged dipole moments  $\mu$  [D] of *trans* and *cis* conformers of Ac-(4S)Flp-OMe (**2S-OMe**) and Ac-(4S)Flp-NMe<sub>2</sub> (**2S-NMe<sub>2</sub>**) calculated with CHCl<sub>3</sub> as solvent at the PBE0-D3-COSMO/def2-TZVP level of theory.

### 3.6. Gibbs free energies and dipole moments of Ac-(4S)Azp-OMe (3S-OMe) and Ac-(4S)Azp-NMe<sub>2</sub> (3S-NMe<sub>2</sub>)

**Table 9** Relative free energies  $\Delta G$ , dipole moments  $\mu$  [D] and Boltzmann distribution averaged dipole moments of *endo* puckered *trans* and *cis* conformers of Ac-(4S)Azp-OMe (**3S-OMe**) considering the C <sup>$\delta$</sup> -C <sup>$\gamma$</sup> -N-N torsion. Calculated with CHCl<sub>3</sub> as solvent at the PBE0-D3-COSMO/def2-TZVP level of theory.

| Ac-(4S)Azp-OMe ( <b>3S-OMe</b> ) <i>endo</i>                                                              |         |       |              |         |
|-----------------------------------------------------------------------------------------------------------|---------|-------|--------------|---------|
| <b>trans</b>                                                                                              |         |       |              |         |
| $\Psi$ (N <sub>F</sub> -C <sub>i</sub> <sup><math>\alpha</math></sup> -C <sub>F</sub> -OCH <sub>3</sub> ) | -177.4° | 11.0° | 178.0°       | -0.1°   |
| $\Delta G$ [kJ/mol]<br>(RI-MP2-COSMO/def2-QZVP//PBE0<br>-D3-COSMO/def2-TZVP)                              | 0.0     | 0.7   | 0.9          | 1.3     |
| $\mu$ [D]<br>PBE0-D3-COSMO/def2-TZVP                                                                      | 5.64    | 5.70  | 5.80         | 5.68    |
| C <sup><math>\delta</math></sup> -C <sup><math>\gamma</math></sup> -N-N torsion                           | -172.6  | 176.5 | -51.9        | -52.3   |
| $\mu_{\text{ALL}}$ (RI-MP2) "BOLTZMANN"                                                                   |         |       | <b>5.70</b>  |         |
| <b>cis</b>                                                                                                |         |       |              |         |
| $\Psi$ (N <sub>F</sub> -C <sub>i</sub> <sup><math>\alpha</math></sup> -C <sub>F</sub> -OCH <sub>3</sub> ) | 15.1°   | 5.3°  | -164.8°      | -173.1° |
| $\Delta G$ [kJ/mol]<br>(RI-MP2-COSMO/def2-QZVP//PBE0<br>-D3-COSMO/def2-TZVP)                              | 0.0     | 0.2   | 0.2          | 0.9     |
| $\mu$ [D]<br>PBE0-D3-COSMO/def2-TZVP                                                                      | 2.47    | 3.06  | 6.74         | 7.56    |
| C <sup><math>\delta</math></sup> -C <sup><math>\gamma</math></sup> -N-N torsion                           | 176.7   | -56.4 | 174.7        | -56.0   |
| $\mu_{\text{ALL}}$ (RI-MP2) "BOLTZMANN"                                                                   |         |       | <b>4.73</b>  |         |
| $\Delta \mu_{\text{cis-trans}}$ [D]                                                                       |         |       | <b>-0.97</b> |         |

**Table 10** Relative free energies  $\Delta G$ , dipole moments  $\mu$  [D] and Boltzmann distribution averaged dipole moments of *endo* puckered *trans* and *cis* conformers of Ac-(4S)Azp-NMe<sub>2</sub> (**3S-NMe<sub>2</sub>**) considering the C <sup>$\delta$</sup> -C <sup>$\gamma$</sup> -N-N torsion. Calculated with CHCl<sub>3</sub> as solvent at the PBE0-D3-COSMO/def2-TZVP level of theory.

| Ac-(4S)Azp-NMe <sub>2</sub> ( <b>3S-NMe<sub>2</sub></b> ) <i>endo</i>                                     |        |        |             |       |
|-----------------------------------------------------------------------------------------------------------|--------|--------|-------------|-------|
| <b>trans</b>                                                                                              |        |        |             |       |
| $\Psi$ (N <sub>F</sub> -C <sub>i</sub> <sup><math>\alpha</math></sup> -C <sub>F</sub> -NMe <sub>2</sub> ) | 171.3° | 170.6° | -3.1°       | -4.7° |
| $\Delta G$ [kJ/mol]<br>(RI-MP2-COSMO/def2-QZVP//PBE0<br>-D3-COSMO/def2-TZVP)                              | 0.0    | 2.1    | 10.6        | 14.0  |
| $\mu$ [D]<br>PBE0-D3-COSMO/def2-TZVP                                                                      | 6.80   | 7.09   | 7.25        | 6.60  |
| C <sup><math>\delta</math></sup> -C <sup><math>\gamma</math></sup> -N-N torsion                           | 149.1  | -20.2  | 170.7       | -67.6 |
| $\mu_{\text{ALL}}$ (RI-MP2) "BOLTZMANN"                                                                   |        |        | <b>6.89</b> |       |
| <b>cis</b>                                                                                                |        |        |             |       |
| $\Psi$ (N <sub>F</sub> -C <sub>i</sub> <sup><math>\alpha</math></sup> -C <sub>F</sub> -NMe <sub>2</sub> ) | 178.5° | 174.3° | -1.9°       | -3.5° |
| $\Delta G$ [kJ/mol]<br>(RI-MP2-COSMO/def2-QZVP//PBE0<br>-D3-COSMO/def2-TZVP)                              | 0.0    | 1.4    | 8.6         | 8.8   |
| $\mu$ [D]<br>PBE0-D3-COSMO/def2-TZVP                                                                      | 9.36   | 10.22  | 0.28        | 0.69  |
| C <sup><math>\delta</math></sup> -C <sup><math>\gamma</math></sup> -N-N torsion                           | 161.4  | -25.1  | 174.5       | -66.5 |
| $\mu_{\text{ALL}}$ (RI-MP2) "BOLTZMANN"                                                                   |        |        | <b>9.34</b> |       |
| $\Delta \mu_{\text{cis-trans}}$ [D]                                                                       |        |        | <b>2.45</b> |       |

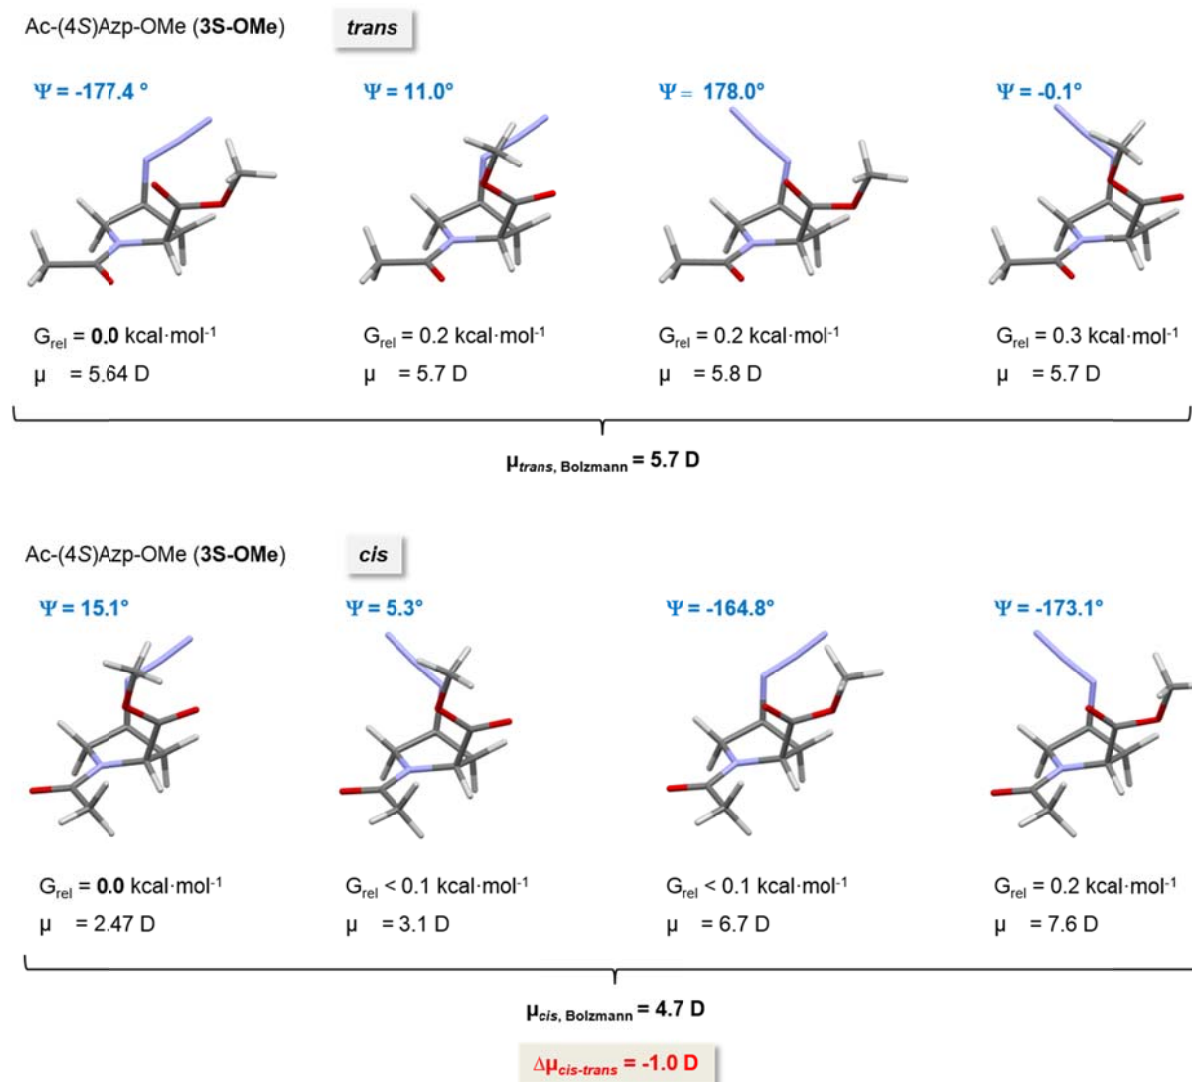

**Figure 8** Lowest energy structures and Boltzmann distribution averaged dipole moments  $\mu$  [D] of *trans* and *cis* conformers of Ac-(4S)Azp-OMe (3S-OMe) calculated with  $\text{CHCl}_3$  as solvent at the PBE0-D3-COSMO/def2-TZVP level of theory.

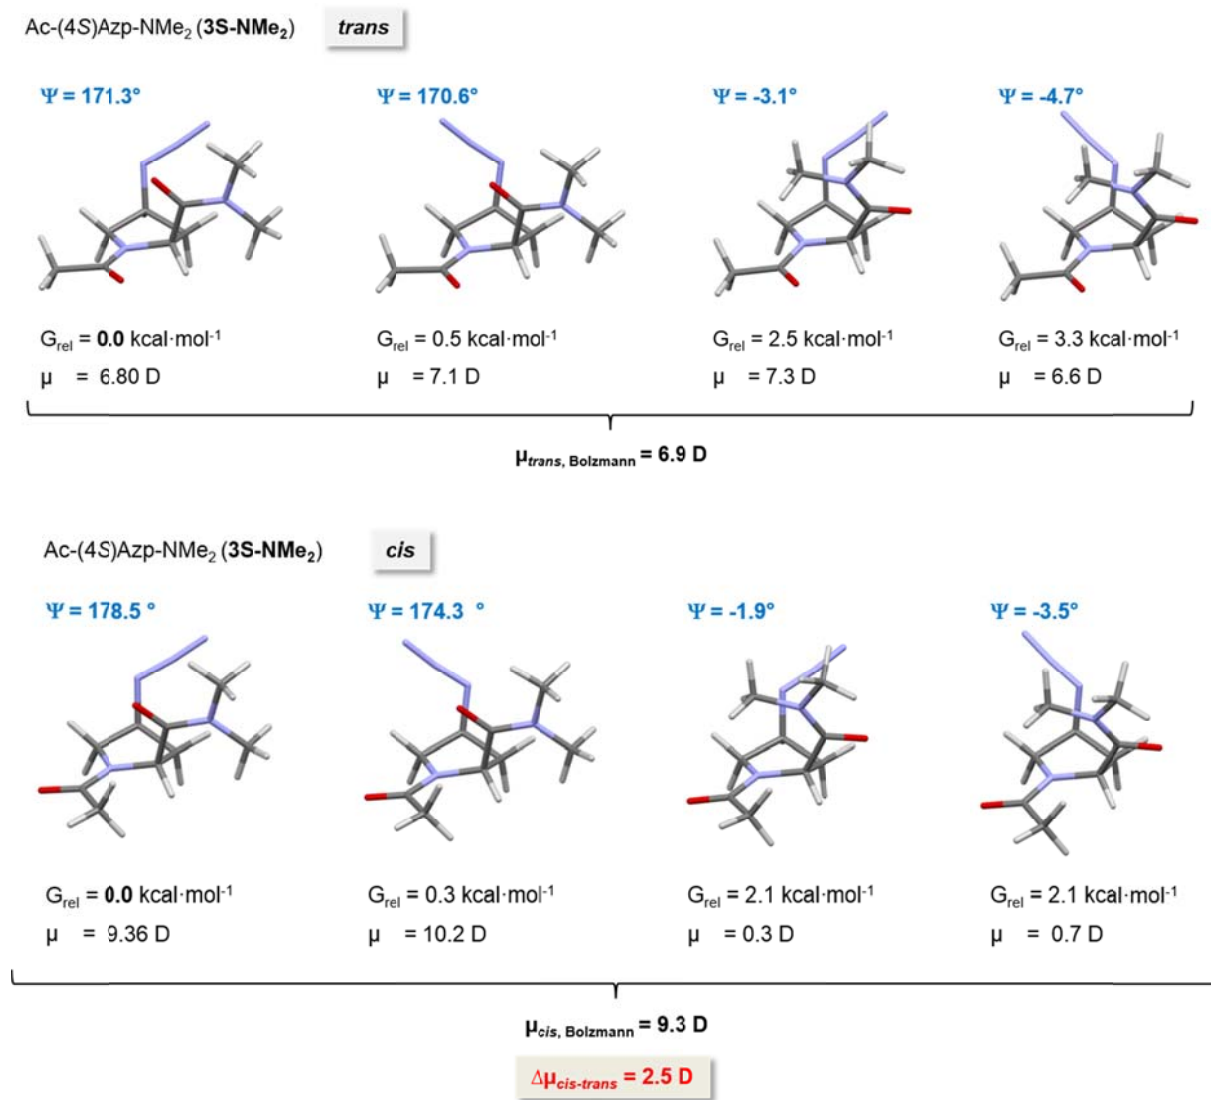

**Figure 9** Lowest energy structures and Boltzmann distribution averaged dipole moments  $\mu$  [D] of *trans* and *cis* conformers of Ac-(4S)Azp-NMe<sub>2</sub> (**3S-NMe<sub>2</sub>**) calculated with CHCl<sub>3</sub> as solvent at the PBE0-D3-COSMO/def2-TZVP level of theory.

**Table 11** Relative free energies  $\Delta G$  and dipole moments  $\mu$  [D] of *exo* puckered *trans* and *cis* conformers of Ac-(4S)Azp-OMe (**3S-OMe**) considering the C <sup>$\delta$</sup> -C <sup>$\gamma$</sup> -N-N torsion. Calculated with CHCl<sub>3</sub> as solvent at the PBE0-D3-COSMO/def2-TZVP level of theory.

| Ac-(4S)Azp-OMe ( <b>3S-OMe</b> ) <i>exo</i>                                                               |        |        |        |        |        |        |
|-----------------------------------------------------------------------------------------------------------|--------|--------|--------|--------|--------|--------|
| <b><i>trans</i></b>                                                                                       |        |        |        |        |        |        |
| $\Psi$ (N <sub>r</sub> -C <sub>i</sub> <sup><math>\alpha</math></sup> -C <sub>r</sub> -OCH <sub>3</sub> ) | 145.2° | 145.7° | -34.9° | -34.6° | 144.8° | -35.4° |
| $\Delta G$ [kJ/mol]<br>(RI-MP2-COSMO/def2-QZVP//PBE0-D3-COSMO/def2-TZVP)                                  | 4.2    | 5.0    | 5.9    | 5.9    | 6.0    | 7.8    |
| $\mu$ [D]<br>PBE0-D3-COSMO/def2-TZVP                                                                      | 2.53   | 2.55   | 4.65   | 4.40   | 3.04   | 4.43   |
| C <sup><math>\delta</math></sup> -C <sup><math>\gamma</math></sup> -N-N torsion                           | -162.9 | -90.9  | -162.6 | -92.7  | 62.7   | 62.8   |
| <b><i>cis</i></b>                                                                                         |        |        |        |        |        |        |
| $\Psi$ (N <sub>r</sub> -C <sub>i</sub> <sup><math>\alpha</math></sup> -C <sub>r</sub> -OCH <sub>3</sub> ) | 160.4  | 159.1  | -30.7  | -30.4  | 158.2  | -31.7  |
| $\Delta G$ [kJ/mol]<br>(RI-MP2-COSMO/def2-QZVP//PBE0-D3-COSMO/def2-TZVP)                                  | 7.5    | 7.5    | 8.7    | 9.3    | 10.2   | 11.2   |
| $\mu$ [D]<br>PBE0-D3-COSMO/def2-TZVP                                                                      | 7.35   | 6.94   | 3.03   | 3.41   | 7.33   | 3.10   |
| C <sup><math>\delta</math></sup> -C <sup><math>\gamma</math></sup> -N-N torsion                           | -87.6  | -161.5 | -161.4 | -89.3  | 60.8   | 61.0   |

**Table 12** Relative free energies  $\Delta G$  and dipole moments  $\mu$  [D] of *exo* puckered *trans* and *cis* conformers of Ac-(4S)Azp-NMe<sub>2</sub> (**3S-NMe<sub>2</sub>**) considering the C <sup>$\delta$</sup> -C <sup>$\gamma$</sup> -N-N torsion. Calculated with CHCl<sub>3</sub> as solvent at the PBE0-D3-COSMO/def2-TZVP level of theory.

| Ac-(4S)Azp-NMe <sub>2</sub> ( <b>3S-NMe<sub>2</sub></b> ) <i>exo</i>                                      |        |       |       |        |       |       |
|-----------------------------------------------------------------------------------------------------------|--------|-------|-------|--------|-------|-------|
| <b><i>trans</i></b>                                                                                       |        |       |       |        |       |       |
| $\Psi$ (N <sub>r</sub> -C <sub>i</sub> <sup><math>\alpha</math></sup> -C <sub>r</sub> -OCH <sub>3</sub> ) | 133.1  | 133.2 | 132.8 | -39.6  | -39.6 | -40.0 |
| $\Delta G$ [kJ/mol]<br>(RI-MP2-COSMO/def2-QZVP//PBE0-D3-COSMO/def2-TZVP)                                  | 1.3    | 2.5   | 4.3   | 12.2   | 12.8  | 14.9  |
| $\mu$ [D]<br>PBE0-D3-COSMO/def2-TZVP                                                                      | 3.72   | 3.83  | 4.41  | 6.54   | 6.29  | 6.11  |
| C <sup><math>\delta</math></sup> -C <sup><math>\gamma</math></sup> -N-N torsion                           | 164.5  | -89.9 | 63.5  | -163.0 | -92.7 | 63.4  |
| <b><i>cis</i></b>                                                                                         |        |       |       |        |       |       |
| $\Psi$ (N <sub>r</sub> -C <sub>i</sub> <sup><math>\alpha</math></sup> -C <sub>r</sub> -OCH <sub>3</sub> ) | 162.5  | 163.2 | 162.3 | -38.4  | -38.4 | -38.8 |
| $\Delta G$ [kJ/mol]<br>(RI-MP2-COSMO/def2-QZVP//PBE0-D3-COSMO/def2-TZVP)                                  | 3.6    | 5.0   | 7.3   | 9.5    | 9.8   | 12.1  |
| $\mu$ [D]<br>PBE0-D3-COSMO/def2-TZVP                                                                      | 9.42   | 9.87  | 9.88  | 2.81   | 3.05  | 2.33  |
| C <sup><math>\delta</math></sup> -C <sup><math>\gamma</math></sup> -N-N torsion                           | -162.3 | -86.5 | 61.2  | -162.0 | -90.6 | 61.9  |

**Table 13** Boltzmann averaged differences in dipole moments  $\Delta \mu_{cis-trans}$  [D] for the *endo* puckered conformations as well as over all *exo* and *endo* conformations.

| $\Delta \mu_{cis-trans}$ [D]    | Ac-(4 <i>S</i> )Azp-OMe ( <b>3S-OMe</b> ) | Ac-(4 <i>S</i> )Azp-NMe <sub>2</sub> ( <b>3S-NMe<sub>2</sub></b> ) |
|---------------------------------|-------------------------------------------|--------------------------------------------------------------------|
| <i>endo</i> (RI-MP2)"BOLTZMANN" | <b>-0.97</b>                              | <b>2.45</b>                                                        |
| ALL (RI-MP2) "BOLTZMANN"        | <b>-0.51</b>                              | <b>3.69</b>                                                        |



## 4. Cartesian Coordinates

### Ac-Pro-OMe (1-OMe) $\Psi = 155.6^\circ$ \_endo trans

|   |            |            |            |
|---|------------|------------|------------|
| H | 2.0607302  | 1.3300942  | 0.3688320  |
| C | 1.7805362  | 0.6089001  | -0.3993135 |
| C | 1.4347298  | -0.7668979 | 0.1845492  |
| N | 0.5196121  | -1.3180008 | -0.7882036 |
| C | 0.0606067  | -0.3353729 | -1.7631849 |
| C | 0.5168574  | 0.9881774  | -1.1636983 |
| H | 2.6258654  | 0.4970199  | -1.0821993 |
| C | 0.7723213  | -0.6251433 | 1.5430980  |
| H | 2.3128860  | -1.4028572 | 0.3019350  |
| H | 0.6804978  | 0.5262145  | 3.9185088  |
| H | -1.0217199 | -0.3829630 | -1.8908948 |
| H | 0.5291364  | -0.5143027 | -2.7376822 |
| H | 0.6909116  | 1.7499936  | -1.9237496 |
| C | 0.1287721  | -2.6043333 | -0.6923351 |
| O | 0.5455790  | -3.3244465 | 0.2096341  |
| C | -0.8361557 | -3.0943278 | -1.7350665 |
| H | -0.9400579 | -4.1724096 | -1.6364962 |
| H | -0.4993386 | -2.8453613 | -2.7435506 |
| H | -1.8136189 | -2.6270664 | -1.5879777 |
| O | -0.4076410 | -0.4708690 | 1.7251300  |
| O | 1.6822518  | -0.6329737 | 2.5131174  |
| C | 1.1813732  | -0.4393644 | 3.8383103  |
| H | 2.0499796  | -0.4733582 | 4.4911755  |
| H | 0.4790474  | -1.2326742 | 4.0961176  |
| H | -0.2418158 | 1.3598143  | -0.4714685 |

### Ac-Pro-OMe (1-OMe) $\Psi = -25.0^\circ$ \_endo trans

|   |            |            |            |
|---|------------|------------|------------|
| H | 2.0004508  | 1.3244397  | 0.3897856  |
| C | 1.7519859  | 0.6000671  | -0.3858419 |
| C | 1.3711563  | -0.7684567 | 0.1933536  |
| N | 0.4927761  | -1.3203629 | -0.8148996 |
| C | 0.0966040  | -0.3455997 | -1.8249055 |
| C | 0.5322745  | 0.9811654  | -1.2174546 |
| H | 2.6286063  | 0.4764620  | -1.0258362 |
| C | 0.7292469  | -0.6257383 | 1.5615391  |
| H | 2.2418008  | -1.4077254 | 0.3456607  |
| H | -1.0510599 | -1.2188249 | 3.4097600  |
| H | -0.9775007 | -0.3860367 | -2.0117792 |
| H | 0.6158456  | -0.5398422 | -2.7702355 |
| H | 0.7516452  | 1.7322130  | -1.9764338 |
| C | 0.0820898  | -2.6008475 | -0.7260478 |
| O | 0.4374900  | -3.3135065 | 0.2074763  |
| C | -0.8306248 | -3.0929937 | -1.8139729 |
| H | -0.9511565 | -4.1687598 | -1.7091384 |
| H | -0.4376097 | -2.8593794 | -2.8056292 |
| H | -1.8099045 | -2.6146445 | -1.7255330 |
| O | 1.3726403  | -0.5628626 | 2.5790769  |
| O | -0.5928405 | -0.5173113 | 1.5105207  |
| C | -1.2515998 | -0.3595027 | 2.7691018  |
| H | -2.3126736 | -0.2944145 | 2.5414287  |
| H | -0.9103109 | 0.5490581  | 3.2666769  |
| H | -0.2580931 | 1.3691193  | -0.5707667 |

### Ac-Pro-OMe (1-OMe) $\Psi = 166.4^\circ$ \_endo cis

|   |            |            |            |
|---|------------|------------|------------|
| H | 2.1343019  | 1.2820405  | 0.4162138  |
| C | 1.8159094  | 0.5724115  | -0.3471414 |
| C | 1.4537804  | -0.7986613 | 0.2421577  |
| N | 0.5523783  | -1.3458240 | -0.7435838 |
| C | 0.0453198  | -0.3383471 | -1.6701023 |
| C | 0.5388406  | 0.9735773  | -1.0761841 |
| H | 2.6381024  | 0.4394472  | -1.0539472 |
| C | 0.7938016  | -0.6319717 | 1.6021891  |
| H | 2.3429501  | -1.4178059 | 0.3746952  |
| H | 0.5734592  | 0.7028442  | 3.8736284  |
| H | -1.0412556 | -0.4016072 | -1.7393563 |
| H | 0.4535812  | -0.5164776 | -2.6701496 |
| H | 0.7082289  | 1.7357939  | -1.8365963 |
| C | 0.1753314  | -2.6371827 | -0.8462589 |
| O | -0.5856294 | -3.0026775 | -1.7350937 |
| C | 0.7357002  | -3.5956700 | 0.1700858  |
| H | 0.3405686  | -4.5873865 | -0.0367488 |
| H | 0.4522931  | -3.3018594 | 1.1834254  |

|   |            |            |            |
|---|------------|------------|------------|
| H | 1.8269515  | -3.6268331 | 0.1220545  |
| O | -0.3903227 | -0.6690382 | 1.8119531  |
| O | 1.7125748  | -0.4107771 | 2.5383119  |
| C | 1.2153804  | -0.1785956 | 3.8599075  |
| H | 2.0924588  | -0.0212310 | 4.4824063  |
| H | 0.6492316  | -1.0428591 | 4.2086398  |
| H | -0.1939617 | 1.3614068  | -0.3644024 |

### Ac-Pro-OMe (1-OMe) $\Psi = -16.4^\circ$ \_endo cis

|   |            |            |            |
|---|------------|------------|------------|
| H | 2.0453000  | 1.2685198  | 0.4764815  |
| C | 1.7697100  | 0.5645370  | -0.3083780 |
| C | 1.4041684  | -0.8174041 | 0.2510209  |
| N | 0.5593411  | -1.3684481 | -0.7840576 |
| C | 0.0699067  | -0.3570827 | -1.7160293 |
| C | 0.5208555  | 0.9558559  | -1.0899431 |
| H | 2.6233238  | 0.4497542  | -0.9802217 |
| C | 0.7442003  | -0.6702785 | 1.6134700  |
| H | 2.2971179  | -1.4226470 | 0.4157796  |
| H | -0.9475691 | -1.3497037 | 3.5208107  |
| H | -1.0125167 | -0.4359734 | -1.8261619 |
| H | 0.5163851  | -0.5173062 | -2.7024291 |
| H | 0.7140161  | 1.7260045  | -1.8365405 |
| C | 0.2147439  | -2.6652462 | -0.9205229 |
| O | -0.5054399 | -3.0332745 | -1.8419565 |
| C | 0.7588781  | -3.6268272 | 0.1017853  |
| H | 0.3742969  | -4.6196798 | -0.1189769 |
| H | 0.4583492  | -3.3436499 | 1.1133444  |
| H | 1.8510410  | -3.6505918 | 0.0743593  |
| O | 1.3785725  | -0.4783352 | 2.6207244  |
| O | -0.5789956 | -0.7424605 | 1.5679669  |
| C | -1.2569583 | -0.5761626 | 2.8173303  |
| H | -2.3161782 | -0.6671847 | 2.5915070  |
| H | -1.0368573 | 0.4047270  | 3.2395904  |
| H | -0.2473249 | 1.3305524  | -0.4090694 |

### Ac-Pro-OMe (1-OMe) $\Psi = 144.4^\circ$ \_exo trans

|   |            |            |            |
|---|------------|------------|------------|
| H | -0.2883141 | 2.5621203  | 0.2662366  |
| C | -0.2835634 | 1.6024847  | 0.7815781  |
| C | -1.6748619 | 1.0629580  | 1.0930392  |
| C | -1.4229269 | -0.4227291 | 1.2988949  |
| N | -0.3619104 | -0.7000423 | 0.3417434  |
| C | 0.3422001  | 0.4953347  | -0.0777038 |
| H | 0.2882673  | 1.7100472  | 1.7071995  |
| H | -2.1280446 | 1.5352050  | 1.9649540  |
| H | -1.0860513 | -0.6293112 | 2.3215029  |
| H | -2.3035555 | -1.0330051 | 1.0973835  |
| C | -0.0153027 | -1.8968330 | -0.1695957 |
| H | 4.3608126  | 1.5099566  | -1.4443634 |
| H | 0.1897290  | 0.6746618  | -1.1450717 |
| C | 1.8299937  | 0.3818553  | 0.1842880  |
| H | 4.2178813  | 1.4890640  | 0.3395939  |
| O | 0.8858244  | -1.9863752 | -0.9984394 |
| C | -0.7830725 | -3.0925796 | 0.3197577  |
| H | -0.7931612 | -3.1366190 | 1.4109678  |
| H | -0.3187794 | -3.9914416 | -0.0791664 |
| H | -1.8210285 | -3.0452062 | -0.0199551 |
| O | 2.3119072  | -0.1250385 | 1.1641328  |
| O | 2.5334812  | 0.9826859  | -0.7694562 |
| C | 3.9513827  | 0.9804098  | -0.5877292 |
| H | 4.3250442  | -0.0436444 | -0.5579511 |
| H | -2.3391622 | 1.2104944  | 0.2373707  |

### Ac-Pro-OMe (1-OMe) $\Psi = -35.6^\circ$ \_exo trans

|   |            |            |            |
|---|------------|------------|------------|
| H | -0.2224995 | 2.5302047  | 0.3031958  |
| C | -0.2624237 | 1.5676851  | 0.8110391  |
| C | -1.6768976 | 1.0634425  | 1.0707423  |
| C | -1.4726700 | -0.4298005 | 1.2754368  |
| N | -0.3814047 | -0.7314569 | 0.3596476  |
| C | 0.3590046  | 0.4504563  | -0.0390291 |
| H | 0.2808662  | 1.6554020  | 1.7559427  |
| H | -2.1486684 | 1.5425792  | 1.9288625  |
| H | -1.1833887 | -0.6519839 | 2.3094533  |
| H | -2.3609381 | -1.0145035 | 1.0352567  |
| C | -0.0474352 | -1.9377806 | -0.1381225 |
| H | 3.6095060  | -1.0196224 | 2.5019563  |
| H | 0.2306338  | 0.6410682  | -1.1077967 |
| C | 1.8510579  | 0.3565931  | 0.1916179  |

|   |            |            |            |
|---|------------|------------|------------|
| H | 4.0665442  | -0.9359286 | 0.7746329  |
| O | 0.8844141  | -2.0542909 | -0.9282298 |
| C | -0.8664771 | -3.1116693 | 0.3208229  |
| H | -0.9239819 | -3.1534004 | 1.4107066  |
| H | -0.4103208 | -4.0234293 | -0.0577283 |
| H | -1.8877397 | -3.0375005 | -0.0619589 |
| O | 2.6627002  | 0.9075796  | -0.5083255 |
| O | 2.1539519  | -0.3207630 | 1.2930481  |
| C | 3.5467413  | -0.4312659 | 1.5897744  |
| H | 3.9848716  | 0.5560783  | 1.7410956  |
| H | -2.3058240 | 1.2337348  | 0.1928732  |

**Ac-Pro-Ome (1-Ome)  $\Psi = 157.2^\circ_{\text{exo cis}}$**

|   |            |            |            |
|---|------------|------------|------------|
| H | -0.2096206 | 2.5438163  | 0.1537816  |
| C | -0.2095175 | 1.6056416  | 0.7069099  |
| C | -1.5974108 | 1.0807702  | 1.0491897  |
| C | -1.3478245 | -0.3972299 | 1.2933028  |
| N | -0.3116558 | -0.7136689 | 0.3193624  |
| C | 0.4110294  | 0.4621358  | -0.1195538 |
| H | 0.3684681  | 1.7485287  | 1.6241723  |
| H | -2.0342825 | 1.5822875  | 1.9129946  |
| H | -0.9858900 | -0.5822057 | 2.3108965  |
| H | -2.2177738 | -1.0304661 | 1.1244380  |
| C | -0.1422601 | -1.9705226 | -0.1460845 |
| H | 4.3452715  | 1.9956997  | -1.1769457 |
| H | 0.2654018  | 0.6440693  | -1.1882143 |
| C | 1.8976262  | 0.3934812  | 0.1611629  |
| H | 4.1751750  | 1.6640560  | 0.5735029  |
| O | -0.8090287 | -2.9031108 | 0.2883132  |
| C | 0.9002770  | -2.1782133 | -1.2110592 |
| H | 0.9089204  | -1.3813193 | -1.9570168 |
| H | 0.7050184  | -3.1306985 | -1.6988291 |
| H | 1.8892528  | -2.2202208 | -0.7480428 |
| O | 2.4110105  | -0.2637249 | 1.0283402  |
| O | 2.5622227  | 1.2056068  | -0.6555456 |
| C | 3.9731906  | 1.2961110  | -0.4329368 |
| H | 4.4393183  | 0.3186728  | -0.5604125 |
| H | -2.2723753 | 1.2086161  | 0.1986522  |

**Ac-Pro-Ome (1-Ome)  $\Psi = -31.2^\circ_{\text{exo cis}}$**

|   |            |            |            |
|---|------------|------------|------------|
| H | -0.0910348 | 2.5063865  | 0.2451409  |
| C | -0.1501524 | 1.5492148  | 0.7611281  |
| C | -1.5689295 | 1.0846242  | 1.0608845  |
| C | -1.3985380 | -0.4115313 | 1.2583485  |
| N | -0.3587154 | -0.7469109 | 0.2944498  |
| C | 0.4239862  | 0.4089210  | -0.1011179 |
| H | 0.4189464  | 1.6262709  | 1.6916495  |
| H | -1.9970131 | 1.5784532  | 1.9334202  |
| H | -1.0682492 | -0.6490240 | 2.2759151  |
| H | -2.2952257 | -0.9941079 | 1.0508576  |
| C | -0.2328617 | -1.9968061 | -0.2010748 |
| H | 3.6622858  | -1.1868676 | 2.3843352  |
| H | 0.2950354  | 0.6324432  | -1.1636933 |
| C | 1.9151770  | 0.3043742  | 0.1368141  |
| H | 4.1631585  | -0.9594789 | 0.6816401  |
| O | -0.9429969 | -2.9130615 | 0.1979976  |
| C | 0.8208280  | -2.2163391 | -1.2529209 |
| H | 0.8616859  | -1.4088904 | -1.9859823 |
| H | 0.6101935  | -3.1568760 | -1.7570640 |
| H | 1.8035355  | -2.2924214 | -0.7799327 |
| O | 2.7280095  | 0.8877692  | -0.5354956 |
| O | 2.2156497  | -0.4428741 | 1.1911491  |
| C | 3.6056825  | -0.5343003 | 1.5170021  |
| H | 4.0054352  | 0.4525621  | 1.7522395  |
| H | -2.2199910 | 1.2750777  | 0.2034696  |

**Ac-Pro-NMe<sub>2</sub> (1-NMe<sub>2</sub>)  $\Psi = 159.1^\circ_{\text{endo trans}}$**

|   |            |            |            |
|---|------------|------------|------------|
| H | 2.0634280  | 1.2935899  | 0.3359647  |
| C | 1.7456295  | 0.6027225  | -0.4458192 |
| C | 1.4849951  | -0.8118977 | 0.0840889  |
| N | 0.5433017  | -1.3448388 | -0.8739663 |
| C | -0.0735443 | -0.3176366 | -1.7035719 |
| C | 0.4071037  | 0.9831989  | -1.0714012 |
| H | 2.5304626  | 0.5619877  | -1.2054548 |
| C | 0.8581747  | -0.7715366 | 1.4825844  |
| H | 2.3785585  | -1.4347919 | 0.0902368  |
| H | -1.1616630 | -0.4026196 | -1.6946455 |

|   |            |            |            |
|---|------------|------------|------------|
| H | 0.2683890  | -0.4080939 | -2.7408152 |
| H | 0.4909196  | 1.7910702  | -1.7986225 |
| C | 0.2556474  | -2.6594069 | -0.8797295 |
| O | 0.8041236  | -3.4347941 | -0.1010194 |
| C | -0.7653355 | -3.1179167 | -1.8836114 |
| H | -0.7892590 | -4.2052464 | -1.8879708 |
| H | -0.5385057 | -2.7491128 | -2.8862615 |
| H | -1.7537443 | -2.7398199 | -1.6086636 |
| O | -0.3589363 | -0.7400310 | 1.6092019  |
| H | -0.2914178 | 1.2916215  | -0.2913816 |
| N | 1.7073612  | -0.7214101 | -2.5306332 |
| C | 1.1851954  | -0.7450468 | 3.8789270  |
| H | 1.5178317  | -1.6495437 | 4.3977807  |
| H | 1.5393405  | 0.1256553  | 4.4378152  |
| H | 0.0992910  | -0.7334328 | 3.8418424  |
| C | 3.1478287  | -0.8006435 | 2.4163272  |
| H | 3.5004397  | -1.8374327 | 2.4399046  |
| H | 3.5090836  | -0.3243817 | 1.5076041  |
| H | 3.5919082  | -0.2696829 | 3.2598850  |

**Ac-Pro-NMe<sub>2</sub> (1-NMe<sub>2</sub>)  $\Psi = -18.2^\circ_{\text{endo trans}}$**

|   |            |            |            |
|---|------------|------------|------------|
| H | 1.9961279  | 1.3007595  | 0.2478805  |
| C | 1.7803184  | 0.5542612  | -0.5154003 |
| C | 1.2764693  | -0.7605404 | 0.0922048  |
| N | 0.4333005  | -1.3085818 | -0.9530635 |
| C | 0.1977552  | -0.3721031 | -2.0469161 |
| C | 0.6703340  | 0.9591504  | -1.4778776 |
| H | 2.7032002  | 0.3595767  | -1.0664673 |
| C | 0.7118312  | -0.5651725 | 1.5046653  |
| H | 2.1044252  | -1.4473440 | 0.2770614  |
| H | -0.8557125 | -0.3564191 | -2.3369434 |
| H | 0.7839523  | -0.6554257 | -2.9279278 |
| H | 1.0072975  | 1.6416100  | -2.2581761 |
| C | 0.0663701  | -2.6065175 | -0.9305472 |
| O | 0.3490251  | -3.3298262 | 0.0186221  |
| C | -0.7201396 | -3.1007729 | -2.1128511 |
| H | -0.8891989 | -4.1688706 | -1.9987252 |
| H | -0.1909404 | -2.9103027 | -3.0493793 |
| H | -1.6843647 | -2.5884725 | -2.1721630 |
| O | 1.5614745  | -0.4322233 | 2.3820624  |
| H | -0.1414835 | 1.4513149  | -0.9355271 |
| N | -0.6067328 | -0.5331759 | 1.7832062  |
| C | -1.0190230 | -0.5048419 | 3.1727161  |
| H | -1.4863014 | 0.4542043  | 3.4162941  |
| H | -1.7464758 | -1.3012629 | 3.3512843  |
| H | -0.1539765 | -0.6524392 | 3.8123830  |
| C | -1.7062892 | -0.5794843 | 0.8425574  |
| H | -2.5460936 | -0.0383056 | 1.2815115  |
| H | -1.4650159 | -0.0935149 | -0.0959745 |
| H | -2.0282774 | -1.6070698 | 0.6468751  |

**Ac-Pro-NMe<sub>2</sub> (1-NMe<sub>2</sub>)  $\Psi = 167.0^\circ_{\text{endo cis}}$**

|   |            |            |            |
|---|------------|------------|------------|
| H | 2.1841386  | 1.2195129  | 0.3951378  |
| C | 1.8287713  | 0.5555350  | -0.3931215 |
| C | 1.5288863  | -0.8622795 | 0.1134540  |
| N | 0.5783185  | -1.3487719 | -0.8604614 |
| C | -0.0310432 | -0.2815026 | -1.6446469 |
| C | 0.4940990  | 0.9884140  | -0.9898192 |
| H | 2.5989248  | 0.5010690  | -1.1666713 |
| C | 0.9177839  | -0.8237226 | 1.5229216  |
| H | 2.4214372  | -1.4889073 | 0.1095884  |
| H | -1.1184159 | -0.3645523 | -1.6156019 |
| H | 0.2811554  | -0.3654390 | -2.6906689 |
| H | 0.5951216  | 1.8110411  | -1.6977832 |
| C | 0.1984158  | -2.6306755 | -1.0233730 |
| O | -0.6325502 | -2.9412398 | -1.8712691 |
| C | 0.8470810  | -3.6552975 | -0.1313334 |
| H | 0.4430820  | -4.6339717 | -0.3794632 |
| H | 0.6451964  | -3.4378876 | 0.9198122  |
| H | 1.9309185  | -3.6693342 | -0.2712540 |
| O | -0.2917883 | -0.9342235 | 1.6683303  |
| H | -0.1838547 | 1.3045019  | -0.1938709 |
| N | 1.7640761  | -0.6489347 | -2.0614566 |
| C | 1.2346141  | -0.5426783 | 3.9033865  |
| H | 1.7490719  | -1.2486789 | 4.5609432  |
| H | 1.3861654  | 0.4682260  | 4.2953061  |
| H | 0.1715835  | -0.7662641 | 3.8904822  |

|   |           |            |           |
|---|-----------|------------|-----------|
| C | 3.1903443 | -0.4426627 | 2.4609909 |
| H | 3.5572296 | -0.5982882 | 1.4515635 |
| H | 3.4518155 | 0.5761077  | 2.7664535 |
| H | 3.7104325 | -1.1397744 | 3.1240095 |

**Ac-Pro-NMe<sub>2</sub> (1-NMe<sub>2</sub>)  $\Psi = -15.5^\circ$ \_endo cis**

|   |            |            |            |
|---|------------|------------|------------|
| H | 2.0348327  | 1.3028123  | 0.3762935  |
| C | 1.8303177  | 0.6011794  | -0.4314281 |
| C | 1.3837606  | -0.7683270 | 0.0976671  |
| N | 0.5730299  | -1.2895675 | -0.9851594 |
| C | 0.2531608  | -0.2850619 | -1.9946823 |
| C | 0.6904119  | 1.0230726  | -1.3503834 |
| H | 2.7492367  | 0.4713723  | -1.0075474 |
| C | 0.8000088  | -0.6703597 | 1.5151788  |
| H | 2.2567560  | -1.4047418 | 0.2559599  |
| H | -0.8094461 | -0.1382795 | -2.2449931 |
| H | 0.8090513  | -0.4957341 | -2.9135840 |
| H | 0.9944367  | 1.7634597  | -2.0901594 |
| C | 0.2309789  | -2.5819988 | -1.1679976 |
| O | -0.4055299 | -2.9316933 | -2.1563959 |
| C | 0.6629589  | -3.5585490 | -0.1080409 |
| H | 0.2491714  | -4.5351378 | -0.3476080 |
| H | 0.3231837  | -3.2525935 | 0.8839675  |
| H | 1.7531974  | -3.6296090 | -0.0729645 |
| O | 1.6335805  | -0.5411906 | 2.4079770  |
| H | -0.1263334 | 1.4572612  | -0.7670511 |
| N | -0.5183517 | -0.7566337 | 1.7816682  |
| C | -0.9352139 | -0.8256745 | 3.1691430  |
| H | -1.3405697 | 0.1347461  | 3.5022133  |
| H | -1.7136937 | -1.5854453 | 3.2693668  |
| H | -0.0863222 | -1.0864642 | 3.7948796  |
| C | -1.6144698 | -0.7387342 | 0.8327939  |
| H | -1.3631389 | -0.2058900 | -0.0758794 |
| H | -1.9456720 | -1.7491607 | 0.5740983  |
| H | -2.4522692 | -0.2154964 | 1.2969293  |

**Ac-Pro-NMe<sub>2</sub> (1-NMe<sub>2</sub>)  $\Psi = 132.9^\circ$ \_exo trans**

|   |            |            |            |
|---|------------|------------|------------|
| H | -0.5236813 | 2.6483360  | 0.4106993  |
| C | -0.4108485 | 1.6752510  | 0.8888387  |
| C | -1.7358857 | 1.0295470  | 1.2791497  |
| C | -1.3690346 | -0.4413934 | 1.3986012  |
| N | -0.3876283 | -0.6073916 | 0.3386360  |
| C | 0.2354447  | 0.6492868  | -0.0497568 |
| H | 0.2192123  | 1.7926247  | 1.7733460  |
| H | -2.1500406 | 1.4337764  | 2.2033930  |
| H | -0.9223096 | -0.6585665 | 2.3759306  |
| H | -2.2217731 | -1.1048476 | 1.2531350  |
| C | -0.0358619 | -1.7481507 | -0.2772850 |
| H | -0.0109686 | 0.8565463  | -1.0907694 |
| C | 1.7455435  | 0.5844789  | 0.1779430  |
| O | 0.7894727  | -1.7430119 | -1.1892108 |
| C | -0.6996707 | -3.0117927 | 0.1957042  |
| H | -0.6080849 | -3.1257304 | 1.2779899  |
| H | -0.2321726 | -3.8579337 | -0.3026251 |
| H | -1.7653707 | -2.9985137 | -0.0475387 |
| O | 2.1605584  | 0.2072045  | 1.2683085  |
| H | -2.4753643 | 1.1618259  | 0.4844717  |
| N | 2.5534443  | 1.0108517  | -0.8105924 |
| C | 3.9861339  | 0.9780032  | -0.6097085 |
| H | 4.4337116  | 1.8957777  | -0.9968480 |
| H | 4.1968844  | 0.8916190  | 0.4530227  |
| H | 4.4333970  | 0.1235390  | -1.1284940 |
| C | 2.0896901  | 1.2643602  | -2.1630633 |
| H | 1.5962535  | 0.3830827  | -2.5792666 |
| H | 1.4118924  | 2.1195157  | -2.2099499 |
| H | 2.9558694  | 1.4969431  | -2.7803868 |

**Ac-Pro-NMe<sub>2</sub> (1-NMe<sub>2</sub>)  $\Psi = -40.5^\circ$ \_exo trans**

|   |            |            |           |
|---|------------|------------|-----------|
| H | -0.4714844 | 2.6831732  | 0.3940103 |
| C | -0.5053590 | 1.7212921  | 0.9037814 |
| C | -1.9098723 | 1.1458047  | 1.0373987 |
| C | -1.6560147 | -0.3388220 | 1.2591521 |
| N | -0.4456587 | -0.5874935 | 0.4860657 |
| C | 0.2379918  | 0.6426162  | 0.1104029 |
| H | -0.0509531 | 1.8505527  | 1.8900808 |
| H | -2.4829601 | 1.5949309  | 1.8488070 |
| H | -1.4930577 | -0.5588009 | 2.3220679 |

|   |            |            |            |
|---|------------|------------|------------|
| H | -2.4800303 | -0.9624380 | 0.9120712  |
| C | -0.0350376 | -1.7794281 | 0.0083371  |
| H | 0.1079698  | 0.8092146  | -0.9624838 |
| C | 1.7530353  | 0.7125686  | 0.2875341  |
| O | 0.9533344  | -1.8663447 | -0.7122738 |
| C | -0.8410913 | -2.9839116 | 0.4122858  |
| H | -1.0264023 | -3.0037341 | 1.4883549  |
| H | -0.2991273 | -3.8789209 | 0.1154735  |
| H | -1.8121618 | -2.9746922 | -0.0900453 |
| O | 2.3812330  | 1.3224934  | -0.5715313 |
| H | -2.4638359 | 1.2902357  | 0.1061804  |
| N | 2.3495807  | 0.1854742  | 1.3769447  |
| C | 3.7946540  | 0.1761860  | 1.4521158  |
| H | 4.1509437  | -0.8501200 | 1.5812486  |
| H | 4.2062633  | 0.5889401  | 0.5355723  |
| H | 4.1380323  | 0.7728763  | 2.3025498  |
| C | 1.6856360  | -0.4883346 | 2.4683375  |
| H | 0.6778113  | -0.1168386 | 2.6243757  |
| H | 1.6461108  | -1.5718404 | 2.3123033  |
| H | 2.2502022  | -0.2971932 | 3.3832515  |

**Ac-Pro-NMe<sub>2</sub> (1-NMe<sub>2</sub>)  $\Psi = 160.9^\circ$ \_exo cis**

|   |            |            |            |
|---|------------|------------|------------|
| H | -0.3624635 | 2.5133708  | -0.1452800 |
| C | -0.2649536 | 1.6448029  | 0.5058974  |
| C | -1.5899637 | 1.1526247  | 1.0737499  |
| C | -1.2857272 | -0.2913123 | 1.4309064  |
| N | -0.3916902 | -0.7011220 | 0.3601187  |
| C | 0.2981910  | 0.4220302  | -0.2446432 |
| H | 0.4125112  | 1.9108270  | 1.3220478  |
| H | -1.9232011 | 1.7386289  | 1.9307924  |
| H | -0.7818707 | -0.3680134 | 2.4014434  |
| H | -2.1598822 | -0.9406115 | -0.4510013 |
| C | -0.2666302 | -1.9952220 | 0.0016129  |
| H | 0.0477340  | 0.4705692  | -1.3069074 |
| C | 1.8138979  | 0.3430362  | -0.0444926 |
| O | -0.8704155 | -2.8826529 | 0.5969148  |
| C | 0.6399086  | -2.3060971 | -1.1583983 |
| H | 0.5335837  | -1.5936659 | -1.9787795 |
| H | 0.4093057  | -3.3078992 | -1.5141964 |
| H | 1.6785471  | -2.2799093 | -0.8211286 |
| O | 2.2720597  | -0.3487530 | 0.8543912  |
| H | -2.3696720 | 1.1885241  | 0.3080699  |
| N | 2.5931911  | 1.0794730  | -0.8654640 |
| C | 4.0265270  | 1.0821078  | -0.6678929 |
| H | 4.3588119  | 2.0474691  | -0.2724167 |
| H | 4.2963477  | 0.2973876  | 0.0331695  |
| H | 4.5279982  | 0.9090255  | -1.6236032 |
| C | 2.1259567  | 2.0127936  | -1.8647219 |
| H | 2.6201931  | 1.8098347  | -2.8188069 |
| H | 1.0535983  | 1.9463574  | -2.0173032 |
| H | 2.3661225  | 3.0391615  | -1.5681481 |

**Ac-Pro-NMe<sub>2</sub> (1-NMe<sub>2</sub>)  $\Psi = -38.7^\circ$ \_exo cis**

|   |            |            |            |
|---|------------|------------|------------|
| H | -0.1037185 | 2.4639398  | 0.2755852  |
| C | -0.2217077 | 1.5036883  | 0.7759818  |
| C | -1.6710789 | 1.1152901  | 1.0388161  |
| C | -1.5994516 | -0.3941369 | 1.2077252  |
| N | -0.5228606 | -0.7802277 | 0.3036321  |
| C | 0.2957238  | 0.3554167  | -0.1009930 |
| H | 0.3371428  | 1.5474285  | 1.7147046  |
| H | -2.0927517 | 1.6140967  | 1.9116309  |
| H | -1.3591305 | -0.6755487 | 2.2401250  |
| H | -2.5155423 | -0.9161697 | 0.9331206  |
| C | -0.4564234 | -2.0311913 | -0.2016388 |
| H | 0.1072077  | 0.5930471  | -1.1519579 |
| C | 1.8167865  | 0.2218996  | -0.0356491 |
| O | -1.2195491 | -2.9107038 | 0.1845802  |
| C | 0.5981228  | -2.3019417 | -1.2397811 |
| H | 0.6899096  | -1.4934070 | -1.9669363 |
| H | 0.3449036  | -3.2292036 | -1.7488676 |
| H | 1.5721598  | -2.4251514 | -0.7588984 |
| O | 2.4589033  | 0.7542402  | -0.9359285 |
| H | -2.2893059 | 1.3626155  | 0.1718053  |
| N | 2.4097518  | -0.4352886 | 0.9808034  |
| C | 3.8451516  | -0.6248705 | 0.9529545  |
| H | 4.0764921  | -1.6718568 | 1.1653254  |
| H | 4.2281097  | -0.3580914 | -0.0282150 |

|   |           |            |           |
|---|-----------|------------|-----------|
| H | 4.3326075 | -0.0013181 | 1.7085562 |
| C | 1.7459493 | -0.9967163 | 2.1376867 |
| H | 2.3997077 | -0.8698785 | 3.0028265 |
| H | 0.8117815 | -0.4913266 | 2.3567281 |
| H | 1.5468687 | -2.0658390 | 2.0121501 |

**Ac-(4S)Flp-OMe (2S-OMe) and Ac-(4S)Flp-NMe<sub>2</sub> (2S-NMe<sub>2</sub>)**

**Ac-(4S)Flp-NMe<sub>2</sub>(2S-NMe<sub>2</sub>) $\Psi$  = 174.2° endo cis**

|   |            |            |            |
|---|------------|------------|------------|
| H | 2.1917306  | 1.1913437  | 0.4039410  |
| C | 1.8616290  | 0.5029291  | -0.3723341 |
| C | 1.5213199  | -0.9045446 | 0.1370818  |
| N | 0.5637724  | -1.3628624 | -0.8421393 |
| C | -0.0524867 | -0.2776669 | -1.5886803 |
| C | 0.5761613  | 0.9760644  | -1.0176445 |
| H | 2.6423576  | 0.4363262  | -1.1329044 |
| C | 0.9196956  | -0.9059835 | 1.5556415  |
| H | 2.4031029  | -1.5476545 | 0.1261769  |
| H | -1.1362839 | -0.2658636 | -1.4583427 |
| H | 0.1590348  | -0.3798937 | -2.6563613 |
| H | 0.7250069  | 1.7579025  | -1.7631852 |
| C | 0.1721833  | -2.6381974 | -1.0443446 |
| O | -0.6784803 | -2.9047200 | -1.8858617 |
| C | 0.8371912  | -3.6993126 | -0.2117586 |
| H | 0.4339868  | -4.6670690 | -0.5004183 |
| H | 0.6465281  | -3.5292157 | 0.8497742  |
| H | 1.9190378  | -3.7008692 | -0.3670628 |
| O | -0.2602972 | -1.1736647 | 1.7198114  |
| N | 1.7542475  | -0.6125048 | 2.5763233  |
| C | 1.2332539  | -0.5275896 | 3.9231379  |
| H | 1.7135044  | -1.2741217 | 4.5627073  |
| H | 1.4326577  | 0.4644906  | 4.3389130  |
| H | 0.1613534  | -0.7034569 | 3.9061657  |
| C | 3.1655526  | -0.3288123 | 2.4572615  |
| H | 3.5503596  | -0.5680087 | 1.4704926  |
| H | 3.3701738  | 0.7273055  | 2.6628240  |
| H | 3.7174891  | -0.9289324 | 3.1859078  |
| F | -0.2540488 | 1.5132266  | -0.0318770 |

**Ac-(4S)Flp-OMe(2S-OMe) $\Psi$  = 173.3° endo trans**

|   |            |            |            |
|---|------------|------------|------------|
| H | 2.1145785  | 1.2357955  | 0.3996237  |
| C | 1.8155293  | 0.5126725  | -0.3574274 |
| C | 1.4046749  | -0.8459499 | 0.2171769  |
| N | 0.4820353  | -1.3528380 | -0.7689670 |
| C | -0.0034047 | -0.3220331 | -1.6745214 |
| C | 0.5894507  | 0.9605710  | -1.1237879 |
| H | 2.6444726  | 0.3758153  | -1.0544149 |
| C | 0.7520675  | -0.7342310 | 1.5882349  |
| H | 2.2590911  | -1.5162386 | 0.3275808  |
| H | 0.4266550  | 0.5354602  | 3.8799477  |
| H | -1.0932445 | -0.2594296 | -1.6871096 |
| H | 0.3481143  | -0.4941457 | -2.6965085 |
| H | 0.7951326  | 1.7010939  | -1.8973978 |
| C | 0.1470975  | -2.6617026 | -0.7941604 |
| O | 0.6314339  | -3.4541666 | 0.0039562  |
| C | -0.8398225 | -3.0742191 | -1.8985353 |
| H | -0.9634226 | -4.1537882 | -1.8103568 |
| H | -0.5023741 | -2.7796157 | -2.8458465 |
| H | -1.8054959 | -2.5936234 | -1.6725838 |
| O | -0.4110484 | -0.9125941 | 1.8268915  |
| O | 1.6643515  | -0.4042842 | 2.4998909  |
| C | 1.1805488  | -0.2514888 | 3.8370688  |
| H | 2.0466043  | 0.0177240  | 4.4365089  |
| H | 0.7466935  | -1.1870869 | 4.1912596  |
| F | -0.3150341 | 1.5416096  | -0.2335206 |

**Ac-(4S)Flp-OMe(2S-OMe) $\Psi$  = 4.4° endo cis**

|   |           |            |            |
|---|-----------|------------|------------|
| H | 2.1627774 | 1.1843665  | 0.4755083  |
| C | 1.8508015 | 0.4758941  | -0.2897166 |
| C | 1.3833238 | -0.8647769 | 0.2841974  |
| N | 0.5204415 | -1.3711006 | -0.7585534 |
| C | 0.0541374 | -0.3201814 | -1.6531725 |
| C | 0.6421995 | 0.9464003  | -1.0682519 |
| H | 2.6806985 | 0.3066338  | -0.9782120 |
| C | 0.7223212 | -0.6677731 | 1.6444472  |
| H | 2.2323040 | -1.5278020 | 0.4628509  |

|   |            |            |            |
|---|------------|------------|------------|
| H | -0.6860436 | -1.4694187 | 3.7238010  |
| H | -1.0356587 | -0.2720467 | -1.6854470 |
| H | 0.4163762  | -0.4950941 | -2.6697035 |
| H | 0.8593806  | 1.7087701  | -1.8163631 |
| C | 0.1697259  | -2.6584704 | -0.9669079 |
| O | -0.5613704 | -2.9621681 | -1.9017536 |
| C | 0.7278257  | -3.6821396 | -0.0169698 |
| H | 0.3185485  | -4.6547991 | -0.2792092 |
| H | 0.4678275  | -3.4461674 | 1.0166107  |
| H | 1.8177874  | -3.7224845 | -0.0886645 |
| O | 1.3191729  | -0.1963996 | -2.5795432 |
| O | -0.5334637 | -1.0805599 | 1.6875035  |
| C | -1.2027021 | -0.9130182 | 2.9412372  |
| H | -2.2062804 | -1.3027843 | 2.7928366  |
| H | -1.2371944 | -0.1430821 | 3.2099617  |
| F | -0.2740527 | 1.5035481  | -0.1685844 |

**Ac-(4S)Flp-NMe<sub>2</sub> (2S-NMe<sub>2</sub>) $\Psi$  = 133.4°exo trans**

|   |            |            |            |
|---|------------|------------|------------|
| H | -0.5765379 | 2.6399416  | 0.3112580  |
| C | -0.4398754 | 1.6811262  | 0.8090732  |
| C | -1.7419730 | 1.0197566  | 1.2164380  |
| C | -1.3652287 | -0.4443699 | 1.3739979  |
| N | -0.3981612 | -0.6148928 | 0.3127949  |
| C | 0.2270597  | 0.6391811  | -0.0917773 |
| H | 0.1590615  | 1.8248410  | 1.7115340  |
| H | -2.5209506 | 1.1463454  | 0.4596577  |
| H | -0.9200406 | -0.5973488 | 2.3644718  |
| H | -2.2166267 | -1.1139081 | 1.2581673  |
| C | -0.0415134 | -1.7626217 | -0.2944078 |
| H | 0.0025644  | 0.8178282  | -1.1421004 |
| C | 1.7337007  | 0.5871007  | 0.1718924  |
| O | 0.7866361  | -1.7545023 | -1.2007915 |
| C | -0.7019501 | -3.0235815 | 0.1864378  |
| H | -0.5935130 | -3.1380231 | 1.2672038  |
| H | -0.2438565 | -3.8705753 | -0.3188166 |
| H | -1.7711237 | -3.0071820 | -0.0404709 |
| O | 2.1208097  | 0.2232876  | 1.2762550  |
| N | 2.5594374  | 1.0041480  | -0.8037698 |
| C | 3.9881908  | 0.9821564  | -0.5729967 |
| H | 4.4355673  | 1.9069809  | -0.9431338 |
| H | 4.1773813  | 0.8886450  | 0.4931185  |
| H | 4.4522132  | 0.1359710  | -1.0900990 |
| C | 2.1212043  | 1.2543199  | -2.1655495 |
| H | 1.6447971  | 0.3690424  | -2.5929569 |
| H | 1.4372399  | 2.1036184  | -2.2256667 |
| H | 2.9977429  | 1.4953461  | -2.7644914 |
| F | -2.2357214 | 1.5398243  | 2.4004985  |

**Ac-(4S)Flp-NMe<sub>2</sub> (2S-NMe<sub>2</sub>) $\Psi$  = -38.5° exo cis**

|   |            |            |            |
|---|------------|------------|------------|
| H | -0.5233619 | 2.7455763  | 0.3819020  |
| C | -0.5236933 | 1.7761398  | 0.8764344  |
| C | -1.9026681 | 1.1646765  | 1.0279380  |
| C | -1.6330549 | -0.3211974 | 1.1989382  |
| N | -0.4379583 | -0.5270579 | 0.4035319  |
| C | 0.2384239  | 0.7226033  | 0.0682109  |
| H | -0.0917070 | 1.8985147  | 1.8731912  |
| H | -2.5291135 | 1.3572632  | 0.1533476  |
| H | -1.4678678 | -0.5441700 | 2.2602632  |
| H | -2.4398965 | -0.9602941 | 0.8434946  |
| C | -0.1478528 | -1.7491221 | -0.1033146 |
| H | 0.1232316  | 0.9302421  | -0.9988869 |
| C | 1.7503894  | 0.8184268  | 0.2840371  |
| O | -0.8130844 | -2.7300967 | 0.2044164  |
| C | 1.0287428  | -1.8450657 | -1.0340847 |
| H | 1.0604817  | -1.0277860 | -1.7565219 |
| H | 0.9725953  | -2.7971706 | -1.5566926 |
| H | 1.9602173  | -1.8165948 | -0.4624977 |
| O | 2.3878185  | 1.4443944  | -0.5562502 |
| N | 2.3298175  | 0.2499220  | 1.3585472  |
| C | 3.7736786  | 0.2769501  | 1.4736910  |
| H | 4.1349993  | -0.7234724 | 1.7245459  |
| H | 4.2079151  | 0.5962615  | 0.5303111  |
| H | 4.0852540  | 0.9677569  | 2.2627980  |
| C | 1.6447634  | -0.4068275 | 2.4517669  |
| H | 0.6361713  | -0.0312598 | 2.5867341  |
| H | 1.6018431  | -1.4914009 | 2.3115920  |

|                                                                                            |            |            |            |                                                                                           |            |            |            |  |  |  |  |
|--------------------------------------------------------------------------------------------|------------|------------|------------|-------------------------------------------------------------------------------------------|------------|------------|------------|--|--|--|--|
| H                                                                                          | 2.1950102  | -0.2020078 | 3.3718262  | C                                                                                         | 0.8713313  | -3.7073392 | -0.3057191 |  |  |  |  |
| F                                                                                          | -2.5687950 | 1.6783385  | 2.1277117  | H                                                                                         | 0.5102361  | -4.6884493 | -0.6044718 |  |  |  |  |
| <b>Ac-(4S)Flp-OMe (2S-OMe)<math>\Psi</math> =-34.8° exo trans</b>                          |            |            |            |                                                                                           |            |            |            |  |  |  |  |
| H                                                                                          | -0.2643435 | 2.5263024  | 0.2018485  | H                                                                                         | 0.5458155  | -3.4916330 | 0.7141132  |  |  |  |  |
| C                                                                                          | -0.2801909 | 1.5764831  | 0.7323649  | H                                                                                         | 1.9646873  | -3.7139422 | -0.3064523 |  |  |  |  |
| C                                                                                          | -1.6757915 | 1.0489546  | 1.0020996  | O                                                                                         | 1.5995982  | -0.6486680 | 2.4301181  |  |  |  |  |
| C                                                                                          | -1.4615432 | -0.4370086 | 1.2426641  | N                                                                                         | -0.5002265 | -1.2056546 | 1.8354247  |  |  |  |  |
| N                                                                                          | -0.3729237 | -0.7361059 | 0.3359175  | C                                                                                         | -0.8672202 | -1.3681140 | 3.2296183  |  |  |  |  |
| C                                                                                          | 0.3686272  | 0.4453492  | -0.0724398 | H                                                                                         | -1.3779955 | -0.4759640 | 3.6050469  |  |  |  |  |
| H                                                                                          | 0.2246502  | 1.6985537  | 1.6945440  | H                                                                                         | -1.5427487 | -2.2212389 | 3.3204284  |  |  |  |  |
| H                                                                                          | -2.3447882 | 1.2194869  | 0.1545258  | H                                                                                         | 0.0234613  | -1.5411998 | 3.8272546  |  |  |  |  |
| H                                                                                          | -1.1810681 | -0.5951587 | 2.2910429  | C                                                                                         | -1.6097162 | -1.3081827 | 0.9055682  |  |  |  |  |
| H                                                                                          | -2.3477909 | -1.0305121 | 1.0211386  | H                                                                                         | -1.4805068 | -0.6596450 | 0.0482307  |  |  |  |  |
| C                                                                                          | -0.0263173 | -1.9469557 | -0.1509899 | H                                                                                         | -1.7681891 | -2.3374368 | 0.5700768  |  |  |  |  |
| H                                                                                          | 3.5581494  | -0.9571194 | 2.5795060  | H                                                                                         | -2.5110818 | -0.9805958 | 1.4256407  |  |  |  |  |
| H                                                                                          | 0.2682183  | 0.6050750  | -1.1483856 | F                                                                                         | -0.4649365 | 1.4006791  | -0.4671841 |  |  |  |  |
| C                                                                                          | 1.8568324  | 0.3719450  | 0.2010327  | <b>Ac-(4S)Flp-OMe (2S-OMe)<math>\Psi</math> =-3.0° endo trans</b>                         |            |            |            |  |  |  |  |
| H                                                                                          | 4.0680669  | -0.8890577 | 0.8660577  | H                                                                                         | 2.0402761  | 1.1912243  | 0.4512320  |  |  |  |  |
| O                                                                                          | 0.9150939  | -2.0547323 | -0.9276608 | C                                                                                         | 1.7590201  | 0.4825991  | -0.3260220 |  |  |  |  |
| C                                                                                          | -0.8417962 | -3.1221021 | 0.3068140  | C                                                                                         | 1.3352580  | -0.8818219 | 0.2221882  |  |  |  |  |
| H                                                                                          | -0.8975475 | -3.1642743 | 1.3967778  | N                                                                                         | 0.4530994  | -1.3852124 | -0.8058861 |  |  |  |  |
| H                                                                                          | -0.3833922 | -4.0323546 | -0.0722743 | C                                                                                         | -0.0068442 | -0.3432562 | -1.7127425 |  |  |  |  |
| H                                                                                          | -1.8635266 | -3.0501636 | -0.0750556 | C                                                                                         | 0.5470582  | 0.9333500  | -1.1111775 |  |  |  |  |
| O                                                                                          | 2.6785366  | 0.9233328  | -0.4852926 | H                                                                                         | 2.6021913  | 0.3563971  | -1.0077697 |  |  |  |  |
| O                                                                                          | 2.1331813  | -0.2899322 | 1.3169064  | C                                                                                         | 0.7051027  | -0.7561801 | 1.6015564  |  |  |  |  |
| C                                                                                          | 3.5180661  | -0.3807371 | 1.6586382  | H                                                                                         | 2.1877798  | -1.5502771 | 0.3552505  |  |  |  |  |
| H                                                                                          | 3.9387233  | 0.6138462  | 1.8110717  | H                                                                                         | -0.7276135 | -1.6362779 | 3.6270868  |  |  |  |  |
| F                                                                                          | -2.2492401 | 1.6542075  | 2.1056931  | H                                                                                         | -1.0959186 | -0.2940567 | -1.7717022 |  |  |  |  |
| <b>Ac-(4S)Flp-NMe<sub>2</sub> (2S-NMe<sub>2</sub>)<math>\Psi</math> =170.5° endo trans</b> |            |            |            |                                                                                           |            |            |            |  |  |  |  |
| H                                                                                          | 2.1528812  | 1.1286180  | 0.3898376  | H                                                                                         | 0.3909485  | -0.4899743 | -2.7216129 |  |  |  |  |
| C                                                                                          | 1.8200323  | 0.4520227  | -0.3962554 | H                                                                                         | 0.7548746  | 1.7023831  | -1.8555781 |  |  |  |  |
| C                                                                                          | 1.4811385  | -0.9601720 | 0.0912756  | C                                                                                         | 0.1519078  | -2.6999597 | -0.8828075 |  |  |  |  |
| N                                                                                          | 0.5115971  | -1.4030093 | -0.8814346 | O                                                                                         | 0.6098025  | -3.5028576 | -0.0795030 |  |  |  |  |
| C                                                                                          | -0.1245042 | -0.3066261 | -1.5926230 | C                                                                                         | -0.7696947 | -3.1056681 | -1.9983205 |  |  |  |  |
| C                                                                                          | 0.5337357  | 0.9417508  | -1.0303666 | H                                                                                         | -0.8755800 | -4.1877880 | -1.9887771 |  |  |  |  |
| H                                                                                          | 2.5991410  | 0.3986091  | -1.1596559 | H                                                                                         | -0.3838868 | -2.7842390 | -2.9686481 |  |  |  |  |
| C                                                                                          | 0.8731950  | -0.9849622 | 1.5043859  | H                                                                                         | -1.7523216 | -2.6454256 | -1.8659910 |  |  |  |  |
| H                                                                                          | 2.3414245  | -1.6291142 | 0.0602721  | O                                                                                         | 1.3440146  | -0.3961116 | 2.5593002  |  |  |  |  |
| H                                                                                          | -1.2021418 | -0.2664057 | -1.4175991 | O                                                                                         | -0.5781972 | -1.0707578 | 1.6342674  |  |  |  |  |
| H                                                                                          | 0.0513167  | -0.3812685 | -2.6695171 | C                                                                                         | -1.2103671 | -0.9692279 | 2.9122112  |  |  |  |  |
| H                                                                                          | 0.6864534  | 1.7148385  | -1.7844997 | H                                                                                         | -2.2444543 | -1.2644238 | 2.7538314  |  |  |  |  |
| C                                                                                          | 0.2130574  | -2.7124803 | -1.0102658 | H                                                                                         | -1.1568582 | 0.0558843  | 3.2804618  |  |  |  |  |
| O                                                                                          | 0.7980748  | -3.5663420 | -0.3537390 | F                                                                                         | -0.3924189 | 1.4654631  | -0.2238378 |  |  |  |  |
| C                                                                                          | -0.8621877 | -3.0538717 | -2.0033336 | <b>Ac-(4S)Flp-OMe (2S-OMe)<math>\Psi</math> =160.1° exo cis</b>                           |            |            |            |  |  |  |  |
| H                                                                                          | -0.9528529 | -4.1357556 | -2.0638976 | H                                                                                         | -0.2531517 | 2.5100188  | 0.0071127  |  |  |  |  |
| H                                                                                          | -0.6334114 | -2.6499009 | -2.9923826 | C                                                                                         | -0.2204700 | 1.5986895  | 0.6006001  |  |  |  |  |
| H                                                                                          | -1.8177828 | -2.6281432 | -1.6863535 | C                                                                                         | -1.5859380 | 1.0572555  | 0.9787393  |  |  |  |  |
| O                                                                                          | -0.3248136 | -1.1665802 | 1.6537776  | C                                                                                         | -1.3239739 | -0.4076077 | 1.2751982  |  |  |  |  |
| N                                                                                          | 1.7197642  | -0.7857935 | 2.5386248  | N                                                                                         | -0.3014978 | -0.7367651 | 0.3029228  |  |  |  |  |
| C                                                                                          | 1.2021539  | -0.7380482 | 3.8876455  | C                                                                                         | 0.4256366  | 0.4298741  | -0.1607416 |  |  |  |  |
| H                                                                                          | 1.6705633  | -1.5154658 | 4.4985121  | H                                                                                         | 0.3245144  | 1.7998721  | 1.5270468  |  |  |  |  |
| H                                                                                          | 1.4181471  | 0.2346894  | 4.3403095  | H                                                                                         | -2.3095580 | 1.1749978  | 0.1678415  |  |  |  |  |
| H                                                                                          | 0.1273834  | -0.8951746 | 3.8658802  | H                                                                                         | -0.9601517 | -0.5157632 | 2.3034840  |  |  |  |  |
| C                                                                                          | 3.1426888  | -0.5661956 | 2.4314407  | H                                                                                         | -2.1932405 | -1.0491153 | 1.1431841  |  |  |  |  |
| H                                                                                          | 3.6719513  | -1.2617704 | 3.0891429  | C                                                                                         | -0.1386525 | -2.0045605 | -0.1458438 |  |  |  |  |
| H                                                                                          | 3.5057345  | -0.7212998 | 1.4202653  | H                                                                                         | 4.3598574  | 2.0395883  | -1.0922030 |  |  |  |  |
| H                                                                                          | 3.3999577  | 0.4534683  | 2.7379949  | H                                                                                         | 0.3096222  | 0.5664695  | -1.2389383 |  |  |  |  |
| F                                                                                          | -0.2819439 | 1.4998588  | -0.0465554 | C                                                                                         | 1.9074556  | 0.3791346  | 0.1607249  |  |  |  |  |
| <b>Ac-(4S)Flp-NMe<sub>2</sub> (2S-NMe<sub>2</sub>)<math>\Psi</math> =-7.9° endo cis</b>    |            |            |            |                                                                                           |            |            |            |  |  |  |  |
| H                                                                                          | 1.8777834  | 1.2200203  | 0.4997430  | H                                                                                         | 4.1537006  | 1.6763229  | 0.6482196  |  |  |  |  |
| C                                                                                          | 1.7356001  | 0.5288535  | -0.3290583 | O                                                                                         | -0.8092760 | -2.9234821 | 0.3050586  |  |  |  |  |
| C                                                                                          | 1.3570150  | -0.8862603 | 0.1269943  | C                                                                                         | 0.9019331  | -2.2279119 | -1.2079644 |  |  |  |  |
| N                                                                                          | 0.5841188  | -1.3895482 | -0.9919445 | H                                                                                         | 0.8865575  | -1.4588208 | -1.9824364 |  |  |  |  |
| C                                                                                          | 0.1989184  | -0.3472345 | -1.9334127 | H                                                                                         | 0.7246580  | -3.2013246 | -1.6594510 |  |  |  |  |
| C                                                                                          | 0.6046527  | 0.9364184  | -1.2440993 | H                                                                                         | 1.8945722  | -2.2299424 | -0.7510880 |  |  |  |  |
| H                                                                                          | 2.6593441  | 0.4900011  | -0.9097409 | O                                                                                         | 2.4040269  | -0.2877221 | -1.0292380 |  |  |  |  |
| C                                                                                          | 0.7771998  | -0.8925078 | 1.5510494  | O                                                                                         | 2.5776870  | 1.2129394  | -0.6260064 |  |  |  |  |
| H                                                                                          | 2.2636812  | -1.4815941 | 0.2525224  | C                                                                                         | 3.9824562  | 1.3218986  | -0.3685946 |  |  |  |  |
| H                                                                                          | -0.8714235 | -0.3687337 | -2.1487492 | H                                                                                         | 4.4661813  | 0.3538886  | -0.5012513 |  |  |  |  |
| H                                                                                          | 0.7303755  | -0.4716705 | -2.8810695 | F                                                                                         | -2.0985965 | 1.7124685  | 2.0841017  |  |  |  |  |
| H                                                                                          | 0.8592568  | 1.7362601  | -1.9393789 | <b>Ac-(4S)Flp-NMe<sub>2</sub> (2S-NMe<sub>2</sub>)<math>\Psi</math> =-39.7° exo trans</b> |            |            |            |  |  |  |  |
| C                                                                                          | 0.3558802  | -2.6886570 | -1.2840601 | H                                                                                         | -0.5004242 | 2.6873963  | 0.3191151  |  |  |  |  |
| O                                                                                          | -0.2444056 | -3.0038290 | -2.3046823 | C                                                                                         | -0.5183494 | 1.7336137  | 0.8427188  |  |  |  |  |
|                                                                                            |            |            |            | C                                                                                         | -1.9051119 | 1.1388083  | 0.9779583  |  |  |  |  |
|                                                                                            |            |            |            | C                                                                                         | -1.6498004 | -0.3417441 | 1.2231758  |  |  |  |  |
|                                                                                            |            |            |            | N                                                                                         | -0.4329851 | -0.5842237 | 0.4733939  |  |  |  |  |
|                                                                                            |            |            |            | C                                                                                         | 0.2474857  | 0.6475806  | 0.0866905  |  |  |  |  |

|   |            |            |            |
|---|------------|------------|------------|
| H | -0.1071150 | 1.8813960  | 1.8451506  |
| H | -2.5002448 | 1.2927794  | 0.0742684  |
| H | -1.5158636 | -0.5076437 | 2.3000730  |
| H | -2.4703272 | -0.9700560 | 0.8786103  |
| C | -0.0099244 | -1.7778464 | 0.0010448  |
| H | 0.1405176  | 0.7881410  | -0.9917854 |
| C | 1.7592865  | 0.7406526  | 0.2940308  |
| O | 0.9871137  | -1.8522231 | -0.7053118 |
| C | -0.8126862 | -2.9854145 | 0.3975078  |
| H | -1.0057675 | -3.0068324 | 1.4721417  |
| H | -0.2643294 | -3.8775153 | 0.1041483  |
| H | -1.7798010 | -2.9800795 | -0.1125120 |
| O | 2.3928358  | 1.3483488  | -0.5616301 |
| N | 2.3393570  | 0.2314281  | 1.3990159  |
| C | 3.7830799  | 0.2445202  | 1.5039080  |
| H | 4.1480876  | -0.7721005 | 1.6755598  |
| H | 4.2087102  | 0.6311178  | 0.5823864  |
| H | 4.1008912  | 0.8746054  | 2.3399547  |
| C | 1.6608250  | -0.4290337 | 2.4901799  |
| H | 0.6511638  | -0.0556287 | 2.6299186  |
| H | 1.6240986  | -1.5143302 | 2.3484464  |
| H | 2.2125817  | -0.2247361 | 3.4097142  |
| F | -2.6086672 | 1.6975938  | 2.0309186  |

**Ac-(4S)Flp-OMe (2S-OMe) $\Psi$  =-176.2° endo cis**

|   |            |            |            |
|---|------------|------------|------------|
| H | 2.2244757  | 1.2071430  | 0.4201607  |
| C | 1.8779391  | 0.4906666  | -0.3218843 |
| C | 1.4441579  | -0.8517495 | 0.2757175  |
| N | 0.5268021  | -1.3589723 | -0.7158924 |
| C | 0.0148713  | -0.3118239 | -1.5895502 |
| C | 0.6336686  | 0.9576243  | -1.0444269 |
| H | 2.6745228  | 0.3212483  | -1.0488019 |
| C | 0.7923818  | -0.7081374 | 1.6477419  |
| H | 2.3044047  | -1.5123583 | 0.4077458  |
| H | 0.2870545  | 0.6596054  | 3.8506101  |
| H | -1.0750010 | -0.2633054 | -1.5634260 |
| H | 0.3219335  | -0.4917765 | -2.6233095 |
| H | 0.8182542  | 1.7116070  | -1.8097630 |
| C | 0.1452843  | -2.6439165 | -0.8869016 |
| O | -0.6393723 | -2.9460647 | -1.7775181 |
| C | 0.7384016  | -3.6650658 | 0.0438342  |
| H | 0.3287204  | -4.6400283 | -0.2090352 |
| H | 0.4998951  | -3.4296438 | 1.0826612  |
| H | 1.8264046  | -3.6976537 | -0.0557722 |
| O | -0.3191313 | -1.0685427 | 1.9278925  |
| C | 1.6444785  | -0.1622004 | 2.5091723  |
| C | 1.1596771  | 0.0058679  | 3.8453777  |
| H | 1.9773671  | 0.4567326  | 4.4017692  |
| H | 0.8910105  | -0.9598559 | 4.2746379  |
| F | -0.2340895 | 1.5286382  | -0.1075196 |

**Ac-(4S)Flp-NMe<sub>2</sub>(2S-NMe<sub>2</sub>) $\Psi$  =-10.0° endo trans**

|   |            |            |            |
|---|------------|------------|------------|
| H | 1.8752755  | 1.1155509  | 0.4528961  |
| C | 1.6896419  | 0.4326923  | -0.3741774 |
| C | 1.2460321  | -0.9611826 | 0.0849681  |
| N | 0.4057790  | -1.4144537 | -1.0085029 |
| C | 0.0962241  | -0.3598279 | -1.9634185 |
| C | 0.5697910  | 0.9012403  | -1.2731805 |
| H | 2.6035597  | 0.3531666  | -0.9663184 |
| C | 0.7232618  | -0.9484794 | 1.5283629  |
| H | 2.1039804  | -1.6310484 | 0.1678338  |
| H | -0.9709991 | -0.3003785 | -2.1891211 |
| H | 0.6391592  | -0.4997399 | -2.9034961 |
| H | 0.8522821  | 1.6903843  | -1.9702110 |
| C | 0.1391312  | -2.7283050 | -1.1782976 |
| O | 0.5052741  | -3.5593785 | -0.3566388 |
| C | -0.6439529 | -3.0959879 | -2.4072712 |
| H | -0.7679886 | -4.1758382 | -2.4331022 |
| H | -0.1329645 | -2.7652432 | -3.3147277 |
| H | -1.6277541 | -2.6192108 | -2.3932989 |
| O | 1.5960476  | -0.7562163 | 2.3724237  |
| N | -0.5615205 | -1.1564676 | 1.8656148  |
| C | -0.8888568 | -1.2989657 | 3.2709058  |
| H | -1.4273930 | -0.4180411 | 3.6338347  |
| H | -1.5263201 | -2.1764985 | 3.4037930  |
| H | 0.0227928  | -1.4203237 | 3.8486506  |

|   |            |            |            |
|---|------------|------------|------------|
| C | -1.6985065 | -1.2548665 | 0.9725545  |
| H | -2.5820833 | -0.9272867 | 1.5220395  |
| H | -1.5944946 | -0.6013294 | 0.1140408  |
| H | -1.8649355 | -2.2845991 | 0.6430637  |
| F | -0.4710478 | 1.4076981  | -0.4859328 |

**Ac-(4S)Flp-NMe<sub>2</sub>(2S-NMe<sub>2</sub>) $\Psi$  =163.1° exo cis**

|   |            |            |            |
|---|------------|------------|------------|
| H | -0.4491076 | 2.4458353  | -0.3122734 |
| C | -0.2972751 | 1.6221759  | 0.3834302  |
| C | -1.5832425 | 1.1103082  | 1.0050187  |
| C | -1.2412542 | -0.3062377 | 1.4242664  |
| N | -0.3748600 | -0.7314769 | 0.3475899  |
| C | 0.3098086  | 0.3797961  | -0.2898517 |
| H | 0.3488240  | 1.9682422  | 1.1948312  |
| H | -2.4137040 | 1.1223832  | 0.2942520  |
| H | -0.7179006 | -0.2903410 | 2.3879020  |
| H | -2.1024867 | -0.9666890 | 1.5030289  |
| C | -0.2475001 | -2.0363996 | 0.0158061  |
| H | 0.0919926  | 0.3714429  | -1.3594495 |
| C | 1.8233744  | 0.3346405  | -0.0448045 |
| O | -0.8407147 | -2.9090226 | 0.6379598  |
| C | 0.6476088  | -2.3619418 | -1.1478150 |
| H | 0.4763842  | -1.7039708 | -2.0021255 |
| H | 0.4648582  | -3.3929421 | -1.4417245 |
| H | 1.6918893  | -2.2583141 | -0.8445686 |
| O | 2.2663620  | -0.3471671 | 0.8681795  |
| N | 2.6068434  | 1.0839522  | -0.8476755 |
| C | 4.0324180  | 1.1324838  | -0.6020157 |
| H | 4.3214216  | 2.1145689  | -0.2142396 |
| H | 4.3005832  | 0.3691334  | 0.1228407  |
| H | 4.5711935  | 0.9567208  | -1.5364879 |
| C | 2.1413966  | 1.9993395  | -1.8647085 |
| H | 2.7124022  | 1.8436684  | -2.7835841 |
| H | 1.0901085  | 1.8562399  | -2.0942571 |
| H | 2.2863404  | 3.0363044  | -1.5441315 |
| F | -1.9615668 | 1.8846899  | 2.0885677  |

**Ac-(4S)Flp-OMe (2S-OMe) $\Psi$  =145.6° exo trans**

|   |            |            |            |
|---|------------|------------|------------|
| H | -0.3270535 | 2.5474913  | 0.1475727  |
| C | -0.3012540 | 1.6045706  | 0.6902718  |
| C | -1.6747696 | 1.0504526  | 1.0169443  |
| C | -1.4176909 | -0.4268279 | 1.2678020  |
| N | -0.3634878 | -0.7123606 | 0.3179217  |
| C | 0.3460120  | 0.4767843  | -0.1194596 |
| H | 0.2342637  | 1.7487579  | 1.6325527  |
| H | -2.3779649 | 1.1945079  | 0.1924142  |
| H | -1.0878072 | -0.5644639 | 2.3044687  |
| H | -2.2987220 | -1.0428230 | -1.0917352 |
| C | -0.0134616 | -1.9175543 | -0.1800767 |
| H | 4.3874285  | 1.5169001  | -1.3931649 |
| H | 0.2197676  | 0.6210372  | -1.1946936 |
| C | 1.8294919  | 0.3781492  | 0.1824210  |
| H | 4.2012792  | 1.5086314  | 0.3871175  |
| O | 0.8932263  | -2.0070383 | -0.9996801 |
| C | -0.7829072 | -3.1077565 | 0.3160907  |
| H | -0.7872984 | -3.1473702 | 1.4074791  |
| H | -0.3233942 | -4.0095342 | -0.0814316 |
| H | -1.8222322 | -3.0578247 | -0.0189514 |
| O | 2.2862974  | -0.1204481 | 1.1775898  |
| O | 2.5493042  | 0.9766457  | -0.7580192 |
| C | 3.9633946  | 0.9899209  | -0.5422591 |
| H | 4.3453946  | -0.0302867 | -0.4955244 |
| F | -2.2211955 | 1.6584499  | 2.1326466  |

**Ac-(4S)Flp-OMe (2S-OMe) $\Psi$  =-30.6° exo cis**

|   |            |            |            |
|---|------------|------------|------------|
| H | -0.2669299 | 2.5459401  | 0.2110715  |
| C | -0.2676823 | 1.5935744  | 0.7371780  |
| C | -1.6515665 | 1.0319904  | 1.0007832  |
| C | -1.4055894 | -0.4505028 | 1.2121741  |
| N | -0.3228644 | -0.7160628 | 0.2865971  |
| C | 0.4174918  | 0.4823541  | -0.0728011 |
| H | 0.2277407  | 1.7231086  | 1.7032036  |
| H | -2.3290125 | 1.2069990  | 0.1609061  |
| H | -1.1075840 | -0.6293272 | 2.2518024  |
| H | -2.2639459 | -1.0794318 | 0.9829471  |
| C | -0.1133621 | -1.9559797 | -0.2153744 |
| H | 3.5730477  | -0.9381920 | 2.6148202  |

|   |            |            |            |   |            |            |            |
|---|------------|------------|------------|---|------------|------------|------------|
| H | 0.3439444  | 0.6863397  | -1.1436537 | C | 1.6685013  | 0.5508769  | -0.2334546 |
| C | 1.8970320  | 0.4620276  | 0.2585847  | C | 1.3968136  | -0.8691921 | 0.2699121  |
| H | 4.1705352  | -0.6796094 | 0.9478142  | N | 0.5631477  | -0.4278062 | -0.7736452 |
| O | -0.7932675 | -2.9067299 | 0.1469998  | C | -0.0195374 | -0.4192037 | -1.6416159 |
| C | 0.9951434  | -2.1065805 | -1.2204466 | C | 0.3993253  | 0.8923716  | -0.9924628 |
| H | 1.0042248  | -1.3053960 | -1.9614170 | H | 2.4992414  | 0.5264149  | -0.9421311 |
| H | 0.8749641  | -3.0647127 | -1.7207021 | C | 0.7539706  | -0.8230247 | 1.6495485  |
| H | 1.9613207  | -2.1037866 | -0.7088072 | H | 2.3279470  | -1.4238427 | 0.3901179  |
| O | 2.7134684  | 1.0906851  | -0.3653051 | H | -0.9545836 | -1.6055128 | 3.5018963  |
| O | 2.1688348  | -0.2702906 | 1.3289861  | H | -1.1008137 | -0.5419875 | -1.7088675 |
| C | 3.5385062  | -0.2873955 | 1.7451870  | H | 0.3958668  | -0.4801417 | -2.6523248 |
| H | 3.8666704  | 0.7193640  | 2.0049712  | H | -0.3787839 | 1.2790141  | -0.3305302 |
| F | -2.2255033 | 1.6113283  | 2.1182124  | C | 0.2634416  | -2.7362766 | -0.9335974 |

**Ac-(4R)Flp-OMe (2R-OMe)and Ac-(4R)Flp-NMe<sub>2</sub> (2R-NMe<sub>2</sub>)**

**Ac-(4R)Flp-NMe<sub>2</sub>(2R-NMe<sub>2</sub>) $\Psi$  =165.4° endo cis**

|   |            |            |            |
|---|------------|------------|------------|
| H | 2.1180491  | 1.1740931  | 0.4298208  |
| C | 1.7716645  | 0.5102708  | -0.3613483 |
| C | 1.5211462  | -0.9243729 | 0.1094681  |
| N | 0.5737787  | -1.4156771 | -0.8682519 |
| C | -0.1074125 | -0.3539682 | -1.5859649 |
| C | 0.4241302  | 0.9131680  | -0.9325448 |
| H | 2.5060919  | 0.5096980  | -1.1703487 |
| C | 0.9188518  | -0.9368095 | 1.5252326  |
| H | 2.4329181  | -1.5201004 | 0.0775599  |
| H | -1.1893349 | -0.4600408 | -1.5012541 |
| H | 0.1568287  | -0.3615083 | -2.6481460 |
| H | -0.2516499 | 1.2759153  | -0.1554314 |
| C | 0.2129298  | -2.7049573 | -1.0409309 |
| O | -0.6418203 | -3.0128940 | -1.8626188 |
| C | 0.9186472  | -3.7285477 | -0.1938272 |
| H | 0.5403510  | -4.7133030 | -0.4572915 |
| H | 0.7357403  | -3.5457765 | 0.8675453  |
| H | 1.9982979  | -3.7026584 | -0.3605023 |
| O | -0.2908873 | -1.0528549 | 1.6653804  |
| N | 1.7677853  | -0.7960564 | 2.5638303  |
| C | 1.2423324  | -0.7401441 | 3.9110931  |
| H | 1.7785895  | -1.4515659 | 4.5444276  |
| H | 1.3711067  | 0.2627813  | 4.3302095  |
| H | 0.1851621  | -0.9897237 | 3.8973090  |
| C | 3.1915033  | -0.5685187 | 2.4644211  |
| H | 3.7243391  | -1.2900749 | 3.0897165  |
| H | 3.5540121  | -0.6698561 | 1.4465096  |
| H | 3.4410547  | 0.4376508  | 2.8170522  |
| F | 0.5576759  | 1.9347257  | -1.8606414 |

**Ac-(4R)Flp-OMe(2R-OMe) $\Psi$  =152.6° endo trans**

|   |            |            |            |
|---|------------|------------|------------|
| H | 1.9929546  | 1.3856461  | 0.3827807  |
| C | 1.7367812  | 0.6535174  | -0.3820940 |
| C | 1.4375036  | -0.7354349 | 0.1860075  |
| N | 0.5269561  | -1.3042424 | -0.7860364 |
| C | 0.0327974  | -0.3366753 | -1.7472863 |
| C | 0.4686142  | 0.9913772  | -1.1430785 |
| H | 2.5627930  | 0.5861393  | -1.0936378 |
| C | 0.7789543  | -0.6298212 | 1.5519937  |
| H | 2.3363374  | -1.3439341 | 0.2858036  |
| H | 0.6999425  | 0.4391077  | 3.9632652  |
| H | -1.0485397 | -0.4022586 | -1.8682393 |
| H | 0.5063984  | -0.4562235 | -2.7284052 |
| H | -0.3023438 | 1.3982557  | -0.4853723 |
| C | 0.1457474  | -2.5947550 | -0.6681964 |
| O | 0.5819458  | -3.2907555 | 0.2409806  |
| C | -0.8241978 | -3.1078591 | -1.6929428 |
| H | -0.9111872 | -4.1862517 | -1.5831501 |
| H | -0.5046850 | -2.8629489 | -2.7079041 |
| H | -1.8063964 | -2.6538300 | -1.5355298 |
| O | -0.3992047 | -0.4588831 | 1.7313580  |
| O | 1.6853959  | -0.6866391 | 2.5194594  |
| C | 1.1868720  | -0.5303243 | 3.8516911  |
| H | 2.0552432  | -0.5985711 | 4.5018651  |
| H | 0.4738988  | -1.3224876 | 4.0816098  |
| F | 0.7020915  | 1.9311751  | -2.1327604 |

**Ac-(4R)Flp-OMe(2R-OMe) $\Psi$  =-22.2° endo cis**

|   |           |           |           |
|---|-----------|-----------|-----------|
| H | 1.9078855 | 1.2503046 | 0.5662067 |
|---|-----------|-----------|-----------|

|   |            |            |            |
|---|------------|------------|------------|
| C | 1.6685013  | 0.5508769  | -0.2334546 |
| C | 1.3968136  | -0.8691921 | 0.2699121  |
| N | 0.5631477  | -0.4278062 | -0.7736452 |
| C | -0.0195374 | -0.4192037 | -1.6416159 |
| C | 0.3993253  | 0.8923716  | -0.9924628 |
| H | 2.4992414  | 0.5264149  | -0.9421311 |
| C | 0.7539706  | -0.8230247 | 1.6495485  |
| H | 2.3279470  | -1.4238427 | 0.3901179  |
| H | -0.9545836 | -1.6055128 | 3.5018963  |
| H | -1.1008137 | -0.5419875 | -1.7088675 |
| H | 0.3958668  | -0.4801417 | -2.6523248 |
| H | -0.3787839 | 1.2790141  | -0.3305302 |
| C | 0.2634416  | -2.7362766 | -0.9335974 |
| O | -0.4740127 | -3.1036737 | -1.8386854 |
| C | 0.8827590  | -3.6980896 | 0.0430726  |
| H | 0.5534047  | -4.7034389 | -0.2076016 |
| H | 0.5818673  | -3.4704868 | 1.0688038  |
| H | 1.9736336  | -3.6552326 | 0.0000278  |
| O | 1.3997883  | -0.7312607 | -2.6521215 |
| O | -0.5704192 | -0.8532769 | 1.6034162  |
| C | -1.2438081 | -0.7695035 | 2.8646592  |
| H | -2.3049281 | -0.8138120 | 2.6345161  |
| H | -0.9965431 | 0.1682889  | 3.3627015  |
| F | 0.6330467  | 1.8661517  | -1.9494011 |

**Ac-(4R)Flp-NMe<sub>2</sub>(2R-NMe<sub>2</sub>) $\Psi$  =131.1° exo trans**

|   |            |            |            |
|---|------------|------------|------------|
| H | -0.5713423 | 2.6450991  | 0.4357937  |
| C | -0.4113017 | 1.6722123  | 0.8985430  |
| C | -1.7086287 | 1.0175921  | 1.3143510  |
| C | -1.3580623 | -0.4501381 | 1.3968471  |
| N | -0.3746694 | -0.6055763 | 0.3412463  |
| C | 0.2389523  | 0.6564528  | -0.0474576 |
| H | 0.2134447  | 1.7970322  | 1.7855836  |
| H | -2.1345925 | 1.4152181  | 2.2361863  |
| H | -0.9351116 | -0.6783661 | 2.3815385  |
| H | -2.2363451 | -1.0750669 | 1.2353028  |
| C | -0.0323021 | -1.7444737 | -0.2880708 |
| H | -0.0120732 | 0.8662790  | -1.0859756 |
| C | 1.7500687  | 0.6063109  | 0.1849083  |
| O | 0.7910813  | -1.7336439 | -1.1992647 |
| C | -0.7050180 | -3.0059282 | 0.1758478  |
| H | -0.6083223 | -3.1321975 | 1.2563518  |
| H | -0.2487219 | -3.8513586 | -0.3336701 |
| H | -1.7717819 | -2.9791784 | -0.0615839 |
| O | 2.1595617  | 0.2640085  | 1.2891775  |
| N | 2.5571773  | 1.0027454  | -0.8139631 |
| C | 3.9895942  | 0.9924930  | -0.6072511 |
| H | 4.4261332  | 1.9093793  | -1.0087959 |
| H | 4.1978250  | 0.9270787  | 0.4574361  |
| H | 4.4486467  | 0.1354102  | -1.1106616 |
| C | 2.0940983  | 1.2260194  | -2.1726351 |
| H | 1.5757504  | 0.3452371  | -2.5569864 |
| H | 1.4401096  | 2.0980047  | -2.2442036 |
| H | 2.9639292  | 1.4134279  | -2.7998994 |
| F | -2.6615513 | 1.1983846  | 0.3070753  |

**Ac-(4R)Flp-NMe<sub>2</sub>(2R-NMe<sub>2</sub>) $\Psi$  =-38.5° exo cis**

|   |            |            |            |
|---|------------|------------|------------|
| H | -0.1681363 | 2.4655384  | 0.2951466  |
| C | -0.2333898 | 1.4970083  | 0.7876963  |
| C | -1.6609208 | 1.0867283  | 1.0718274  |
| C | -1.5885274 | -0.4158475 | 1.2090567  |
| N | -0.5067998 | -0.7864816 | 0.3096668  |
| C | 0.2998399  | 0.3583464  | -0.0925786 |
| H | 0.3146867  | 1.5577361  | 1.7308953  |
| H | -2.1030298 | 1.5821272  | 1.9368070  |
| H | -1.3719471 | -0.6995689 | 2.2453483  |
| H | -2.5180186 | -0.9035381 | 0.9166443  |
| C | -0.4432475 | -2.0334976 | -0.2117918 |
| H | 0.11110041 | 0.5967855  | -1.1422785 |
| C | 1.8228088  | 0.2406155  | -0.0205686 |
| O | -1.2088396 | -2.9114403 | 0.1680129  |
| C | 0.6114133  | -2.2909890 | -1.2514282 |
| H | 0.6800939  | -1.4850524 | -1.9841517 |
| H | 0.3753241  | -3.2266116 | -1.7530258 |
| H | 1.5906446  | -2.3883943 | -0.7752279 |
| O | 2.4619051  | 0.7798144  | -0.9176754 |
| N | 2.4153635  | -0.4137074 | 0.9975254  |

|   |            |            |            |
|---|------------|------------|------------|
| C | 3.8525272  | -0.5935732 | 0.9747504  |
| H | 4.0898510  | -1.6388563 | 1.1882199  |
| H | 4.2368674  | -0.3247296 | -0.0052932 |
| H | 4.3327473  | 0.0339085  | 1.7315509  |
| C | 1.7503405  | -0.9795411 | 2.1519269  |
| H | 2.4072514  | -0.8630247 | 3.0158418  |
| H | 0.8208003  | -0.4687810 | 2.3795729  |
| H | 1.5428945  | -2.0460797 | 2.0199599  |
| F | -2.4497858 | 1.4032677  | -0.0363471 |

**Ac-(4R)Flp-OMe(2R-OMe) $\Psi$  = -35.8° exo trans**

|   |            |            |            |
|---|------------|------------|------------|
| H | -0.2846283 | 2.5309103  | 0.2947118  |
| C | -0.2709079 | 1.5701016  | 0.8057390  |
| C | -1.6610707 | 1.0513407  | 1.0987936  |
| C | -1.4618155 | -0.4366832 | 1.2778697  |
| N | -0.3669740 | -0.7310024 | 0.3693152  |
| C | 0.3630266  | 0.4547642  | -0.0374753 |
| H | 0.2639997  | 1.6840045  | 1.7517720  |
| H | -2.1451241 | 1.5303890  | 1.9504641  |
| H | -1.1977405 | -0.6586654 | 2.3177994  |
| H | -2.3679380 | -0.9857938 | 1.0214100  |
| C | -0.0324015 | -1.9376538 | -0.1334403 |
| H | 3.6109115  | -0.9603973 | 2.5356851  |
| H | 0.2341573  | 0.6371856  | -1.1066639 |
| C | 1.8562175  | 0.3771207  | 0.2001553  |
| H | 4.0760154  | -0.8950800 | 0.8095995  |
| O | 0.9034844  | -2.0481881 | -0.9168434 |
| C | -0.8580230 | -3.1097580 | 0.3156445  |
| H | -0.9180872 | -3.1591463 | 1.4050888  |
| H | -0.4063324 | -4.0213870 | -0.0681807 |
| H | -1.8778253 | -3.0265953 | -0.0693764 |
| O | 2.6646917  | 0.9258985  | -0.5037233 |
| O | 2.1571686  | -0.2850300 | 1.3106796  |
| C | 3.5497895  | -0.3835834 | 1.6161788  |
| H | 3.9805472  | 0.6083775  | 1.7573691  |
| F | -2.4732552 | 1.2661939  | -0.0160273 |

**Ac-(4R)Flp-NMe<sub>2</sub>(2R-NMe<sub>2</sub>) $\Psi$  = 130.6° endo trans**

|   |            |            |            |
|---|------------|------------|------------|
| H | 1.7426668  | 1.6753161  | 0.1733839  |
| C | 1.5265516  | 0.8905331  | -0.5505476 |
| C | 1.5039260  | -0.5070025 | 0.0674174  |
| N | 0.5947416  | -1.2348052 | -0.8053759 |
| C | -0.1802164 | -0.3744104 | -1.6789994 |
| C | 0.1560103  | 1.0286600  | -1.1873970 |
| H | 2.2777428  | 0.9255844  | -1.3434160 |
| C | 0.9331324  | -0.4483573 | 1.4862519  |
| H | 2.4849761  | -0.9735155 | 0.0378343  |
| H | -1.2476634 | -0.5884115 | -1.6134989 |
| H | 0.1344228  | -0.4700064 | -2.7242169 |
| H | -0.5864951 | 1.3917863  | -0.4780191 |
| C | 0.4817785  | -2.5721462 | -0.6919634 |
| O | 1.1563560  | -3.1924354 | 0.1255684  |
| C | -0.5024467 | -3.2448133 | -1.6056489 |
| H | -0.3901305 | -4.3222607 | -1.5105608 |
| H | -0.3515547 | -2.9475221 | -2.6456063 |
| H | -1.5223330 | -2.9656700 | -1.3273817 |
| O | -0.2143005 | -0.0362575 | 1.6366007  |
| N | 1.7340596  | -0.7933140 | 2.5078470  |
| C | 1.2602223  | -0.6376411 | 3.8666296  |
| H | 1.0588168  | -1.6132446 | 4.3195760  |
| H | 2.0173036  | -0.1247475 | 4.4644962  |
| H | 0.3437164  | -0.0535651 | 3.8626724  |
| C | 3.0298361  | -1.4283042 | 2.3388481  |
| H | 2.9691965  | -2.2435054 | 1.6174744  |
| H | 3.8002721  | -0.7152247 | 2.0326538  |
| H | 3.3264550  | -1.8507175 | 3.2979326  |
| F | 0.1836872  | 1.9214959  | -2.2516788 |

**Ac-(4R)Flp-NMe<sub>2</sub>(2R-NMe<sub>2</sub>) $\Psi$  = -16.9° endo cis**

|   |           |            |            |
|---|-----------|------------|------------|
| H | 1.7353165 | 1.2339081  | 0.5263212  |
| C | 1.6252263 | 0.5565103  | -0.3184958 |
| C | 1.3468290 | -0.8865171 | 0.1129522  |
| N | 0.5892510 | -1.4271242 | -1.0017915 |
| C | 0.1499682 | -0.4142653 | -1.9449503 |
| C | 0.4627054 | 0.8929952  | -1.2316113 |
| H | 2.5404948 | 0.5883217  | -0.9138310 |

|   |            |            |            |
|---|------------|------------|------------|
| C | 0.7764116  | -0.9623511 | 1.5387097  |
| H | 2.2925329  | -1.4206882 | 0.2199771  |
| H | -0.9060239 | -0.5366504 | -2.1916680 |
| H | 0.7206766  | -0.4695776 | -2.8773608 |
| H | -0.3984770 | 1.2699769  | -0.6731448 |
| C | 0.3855615  | -2.7384183 | -1.2619077 |
| O | -0.2210526 | -3.0897129 | -2.2660543 |
| C | 0.9340150  | -3.7215817 | -0.2654294 |
| H | 0.6441270  | -4.7232160 | -0.5730910 |
| H | 0.5556182  | -3.5267401 | 0.7406108  |
| H | 2.0244448  | -3.6600251 | -0.2232758 |
| O | 1.6059844  | -0.8189822 | 2.4316852  |
| N | -0.5224713 | -1.2028323 | 1.8007578  |
| C | -0.9150033 | -1.4229024 | 3.1800729  |
| H | -1.4042779 | -0.5350063 | 3.5918168  |
| H | -1.6166261 | -2.2588804 | 3.2209504  |
| H | -0.0377343 | -1.6519125 | 3.7785878  |
| C | -1.6224960 | -1.2107936 | 0.8560001  |
| H | -2.5124438 | -0.8521240 | -1.3750224 |
| H | -1.4517692 | -0.5452301 | 0.0177934  |
| H | -1.8312378 | -2.2154795 | 0.4767876  |
| F | 0.8010167  | 1.8797604  | -2.1425493 |

**Ac-(4R)Flp-OMe(2R-OMe) $\Psi$  = -28.5° endo trans**

|   |            |            |            |
|---|------------|------------|------------|
| H | 1.8575131  | 1.2275007  | 0.5891867  |
| C | 1.6453092  | 0.5602130  | -0.2450417 |
| C | 1.3839816  | -0.8836924 | 0.1907627  |
| N | 0.5064293  | -1.3912226 | -0.8460226 |
| C | 0.0119083  | -0.3598982 | -1.7383201 |
| C | 0.3878260  | 0.9239451  | -1.0111361 |
| H | 2.4909510  | 0.5839863  | -0.9360407 |
| C | 0.7814738  | -0.9385616 | -0.9849246 |
| H | 2.3038999  | -1.4662931 | 0.2452396  |
| H | -0.9464954 | -1.8021722 | 3.3758961  |
| H | -1.0625885 | -0.4460986 | -1.9009543 |
| H | 0.5186258  | -0.3814740 | -2.7098184 |
| H | -0.4134830 | 1.2511091  | -0.3449903 |
| C | 0.1583174  | -2.6962513 | -0.8494783 |
| O | 0.5849320  | -3.4550732 | 0.0125523  |
| C | -0.7677717 | -3.1450517 | -1.9429701 |
| H | -0.8279771 | -4.2307123 | -1.9263028 |
| H | -0.4263617 | -2.8077506 | -2.9237130 |
| H | -1.7666462 | -2.7311305 | -1.7792446 |
| O | 1.4517833  | -0.9939106 | 2.5873227  |
| O | -0.5427394 | -0.8499981 | 1.5763504  |
| C | -1.1761297 | -0.8703703 | 2.8584325  |
| H | -2.2427739 | -0.7966716 | 2.6622232  |
| H | -0.8382053 | -0.0277837 | 3.4626297  |
| F | 0.6153996  | 1.9511477  | -1.9108774 |

**Ac-(4R)Flp-OMe(2R-OMe) $\Psi$  = 155.8° exo cis**

|   |            |            |            |
|---|------------|------------|------------|
| H | -0.2454167 | 2.5446157  | 0.1823391  |
| C | -0.2064547 | 1.6000168  | 0.7216251  |
| C | -1.5780017 | 1.0715312  | 1.0742337  |
| C | -1.3512738 | -0.4053566 | 1.2832710  |
| N | -0.2992925 | -0.7146737 | 0.3282594  |
| C | 0.4172493  | 0.4646558  | -0.1117218 |
| H | 0.3571390  | 1.7458708  | 1.6463554  |
| H | -2.0366980 | 1.5696486  | 1.9288926  |
| H | -1.0321734 | -0.6036535 | 2.3117350  |
| H | -2.2432797 | -0.9963868 | 1.0790859  |
| C | -0.1386651 | -1.9708313 | -0.1482977 |
| H | 4.3501274  | 1.9712004  | -1.2119285 |
| H | 0.2660406  | 0.6495516  | -1.1783213 |
| C | 1.9058356  | 0.4017171  | 0.1674033  |
| H | 4.1860023  | 1.6751911  | 0.5457443  |
| O | -0.8179144 | -2.8961314 | 0.2779476  |
| C | 0.9094807  | -2.1763219 | -1.2065367 |
| H | 0.9062612  | -1.3866568 | -1.9603169 |
| H | 0.7286095  | -3.1361500 | -1.6849946 |
| H | 1.8982658  | -2.1987861 | -0.7416579 |
| O | 2.4163422  | -0.2376425 | 1.0491197  |
| O | 2.5681580  | 0.1936023  | -0.6679627 |
| C | 3.9807333  | 1.2872482  | -0.4523889 |
| H | 4.4444986  | 0.3066392  | -0.5621490 |
| F | -2.4275289 | 1.2530084  | -0.0194697 |



**Ac-(4R)Flp-NMe<sub>2</sub>(2R-NMe<sub>2</sub>)Ψ = -39.9° exo trans**

|   |            |            |            |
|---|------------|------------|------------|
| H | -0.5464389 | 2.6898688  | 0.3820947  |
| C | -0.5226260 | 1.7328014  | 0.9000721  |
| C | -1.9024332 | 1.1380507  | 1.0719072  |
| C | -1.6412925 | -0.3389313 | 1.2727571  |
| N | -0.4322915 | -0.5764881 | 0.5005201  |
| C | 0.2366829  | 0.6587240  | 0.1147895  |
| H | -0.0782515 | 1.8902932  | 1.8860894  |
| H | -2.4878510 | 1.5862501  | 1.8754469  |
| H | -1.4956249 | -0.5543546 | 2.3383651  |
| H | -2.4820950 | -0.9334961 | 0.9154157  |
| C | -0.0210133 | -1.7668087 | 0.0120236  |
| H | 0.1066385  | 0.8148997  | -0.9586057 |
| C | 1.7507211  | 0.7513110  | 0.2979682  |
| O | 0.9668429  | -1.8434440 | -0.7072810 |
| C | -0.8282402 | -2.9726208 | 0.4066322  |
| H | -1.0074299 | -3.0044920 | 1.4834873  |
| H | -0.2912727 | -3.8660322 | 0.0967077  |
| H | -1.8018968 | -2.9537823 | -0.0905211 |
| O | 2.3721380  | 1.3653575  | -0.5618486 |
| N | 2.3485979  | 0.2341830  | 1.3908132  |
| C | 3.7938631  | 0.2416346  | 1.4707287  |
| H | 4.1594926  | -0.7786377 | 1.6183981  |
| H | 4.2041161  | 0.6428242  | 0.5484703  |
| H | 4.1282174  | 0.8565675  | 2.3116055  |
| C | 1.6874153  | -0.4368780 | 2.4859172  |
| H | 0.6808500  | -0.0632457 | 2.6468284  |
| H | 1.6454397  | -1.5205586 | 2.3332757  |
| H | 2.2552488  | -0.2437974 | 3.3981442  |
| F | -2.6228706 | 1.3093762  | -0.1114106 |

**Ac-(4R)Flp-OMe(2R-OMe)Ψ = 164.7° endo cis**

|   |            |            |            |
|---|------------|------------|------------|
| H | 2.0698686  | 1.2928798  | 0.4319715  |
| C | 1.7637359  | 0.5710691  | -0.3236829 |
| C | 1.4363304  | -0.8077991 | 0.2557839  |
| N | 0.5365668  | -1.3684729 | -0.7269554 |
| C | -0.0224587 | -0.3712126 | -1.6231812 |
| C | 0.4818341  | 0.9433743  | -1.0459203 |
| H | 2.5623783  | 0.4712964  | -1.0620023 |
| C | 0.7831325  | -0.6660173 | 1.6245001  |
| H | 2.3409906  | -1.4061444 | 0.3728916  |
| H | 0.5783980  | 0.6302449  | 3.9162608  |
| H | -1.1098770 | -0.4413667 | -1.6525702 |
| H | 0.3578266  | -0.4974894 | -2.6418831 |
| H | -0.2498236 | 1.3904373  | -0.3689436 |
| C | 0.1673793  | -2.6660324 | -0.8190902 |
| O | -0.6144245 | -3.0334798 | -1.6859106 |
| C | 0.7682957  | -3.6164661 | 0.1798849  |
| H | 0.3950896  | -4.6160779 | -0.0289135 |
| H | 0.4909937  | -3.3382827 | 1.1994726  |
| H | 1.8590374  | -3.6193288 | 0.1164149  |
| O | -0.4012234 | -0.7006828 | 1.8319934  |
| O | 1.7057779  | -0.4681410 | 2.5583722  |
| C | 1.2166151  | -0.2533234 | 3.8872512  |
| H | 2.0981676  | -0.1084982 | 4.5061463  |
| H | 0.6496971  | -1.1211140 | 4.2253086  |
| F | 0.7203971  | 1.8678253  | -2.0493446 |

**Ac-(4R)Flp-NMe<sub>2</sub>(2R-NMe<sub>2</sub>)Ψ = -19.6° endo trans**

|   |            |            |            |
|---|------------|------------|------------|
| H | 1.7736818  | 1.1423491  | 0.5198654  |
| C | 1.6113949  | 0.4846376  | -0.3320155 |
| C | 1.2633887  | -0.9477580 | 0.0830370  |
| N | 0.4227834  | -1.4199790 | -1.0044232 |
| C | 0.0622256  | -0.3770638 | -1.9466460 |
| C | 0.4484967  | 0.8988937  | -1.2103116 |
| C | 2.5146113  | 0.4806747  | -0.9464655 |
| H | 0.7579522  | -1.0294706 | 1.5298409  |
| H | 2.1636265  | -1.5624104 | 0.1284227  |
| H | -0.9982118 | -0.4079538 | -2.2046172 |
| H | 0.6457707  | -0.4413748 | -2.8717276 |
| H | -0.3849107 | 1.2948455  | -0.6236186 |
| C | 0.1688460  | -2.7398655 | -1.1492958 |
| O | 0.5593712  | -3.5481784 | -0.3166731 |
| C | -0.6240288 | -3.1399398 | -2.3611024 |
| H | -0.7002176 | -4.2242329 | -2.3869862 |

|   |            |            |            |
|---|------------|------------|------------|
| H | -0.1514193 | -2.7826364 | -3.2789285 |
| H | -1.6284541 | -2.7096203 | -2.3208673 |
| O | 1.6390388  | -0.9642792 | -2.3821709 |
| N | -0.5428970 | -1.1545115 | 1.8559795  |
| C | -0.8876929 | -1.3824739 | 3.2458815  |
| H | -1.4007258 | -0.5109392 | 3.6634764  |
| H | -1.5540531 | -2.2461097 | 3.3158425  |
| H | 0.0152597  | -1.5725066 | 3.8185249  |
| C | -1.6790791 | -1.1317320 | 0.9593210  |
| H | -2.5365108 | -0.7479669 | 1.5141578  |
| H | -1.5248322 | -0.4705551 | 0.1134727  |
| H | -1.9294016 | -2.1328773 | 0.5953248  |
| F | 0.8054030  | 1.8900983  | -2.1083520 |

**Ac-(4R)Flp-NMe<sub>2</sub>(2R-NMe<sub>2</sub>)Ψ = 160.0° exo cis**

|   |            |            |            |
|---|------------|------------|------------|
| H | -0.3981827 | 2.5182788  | -0.1027714 |
| C | -0.2632421 | 1.6406133  | 0.5279253  |
| C | -1.5710860 | 1.1428551  | 1.0994911  |
| C | -1.2936709 | -0.3042187 | 1.4208952  |
| N | -0.3793854 | -0.7008665 | 0.3660783  |
| C | 0.3042141  | 0.4284211  | -0.2342292 |
| H | 0.3990797  | 1.9083559  | 1.3548578  |
| H | -1.9299674 | 1.7210406  | 1.9516058  |
| H | -0.8318212 | -0.3948264 | 2.4101705  |
| H | -2.1941601 | -0.9167835 | 1.4021336  |
| C | -0.2615497 | -1.9938467 | -0.0055321 |
| H | 0.0493091  | 0.4841020  | -1.2941988 |
| C | 1.8213528  | 0.3564551  | -0.0336014 |
| O | -0.8779100 | -2.8775141 | 0.5794240  |
| C | 0.6532922  | -2.2973399 | -1.1595151 |
| H | 0.5350046  | -1.5906160 | -1.9833230 |
| H | 0.4393879  | -3.3042542 | -1.5107593 |
| H | 1.6908524  | -2.2520168 | -0.8208547 |
| O | 2.2775988  | -0.3238545 | 0.8747550  |
| N | 2.5974358  | 1.0838318  | -0.8630799 |
| C | 4.0327329  | 1.0774517  | -0.6782626 |
| H | 4.3749674  | 2.0429072  | -0.2922119 |
| H | 4.3037691  | 0.2950553  | 0.0249166  |
| H | 4.5232422  | 0.8948800  | -1.6378107 |
| C | 2.1290352  | 2.0015239  | -1.8767202 |
| H | 2.5742348  | 1.7482280  | -2.8429639 |
| H | 1.0493089  | 1.9797877  | -1.9827765 |
| H | 2.4246654  | 3.0242858  | -1.6222377 |
| F | -2.5541796 | 1.2108805  | 0.1081022  |

**Ac-(4R)Flp-OMe(2R-OMe)Ψ = 143.0° exo trans**

|   |            |            |            |
|---|------------|------------|------------|
| H | -0.3375513 | 2.5605971  | 0.2734162  |
| C | -0.2864214 | 1.6000395  | 0.7829650  |
| C | -1.6555151 | 1.0528646  | 1.1203069  |
| C | -1.4181580 | -0.4299012 | 1.2951317  |
| N | -0.3497062 | -0.7011822 | 0.3494117  |
| C | 0.3461762  | 0.4974445  | -0.0760902 |
| H | 0.2762506  | 1.7219191  | 1.7117630  |
| H | -2.1222083 | 1.5233060  | 1.9863317  |
| H | -1.1126269 | -0.6429552 | 2.3254111  |
| H | -2.3199568 | -0.9998141 | 1.0707681  |
| C | -0.0020355 | -1.8991292 | -0.1643219 |
| H | 4.3653275  | 1.4758927  | -1.4688910 |
| H | 0.1904972  | 0.6728494  | -1.1427166 |
| C | 1.8354616  | 0.3949980  | 0.1898112  |
| H | 4.2245686  | 1.5003077  | 0.3154031  |
| O | 0.9069320  | -1.9846730 | -0.9823622 |
| C | -0.7801354 | -3.0917733 | 0.3137615  |
| H | -0.7950629 | -3.1431831 | 1.4046489  |
| H | -0.3211948 | -3.9915610 | -0.0888860 |
| H | -1.8161320 | -3.0336034 | -0.0304066 |
| O | 2.3123701  | -0.0849159 | 1.1854994  |
| O | 2.5381284  | 0.9682435  | -0.7785286 |
| C | 3.9569217  | 0.9687114  | -0.5985122 |
| H | 4.3283244  | -0.0550457 | -0.5436970 |
| F | -2.5076249 | 1.2485710  | 0.0315574  |

**Ac-(4R)Flp-OMe(2R-OMe)Ψ = -31.8° exo cis**

|   |            |            |           |
|---|------------|------------|-----------|
| H | -0.1411823 | 2.5097686  | 0.2576783 |
| C | -0.1553382 | 1.5485281  | 0.7677984 |
| C | -1.5551508 | 1.0729076  | 1.0828184 |
| C | -1.3984422 | -0.4182901 | 1.2519560 |

|   |            |            |            |
|---|------------|------------|------------|
| N | -0.3442358 | -0.7469415 | 0.3058596  |
| C | 0.4301152  | 0.4135442  | -0.0925978 |
| H | 0.3990921  | 1.6407334  | 1.7047699  |
| H | -2.0057191 | 1.5664347  | 1.9444419  |
| H | -1.1072556 | -0.6605103 | 2.2793884  |
| H | -2.3121826 | -0.9623465 | 1.0156349  |
| C | -0.2229769 | -1.9966272 | -0.1971668 |
| H | 3.6656388  | -1.1364776 | 2.4233093  |
| H | 0.3002946  | 0.6346142  | -1.1547502 |
| C | 1.9226831  | 0.3199863  | 0.1503266  |
| H | 4.1697493  | -0.9338387 | 0.7183528  |
| O | -0.9417110 | -2.9062455 | 0.1970236  |
| C | 0.8356970  | -2.2138196 | -1.2427677 |
| H | 0.8609525  | -1.4153298 | -1.9864155 |
| H | 0.6417296  | -3.1643767 | -1.7342955 |
| H | 1.8195059  | -2.2650619 | -0.7687353 |
| O | 2.7330547  | 0.8968786  | -0.5290744 |
| C | 2.2209402  | -0.4108259 | 1.2159351  |
| O | 3.6109794  | -0.4966749 | 1.5465077  |
| H | 4.0090817  | 0.4939542  | 1.7678608  |
| F | -2.3770074 | 1.3230585  | -0.0180990 |

**Ac-(4S)Azp-OMe (3S-OMe) and Ac-(4S)Azp-NMe<sub>2</sub> (3S-NMe<sub>2</sub>)**

**Ac-(4S)Azp-OMe(3S-OMe) endo trans  $\Psi$  = -177.4° C<sup>δ</sup>-C<sup>γ</sup>-N-N torsion = -172.6°**

|   |            |            |            |
|---|------------|------------|------------|
| H | 1.9256267  | 1.2394665  | 0.4794059  |
| C | 1.6171420  | 0.5383563  | -0.2954669 |
| C | 1.3144760  | -0.8608257 | 0.2399512  |
| N | 0.4236371  | -1.4028169 | -0.7555553 |
| C | -0.1505460 | -0.3773997 | -1.6168612 |
| C | 0.3223417  | 0.9305824  | -1.0000375 |
| H | 2.4189066  | 0.4770567  | -1.0337059 |
| C | 0.6743415  | -0.8545222 | 1.6226577  |
| H | 2.2179653  | -1.4696433 | 0.3209610  |
| H | 0.1064221  | 0.3528277  | 3.9019957  |
| H | -1.2399928 | -0.4273179 | -1.6438652 |
| H | 0.2295442  | -0.4680408 | -2.6387033 |
| H | 0.4742773  | 1.7011618  | -1.7595855 |
| C | 0.2476978  | -2.7374152 | -0.8807081 |
| O | 0.8356794  | -3.5263955 | -0.1524567 |
| C | -0.6997542 | -3.1815541 | -1.9592585 |
| H | -0.7136176 | -4.2684127 | -1.9870103 |
| H | -0.3965298 | -2.7952033 | -2.9354267 |
| H | -1.7078960 | -2.8114135 | -1.7566184 |
| O | -0.4087180 | -1.2943396 | 1.8952804  |
| O | 1.5017460  | -0.2969342 | 2.5054826  |
| C | 1.0246252  | -0.2337951 | 3.8525028  |
| H | 1.8143213  | 0.2472177  | 4.4240373  |
| H | 0.8325208  | -1.2371311 | 4.2336842  |
| N | -0.7164507 | 1.3835542  | -0.0516072 |
| N | -0.4275366 | 2.3491456  | 0.6327206  |
| N | -0.2573077 | 3.2293168  | 1.3146195  |

**Ac-(4S)Azp-OMe(3S-OMe) endo trans  $\Psi$  =11.0° C<sup>δ</sup>-C<sup>γ</sup>-N-N torsion = 176.5°**

|   |            |            |            |
|---|------------|------------|------------|
| H | 1.8708461  | 1.1783131  | 0.5019656  |
| C | 1.5782557  | 0.4809549  | -0.2823864 |
| C | 1.2318038  | -0.9034249 | 0.2578332  |
| N | 0.3869359  | -1.4519673 | -0.7783978 |
| C | -0.1456244 | -0.4231043 | -1.6632498 |
| C | 0.3052202  | 0.8802611  | -1.0216643 |
| H | 2.3992200  | 0.4015345  | -0.9974023 |
| C | 0.5813909  | -0.8126657 | 1.6321598  |
| H | 2.1176707  | -1.5279201 | 0.3944272  |
| H | -0.5664877 | -1.8578771 | 3.7586810  |
| H | -1.2330453 | -0.4696141 | -1.7395633 |
| H | 0.2800708  | -0.5119688 | -2.6669553 |
| H | 0.4720847  | 1.6610749  | -1.7672816 |
| C | 0.2509243  | -2.7865453 | -0.9439520 |
| O | 0.8070080  | -3.5814950 | -0.1971678 |
| C | -0.6178568 | -3.2252085 | -2.0894147 |
| H | -0.6220146 | -4.3117955 | -2.1287507 |
| H | -0.2486652 | -2.8281578 | -3.0382668 |
| H | -1.6402958 | -2.8627831 | -1.9567109 |
| O | 1.1011342  | -0.2181894 | 2.5449261  |

|   |            |            |            |
|---|------------|------------|------------|
| O | -0.5689372 | -1.4566052 | 1.7201638  |
| C | -1.2084842 | -1.4134723 | 2.9975415  |
| H | -2.1245363 | -1.9881687 | -2.8880023 |
| H | -1.4342599 | -0.3823793 | 3.2725288  |
| N | -0.7586777 | 1.3098641  | -0.0888045 |
| N | -0.5175037 | 2.3145115  | 0.5595881  |
| N | -0.3928158 | 3.2286803  | 1.2040040  |

**Ac-(4S)Azp-OMe(3S-OMe) endo trans  $\Psi$  =178.0° C<sup>δ</sup>-C<sup>γ</sup>-N-N torsion = -51.9°**

|   |            |            |            |
|---|------------|------------|------------|
| H | 1.9112327  | 1.2758249  | 0.4380422  |
| C | 1.6336432  | 0.5585447  | -0.3317820 |
| C | 1.3147441  | -0.8316803 | 0.2214561  |
| N | 0.4379628  | -1.3858618 | -0.7804613 |
| C | -0.1098359 | -0.3741605 | -1.6700436 |
| C | 0.3573632  | 0.9462635  | -1.0611176 |
| H | 2.4507987  | 0.4788991  | -1.0502969 |
| C | 0.6444716  | -0.8002633 | 1.5893728  |
| H | 2.2136685  | -1.4425299 | 0.3281405  |
| H | 0.1183256  | 0.4191443  | 3.8702429  |
| H | -1.1984833 | -0.4386898 | -1.7415701 |
| H | 0.2961748  | -0.4754618 | -2.6815620 |
| H | 0.5263694  | 1.7036964  | -1.8303100 |
| C | 0.2263035  | -2.7187497 | -0.8619828 |
| O | 0.7795889  | -3.4959841 | -0.0952455 |
| C | -0.7158966 | -3.1758631 | -1.9397618 |
| H | -0.7402430 | -4.2628788 | -1.9452263 |
| H | -0.4038656 | -2.8117299 | -2.9215046 |
| H | -1.7225993 | -2.7942078 | -1.7503125 |
| O | -0.4754539 | -1.1615669 | 1.8278953  |
| O | 1.4911225  | -0.3260281 | 2.5004969  |
| C | 0.9847382  | -0.2423830 | 3.8351635  |
| H | 1.7964206  | 0.1610069  | 4.4354330  |
| H | 0.6987491  | -1.2314629 | 4.1943744  |
| N | -0.5705227 | 1.4904426  | -0.0491571 |
| N | -1.7370134 | 1.5955056  | -0.3798488 |
| N | -2.8363046 | 1.7263941  | -0.5873105 |

**Ac-(4S)Azp-OMe(3S-OMe) endo trans  $\Psi$  =-0.1° C<sup>δ</sup>-C<sup>γ</sup>-N-N torsion = -52.3°**

|   |            |            |            |
|---|------------|------------|------------|
| H | 1.9360647  | 1.1825675  | 0.5571918  |
| C | 1.6706148  | 0.5059225  | -0.2528968 |
| C | 1.2826864  | -0.8891318 | 0.2394426  |
| N | 0.4347968  | -1.3825713 | -0.8217692 |
| C | -0.0206370 | -0.3258375 | -1.7116145 |
| C | 0.4393040  | 0.9557077  | -1.0220056 |
| H | 2.5152544  | 0.4252784  | -0.9386635 |
| C | 0.6243952  | -0.8374384 | 1.6110424  |
| H | 2.1551843  | -1.5337905 | 0.3628057  |
| H | -0.7627325 | -1.8509445 | 3.6045239  |
| H | -1.1026576 | -0.3558214 | -1.8625062 |
| H | 0.4542484  | -0.4030451 | -2.6949300 |
| H | 0.6560387  | 1.7463676  | -1.7440808 |
| C | 0.1945232  | -2.7046848 | -0.9682655 |
| O | 0.6691157  | -3.5242477 | -0.1927172 |
| C | -0.6835433 | -3.0959906 | -2.1234692 |
| H | -0.7373973 | -4.1809741 | -2.1698646 |
| H | -0.2945161 | -2.7081943 | -3.0679061 |
| H | -1.6903152 | -2.6911667 | -1.9904154 |
| O | 1.2218769  | -0.4539226 | 2.5860089  |
| O | -0.6307745 | -1.2536469 | 1.6192707  |
| C | -1.2873017 | -1.2182677 | 2.8879092  |
| H | -2.2916347 | -1.5946821 | 2.7110075  |
| H | -1.3225613 | -0.1958066 | 3.2661940  |
| N | -0.5294348 | 1.4636568  | -0.0282068 |
| N | -1.6761636 | 1.6081141  | -0.4092662 |
| N | -2.7620722 | 1.7692482  | -0.6616565 |

**Ac-(4S)Azp-OMe(3S-OMe) endo cis  $\Psi$  =15.1° C<sup>δ</sup>-C<sup>γ</sup>-N-N torsion = 176.7°**

|   |            |            |            |
|---|------------|------------|------------|
| H | 2.0823540  | 1.1445957  | 0.5614323  |
| C | 1.7409382  | 0.4665968  | -0.2199879 |
| C | 1.3065615  | -0.8919205 | 0.3264691  |
| N | 0.4565962  | -1.3966513 | -0.7274126 |
| C | -0.0428159 | -0.3328295 | -1.5907475 |
| C | 0.4902622  | 0.9400350  | -0.9536007 |

|   |            |            |            |
|---|------------|------------|------------|
| H | 2.5502929  | 0.3280485  | -0.9391070 |
| C | 0.6321608  | -0.7353172 | 1.6871501  |
| H | 2.1691969  | -1.5408338 | 0.4944640  |
| H | -0.5802398 | -1.6694296 | 3.8344098  |
| H | -1.1320644 | -0.3394427 | -1.6418508 |
| H | 0.3466608  | -0.4585382 | -2.6041023 |
| H | 0.7007072  | 1.7111073  | -1.6978964 |
| C | 0.1930586  | -2.6901446 | -1.0125822 |
| O | -0.5107315 | -2.9848355 | -1.9711966 |
| C | 0.8129970  | -3.7309874 | -0.1214609 |
| H | 0.4462581  | -4.7079321 | -0.4272726 |
| H | 0.5622650  | -3.5585166 | 0.9262950  |
| H | 1.9022182  | -3.7156733 | -0.2150225 |
| O | 1.1409036  | -0.1156098 | 2.5877498  |
| O | -0.5230437 | -1.3732269 | 1.7773238  |
| C | -1.1990199 | -1.2639811 | 3.0334407  |
| H | -2.1139920 | -1.8405078 | 2.9260271  |
| H | -1.4276801 | -0.2192161 | 3.2462009  |
| N | -0.5369720 | 1.4336126  | -0.0096114 |
| N | -0.2306586 | 2.4238846  | 0.6333289  |
| N | -0.0453172 | 3.3299769  | 1.2746024  |

**Ac-(4S)Azp-OMe(3S-OMe) endo cis  $\Psi = 5.3^\circ$  C $^\delta$ -C $^\gamma$ -N-N torsion = -56.4 $^\circ$**

|   |            |            |            |
|---|------------|------------|------------|
| H | 2.0268720  | 1.1727749  | 0.5739342  |
| C | 1.7251211  | 0.4913816  | -0.2190991 |
| C | 1.3265810  | -0.8902375 | 0.3057066  |
| N | 0.4757488  | -1.3939675 | -0.7480920 |
| C | -0.0217814 | -0.3362800 | -1.6157308 |
| C | 0.4769837  | 0.9454990  | -0.9571773 |
| H | 2.5459256  | 0.3821869  | -0.9292035 |
| C | 0.6744326  | -0.7828375 | 1.6805158  |
| H | 2.2086263  | -1.5186317 | 0.4472654  |
| H | -0.6527473 | -1.7288489 | 3.7526944  |
| H | -1.1092313 | -0.3809509 | -1.7082254 |
| H | 0.3948205  | -0.4410776 | -2.6215808 |
| H | 0.6827762  | 1.7269522  | -1.6921592 |
| C | 0.1861859  | -2.6871193 | -1.0102660 |
| O | -0.5267754 | -2.9851483 | -1.9608526 |
| C | 0.7884219  | -3.7219037 | -0.1006866 |
| H | 0.4178164  | -4.6998731 | -0.3982965 |
| H | 0.5249643  | -3.5353720 | 0.9418743  |
| H | 1.8787594  | -3.7150311 | -0.1786139 |
| O | 1.2570444  | -0.3143909 | 2.6257049  |
| O | -0.5527559 | -1.2763431 | 1.7258892  |
| C | -1.2134598 | -1.1858232 | 2.9913684  |
| H | -2.1928652 | -1.6335296 | 2.8445536  |
| H | -1.3098306 | -0.1412489 | 3.2893270  |
| N | -0.4555747 | 1.4718083  | 0.0623099  |
| N | -1.5936644 | 1.6950931  | -0.3095166 |
| N | -2.6674890 | 1.9320719  | -0.5513974 |

**Ac-(4S)Azp-OMe(3S-OMe) endo cis  $\Psi = -164.8^\circ$  C $^\delta$ -C $^\gamma$ -N-N torsion = 174.7 $^\circ$**

|   |            |            |            |
|---|------------|------------|------------|
| H | 2.1251199  | 1.1707251  | 0.5005348  |
| C | 1.7443979  | 0.4791671  | -0.2492924 |
| C | 1.3778411  | -0.8914384 | 0.3184259  |
| N | 0.4756840  | -1.4113098 | -0.6810256 |
| C | -0.1047638 | -0.3572495 | -1.5046223 |
| C | 0.4409242  | 0.9266276  | -0.9011963 |
| H | 2.5061485  | 0.3554624  | -1.0214857 |
| C | 0.7276171  | -0.8319758 | 1.6994846  |
| H | 2.2668312  | -1.5184303 | 0.4267029  |
| H | -0.0674816 | 0.4442640  | 3.8672388  |
| H | -1.1944805 | -0.3892886 | -1.4818390 |
| H | 0.2177845  | -0.4710121 | -2.5426385 |
| H | 0.5887202  | 1.7013565  | -1.6567160 |
| C | 0.2056588  | -2.7096247 | -0.9405885 |
| O | -0.5572604 | -3.0142824 | -1.8493082 |
| C | 0.8948029  | -3.7394845 | -0.0891604 |
| H | 0.5362244  | -4.7232565 | -0.3824951 |
| H | 0.6880285  | -3.5749945 | 0.9693168  |
| H | 1.9775010  | -3.6977506 | -0.2359439 |
| O | -0.2615291 | -1.4360202 | 2.0174820  |
| O | 1.4337485  | -0.0643884 | 2.5238552  |
| C | 0.9412657  | 0.0303604  | 3.8648162  |
| H | 1.6269718  | 0.6943732  | 4.3845523  |

|   |            |            |           |
|---|------------|------------|-----------|
| H | 0.9294063  | -0.9537168 | 4.3340914 |
| N | -0.5335722 | 1.4035593  | 0.1052562 |
| N | -0.1918715 | 2.3766322  | 0.7546812 |
| N | 0.0303674  | 3.2654236  | 1.4094802 |

**Ac-(4S)Azp-OMe(3S-OMe) endo cis  $\Psi = -173.1^\circ$  C $^\delta$ -C $^\gamma$ -N-N torsion = -56.0 $^\circ$**

|   |            |            |            |
|---|------------|------------|------------|
| H | 2.1349340  | 1.1539901  | 0.5362252  |
| C | 1.7858043  | 0.4751427  | -0.2386301 |
| C | 1.3970279  | -0.9053354 | 0.2964356  |
| N | 0.4944713  | -1.3934684 | -0.7183585 |
| C | -0.0385701 | -0.3241042 | -1.5498083 |
| C | 0.5083712  | 0.9481035  | -0.9112384 |
| H | 2.5684024  | 0.3585567  | -0.9897559 |
| C | 0.7422676  | -0.8585509 | 1.6747493  |
| H | 2.2789260  | -1.5435160 | 0.3952586  |
| H | 0.1258306  | 0.3926771  | 3.9145639  |
| H | -1.1298016 | -0.3576131 | -1.5824212 |
| H | 0.3209174  | -0.4249979 | -2.5779050 |
| H | 0.6872709  | 1.7302025  | -1.6527076 |
| C | 0.1647682  | -2.6806183 | -0.9655209 |
| O | -0.6023028 | -2.9600622 | -1.8788017 |
| C | 0.7929909  | -3.7304033 | -0.0920045 |
| H | 0.4119560  | -4.7027977 | -0.3946987 |
| H | 0.5552309  | -3.5567916 | 0.9587805  |
| H | 1.8807706  | -3.7238818 | -0.2002139 |
| O | -0.3280760 | -1.3325639 | 1.9474178  |
| O | 1.5466459  | -0.2678108 | 2.5516472  |
| C | 1.0520008  | -0.1824076 | 3.8916016  |
| H | 1.8281218  | 0.3217415  | 4.4616844  |
| H | 0.8688109  | -1.1797690 | 4.2925615  |
| N | -0.3611948 | 1.4824731  | 0.1578732  |
| N | -1.5160899 | 1.7167665  | -0.1507285 |
| N | -2.5984643 | 1.9656085  | -0.3344406 |

**Ac-(4S)Azp-NMe<sub>2</sub>(3S-NMe<sub>2</sub>) endo trans  $\Psi = 171.3^\circ$ , C $^\delta$ -C $^\gamma$ -N-N torsion = 149.1 $^\circ$**

|   |            |            |            |
|---|------------|------------|------------|
| H | 1.8778106  | 1.1838455  | 0.4437236  |
| C | 1.5756015  | 0.5114333  | -0.3596659 |
| C | 1.3669717  | -0.9371342 | 0.0921219  |
| N | 0.4362322  | -1.4420698 | -0.8878304 |
| C | -0.2070066 | -0.3957291 | -1.6676197 |
| C | 0.2473035  | 0.8962168  | -1.0019710 |
| H | 2.3530908  | 0.5472358  | -1.1252072 |
| C | 0.7807032  | -1.0464344 | 1.5108415  |
| H | 2.2877510  | -1.5196937 | 0.0425624  |
| H | -1.2943448 | -0.4814007 | -1.6513105 |
| H | 0.1307256  | -0.4213221 | -2.7084568 |
| H | 0.3644161  | 1.6987177  | -1.7339035 |
| C | 0.2451232  | -2.7700576 | -1.0305738 |
| O | 0.8733776  | -3.5777154 | -0.3560358 |
| C | -0.7687800 | -3.1900316 | -2.0574225 |
| H | -0.7634140 | -4.2748631 | -2.1316789 |
| H | -0.5500964 | -2.7548243 | -3.0354312 |
| H | -1.7659268 | -2.8535999 | -1.7617948 |
| O | -0.3936863 | -1.3371530 | 1.6726976  |
| N | 1.6166343  | -0.7768703 | 2.5381081  |
| C | 1.1043613  | -0.7657847 | 3.8904125  |
| H | 1.6584530  | -1.4783779 | 4.5079604  |
| H | 1.2148759  | 0.2318348  | 4.3266605  |
| H | 0.0529390  | -1.0385611 | 3.8782895  |
| C | 3.0083930  | -0.4110522 | 2.4184309  |
| H | 3.6043141  | -1.0186594 | 3.1048663  |
| H | 3.3895846  | -0.5731255 | 1.4148372  |
| H | 3.1573635  | 0.6421349  | 2.6812172  |
| N | -0.7968249 | 1.3107194  | -0.0418882 |
| N | -0.4377851 | 1.9151881  | 0.9480352  |
| N | -0.2053062 | 2.4677175  | 1.9032640  |

**Ac-(4S)Azp-NMe<sub>2</sub>(3S-NMe<sub>2</sub>) endo trans  $\Psi = 170.6^\circ$ , C $^\delta$ -C $^\gamma$ -N-N torsion = -20.2 $^\circ$**

|   |            |            |            |
|---|------------|------------|------------|
| H | 2.1856185  | 0.9239551  | 0.3891760  |
| C | 1.8104878  | 0.2995127  | -0.4200061 |
| C | 1.4034074  | -1.1094201 | 0.0208611  |
| N | 0.4363601  | -1.4819129 | -0.9836489 |
| C | -0.0947013 | -0.3421090 | -1.7116436 |
| C | 0.5312063  | 0.8667641  | -1.0241196 |

|   |            |             |            |
|---|------------|-------------|------------|
| H | 2.5782868  | 0.2301095   | -1.1934233 |
| C | 0.7575013  | -1.1476815  | 1.4178998  |
| H | 2.2366426  | -1.8118241  | -0.0097682 |
| H | -1.1871454 | -0.3203043  | -1.6969358 |
| H | 0.2188183  | -0.3634069  | -2.7599423 |
| H | 0.7375845  | 1.6650501   | -1.7396183 |
| C | 0.0668759  | -2.7701186  | -1.1434771 |
| O | 0.5829477  | -3.6647994  | -0.4844548 |
| C | -0.9996775 | -3.0341562  | -2.1688533 |
| H | -1.1217495 | -4.1090391  | -2.2788022 |
| H | -0.7464946 | -2.5925199  | -3.1353732 |
| H | -1.9476404 | -2.5972457  | -1.8432733 |
| O | -0.4513685 | -1.2820579  | 1.5306252  |
| N | 1.5824215  | -0.10138589 | 2.4786155  |
| C | 1.0287572  | -0.9728742  | 3.8134425  |
| H | 1.4300818  | -1.7943957  | 4.4142881  |
| H | 1.2905526  | -0.0281928  | 4.2999375  |
| H | -0.0524348 | -1.0622342  | 3.7562468  |
| C | 3.0161189  | -0.8559874  | 2.4152502  |
| H | 3.4943066  | -1.5844930  | 3.0762757  |
| H | 3.4009277  | -1.0125243  | 1.4123461  |
| H | 3.3093164  | 0.1464019   | 2.7454766  |
| N | -0.2630946 | 1.4615278   | 0.0714802  |
| N | -1.4543217 | 1.2306592   | 0.1145298  |
| N | -2.5619814 | 1.0751951   | 0.2475710  |

**Ac-(4S)Azp-NMe<sub>2</sub>(3S-NMe<sub>2</sub>) endo trans**

**Ψ = -3.1°, C<sup>δ</sup>-C<sup>γ</sup>-N-N torsion = 170.7°**

|   |            |            |            |
|---|------------|------------|------------|
| H | 1.7139130  | 1.0779347  | 0.5061077  |
| C | 1.4952486  | 0.4311343  | -0.3427345 |
| C | 1.1623724  | -1.0013329 | 0.0808455  |
| N | 0.3577908  | -1.4801203 | -1.0268004 |
| C | -0.0830313 | -0.4087460 | -1.9118148 |
| C | 0.2813802  | 0.8579479  | -1.1569227 |
| H | 2.3696418  | 0.4277450  | -0.9967607 |
| C | 0.6428265  | -1.0465639 | -1.5266697 |
| H | 2.0676755  | -1.6082931 | 0.1454557  |
| H | -1.1549261 | -0.4574994 | -2.1146092 |
| H | 0.4515882  | -0.4422816 | -2.8655118 |
| H | 0.4955940  | 1.6851601  | -1.8378364 |
| C | 0.2609441  | -2.8010777 | -1.2948293 |
| O | 0.7384066  | -3.6379452 | -0.5382765 |
| C | -0.4828358 | -3.1743597 | -2.5459153 |
| H | -0.4725050 | -4.2566349 | -2.6492941 |
| H | -0.0260631 | -2.7190403 | -3.4279641 |
| H | -1.5177993 | -2.8253715 | -2.4961974 |
| O | 1.4743573  | -0.6932909 | 2.3607094  |
| N | -0.5873127 | -1.4622266 | 1.8770399  |
| C | -0.8865477 | -1.6089514 | 3.2888633  |
| H | -1.6147624 | -0.8565221 | 3.6063183  |
| H | -1.3095586 | -2.6005465 | 3.4683423  |
| H | 0.0233618  | -1.4910307 | 3.8695904  |
| C | -1.6833604 | -1.8060018 | 0.9910934  |
| H | -2.6089924 | -1.7105858 | 1.5590965  |
| H | -1.7488510 | -1.1223031 | 0.1507102  |
| H | -1.6066588 | -2.8365718 | 0.6348092  |
| N | -0.8740498 | 1.2157033  | -0.3070000 |
| N | -0.6876974 | 2.1097693  | 0.5006279  |
| N | -0.6192579 | 2.9198489  | 1.2790241  |

**Ac-(4S)Azp-NMe<sub>2</sub>(3S-NMe<sub>2</sub>) endo trans**

**Ψ = -4.7°, C<sup>δ</sup>-C<sup>γ</sup>-N-N torsion = -67.6°**

|   |            |            |            |
|---|------------|------------|------------|
| H | 1.7107313  | 1.0773296  | 0.5663732  |
| C | 1.5189387  | 0.4435453  | -0.2966584 |
| C | 1.1742905  | -0.9965484 | 0.0938445  |
| N | 0.3588321  | -1.4452653 | -1.0194794 |
| C | -0.0525478 | -0.3579819 | -1.8952814 |
| C | 0.3267709  | 0.8991155  | -1.1177658 |
| H | 2.4045615  | 0.4449869  | -0.9342374 |
| C | 0.6665469  | -1.0885033 | 1.5409969  |
| H | 2.0759416  | -1.6111303 | 0.1363075  |
| H | -1.1210282 | -0.3976378 | -2.1257516 |
| H | 0.4933729  | -0.3846677 | -2.8437428 |
| H | 0.5660302  | 1.7289753  | -1.7867169 |
| C | 0.2200294  | -2.7621847 | -1.2929310 |
| O | 0.6766964  | -3.6154817 | -0.5428744 |
| C | -0.5422082 | -3.1071034 | -2.5412301 |

|   |            |            |            |
|---|------------|------------|------------|
| H | -0.5581413 | -4.1883869 | -2.6538018 |
| H | -0.0828053 | -2.6546879 | -3.4233519 |
| H | -1.5687578 | -2.7355158 | -2.4793906 |
| O | 1.5157454  | -0.8015248 | 2.3821268  |
| N | -0.5692599 | -1.4902183 | 1.8870553  |
| C | -0.8516639 | -1.7079913 | 3.2925230  |
| H | -1.4910775 | -0.9117123 | 3.6863209  |
| H | -1.3707306 | -2.6622153 | 3.4101883  |
| H | 0.0774962  | -1.7270438 | 3.8545350  |
| C | -1.6969616 | -1.7267948 | 1.0098855  |
| H | -2.6084422 | -1.5165861 | 1.5711185  |
| H | -1.6843668 | -1.0632567 | 0.1529891  |
| H | -1.7339553 | -2.7664368 | 0.6719889  |
| N | -0.7337675 | 1.3180606  | -0.1775742 |
| N | -1.7662328 | 1.7186480  | -0.6857364 |
| N | -2.7589024 | 2.1007567  | -1.0558673 |

**Ac-(4S)Azp-NMe<sub>2</sub>(3S-NMe<sub>2</sub>) endo cis**

**Ψ = 178.5°, C<sup>δ</sup>-C<sup>γ</sup>-N-N torsion = 161.4°**

|   |            |            |            |
|---|------------|------------|------------|
| H | 2.0490620  | 1.1739449  | 0.4803385  |
| C | 1.7025348  | 0.5060478  | -0.3078089 |
| C | 1.4528743  | -0.9332759 | 0.1583661  |
| N | 0.5207498  | -1.4142594 | -0.8332383 |
| C | -0.1442103 | -0.3438890 | -1.5624591 |
| C | 0.3671028  | 0.9289367  | -0.9081936 |
| H | 2.4577951  | 0.5048781  | -1.0962305 |
| C | 0.8621792  | -1.0211501 | 1.5803834  |
| H | 2.3750615  | -1.5169252 | 0.1241427  |
| H | -1.2287738 | -0.4318883 | -1.4908582 |
| H | 0.1309948  | -0.3798582 | -2.6198477 |
| H | 0.4810912  | 1.7374323  | -1.6340659 |
| C | 0.2219562  | -2.7038592 | -1.0957268 |
| O | -0.5968378 | -2.9907820 | -1.9617348 |
| C | 0.9491014  | -3.7521105 | -0.2997640 |
| H | 0.6055801  | -4.7313165 | -0.6247194 |
| H | 0.7500581  | -3.6321964 | 0.7667747  |
| H | 2.0289161  | -3.6825968 | -0.4550511 |
| O | -0.2771746 | -1.4264844 | 1.7480709  |
| N | 1.6553153  | -0.6266809 | 2.6001450  |
| C | 1.1224087  | -0.5930635 | 3.9449889  |
| H | 1.5955912  | -1.3601694 | 4.5657159  |
| H | 1.3183237  | 0.3852543  | 4.3920251  |
| H | 0.0508957  | -0.7695932 | 3.9129323  |
| C | 3.0461807  | -0.2503051 | 2.4925166  |
| H | 3.4580474  | -0.4789244 | 1.5139553  |
| H | 3.1785828  | 0.8193048  | 2.6866328  |
| H | 3.6271829  | -0.8034350 | 3.2355504  |
| N | -0.6170389 | 1.3519976  | 0.1112963  |
| N | -0.2226954 | 2.1304198  | 0.9573933  |
| N | 0.0493300  | 2.8385226  | 1.7919116  |

**Ac-(4S)Azp-NMe<sub>2</sub>(3S-NMe<sub>2</sub>) endo cis**

**Ψ = 174.3°, C<sup>δ</sup>-C<sup>γ</sup>-N-N torsion = -25.1°**

|   |            |            |            |
|---|------------|------------|------------|
| H | 2.2205864  | 0.9478133  | 0.4370678  |
| C | 1.8441727  | 0.3319065  | -0.3774493 |
| C | 1.4587989  | -1.0919192 | 0.0443674  |
| N | 0.5078445  | -1.4618254 | -0.9777043 |
| C | -0.0515127 | -0.3139158 | -1.6724347 |
| C | 0.5501661  | 0.8869103  | -0.9563803 |
| H | 2.6032133  | 0.2825077  | -1.1607152 |
| C | 0.8208820  | -1.1585111 | 1.4466050  |
| H | 2.3232278  | -1.7574185 | 0.0125753  |
| H | -1.1433209 | -0.3410712 | -1.6543138 |
| H | 0.2503132  | -0.3167421 | -2.7235475 |
| H | 0.7324637  | 1.7140323  | -1.6453442 |
| C | 0.0733169  | -2.7080003 | -1.2611390 |
| O | -0.7653676 | -2.8926947 | -2.1357237 |
| C | 0.6767930  | -3.8383717 | -0.4748810 |
| H | 0.2488664  | -4.7728021 | -0.8300549 |
| H | 0.4612538  | -3.7216667 | 0.5890501  |
| H | 1.7619263  | -3.8698330 | -0.6009344 |
| O | -0.3705590 | -1.4026167 | 1.5644073  |
| N | 1.6348296  | -0.9504980 | 2.5030750  |
| C | 1.0772353  | -0.9154369 | 3.8373014  |
| H | 1.5262591  | -1.6981115 | 4.4557777  |
| H | 1.2816105  | 0.0536256  | 4.3023091  |
| H | 0.0034125  | -1.0701738 | 3.7819572  |

|   |            |            |           |
|---|------------|------------|-----------|
| C | 3.0551023  | -0.6963803 | 2.4352645 |
| H | 3.5705329  | -1.3377428 | 3.1552290 |
| H | 3.4626517  | -0.9077602 | 1.4511617 |
| H | 3.2789936  | 0.3455719  | 2.6878384 |
| N | -0.2436834 | 1.4173291  | 0.1727951 |
| N | -1.4429622 | 1.2220383  | 0.1756392 |
| N | -2.5567531 | 1.0919995  | 0.2795875 |

**Ac-(4S)Azp-NMe<sub>2</sub>(3S-NMe<sub>2</sub>) endo cis**

**Ψ = -1.9°, C<sup>δ</sup>-C<sup>γ</sup>-N-N torsion = 174.5°**

|   |            |            |            |
|---|------------|------------|------------|
| H | 1.6617580  | 1.1897727  | 0.5622272  |
| C | 1.5172784  | 0.5230296  | -0.2872309 |
| C | 1.2483708  | -0.9224109 | 0.1400736  |
| N | 0.5380366  | -1.4604163 | -1.0014228 |
| C | 0.0402025  | -0.4263840 | -1.9000177 |
| C | 0.3189829  | 0.8709860  | -1.1609386 |
| H | 2.4193115  | 0.5577502  | -0.9014299 |
| C | 0.6441998  | -0.9918844 | 1.5534629  |
| H | 2.1982517  | -1.4448650 | 0.2725024  |
| H | -1.0214477 | -0.5593728 | -2.1159258 |
| H | 0.5804565  | -0.4619420 | -2.8494217 |
| H | 0.5259026  | 1.6921683  | -1.8510256 |
| C | 0.4688041  | -2.7615062 | -1.3572099 |
| O | -0.0868225 | -3.0970615 | -2.3963480 |
| C | 1.1036991  | -3.7574246 | -0.4261947 |
| H | 0.8252557  | -4.7582449 | -0.7474960 |
| H | 0.7961731  | -3.6050983 | 0.6103428  |
| H | 2.1926121  | -3.6632999 | -0.4629535 |
| O | 1.3995926  | -0.6018924 | 2.4401439  |
| N | -0.5689081 | -1.5078813 | 1.8263294  |
| C | -0.9261274 | -1.6994265 | 3.2198451  |
| H | -1.5833182 | -0.8963179 | 3.5676515  |
| H | -1.4530067 | -2.6501850 | 3.3224714  |
| H | -0.0291243 | -1.7099280 | 3.8326218  |
| C | -1.6338348 | -1.8096372 | 0.8868244  |
| H | -2.5833430 | -1.6485583 | 1.3990363  |
| H | -1.6156522 | -1.1476866 | 0.0294024  |
| H | -1.6029103 | -2.8508874 | 0.5530356  |
| N | -0.8789858 | 1.2016555  | -0.3591348 |
| N | -0.7757593 | 2.1665542  | 0.3786426  |
| N | -0.7823280 | 3.0382116  | 1.0910030  |

**Ac-(4S)Azp-NMe<sub>2</sub>(3S-NMe<sub>2</sub>) endo cis**

**Ψ = -3.5°, C<sup>δ</sup>-C<sup>γ</sup>-N-N torsion = -66.5°**

|   |            |            |            |
|---|------------|------------|------------|
| H | 1.6687143  | 1.1923381  | 0.6272728  |
| C | 1.5404346  | 0.5465213  | -0.2387179 |
| C | 1.2595460  | -0.9095814 | 0.1476681  |
| N | 0.5378487  | -1.4087475 | -1.0057876 |
| C | 0.0657015  | -0.3476453 | -1.8837472 |
| C | 0.3552072  | 0.9313180  | -1.1049849 |
| H | 2.4468426  | 0.5881008  | -0.8447311 |
| C | 0.6681414  | -1.0198126 | 1.5639268  |
| H | 2.2053635  | -1.4447175 | 0.2570622  |
| H | -0.9923665 | -0.4736556 | -2.1289054 |
| H | 0.6176709  | -0.3619785 | -2.8278990 |
| H | 0.5766914  | 1.7683913  | -1.7708732 |
| C | 0.4258358  | -2.7017834 | -1.3824495 |
| O | -0.1438210 | -3.0009548 | -2.4249982 |
| C | 1.0299532  | -3.7322367 | -0.4695916 |
| H | 0.7367327  | -4.7192125 | -0.8191601 |
| H | 0.7093016  | -3.5985472 | 0.5655324  |
| H | 2.1207294  | -3.6577048 | -0.4877706 |
| O | 1.4468929  | -0.6958515 | 2.4566311  |
| N | -0.5565622 | -1.5083347 | 1.8351228  |
| C | -0.9004221 | -1.7382301 | 3.2256456  |
| H | -1.4765993 | -0.8996546 | 3.6294128  |
| H | -1.5076946 | -2.6430643 | 3.2921930  |
| H | 0.0038020  | -1.8594366 | 3.8157816  |
| C | -1.6538465 | -1.7245945 | 0.9136307  |
| H | -2.5751456 | -1.3943062 | 1.3977646  |
| H | -1.5391363 | -1.1508154 | 0.0042686  |
| H | -1.7630150 | -2.7840260 | 0.6616370  |
| N | -0.7523988 | 1.3073115  | -0.2005756 |
| N | -1.7943264 | 1.6341344  | -0.7415592 |
| N | -2.7985116 | 1.9491892  | -1.1419071 |

**Ac-(4R)Azp-OMe (3R-OMe) and Ac-(4R)Azp-NMe<sub>2</sub> (3R-NMe<sub>2</sub>)**

**Ac-(4R)Azp-NMe<sub>2</sub>(3R-NMe<sub>2</sub>) exo cis**

**Ψ = 159.8°, C<sup>δ</sup>-C<sup>γ</sup>-N-N torsion = 65.6°**

|   |            |            |            |
|---|------------|------------|------------|
| H | -0.3103196 | 2.6036384  | -0.0576197 |
| C | -0.2461592 | 1.7033017  | 0.5515776  |
| C | -1.6013457 | 1.2258625  | 1.0381750  |
| C | -1.3312301 | -0.2322420 | 1.3738743  |
| N | -0.3872149 | -0.6301310 | 0.3479457  |
| C | 0.3227559  | 0.4993356  | -0.2200639 |
| H | 0.3811712  | 1.9147012  | 1.4201920  |
| H | -1.9578391 | 1.7919839  | 1.9022205  |
| H | -0.8933178 | -0.3126962 | 2.3748712  |
| H | -2.2164413 | -0.8681749 | -1.3429929 |
| C | -0.2802022 | -1.9191913 | -0.0416040 |
| H | 4.4110532  | 2.0705987  | -0.1840997 |
| H | 0.0869757  | 0.5763869  | -1.2832771 |
| C | 1.8341494  | 0.4073476  | 0.0093531  |
| H | 4.3131703  | 0.3220360  | 0.1222313  |
| O | -0.9295384 | -2.8013280 | 0.5088594  |
| C | 0.6651806  | -2.2189906 | -1.1713316 |
| H | 0.5844511  | -1.4965160 | -1.9859740 |
| H | 0.4459346  | -3.2161017 | -1.5463930 |
| H | 1.6920933  | -2.1964215 | -0.7996698 |
| O | 2.2643113  | -0.2886681 | 0.9185875  |
| C | 4.0657220  | 1.1111598  | -0.5821066 |
| H | 4.5735740  | 0.9277818  | -1.5324492 |
| N | -2.5532569 | 1.3757275  | -0.0823670 |
| N | -3.6881113 | 0.9866184  | 0.1333704  |
| N | -4.7602730 | 0.6588306  | 0.2350034  |
| N | 2.6345915  | 1.1355640  | -0.7957404 |
| C | 2.1972782  | 2.0681792  | -1.8097846 |
| H | 2.6618499  | 1.8205819  | -2.7683398 |
| H | 1.1200709  | 2.0575725  | -1.9404329 |
| H | 2.4965889  | 3.0853856  | -1.5380245 |

**Ac-(4R)Azp-NMe<sub>2</sub>(3R-NMe<sub>2</sub>) exo cis**

**Ψ = 160.4°, C<sup>δ</sup>-C<sup>γ</sup>-N-N torsion = -178.2°**

|   |            |            |            |
|---|------------|------------|------------|
| H | -0.2452074 | 2.6365949  | 0.0040869  |
| C | -0.1947356 | 1.7234626  | 0.5981424  |
| C | -1.5496343 | 1.2562933  | 1.1154945  |
| C | -1.2963386 | -0.2049736 | 1.4192389  |
| N | -0.3843382 | -0.6027592 | 0.3630415  |
| C | 0.3387764  | 0.5204136  | -0.1989624 |
| H | 0.4539080  | 1.9186623  | 1.4556522  |
| H | -1.8746388 | 1.8128941  | 1.9977803  |
| H | -0.8335329 | -0.3111383 | 2.4057148  |
| H | -2.1994809 | -0.8120165 | 1.3913206  |
| C | -0.3005880 | -1.8888421 | -0.0419831 |
| H | 4.4407441  | 2.0369761  | -0.1661113 |
| H | 0.0917775  | 0.6165332  | -1.2581151 |
| C | 1.8518220  | 0.3994202  | 0.0070435  |
| H | 4.3313414  | 0.2808285  | 0.0874923  |
| O | -0.9457336 | -2.7699186 | 0.5146723  |
| C | 0.6138359  | -2.1871200 | -1.1975907 |
| H | 0.5262877  | -1.4524064 | -2.0004560 |
| H | 0.3699526  | -3.1753308 | -1.5809786 |
| H | 1.6491735  | -2.1865825 | -0.8493984 |
| O | 2.2835513  | -0.3248306 | 0.8929188  |
| C | 4.0848007  | 1.0928178  | -0.5906569 |
| H | 4.5838179  | 0.9346845  | -1.5500245 |
| N | -2.5939722 | 1.3260974  | 0.0718793  |
| N | -2.8839319 | 2.4472475  | -0.3051904 |
| N | -3.2202127 | 3.4400545  | -0.7183152 |
| N | 2.6521967  | 1.1344753  | -0.7923899 |
| C | 2.2140107  | 2.1057430  | -1.7691618 |
| H | 2.7035897  | 1.9118959  | -2.7272721 |
| H | 1.1405670  | 2.0750111  | -1.9261024 |
| H | 2.4838127  | 3.1164846  | -1.4463102 |

**Ac-(4R)Azp-NMe<sub>2</sub>(3R-NMe<sub>2</sub>) exo cis**

**Ψ = 165.6°, C<sup>δ</sup>-C<sup>γ</sup>-N-N torsion = -74.2°**

|   |            |            |            |
|---|------------|------------|------------|
| H | -0.2962282 | 2.6507052  | -0.2339481 |
| C | -0.1487062 | 1.7988494  | 0.4296849  |
| C | -1.4471505 | 1.3364605  | 1.0885303  |
| C | -1.1713665 | -0.1305160 | 1.3789391  |

|   |            |            |            |   |            |            |            |
|---|------------|------------|------------|---|------------|------------|------------|
| N | -0.4024532 | -0.5348146 | 0.2201089  | C | 1.7801492  | 0.6199647  | 0.3865086  |
| C | 0.3938677  | 0.5520888  | -0.3078423 | H | 4.1943142  | 0.1685924  | 0.7257667  |
| H | 0.5492529  | 2.1057111  | 1.2110501  | O | -1.0824481 | -2.6732670 | 0.0072202  |
| H | -1.6702490 | 1.8962595  | 1.9937579  | C | 0.8827485  | -1.9030398 | -1.1140118 |
| H | -0.5845382 | -0.2313555 | 2.2991081  | H | 1.0100675  | -1.0618640 | -1.7976921 |
| H | -2.0730643 | -0.7325508 | 1.4699854  | H | 0.7689996  | -2.8245542 | -1.6802508 |
| C | -0.3998846 | -1.8128144 | -0.2279045 | H | 1.7897239  | -1.9761893 | -0.5080352 |
| H | 4.5124315  | 1.9735198  | 0.1072172  | O | 2.5102267  | 1.2374250  | -0.3815055 |
| H | 0.2364566  | 0.6285077  | -1.3855128 | C | 3.6893103  | -0.1677451 | 1.6270700  |
| C | 1.8854850  | 0.3643539  | -0.0008095 | H | 4.0209405  | 0.4434068  | 2.4718174  |
| H | 4.3449882  | 0.2134243  | 0.2984242  | N | -2.5826456 | 1.5423667  | -0.3036898 |
| O | -1.0466229 | -2.6837022 | 0.3384331  | N | -2.7736705 | 2.7216622  | -0.5455329 |
| C | 0.4122383  | -2.0935840 | -1.4614995 | N | -2.9997553 | 3.7799173  | -0.8565825 |
| H | 0.1435237  | -1.4203892 | -2.2792189 | N | 2.2558169  | -0.0593688 | 1.4483446  |
| H | 0.2301853  | -3.1211628 | -1.7666927 | C | 1.4644588  | -0.7164462 | -2.4667595 |
| H | 1.4766690  | -1.9655456 | -1.2529053 | H | 0.4876145  | -0.2593742 | 2.5835134  |
| O | 2.2292678  | -0.4433812 | 0.8503164  | H | 1.3320805  | -1.7820974 | 2.2551921  |
| C | 4.1709410  | 1.0504561  | -0.3718096 | H | 1.9865775  | -0.6192378 | 3.4203091  |
| H | 4.7409065  | 0.9069390  | -1.2932628 |   |            |            |            |
| N | -2.6383683 | 1.5141224  | 0.2371256  |   |            |            |            |
| N | -2.5367609 | 1.2361381  | -0.9437756 |   |            |            |            |
| N | -2.5585427 | 1.0299867  | -2.0524672 |   |            |            |            |
| N | 2.7594486  | 1.1339826  | -0.6808429 |   |            |            |            |
| C | 2.4099831  | 2.1726198  | -1.6233670 |   |            |            |            |
| H | 3.0188882  | 2.0659424  | -2.5246293 |   |            |            |            |
| H | 1.3661313  | 2.1247972  | -1.9177239 |   |            |            |            |
| H | 2.6030138  | 3.1618654  | -1.1955367 |   |            |            |            |

**Ac-(4R)Azp-NMe<sub>2</sub>(3R-NMe<sub>2</sub>) exo cis**

**Ψ = -38.2°, C<sup>δ</sup>-C<sup>γ</sup>-N-N torsion = 66.4°**

|   |            |            |            |
|---|------------|------------|------------|
| H | -0.4015716 | 2.7525156  | 0.3813887  |
| C | -0.4771827 | 1.7867750  | 0.8774243  |
| C | -1.9035213 | 1.2739002  | 0.9647059  |
| C | -1.7092508 | -0.2205727 | 1.1831520  |
| N | -0.5021201 | -0.5166692 | 0.4300461  |
| C | 0.2533879  | 0.6843722  | 0.1004828  |
| H | -0.0723945 | 1.8875715  | 1.8864145  |
| H | -2.4673440 | 1.7387671  | 1.7771254  |
| H | -1.5837987 | -0.4348459 | 2.2508487  |
| H | -2.5384184 | -0.8321902 | 0.8255933  |
| C | -0.2802206 | -1.7604110 | -0.0558352 |
| H | 4.0084434  | -0.9719703 | 1.8758116  |
| H | 0.1759822  | 0.8897668  | -0.9702699 |
| C | 1.7599586  | 0.6970170  | 0.3614926  |
| H | 4.1919982  | 0.3362812  | 0.6808863  |
| O | -1.0162499 | -2.6924085 | 0.2450698  |
| C | 0.9099965  | -1.9426152 | -0.9553746 |
| H | 1.0001029  | -1.1437039 | -1.6935123 |
| H | 0.8141628  | -2.9015705 | -1.4592711 |
| H | 1.8290785  | -1.9498348 | -0.3634419 |
| C | 2.4579846  | 1.2790009  | -0.4618851 |
| O | 3.7139066  | 0.0470835  | 1.6127081  |
| H | 4.0444697  | 0.7213752  | 2.4083917  |
| N | -2.5579538 | 1.5659889  | -0.3266343 |
| N | -3.7123367 | 1.1880639  | -0.4298611 |
| N | -4.7782350 | 0.8812495  | -0.6216718 |
| N | 2.2748087  | 0.1053440  | 1.4573218  |
| C | 1.5222090  | -0.5026040 | 2.5339476  |
| H | 0.5351262  | -0.0654053 | 2.6403189  |
| H | 1.4163648  | -1.5833713 | 2.3973106  |
| H | 2.0594523  | -0.3268777 | 3.4676846  |

**Ac-(4R)Azp-NMe<sub>2</sub>(3R-NMe<sub>2</sub>) exo cis**

**Ψ = -37.9°, C<sup>δ</sup>-C<sup>γ</sup>-N-N torsion = -179.7°**

|   |            |            |            |
|---|------------|------------|------------|
| H | -0.3082557 | 2.7357612  | 0.5068955  |
| C | -0.4324407 | 1.7395769  | 0.9309211  |
| C | -1.8796949 | 1.2603083  | 0.9643014  |
| C | -1.7324940 | -0.2439702 | 1.0817565  |
| N | -0.5191555 | -0.5260655 | 0.3304698  |
| C | 0.2794949  | 0.6684785  | 0.0960044  |
| H | -0.0438701 | 1.7645992  | 1.9516812  |
| H | -2.4427322 | 1.6841072  | 1.7993086  |
| H | -1.6321970 | -0.5369187 | 2.1325189  |
| H | -2.5757612 | -0.7886862 | 0.6601919  |
| C | -0.3189585 | -1.7437964 | -0.2250505 |
| H | 3.9510323  | -1.2096824 | 1.8276651  |
| H | 0.2331770  | 0.9458480  | -0.9602292 |

**Ac-(4R)Azp-NMe<sub>2</sub>(3R-NMe<sub>2</sub>) exo cis**

**Ψ = -37.9°, C<sup>δ</sup>-C<sup>γ</sup>-N-N torsion = -29.4°**

|   |            |            |            |
|---|------------|------------|------------|
| H | -0.2898331 | 2.7107260  | 0.3301934  |
| C | -0.4059593 | 1.7462106  | 0.8205034  |
| C | -1.8595961 | 1.2861243  | 0.8955957  |
| C | -1.7246805 | -0.2146122 | 1.1005116  |
| N | -0.5244047 | -0.5505494 | 0.3491425  |
| C | 0.2907971  | 0.6189213  | 0.0479053  |
| H | -0.0056400 | 1.8287943  | 1.8339095  |
| H | -2.3937434 | 1.7651483  | 1.7134499  |
| H | -1.6128521 | -0.4429405 | 2.1659241  |
| H | -2.5751905 | -0.7897186 | 0.7333921  |
| C | -0.3465073 | -1.8007903 | -0.1448264 |
| H | 3.9357903  | -1.2226922 | 1.8719452  |
| H | 0.2531853  | 0.8352977  | -1.0237863 |
| C | 1.7921294  | 0.5627876  | 0.3364912  |
| H | 4.1990427  | 0.0846332  | 0.6910864  |
| O | -1.1207401 | -2.7031969 | 0.1449301  |
| C | 0.8390420  | -2.0197295 | -1.0413905 |
| H | 0.9568647  | -1.2218564 | -1.7769071 |
| H | 0.7124189  | -2.9730214 | -1.5490127 |
| H | 1.7562462  | -2.0585395 | -0.4478125 |
| O | 2.5283874  | 1.1246640  | -0.4669352 |
| C | 3.6919716  | -0.1896349 | 1.6120525  |
| H | 4.0378455  | 0.4636237  | 2.4186613  |
| N | -2.6076114 | 1.6622165  | -0.3192452 |
| N | -2.5698012 | 0.9057903  | -1.2732236 |
| N | -2.6174289 | 0.2808951  | -2.2099884 |
| N | 2.2597405  | -0.0663141 | -1.4318997 |
| C | 1.4600570  | -0.6501176 | 2.4878179  |
| H | 0.4961209  | -0.1622531 | 2.5868807  |
| H | 1.3000335  | -1.7216960 | 2.3334150  |
| H | 1.9910927  | -0.5159974 | 3.4318039  |

**Ac-(4R)Azp-NMe<sub>2</sub>(3R-NMe<sub>2</sub>) exo trans**

**Ψ = 131.2°, C<sup>δ</sup>-C<sup>γ</sup>-N-N torsion = -73.5°**

|   |            |            |            |
|---|------------|------------|------------|
| H | -0.5055439 | 2.8159007  | 0.3689086  |
| C | -0.3555571 | 1.8497833  | 0.8503650  |
| C | -1.6663561 | 1.1999402  | 1.2914913  |
| C | -1.3039747 | -0.2787158 | 1.3369922  |
| N | -0.4026286 | -0.4143179 | 0.2102378  |
| C | 0.3083730  | 0.8214023  | -0.0807135 |
| H | 0.2676000  | 1.9957797  | 1.7337832  |
| H | -1.9991144 | 1.5614303  | 2.2617391  |
| H | -0.7951398 | -0.5062943 | 2.2803105  |
| H | -2.1784575 | -0.9202896 | -1.2398986 |
| C | -0.1257926 | -1.5306333 | -0.4943708 |
| H | 4.6119712  | 1.8790170  | -0.6281629 |
| H | 0.1601284  | 1.0695293  | -1.1300463 |
| C | 1.7914375  | 0.6705729  | 0.2638950  |
| H | 4.2249455  | 0.7919027  | 0.7267583  |
| O | 0.6969908  | -1.5035060 | -1.4038637 |
| C | -0.8721952 | -2.7784890 | -0.1163797 |
| H | -0.7277938 | -3.0160631 | 0.9399292  |
| H | -0.5069833 | -3.5999860 | -0.7280231 |
| H | -1.9447376 | -2.6538618 | -0.2858168 |
| O | 2.0897339  | 0.2525582  | 1.3781231  |
| C | 4.1049002  | 0.9553219  | -0.3409569 |

|   |            |           |            |
|---|------------|-----------|------------|
| H | 4.5627941  | 0.1210110 | -0.8815889 |
| N | -2.8042524 | 1.4604376 | 0.3911005  |
| N | -2.6102524 | 1.4000993 | -0.8100269 |
| N | -2.5554563 | 1.3879283 | -1.9361537 |
| N | 2.6948474  | 1.0539113 | -0.6529147 |
| C | 2.3493850  | 1.3906003 | -2.0236597 |
| H | 1.7943681  | 0.5779318 | -2.4963911 |
| H | 1.7722540  | 2.3161703 | -2.0847117 |
| H | 3.2740349  | 1.5411502 | -2.5780910 |

**Ac-(4R)Azp-NMe<sub>2</sub>(3R-NMe<sub>2</sub>) exo trans**

**Ψ =131.3°, C<sup>δ</sup>-C<sup>γ</sup>-N-N torsion = -176.4°**

|   |            |            |            |
|---|------------|------------|------------|
| H | -0.4327984 | 2.7830304  | 0.4993439  |
| C | -0.3601887 | 1.7817186  | 0.9251737  |
| C | -1.7119394 | 1.1718559  | 1.2786702  |
| C | -1.3949950 | -0.3092672 | 1.3431712  |
| N | -0.4109144 | -0.4725908 | 0.2898092  |
| C | 0.2667068  | 0.7716747  | -0.0411807 |
| H | 0.2415150  | 1.8360413  | 1.8347390  |
| H | -2.1098650 | 1.5489227  | 2.2240156  |
| H | -0.9745964 | -0.5556140 | 2.3238343  |
| H | -2.2790117 | -0.9217743 | 1.1709910  |
| C | -0.1170901 | -1.5994577 | -0.3844151 |
| H | 4.5199886  | 1.8873094  | -0.8585500 |
| H | 0.0494722  | 1.0261450  | -1.0774392 |
| C | 1.7685582  | 0.6485796  | 0.2217018  |
| H | 4.2202546  | 0.8518772  | 0.5574610  |
| O | 0.7175132  | -1.5891912 | -1.2853324 |
| C | -0.8558988 | -2.8455493 | 0.0158340  |
| H | -0.7774194 | -3.0250699 | 1.0902057  |
| H | -0.4354752 | -3.6884613 | -0.5275838 |
| H | -1.9172650 | -2.7557163 | -0.2301618 |
| O | 2.1378995  | 0.2473481  | 1.3202352  |
| C | 4.0395807  | 0.9715921  | -0.5075320 |
| H | 4.4769662  | 0.1199550  | -1.0385801 |
| N | -2.7147056 | 1.3640467  | 0.2093035  |
| N | -3.0274031 | 2.5194473  | -0.0160148 |
| N | -3.3812243 | 3.5513295  | -0.2969311 |
| C | 2.6137076  | 1.0467062  | -0.7443613 |
| N | 2.1907450  | 1.3447903  | -2.1018270 |
| H | 1.6374407  | 0.5066625  | -2.5301439 |
| H | 1.5828811  | 2.2511483  | -2.1518863 |
| H | 3.0817333  | 1.5113864  | -2.7047900 |

**Ac-(4R)Azp-NMe<sub>2</sub>(3R-NMe<sub>2</sub>) exo trans**

**Ψ =131.4°, C<sup>δ</sup>-C<sup>γ</sup>-N-N torsion = 65.2°**

|   |            |            |            |
|---|------------|------------|------------|
| H | -0.4822136 | 2.7584196  | 0.4951280  |
| C | -0.3914862 | 1.7621502  | 0.9251590  |
| C | -1.7366327 | 1.1484255  | 1.2692336  |
| C | -1.4067115 | -0.3367598 | 1.3418806  |
| N | -0.4174992 | -0.4949512 | 0.2946750  |
| C | 0.2451741  | 0.7570158  | -0.0404913 |
| H | 0.2080508  | 1.8172384  | 1.8353844  |
| H | -2.1442604 | 1.5264596  | 2.2100121  |
| H | -0.9907053 | -0.5723859 | 2.3278780  |
| H | -2.2778021 | -0.9728349 | 1.1781731  |
| C | -0.1116966 | -1.6215321 | -0.3753363 |
| H | 4.4903194  | 1.9032421  | -0.8709448 |
| H | 0.0203858  | 1.0075380  | -1.0760270 |
| C | 1.7486232  | 0.6484349  | 0.2183890  |
| H | 4.2005218  | 0.8648078  | 0.5449213  |
| O | 0.7241418  | -1.6065497 | -1.2745488 |
| C | -0.8404226 | -2.8731453 | 0.0270032  |
| H | -0.7680779 | -3.0466397 | 1.1027535  |
| H | -0.4076755 | -3.7144791 | -0.5090970 |
| H | -1.9009203 | -2.7969718 | -0.2279786 |
| O | 2.1248725  | 0.2491992  | 1.3151309  |
| C | 4.0147491  | 0.9853447  | -0.5190987 |
| H | 4.4529918  | 0.1359826  | -1.0531776 |
| N | -2.6707252 | 1.4562701  | 0.1652287  |
| N | -3.7865678 | 0.9785751  | 0.2682463  |
| N | -4.8404341 | 0.5810504  | 0.2726157  |
| N | 2.5875921  | 1.0554039  | -0.7495164 |
| C | 2.1577223  | 1.3507772  | -2.1053604 |
| H | 1.6256969  | 0.5017105  | -2.5394644 |
| H | 1.5266609  | 2.2411679  | -2.1497382 |
| H | 3.0443800  | 1.5444904  | -2.7066030 |

**Ac-(4R)Azp-NMe<sub>2</sub>(3R-NMe<sub>2</sub>) exo trans**

**Ψ =-39.0°, C<sup>δ</sup>-C<sup>γ</sup>-N-N torsion = -178.1°**

|   |            |            |            |
|---|------------|------------|------------|
| H | -0.3326021 | 2.7033098  | 0.5912955  |
| C | -0.4513160 | 1.7013904  | 1.0030641  |
| C | -1.8977054 | 1.2183412  | 1.0296027  |
| C | -1.7465626 | -0.2884647 | 1.1345471  |
| N | -0.5250052 | -0.5586397 | 0.3934858  |
| C | 0.2634920  | 0.6423709  | 0.1604505  |
| H | -0.0652444 | 1.7166287  | 2.0253131  |
| H | -2.4654212 | 1.6303457  | 1.8675560  |
| H | -1.6538880 | -0.5818802 | 2.1867495  |
| H | -2.6037453 | -0.8073147 | 0.7075070  |
| C | -0.1896555 | -1.7281119 | -0.1935082 |
| H | 4.0324079  | 0.3092358  | 2.5436543  |
| H | 0.2095057  | 0.9037982  | -0.8990289 |
| C | 1.7670529  | 0.5934543  | 0.4274587  |
| H | 3.9738592  | -1.2538383 | 1.7017391  |
| O | 0.8235700  | -1.8199957 | -0.8748175 |
| C | -1.1106668 | -2.8925781 | 0.0447710  |
| H | -1.3455635 | -3.0121346 | 1.1046443  |
| H | -0.6325963 | -3.7946893 | -0.3297163 |
| H | -2.0532823 | -2.7431978 | -0.4886316 |
| O | 2.4799044  | 1.2397470  | -0.3321852 |
| C | 3.6973318  | -0.1978327 | 1.6338808  |
| H | 4.1870359  | 0.2498469  | 0.7738541  |
| N | -2.6038505 | 1.5027874  | -0.2356113 |
| N | -2.7724874 | 2.6835810  | -0.4880336 |
| N | -2.9792271 | 3.7427840  | -0.8082307 |
| N | 2.2622317  | -0.0796725 | 1.4856868  |
| C | 1.4915928  | -0.7973044 | 2.4746390  |
| H | 0.5129778  | -0.3538761 | 2.6309827  |
| H | 1.3673215  | -1.8519964 | 2.2073360  |
| H | 2.0257410  | -0.7481800 | 3.4254223  |

**Ac-(4R)Azp-NMe<sub>2</sub>(3R-NMe<sub>2</sub>) exo trans**

**Ψ =-39.3°, C<sup>δ</sup>-C<sup>γ</sup>-N-N torsion = 66.0°**

|   |            |            |            |
|---|------------|------------|------------|
| H | -0.4185226 | 2.7265590  | 0.4889114  |
| C | -0.4957664 | 1.7477697  | 0.9581690  |
| C | -1.9235031 | 1.2335226  | 1.0166376  |
| C | -1.7304076 | -0.2678019 | 1.2038302  |
| N | -0.5086334 | -0.5436761 | 0.4686459  |
| C | 0.2421617  | 0.6665709  | 0.1642247  |
| H | -0.1031660 | 1.8227319  | 1.9745711  |
| H | -2.4996303 | 1.6760226  | 1.8329240  |
| H | -1.6241015 | -0.4965765 | 2.2714304  |
| H | -2.5727463 | -0.8483876 | 0.8250387  |
| C | -0.1452775 | -1.7336054 | -0.0585102 |
| H | 4.0398166  | 0.582483   | 2.5256553  |
| H | 0.1680642  | 0.8710546  | -0.9064818 |
| C | 1.7489216  | 0.6712887  | 0.4165656  |
| H | 4.0150900  | -1.0457614 | 1.7624421  |
| O | 0.8645202  | -1.8339403 | -0.7430603 |
| C | -1.0320620 | -2.9085932 | 0.2490819  |
| H | -1.2573922 | -2.9776478 | 1.3154497  |
| H | -0.5310670 | -3.8159106 | -0.0800608 |
| H | -1.9815287 | -2.8158736 | -0.2854026 |
| O | 2.4380468  | 1.2909749  | -0.3856880 |
| C | 3.7101710  | -0.0019097 | 1.6451606  |
| H | 4.1802018  | 0.4148245  | 0.7590240  |
| N | -2.5651470 | 1.5519393  | -0.2745584 |
| N | -3.7150417 | 1.1688128  | -0.4004263 |
| N | -4.7758854 | 0.8561546  | -0.6120578 |
| N | 2.2711900  | 0.0719811  | 1.5061398  |
| C | 1.5291829  | -0.6107432 | 2.5405950  |
| H | 0.5401111  | -0.1860220 | 2.6824577  |
| H | 1.4317424  | -1.6815779 | 2.3328024  |
| H | 2.0698721  | -0.4950852 | 3.4818802  |

**Ac-(4R)Azp-NMe<sub>2</sub>(3R-NMe<sub>2</sub>) exo trans**

**Ψ =-39.0°, C<sup>δ</sup>-C<sup>γ</sup>-N-N torsion = -26.1°**

|   |            |            |           |
|---|------------|------------|-----------|
| H | -0.3070885 | 2.6832533  | 0.4250687 |
| C | -0.4212577 | 1.7090063  | 0.8960159 |
| C | -1.8744571 | 1.2449517  | 0.9510727 |
| C | -1.7363217 | -0.2599855 | 1.1373851 |
| N | -0.5255578 | -0.5795679 | 0.3972250 |
| C | 0.2820240  | 0.5987299  | 0.1110670 |
| H | -0.0301174 | 1.7740315  | 1.9146037 |

|   |            |            |            |
|---|------------|------------|------------|
| H | -2.4203930 | 1.7086642  | 1.7703002  |
| H | -1.6339918 | -0.4916537 | 2.2038194  |
| H | -2.6001422 | -0.8097340 | 0.7618696  |
| C | -0.2097790 | -1.7789073 | -0.1450411 |
| H | 4.0393791  | 0.3229257  | 2.5163030  |
| H | 0.2420870  | 0.8060966  | -0.9618762 |
| C | 1.7845467  | 0.5396516  | 0.3849325  |
| H | 3.9559822  | -1.2813712 | 1.7580002  |
| O | 0.8004583  | -1.9105566 | -0.8217761 |
| C | -1.1530331 | -2.9159352 | 0.1317054  |
| H | -1.3917709 | -2.9954006 | 1.1943225  |
| H | -0.6927490 | -3.8391667 | -0.2120436 |
| H | -2.0915714 | -2.7667220 | -0.4097032 |
| O | 2.5087224  | 1.1373040  | -0.4026980 |
| C | 3.6979114  | -0.2259459 | 1.6336014  |
| H | 4.1971865  | 0.1672943  | 0.7527057  |
| N | -2.6096694 | 1.6330233  | -0.2679744 |
| N | -2.6074528 | 0.8608815  | -1.2094397 |
| N | -2.6868804 | 0.2194070  | -2.1328857 |
| N | 2.2652417  | -0.0917840 | 1.4746472  |
| C | 1.4788644  | -0.7451957 | 2.4952279  |
| H | 0.5121798  | -0.2701074 | 2.6325468  |
| H | 1.3281977  | -1.8075907 | 2.2766902  |
| H | 2.0152813  | -0.6658659 | 3.4425617  |

**Ac-(4R)Azp-OMe (3R-OMe) exo cis**

$\Psi = 156.9^\circ$ ,  $C^\delta-C^{\gamma}-N-N$  torsion =  $66.1^\circ$

|   |            |            |            |
|---|------------|------------|------------|
| H | -0.1619409 | 2.6352688  | 0.3029086  |
| C | -0.1728142 | 1.6644809  | 0.7943472  |
| C | -1.5715044 | 1.1690798  | 1.1111277  |
| C | -1.3576641 | -0.3268447 | 1.2845442  |
| N | -0.3304957 | -0.6254557 | 0.3019731  |
| C | 0.4134709  | 0.5518338  | -0.0939872 |
| H | 0.3903809  | 1.7340381  | 1.7274410  |
| H | -1.9840988 | 1.6354114  | 2.0090279  |
| H | -1.0141488 | -0.5438062 | 2.3015101  |
| H | -2.2477986 | -0.9279410 | 1.0967801  |
| C | -0.2172957 | -1.8617816 | -0.2371677 |
| H | 4.3700187  | 2.0333514  | -1.1393678 |
| H | 0.2554079  | 0.7876367  | -1.1495958 |
| C | 1.9021975  | 0.4379021  | 0.1662664  |
| H | 4.2142974  | 1.6343509  | 0.5985882  |
| O | -0.9199876 | -2.7851048 | 0.1537189  |
| C | 0.8087769  | -2.0466915 | -1.3201812 |
| H | 0.8136973  | -1.2242243 | -2.0380325 |
| H | 0.5959164  | -2.9794320 | -1.8374027 |
| H | 1.8037589  | -2.1137510 | -0.8732391 |
| O | 2.4053823  | -0.2660476 | 1.0017674  |
| O | 2.5753355  | 1.2642950  | -0.6258397 |
| C | 3.9915595  | 1.3127745  | -0.4191820 |
| H | 4.4316501  | 0.3305196  | -0.5930613 |
| N | -2.4266756 | 1.4805893  | -0.0521005 |
| N | -3.5848898 | 1.1088559  | 0.0299183  |
| N | -4.6697189 | 0.8094002  | 0.0105199  |

**Ac-(4R)Azp-OMe (3R-OMe) exo cis**

$\Psi = -31.3^\circ$ ,  $C^\delta-C^{\gamma}-N-N$  torsion =  $66.1^\circ$

|   |            |            |            |
|---|------------|------------|------------|
| H | -0.3083498 | 2.7066254  | 0.4161874  |
| C | -0.3065972 | 1.7266112  | 0.8889106  |
| C | -1.6983426 | 1.1663084  | 1.1151422  |
| C | -1.4294404 | -0.3218318 | 1.2795356  |
| N | -0.3326241 | -0.5586890 | 0.3570496  |
| C | 0.3765481  | 0.6595389  | 0.0150443  |
| H | 0.1991331  | 1.8009463  | 1.8538821  |
| H | -2.1831252 | 1.5991204  | 1.9935425  |
| H | -1.1386598 | -0.5414951 | 2.3123359  |
| H | -2.2792732 | -0.9575963 | 1.0293174  |
| C | -0.1239900 | -1.7816366 | -0.1827739 |
| H | 3.6358749  | -0.7667572 | 2.5733240  |
| H | 0.2608692  | 0.9041046  | -1.0436725 |
| C | 1.8641614  | 0.6554289  | 0.3009047  |
| H | 4.1735527  | -0.4665775 | 0.8931715  |
| O | -0.7979879 | -2.7447523 | 0.1597711  |
| C | 0.9739827  | -1.8992634 | -1.2031887 |
| H | 0.9673066  | -1.0780581 | -1.9220925 |
| H | 0.8548776  | -2.8446030 | -1.7275123 |
| H | 1.9459446  | -1.9019380 | -0.7027267 |

|   |            |            |            |
|---|------------|------------|------------|
| O | 2.6528839  | 1.3092706  | -0.3327037 |
| O | 2.1804593  | -0.0932465 | 1.3487312  |
| C | 3.5631919  | -0.0992090 | 1.7187979  |
| H | 3.8870277  | 0.9065466  | 1.9878722  |
| N | -2.4964993 | 1.4596267  | -0.0921974 |
| N | -3.6401525 | 1.0372653  | -0.0842299 |
| N | -4.7077629 | 0.6918496  | -0.1722738 |

**Ac-(4R)Azp-OMe (3R-OMe) exo cis**

$\Psi = 156.7^\circ$ ,  $C^\delta-C^{\gamma}-N-N$  torsion =  $-179.9^\circ$

|   |            |            |            |
|---|------------|------------|------------|
| H | -0.1211804 | 2.6642671  | 0.3320310  |
| C | -0.1521179 | 1.6846724  | 0.8080097  |
| C | -1.5593030 | 1.1936055  | 1.1268840  |
| C | -1.3597767 | -0.3001358 | 1.2760120  |
| N | -0.3374202 | -0.5954983 | 0.2856641  |
| C | 0.4212283  | 0.5771579  | -0.0938990 |
| H | 0.4131101  | 1.7405608  | 1.7416317  |
| H | -1.9632739 | 1.6490545  | 2.0341108  |
| H | -1.0140021 | -0.5377836 | 2.2867997  |
| H | -2.2619217 | -0.8747734 | 1.0737640  |
| C | -0.2284078 | -1.8287276 | -0.2610308 |
| H | 4.3952900  | 2.0247678  | -1.1203567 |
| H | 0.2699404  | 0.8278723  | -1.1470447 |
| C | 1.9084512  | 0.4442959  | 0.1676447  |
| H | 4.2335668  | 1.6109338  | 0.6135770  |
| O | -0.9320491 | -2.7529792 | 0.1256776  |
| C | 0.7948133  | -2.0101151 | -1.3476904 |
| H | 0.8074631  | -1.1795751 | -2.0560480 |
| H | 0.5723339  | -2.9346130 | -1.8756089 |
| H | 1.7894516  | -2.0929772 | -0.9025800 |
| O | 2.4024934  | -0.2734811 | 0.9967138  |
| O | 2.5916414  | 1.2709944  | -0.6156163 |
| C | 4.0081576  | 1.3016158  | -0.4073961 |
| H | 4.4373170  | 0.3161894  | -0.5903706 |
| N | -2.4891127 | 1.4138777  | 0.0006505  |
| N | -2.7478234 | 2.5790942  | -0.2448299 |
| N | -3.0503611 | 3.6207160  | -0.5478255 |

**Ac-(4R)Azp-OMe (3R-OMe) exo cis**

$\Psi = -31.1^\circ$ ,  $C^\delta-C^{\gamma}-N-N$  torsion =  $-179.8^\circ$

|   |            |            |            |
|---|------------|------------|------------|
| H | -0.2343393 | 2.7118629  | 0.4677090  |
| C | -0.2663917 | 1.7153259  | 0.9068794  |
| C | -1.6752724 | 1.1743852  | 1.1199998  |
| C | -1.4403429 | -0.3174213 | 1.2336912  |
| N | -0.3485567 | -0.5497092 | 0.3021434  |
| C | 0.3939622  | 0.6592356  | 0.0035576  |
| H | 0.2388068  | 1.7534076  | 1.8750623  |
| H | -2.1486230 | 1.5872163  | 2.0140050  |
| H | -1.1524582 | -0.5796995 | 2.2565425  |
| H | -2.3099876 | -0.9102131 | 0.9554609  |
| C | -0.1597802 | -1.7618768 | -0.2680353 |
| H | 3.6005128  | -0.9303356 | 2.5326167  |
| H | 0.2943981  | 0.9395562  | -1.0479264 |
| C | 1.8791430  | 0.6100108  | 0.2991163  |
| H | 4.1572961  | -0.5850988 | 0.8673874  |
| O | -0.8494559 | -2.7223311 | 0.0495807  |
| C | 0.9369029  | -1.8720833 | -1.2910615 |
| H | 0.9484690  | -1.0303860 | -1.9857893 |
| H | 0.7985393  | -2.7989499 | -1.8429576 |
| H | 1.9080929  | -1.9104663 | -0.7905212 |
| O | 2.6872724  | 1.2663744  | -0.3069245 |
| O | 2.1700806  | -0.1811744 | 1.3225492  |
| C | 3.5496147  | -0.2322433 | 1.7012689  |
| H | 3.8945601  | 0.7558557  | 2.0070531  |
| N | -2.5393184 | 1.4051771  | -0.0550185 |
| N | -2.8167756 | 2.5703684  | -0.2805213 |
| N | -3.1311668 | 3.6121845  | -0.5699015 |

**Ac-(4R)Azp-OMe (3R-OMe) exo cis**

$\Psi = 166.0^\circ$ ,  $C^\delta-C^{\gamma}-N-N$  torsion =  $-68.2^\circ$

|   |            |            |            |
|---|------------|------------|------------|
| H | -0.1457545 | 2.6917832  | 0.0773621  |
| C | -0.0837149 | 1.7676180  | 0.6497124  |
| C | -1.4448929 | 1.2709641  | 1.1346952  |
| C | -1.2211133 | -0.2258394 | 1.2897379  |
| N | -0.3436133 | -0.5302067 | 0.1748804  |
| C | 0.4857924  | 0.5968244  | -0.1864063 |
| H | 0.5482595  | 1.9542524  | 1.5200775  |



|   |            |            |            |
|---|------------|------------|------------|
| H | -1.7361460 | 1.7366130  | 2.0730887  |
| H | -0.7353170 | -0.4396544 | 2.2481887  |
| H | -2.1361044 | -0.8114674 | 1.2253600  |
| C | -0.3445081 | -1.7460079 | -0.4268675 |
| H | 4.5409034  | 2.0726258  | -0.7359222 |
| H | 0.4191910  | 0.8149553  | -1.2550012 |
| C | 1.9492466  | 0.3920780  | 0.1600686  |
| H | 4.2614249  | 1.4267842  | 0.9097663  |
| O | -1.0573900 | -2.6512245 | -0.0181793 |
| C | 0.5548833  | -1.9088891 | -1.6201903 |
| H | 0.3669792  | -1.1376053 | -2.3709789 |
| H | 0.3728223  | -2.8880170 | -2.0562177 |
| H | 1.6039887  | -1.8424671 | -1.3227576 |
| O | 2.3727240  | -0.4488193 | 0.9079710  |
| O | 2.6958740  | 1.3030025  | -0.4526079 |
| C | 4.0968347  | 1.2677132  | -0.1562622 |
| H | 4.5198763  | 0.3064819  | -0.4490035 |
| N | -2.5508693 | 1.5796840  | 0.2117671  |
| N | -2.3975677 | 1.3262729  | -0.9700854 |
| N | -2.3739365 | 1.1520620  | -2.0838097 |

**Ac-(4R)Azp-OMe (3R-OMe) exo cis**

$\Psi = -30.5^\circ$ ,  $C^\delta-C^{\gamma}-N-N$  torsion =  $-36.5^\circ$

|   |            |            |            |
|---|------------|------------|------------|
| H | -0.1270637 | 2.8035176  | 0.4414983  |
| C | -0.1795248 | 1.8071010  | 0.8752622  |
| C | -1.6095143 | 1.3213305  | 1.0978379  |
| C | -1.4381638 | -0.1870863 | 1.1664814  |
| N | -0.3738366 | -0.4380065 | 0.2077573  |
| C | 0.4409725  | 0.7356645  | -0.0415690 |
| H | 0.3358102  | 1.8190222  | 1.8387209  |
| H | -2.0313021 | 1.7282886  | 2.0140223  |
| H | -1.1442754 | -0.4891827 | 2.1766805  |
| H | -2.3338959 | -0.7449519 | 0.8941467  |
| C | -0.2500720 | -1.6403520 | -0.4058945 |
| H | 3.4888987  | -1.1258185 | 2.4957495  |
| H | 0.3876730  | 1.0446396  | -1.0889715 |
| C | 1.9142145  | 0.5921041  | 0.2838935  |
| H | 4.1068642  | -0.7512422 | 0.8586449  |
| O | -0.9875947 | -2.5718952 | -0.1160413 |
| C | 0.8292165  | -1.7657654 | -1.4443576 |
| H | 0.8518375  | -0.9136658 | -2.1262682 |
| H | 0.6580903  | -2.6796226 | -2.0083242 |
| H | 1.8069882  | -1.8352530 | -0.9601682 |
| O | 2.7713552  | 1.2233486  | -0.2793773 |
| O | 2.1342295  | -0.2521384 | 1.2818362  |
| C | 3.4988003  | -0.3956029 | 1.6909857  |
| H | 3.8900198  | 0.5594083  | 2.0426525  |
| N | -2.5224474 | 1.7738367  | 0.0330792  |
| N | -2.5211471 | 1.1696721  | -1.0252158 |
| N | -2.6189453 | 0.6908813  | -2.0407931 |

**Ac-(4R)Azp-OMe (3R-OMe) exo trans**

$\Psi = 143.8^\circ$ ,  $C^\delta-C^{\gamma}-N-N$  torsion =  $-178.0^\circ$

|   |            |            |            |
|---|------------|------------|------------|
| H | -0.2090792 | 2.6810219  | 0.4048950  |
| C | -0.2287961 | 1.6895736  | 0.8567612  |
| C | -1.6351184 | 1.1817817  | 1.1590880  |
| C | -1.4259417 | -0.3152663 | 1.2818861  |
| N | -0.3853402 | -0.5785782 | 0.3037267  |
| C | 0.3578224  | 0.6101893  | -0.0607020 |
| H | 0.3320240  | 1.7287031  | 1.7937933  |
| H | -2.0493612 | 1.6145197  | 2.0729627  |
| H | -1.0945834 | -0.5630877 | 2.2956858  |
| H | -2.3376258 | -0.8696760 | 1.0626123  |
| C | -0.0938643 | -1.7587566 | -0.2812814 |
| H | 4.4070871  | 1.5332554  | -1.4002380 |
| H | 0.2083619  | 0.8467873  | -1.1163942 |
| C | 1.8424639  | 0.4370413  | 0.1942485  |
| H | 4.2695382  | 1.4477237  | 0.3824241  |
| O | 0.8014319  | -1.8335794 | -1.1153596 |
| C | -0.9136916 | -2.9450018 | 0.1392417  |
| H | -0.9144553 | -3.0601755 | 1.2253685  |
| H | -0.4977236 | -3.8370300 | -0.3229669 |
| H | -1.9512493 | -2.8251103 | -0.1833947 |
| O | 2.3027514  | -0.1242941 | 1.1544298  |
| O | 2.5639911  | 1.0466162  | -0.7374338 |
| C | 3.9822625  | 0.9857123  | -0.5628110 |
| H | 4.3174354  | -0.0518304 | -0.5752322 |

|   |            |           |            |
|---|------------|-----------|------------|
| N | -2.5658245 | 1.4092884 | 0.0351679  |
| N | -2.8071773 | 2.5767777 | -0.2179526 |
| N | -3.0942762 | 3.6206166 | -0.5275060 |

**Ac-(4R)Azp-OMe (3R-OMe) exo trans**

$\Psi = 43.5^\circ$ ,  $C^\delta-C^{\gamma}-N-N$  torsion =  $65.9^\circ$

|   |            |            |            |
|---|------------|------------|------------|
| H | -0.2478888 | 2.6550038  | 0.3928686  |
| C | -0.2495300 | 1.6684381  | 0.8522046  |
| C | -1.6484769 | 1.1572239  | 1.1488292  |
| C | -1.4270608 | -0.3441301 | 1.2857179  |
| N | -0.3818978 | -0.6055366 | 0.3141891  |
| C | 0.3465110  | 0.5899791  | -0.0609622 |
| H | 0.3100100  | 1.7112142  | 1.7890781  |
| H | -2.0712252 | 1.5947449  | 2.0564608  |
| H | -1.0991698 | -0.5777575 | 2.3047971  |
| H | -2.3281852 | -0.9232590 | 1.0781856  |
| C | -0.0781778 | -1.7881578 | -0.2604257 |
| H | 4.3831893  | 1.5311322  | -1.4271401 |
| H | 0.1881851  | 0.8189309  | -1.1170259 |
| C | 1.8335515  | 0.4330714  | 0.1894960  |
| H | 4.2529893  | 1.4646615  | 0.3568879  |
| O | 0.8179249  | -1.8614787 | -1.0932379 |
| C | -0.8869892 | -2.9788084 | 0.1695728  |
| H | -0.8925450 | -3.0823703 | 1.2568115  |
| H | -0.4588494 | -3.8711410 | -0.2807400 |
| H | -1.9241184 | -2.8754012 | -0.1606051 |
| O | 2.3023372  | -0.1129355 | 1.1544968  |
| O | 2.5464655  | 0.0376172  | -0.7518783 |
| C | 3.9657716  | 0.9898090  | -0.5819818 |
| H | 4.3090506  | -0.0451691 | -0.5839557 |
| N | -2.5024519 | 1.4903932  | -0.0092540 |
| N | -3.6569825 | 1.1063653  | 0.0585597  |
| N | -4.7384269 | 0.7943215  | 0.0271676  |

**Ac-(4R)Azp-OMe (3R-OMe) exo trans**

$\Psi = 145.1^\circ$ ,  $C^\delta-C^{\gamma}-N-N$  torsion =  $-31.6^\circ$

|   |            |            |            |
|---|------------|------------|------------|
| H | -0.0697263 | 2.7747076  | 0.4095075  |
| C | -0.1110536 | 1.7812184  | 0.8515428  |
| C | -1.5387118 | 1.3182414  | 1.1361522  |
| C | -1.3836794 | -0.1932083 | 1.2209094  |
| N | -0.3557811 | -0.4664879 | 0.2313807  |
| C | 0.4546909  | 0.6954473  | -0.0740455 |
| H | 0.4427675  | 1.7916694  | 1.7935394  |
| H | -1.9224389 | 1.7421401  | 2.0616881  |
| H | -1.0580250 | -0.4755838 | 2.2275330  |
| H | -2.3111911 | -0.7224959 | 0.9998846  |
| C | -0.1115383 | -1.6389614 | -0.3959753 |
| H | 4.5872161  | 1.5013858  | -1.2183809 |
| H | 0.3582415  | 0.9617746  | -1.1295314 |
| C | 1.9197537  | 0.4430695  | 0.2253614  |
| H | 4.3775057  | 1.3373157  | 0.5517737  |
| O | 0.7931892  | -1.7231800 | -1.2166925 |
| C | -1.0009698 | -2.7955541 | -0.0418573 |
| H | -1.0250452 | -2.9607383 | 1.0374243  |
| H | -0.6278124 | -3.6868210 | -0.5404290 |
| H | -2.0253203 | -2.6038058 | -0.3730146 |
| O | 2.3166696  | -0.1858402 | 1.1715722  |
| O | 2.7012961  | 1.0639456  | -0.6478903 |
| C | 4.1083892  | 0.9334754  | -0.4248706 |
| H | 4.4003760  | -0.1158172 | -0.4760925 |
| N | -2.4827609 | 1.7666155  | 0.0961835  |
| N | -2.5906280 | 1.0958571  | -0.9149111 |
| N | -2.7877536 | 0.5544565  | -1.8836442 |

**Ac-(4R)Azp-OMe (3R-OMe) exo trans**

$\Psi = -34.9^\circ$ ,  $C^\delta-C^{\gamma}-N-N$  torsion =  $-178.3^\circ$

|   |            |            |            |
|---|------------|------------|------------|
| H | -0.2450592 | 2.6922417  | 0.4404624  |
| C | -0.2798757 | 1.7034452  | 0.8966857  |
| C | -1.6948039 | 1.1869576  | 1.1370106  |
| C | -1.4819850 | -0.3083246 | 1.2760854  |
| N | -0.3935675 | -0.5702982 | 0.3503505  |
| C | 0.3525276  | 0.6243531  | 0.0083273  |
| H | 0.2372869  | 1.7542474  | 1.8579984  |
| H | -2.1535739 | 1.6206277  | 2.0289358  |
| H | -1.1988533 | -0.5502317 | 2.3059701  |
| H | -2.3790113 | -0.8690597 | 1.0162963  |
| C | -0.0727158 | -1.7528390 | -0.2148449 |

|   |            |            |            |
|---|------------|------------|------------|
| H | 3.5658222  | -0.9619026 | 2.5256899  |
| H | 0.2374935  | 0.8579075  | -1.0525220 |
| C | 1.8423423  | 0.5242932  | 0.2581677  |
| H | 4.0504365  | -0.7924847 | 0.8120693  |
| O | 0.8623949  | -1.8317754 | -1.0030847 |
| C | -0.9101740 | -2.9385470 | 0.1720642  |
| H | -0.9684219 | -3.0462312 | 1.2574142  |
| H | -0.4685039 | -3.8326219 | -0.2614975 |
| H | -1.9296487 | -2.8241523 | -0.2055589 |
| O | 2.6606684  | 1.1105304  | -0.4029451 |
| O | 2.1282264  | -0.2062153 | 1.3287687  |
| C | 3.5170924  | -0.3293885 | 1.6428228  |
| H | 3.9496902  | 0.6502188  | 1.8494504  |
| N | -2.5735792 | 1.4024032  | -0.0297362 |
| N | -2.8159023 | 2.5671093  | -0.2959165 |
| N | -3.1005716 | 3.6069125  | -0.6202565 |

**Ac-(4R)Azp-OMe (3R-OMe) exo trans**

$\Psi = -35.2^\circ$ ,  $C^\delta-C^{\gamma'}-N-N$  torsion =  $65.8^\circ$

|   |            |            |            |
|---|------------|------------|------------|
| H | -0.3161716 | 2.6885906  | 0.3954886  |
| C | -0.3219314 | 1.7120794  | 0.8753386  |
| C | -1.7230825 | 1.1788185  | 1.1169830  |
| C | -1.4806805 | -0.3151409 | 1.2946709  |
| N | -0.3838048 | -0.5762649 | 0.3811445  |
| C | 0.3336651  | 0.6280013  | 0.0093795  |
| H | 0.1918541  | 1.7879393  | 1.8360307  |
| H | -2.1968041 | 1.6254838  | 1.9944982  |
| H | -1.1998922 | -0.5230057 | 2.3333854  |
| H | -2.3600090 | -0.9152177 | 1.0556834  |
| C | -0.0357954 | -1.7657620 | -0.1535060 |
| H | 3.5849365  | -0.8225214 | 2.5588801  |
| H | 0.2080374  | 0.8565463  | -1.0556430 |
| C | 1.8258181  | 0.5654829  | 0.2564295  |
| H | 4.0611639  | -0.6918236 | 0.8395485  |
| O | 0.9021823  | -1.8442420 | -0.9377995 |
| C | -0.8486377 | -2.9593754 | 0.2613396  |
| H | -0.9118146 | -3.0391158 | 1.3487817  |
| H | -0.3840407 | -3.8545482 | -0.1451062 |
| H | -1.8679157 | -2.8800500 | -0.1261268 |
| O | 2.6305145  | 1.1493215  | -0.4231424 |
| O | 2.1293596  | -0.1288939 | 1.3462917  |
| C | 3.5212160  | -0.2160745 | 1.6588243  |
| H | 3.9351849  | 0.7771589  | 1.8365103  |
| N | -2.5265055 | 1.4719845  | -0.0868029 |
| N | -3.6749557 | 1.0648134  | -0.0668565 |
| N | -4.7469979 | 0.7293353  | -0.1439344 |

**Ac-(4R)Azp-OMe (3R-OMe) exo trans**

$\Psi = -34.3^\circ$ ,  $C^\delta-C^{\gamma'}-N-N$  torsion =  $-26.3^\circ$

|   |            |            |            |
|---|------------|------------|------------|
| H | -0.0865723 | 2.7884298  | 0.4246045  |
| C | -0.1580498 | 1.8000143  | 0.8735770  |
| C | -1.6003908 | 1.3454244  | 1.0839832  |
| C | -1.4552392 | -0.1644750 | 1.2004546  |
| N | -0.3742924 | -0.4566639 | 0.2742061  |
| C | 0.4468606  | 0.7036662  | -0.0145559 |
| H | 0.3450396  | 1.8188681  | 1.8435847  |
| H | -2.0358764 | 1.7853414  | 1.9789637  |
| H | -1.1879093 | -0.4310465 | 2.2284353  |
| H | -2.3703351 | -0.6967387 | 0.9381488  |
| C | -0.1044331 | -1.6408879 | -0.3201659 |
| H | 3.4729021  | -1.1266953 | 2.5664103  |
| H | 0.3872131  | 0.9605138  | -1.0752964 |
| C | 1.9192865  | 0.5169243  | 0.2849764  |
| H | 4.0327068  | -0.9319377 | 0.8785358  |
| O | 0.8438679  | -1.7458917 | -1.0870464 |
| C | -1.0200241 | -2.7862193 | 0.0037903  |
| H | -1.1116600 | -2.9296097 | 1.0825634  |
| H | -0.6225695 | -3.6890792 | -0.4534694 |
| H | -2.0211034 | -2.5968545 | -0.3934708 |
| O | 2.7909382  | 1.0774605  | -0.3279418 |
| O | 2.1246162  | -0.2600335 | 1.3409204  |
| C | 3.4920813  | -0.4663076 | 1.7030895  |
| H | 3.9661851  | 0.4824259  | 1.9570903  |
| N | -2.4731935 | 1.7828946  | -0.0218011 |
| N | -2.5923970 | 1.0503875  | -0.9872335 |
| N | -2.7906801 | 0.4516291  | -1.9213564 |

**Ac-(4R)Azp-NMe<sub>2</sub> (3R-NMe<sub>2</sub>) endo cis**

$\Psi = 165.5^\circ$ ,  $C^\delta-C^{\gamma'}-N-N$  torsion =  $88.9^\circ$

|   |            |            |            |
|---|------------|------------|------------|
| H | 1.6725535  | 1.4319309  | 0.2362574  |
| C | 1.4291756  | 0.6496752  | -0.4819469 |
| C | 1.3606873  | -0.7480751 | 0.1381372  |
| N | 0.4987714  | -1.4586420 | -0.7814795 |
| C | -0.2675481 | -0.5763398 | -1.6422540 |
| C | 0.0417215  | 0.8127813  | -1.0838521 |
| H | 2.1739911  | 0.6642542  | -1.2811357 |
| C | 0.7470025  | -0.6880369 | 1.5473896  |
| H | 2.3428204  | -1.2194256 | 0.1699957  |
| H | 1.0003806  | 0.8523551  | 4.2061475  |
| H | -1.3291907 | -0.8238824 | -1.6055115 |
| H | 0.0675033  | -0.6550833 | -2.6815180 |
| H | -0.6773187 | 1.0635215  | -0.2984983 |
| C | 0.3087812  | -2.7944972 | -0.8187314 |
| O | -0.4715698 | -3.2958681 | -1.6192448 |
| C | 1.1060830  | -3.6227185 | 0.1515009  |
| H | 0.8634381  | -4.6703669 | -0.0092888 |
| H | 0.8643576  | -3.3515428 | 1.1816270  |
| H | 2.1792515  | -3.4767057 | 0.0059917  |
| O | -0.4389023 | -0.9455684 | 1.7026761  |
| C | 1.0130988  | -0.1978957 | 3.8979153  |
| H | 1.6326735  | -0.7580920 | 4.6029642  |
| H | -0.0005720 | -0.5881597 | 3.9139752  |
| N | 0.0535279  | 1.8594685  | -2.1081109 |
| N | -1.0150715 | 2.4008683  | -2.3359306 |
| N | -1.9430626 | 2.9713451  | -2.6192929 |
| C | 2.9397784  | 0.0763152  | 2.4374043  |
| H | 3.0494494  | 1.1384851  | 2.6799811  |
| H | 3.5557660  | -0.4973423 | 3.1352687  |
| H | 3.3250804  | -0.0833068 | 1.4354649  |
| N | 1.5575943  | -0.3266153 | 2.5633065  |

**Ac-(4R)Azp-NMe<sub>2</sub> (3R-NMe<sub>2</sub>) endo cis**

$\Psi = 165.7^\circ$ ,  $C^\delta-C^{\gamma'}-N-N$  torsion =  $159.8^\circ$

|   |            |            |            |
|---|------------|------------|------------|
| H | 1.8213337  | 1.4328484  | 0.3710838  |
| C | 1.5511901  | 0.6889148  | -0.3783083 |
| C | 1.4090754  | -0.7247847 | 0.1925455  |
| N | 0.5272769  | -1.3609102 | -0.7621887 |
| C | -0.1848570 | -0.4147960 | -1.6017699 |
| C | 0.1733787  | 0.9321800  | -0.9918824 |
| H | 2.3057221  | 0.6948730  | -1.1682747 |
| C | 0.7817034  | -0.6849397 | 1.5963977  |
| H | 2.3677885  | -1.2426656 | 0.2186680  |
| H | 1.0778934  | 0.7506555  | 4.3107572  |
| H | -1.2564980 | -0.6147763 | -1.5911261 |
| H | 0.1633594  | -0.4703646 | -2.6381436 |
| H | -0.5446070 | 1.1837424  | -0.2056385 |
| C | 0.2760670  | -2.6842360 | -0.8488640 |
| O | -0.5145647 | -3.1208068 | -1.6767812 |
| C | 1.0190814  | -3.5819953 | 0.1024548  |
| H | 0.7309723  | -4.6109159 | -0.0990120 |
| H | 0.7737263  | -3.3359751 | 1.1380136  |
| H | 2.1000427  | -3.4813297 | -0.0224269 |
| O | -0.4162651 | -0.8934962 | 1.7305686  |
| C | 1.0422017  | -0.2873184 | 3.9650649  |
| H | 1.6245447  | -0.9024652 | 4.6559336  |
| H | 0.0103348  | -0.6267941 | 3.9564122  |
| N | 0.1654748  | 1.9677357  | -2.0276227 |
| N | 0.0552445  | 3.1152999  | -1.6320080 |
| N | -0.0461545 | 4.2070094  | -1.3758344 |
| C | 2.9969384  | -0.0545945 | 2.5350572  |
| H | 3.1537384  | 0.9920124  | 2.8162871  |
| H | 3.5767406  | -0.6808980 | 3.2185254  |
| H | 3.3863726  | -0.1974231 | 1.5321720  |
| N | 1.5958490  | -0.3953913 | 2.6323659  |

**Ac-(4R)Azp-NMe<sub>2</sub> (3R-NMe<sub>2</sub>) endo cis**

$\Psi = 165.7^\circ$ ,  $C^\delta-C^{\gamma'}-N-N$  torsion =  $-60.5^\circ$

|   |            |            |            |
|---|------------|------------|------------|
| H | 1.7108302  | 1.4912439  | 0.3377474  |
| C | 1.4665880  | 0.7372588  | -0.4095256 |
| C | 1.3765431  | -0.6811538 | 0.1587970  |
| N | 0.5141357  | -1.3489193 | -0.7922702 |
| C | -0.2515142 | -0.4313321 | -1.6149408 |
| C | 0.0779955  | 0.9349577  | -1.0137559 |
| H | 2.2282897  | 0.7643395  | -1.1938366 |

|   |            |            |            |
|---|------------|------------|------------|
| C | 0.7524398  | -0.6656026 | 1.5648376  |
| H | 2.3526559  | -1.1654309 | 0.1811002  |
| H | 1.0036158  | 0.7781071  | 4.2797342  |
| H | -1.3159006 | -0.6636877 | -1.5744796 |
| H | 0.0675075  | -0.4965659 | -2.6613778 |
| H | -0.6348064 | 1.1639264  | -0.2228396 |
| C | 0.3149993  | -2.6816042 | -0.8810518 |
| O | -0.4678463 | -3.1453082 | -1.7010864 |
| C | 1.1062493  | -3.5521156 | 0.0562893  |
| H | 0.8530235  | -4.5907727 | -0.1420331 |
| H | 0.8700111  | -3.3165468 | 1.0964049  |
| H | 2.1804044  | -3.4113031 | -0.0871793 |
| O | -0.4362803 | -0.9200103 | 1.7013714  |
| C | 1.0045874  | -0.2600739 | 3.9329322  |
| H | 1.6107573  | -0.8545832 | 4.6213577  |
| H | -0.0143165 | -0.6367216 | 3.9266394  |
| N | -0.0347293 | 2.0578077  | -1.9479229 |
| N | 0.6894745  | 2.0202240  | -2.9289850 |
| N | 1.3115427  | 2.0873377  | -3.8652758 |
| C | 2.9448732  | 0.0473963  | 2.4969414  |
| H | 3.3373910  | -0.0840336 | 1.4936811  |
| H | 3.0624382  | 1.1001088  | 2.7744541  |
| H | 3.5494631  | -0.5543142 | 3.1809731  |
| N | 1.5580383  | -0.3463607 | 2.5985276  |

**Ac-(4R)Azp-NMe<sub>2</sub> (3R-NMe<sub>2</sub>) endo cis**

**Ψ = -14.1°, C<sup>δ</sup>-C<sup>γ</sup>-N-N torsion = 162.9°**

|   |            |            |            |
|---|------------|------------|------------|
| H | 1.5268802  | 1.2581279  | 0.7859491  |
| C | 1.5026619  | 0.6014191  | -0.0824539 |
| C | 1.2710722  | -0.8637646 | 0.2965046  |
| N | 0.6463575  | -1.4134425 | -0.8922593 |
| C | 0.2218913  | -0.3964036 | -1.8390827 |
| C | 0.3601512  | 0.8975326  | -1.0496757 |
| H | 2.4502063  | 0.6938706  | -0.6174843 |
| C | 0.5824762  | -0.9967055 | 1.6647363  |
| H | 2.2323105  | -1.3485801 | 0.4772068  |
| H | -0.3549553 | -1.7513009 | 3.8318957  |
| H | -0.7950862 | -0.5818240 | -2.1892706 |
| H | 0.8781978  | -0.3805033 | -2.7147112 |
| H | -0.5600883 | 1.1018120  | -0.4912270 |
| C | 0.5585656  | -2.7244303 | -1.2103220 |
| O | 0.0650308  | -3.0786969 | -2.2737193 |
| C | 1.0900952  | -3.7046776 | -0.2017199 |
| H | 0.8735712  | -4.7113965 | -0.5505370 |
| H | 0.6402581  | -3.5554799 | 0.7824114  |
| H | 2.1712653  | -3.5893662 | -0.0889356 |
| O | 1.3144163  | -0.7822250 | 2.6264693  |
| C | -1.1947460 | -1.6146106 | 3.1565627  |
| H | -1.8078189 | -2.5184652 | 3.1438280  |
| H | -1.8074867 | -0.7817150 | 3.5144133  |
| N | 0.6260032  | 2.0046682  | -1.9693035 |
| N | 0.4387378  | 3.1239263  | -1.5222557 |
| N | 0.2932783  | 4.1965596  | -1.2142312 |
| C | -1.7185248 | -1.4736222 | 0.7817148  |
| H | -1.5344381 | -0.8113142 | -0.0558411 |
| H | -1.8068089 | -2.4993585 | 0.4114947  |
| H | -2.6768919 | -1.1866333 | 1.2169705  |
| N | -0.7072180 | -1.3554655 | 1.8145854  |

**Ac-(4R)Azp-NMe<sub>2</sub> (3R-NMe<sub>2</sub>) endo cis**

**Ψ = -14.2°, C<sup>δ</sup>-C<sup>γ</sup>-N-N torsion = -61.6°**

|   |            |            |            |
|---|------------|------------|------------|
| H | 1.3422963  | 1.3699426  | 0.6342111  |
| C | 1.3363699  | 0.6870325  | -0.2132005 |
| C | 1.1987743  | -0.7776398 | 0.2096496  |
| N | 0.5696885  | -1.3969664 | -0.9425698 |
| C | 0.0547532  | -0.4366538 | -1.9023275 |
| C | 0.1543066  | 0.8936748  | -1.1547230 |
| H | 2.2727150  | 0.8117917  | -0.7634955 |
| C | 0.5615145  | -0.9105964 | 1.6027760  |
| H | 2.1903967  | -1.2041216 | 0.3721229  |
| H | -0.2623092 | -1.6672659 | 3.8153498  |
| H | -0.9647546 | -0.6830274 | -2.2040592 |
| H | 0.6722966  | -0.4330871 | -2.8073849 |
| H | -0.7529460 | 1.0641288  | -0.5744689 |
| C | 0.5505688  | -2.7201762 | -1.2223436 |
| O | 0.0465624  | -3.1319273 | -2.2594899 |
| C | 1.1705760  | -3.6381699 | -0.2060716 |

|   |            |            |            |
|---|------------|------------|------------|
| H | 1.0027002  | -4.6653913 | -0.5201504 |
| H | 0.7442350  | -3.4867178 | 0.7881095  |
| H | 2.2461297  | -3.4571483 | -0.1328706 |
| O | 1.3097132  | -0.6297358 | 2.5342475  |
| C | -1.1295414 | -1.5905881 | 3.1656725  |
| H | -1.6936756 | -2.5254024 | 3.1928666  |
| H | -1.7737389 | -0.7828211 | 3.5257888  |
| N | 0.2428927  | 2.0688596  | -2.0235720 |
| N | 1.2127552  | 2.1226938  | -2.7628225 |
| N | 2.0647091  | 2.2745943  | -3.4826820 |
| C | -1.7351444 | -1.5351780 | 0.8062656  |
| H | -1.6171320 | -0.8803209 | -0.0488548 |
| H | -1.7759702 | -2.5715984 | 0.4582906  |
| H | -2.6940615 | -1.2944716 | 1.2674702  |
| N | -0.6999594 | -1.3379049 | 1.8027801  |

**Ac-(4R)Azp-NMe<sub>2</sub> (3R-NMe<sub>2</sub>) endo cis**

**Ψ = -14.5°, C<sup>δ</sup>-C<sup>γ</sup>-N-N torsion = 89.2°**

|   |            |            |            |
|---|------------|------------|------------|
| H | 1.3465999  | 1.3248882  | 0.6087357  |
| C | 1.3329459  | 0.6296752  | -0.2268879 |
| C | 1.2012132  | -0.8283353 | 0.2176419  |
| N | 0.5665331  | -1.4648522 | -0.9215756 |
| C | 0.0556603  | -0.5154083 | -1.8952988 |
| C | 0.1508200  | 0.8242478  | -1.1636272 |
| H | 2.2558112  | 0.7547911  | -0.7991246 |
| C | 0.5703769  | -0.9421158 | 1.6152728  |
| H | 2.1946907  | -1.2500422 | 0.3812525  |
| H | -0.2478065 | -1.6614554 | 3.8423606  |
| H | -0.9612314 | -0.7713940 | -2.1999081 |
| H | 0.6809819  | -0.5045736 | -2.7934523 |
| H | -0.7600396 | 1.0074160  | -0.5837025 |
| C | 0.5425089  | -2.7916994 | -1.1803573 |
| O | 0.0336565  | -3.2193726 | -2.2090063 |
| C | 1.1628798  | -3.6953303 | -0.1512502 |
| H | 0.9946611  | -4.7269573 | -0.4503612 |
| H | 0.7365941  | -3.5294999 | 0.8406801  |
| H | 2.2384085  | -3.5133162 | -0.0804797 |
| O | 1.3233777  | -0.6522019 | 2.5401219  |
| C | -1.1172987 | -1.5929589 | 3.1948053  |
| H | -1.6828916 | -2.5263361 | 3.2379879  |
| H | -1.7589744 | -0.7789728 | 3.5453767  |
| N | 0.3903850  | 1.9515754  | -2.0660699 |
| N | -0.6018572 | 2.4942651  | -2.5225555 |
| N | -1.4455110 | 3.0723581  | -2.9923576 |
| C | -1.7322620 | -1.5703281 | 0.8379279  |
| H | -1.6125575 | -0.9327876 | -0.0299391 |
| H | -1.7805855 | -2.6128636 | 0.5095899  |
| H | -2.6882096 | -1.3150305 | 1.2976429  |
| N | -0.6923692 | -1.3610090 | 1.8268520  |

**Ac-(4R)Azp-NMe<sub>2</sub> (3R-NMe<sub>2</sub>) endo trans**

**Ψ = 131.5°, C<sup>δ</sup>-C<sup>γ</sup>-N-N torsion = 157.8°**

|   |            |            |            |
|---|------------|------------|------------|
| H | 1.1254553  | 1.8704580  | 0.0129557  |
| C | 1.0740548  | 1.0217356  | -0.6690665 |
| C | 1.2715466  | -0.3221833 | 0.0344354  |
| N | 0.5136253  | -1.2413753 | -0.8002643 |
| C | -0.3161583 | -0.5761639 | -1.7862600 |
| C | -0.2935001 | 0.8782034  | -1.3353457 |
| H | 1.8374600  | 1.1461818  | -1.4407135 |
| C | 0.6812844  | -0.2784424 | 1.4458312  |
| H | 2.3177728  | -0.6174556 | 0.0402538  |
| H | 0.0103216  | 0.1572755  | 3.7945201  |
| H | -1.3283672 | -0.9813569 | -1.8034402 |
| H | 0.1111312  | -0.6585387 | -2.7922186 |
| H | -1.0820711 | 1.0470590  | -0.5994723 |
| C | 0.6063120  | -2.5682874 | -0.5911892 |
| O | 1.3301886  | -3.0143019 | 0.2950546  |
| C | -0.2158533 | -3.4522033 | -1.4852665 |
| H | 0.0572020  | -4.4885183 | -1.3007249 |
| H | -0.0604326 | -3.2111915 | -2.5390574 |
| H | -1.2792796 | -3.3188780 | -1.2690586 |
| O | -0.5226244 | -0.0720587 | 1.5745948  |
| C | 1.0133369  | -0.2593496 | 3.8328119  |
| H | 1.6640195  | 0.4075729  | 4.4031121  |
| H | 0.9763254  | -1.2291070 | 4.3388075  |
| N | -0.4766927 | 1.7529300  | -2.4977314 |
| N | -0.8927591 | 2.8735846  | -2.2608346 |

|   |            |            |            |
|---|------------|------------|------------|
| N | -1.2757991 | 3.9270152  | -2.1543490 |
| C | 2.9103978  | -0.8147928 | 2.3544244  |
| H | 3.5428189  | -0.0103858 | 1.9690885  |
| H | 3.2779205  | -1.0839147 | 3.3435801  |
| H | 2.9948570  | -1.6929308 | 1.7132661  |
| N | 1.5228692  | -0.4041868 | 2.4857559  |

**Ac-(4R)Azp-NMe<sub>2</sub> (3R-NMe<sub>2</sub>) endo trans**

**Ψ =132.6°, C<sup>δ</sup>-C<sup>γ</sup>-N-N torsion =-62.3°**

|   |            |            |            |
|---|------------|------------|------------|
| H | 1.3548242  | 1.9384745  | 0.2022917  |
| C | 1.2605537  | 1.1318495  | -0.5239010 |
| C | 1.3526965  | -0.2583432 | 0.1072654  |
| N | 0.5479271  | -1.0796880 | -0.7837565 |
| C | -0.2274502 | -0.3121328 | -1.7378272 |
| C | -0.1022271 | 1.1198631  | -1.2126390 |
| H | 2.0566032  | 1.2401128  | -1.2661929 |
| C | 0.7426552  | -0.2492434 | 1.5110650  |
| H | 2.3755586  | -0.6262780 | 0.1113908  |
| H | 0.0547190  | 0.0983200  | 3.8692825  |
| H | -1.2670142 | -0.6388361 | -1.7748435 |
| H | 0.1964657  | -0.3934970 | -2.7465804 |
| H | -0.8814420 | 1.3015017  | -0.4767895 |
| C | 0.5426401  | -2.4187756 | -0.6346211 |
| O | 1.2204703  | -2.9536415 | 0.2381493  |
| C | -0.3273450 | -3.1999562 | -1.5773527 |
| H | -0.1297398 | -4.2604126 | -1.4397214 |
| H | -0.1421179 | -2.9216890 | -2.6170759 |
| H | -1.3814915 | -3.0023474 | -1.3648312 |
| O | -0.4514832 | 0.0097337  | 1.6326067  |
| C | 1.0375255  | -0.3645194 | 3.9002257  |
| H | 1.7075859  | 0.2426562  | 4.5131637  |
| H | 0.9492289  | -1.3561116 | 4.3549639  |
| N | -0.2931450 | 2.1517948  | -2.2364486 |
| N | 0.5090352  | 2.1613814  | -3.1549881 |
| N | 1.1923558  | 2.2609825  | -4.0449947 |
| C | 2.9289796  | -0.9364031 | 2.4196254  |
| H | 2.9761400  | -1.8036988 | 1.7595460  |
| H | 3.6002584  | -0.1549411 | 2.0538166  |
| H | 3.2791482  | -1.2427073 | 3.4041092  |
| N | 1.5616567  | -0.4636233 | 2.5545811  |

**Ac-(4R)Azp-NMe<sub>2</sub> (3R-NMe<sub>2</sub>) endo trans**

**Ψ =-16.8°, C<sup>δ</sup>-C<sup>γ</sup>-N-N torsion =-63.3°**

|   |            |            |            |
|---|------------|------------|------------|
| H | 1.2841115  | 1.3725833  | 0.5830950  |
| C | 1.2556919  | 0.6977253  | -0.2702476 |
| C | 1.1454487  | -0.7719753 | 0.1414533  |
| N | 0.4516438  | -1.3832305 | -0.9789652 |
| C | -0.0667549 | -0.4168048 | -1.9292480 |
| C | 0.0377436  | 0.9041360  | -1.1636478 |
| H | 2.1700451  | 0.8406938  | -0.8524242 |
| C | 0.5954842  | -0.9273209 | 1.5661940  |
| H | 2.1351845  | -1.2220115 | 0.2336182  |
| H | -1.4622623 | -2.5764449 | 3.3019899  |
| H | -1.0939421 | -0.6397542 | -2.2248891 |
| H | 0.5478732  | -0.3831945 | -2.8368378 |
| H | -0.8512721 | 1.0443679  | -0.5481773 |
| C | 0.4650086  | -2.7254534 | -1.1444709 |
| O | 0.9708574  | -3.4561104 | -0.3025190 |
| C | -0.1869020 | -3.2518844 | -2.3913368 |
| H | -0.0542256 | -4.3304422 | -2.4268760 |
| H | 0.2465588  | -2.7990428 | -3.2861068 |
| H | -1.2556045 | -3.0204823 | -2.3916647 |
| O | 1.4023845  | -0.6576979 | 2.4514193  |
| C | -1.0164258 | -1.5813675 | 3.2245513  |
| H | -1.7425455 | -0.8448992 | 3.5810775  |
| H | -0.1255096 | -1.5330081 | 3.8434951  |
| N | 0.0688394  | 2.0908101  | -2.0197688 |
| N | 1.0231726  | 2.1887709  | -2.7747484 |
| N | 1.8556405  | 2.3805776  | -3.5077234 |
| C | -1.7325988 | -1.5771589 | 0.9002509  |
| H | -1.6985407 | -0.9130210 | 0.0433067  |
| H | -1.7269495 | -2.6153591 | 0.5548761  |
| H | -2.6790417 | -1.3944266 | 1.4107866  |
| N | -0.6632816 | -1.3192094 | 1.8423434  |

**Ac-(4R)Azp-NMe<sub>2</sub> (3R-NMe<sub>2</sub>) endo trans**

**Ψ =-17.1°, C<sup>δ</sup>-C<sup>γ</sup>-N-N torsion =-92.8°**

|   |            |            |            |
|---|------------|------------|------------|
| H | 1.2886851  | 1.3320568  | 0.5490382  |
| C | 1.2547019  | 0.6428363  | -0.2927011 |
| C | 1.1470426  | -0.8192930 | 0.1449290  |
| N | 0.4507273  | -1.4483977 | -0.9634034 |
| C | -0.0606399 | -0.4940584 | -1.9307595 |
| C | 0.0399322  | 0.8380402  | -1.1844492 |
| H | 2.1570227  | 0.7835269  | -0.8918315 |
| C | 0.5991002  | -0.9521331 | 1.5725444  |
| H | 2.1374258  | -1.2667574 | 0.2425035  |
| H | -1.4616807 | -2.5652661 | 3.3371379  |
| H | -1.0853007 | -0.7254494 | -2.2307927 |
| H | 0.5623705  | -0.4572768 | -2.8309968 |
| H | -0.8540423 | 0.9956881  | -0.5720587 |
| C | 0.4612528  | -2.7924819 | -1.1077593 |
| O | 0.9647819  | -0.5118191 | -3.513065  |
| C | -0.1916271 | -3.3370908 | -2.3465061 |
| H | -0.0579204 | -4.4159343 | -2.3670872 |
| H | 0.2397608  | -2.8959816 | -3.2480562 |
| H | -1.2606845 | -3.1071486 | -2.3482478 |
| O | 1.4079742  | -0.6733303 | 2.4531621  |
| C | -1.0145034 | -1.5721928 | 3.2428444  |
| H | -1.7395528 | -0.8290079 | 3.5874822  |
| H | -0.1232311 | -1.5147706 | 3.8604946  |
| N | 0.2280438  | 1.9754467  | -2.0857799 |
| N | -0.7859146 | 2.5489163  | -2.4467556 |
| N | -1.6527869 | 3.1539113  | -2.8329809 |
| C | -1.7325635 | -1.6032706 | 0.9197454  |
| H | -1.6952209 | -0.9552446 | 0.0506348  |
| H | -1.7319012 | -2.6475847 | 0.5931865  |
| H | -2.6780161 | -1.4067561 | 1.4271121  |
| N | -0.6616140 | -1.3332433 | 1.8564430  |

**Ac-(4R)Azp-OMe (3R-OMe) endo cis**

**Ψ =163.8°, C<sup>δ</sup>-C<sup>γ</sup>-N-N torsion = 88.9°**

|   |            |            |            |
|---|------------|------------|------------|
| H | 1.6579514  | 1.3748821  | 0.4561623  |
| C | 1.4429824  | 0.6296553  | -0.3084769 |
| C | 1.3177986  | -0.7897948 | 0.2520445  |
| N | 0.4848233  | -1.4529871 | -0.7251944 |
| C | -0.1834595 | -0.5283283 | -1.6247063 |
| C | 0.1028823  | 0.8363284  | -0.9977460 |
| H | 2.2399125  | 0.6547419  | -1.0546756 |
| C | 0.6760590  | -0.7548835 | 1.6323592  |
| H | 2.2979291  | -1.2603292 | 0.3448196  |
| H | 0.3567418  | 0.4656490  | 3.9525107  |
| H | -1.2481262 | -0.7540504 | -1.6918164 |
| H | 0.2435245  | -0.5839020 | -2.6312140 |
| H | -0.6669810 | 1.0729656  | -0.2568257 |
| C | 0.2889838  | -2.7867003 | -0.8314710 |
| O | -0.4360175 | -3.2450723 | -1.7045518 |
| C | 1.0052133  | -3.6601181 | 0.1616932  |
| H | 0.7681175  | -4.6980579 | -0.0586874 |
| H | 0.6888179  | -3.4310453 | -1.821064  |
| H | 2.0870511  | -3.5182994 | 0.1046812  |
| O | -0.4922617 | -0.9336226 | 1.8568747  |
| O | 1.5840610  | -0.4657368 | 2.5569557  |
| C | 1.0948600  | -0.3349382 | 3.8966010  |
| H | 1.9630197  | -0.0974763 | 4.5057560  |
| H | 0.6406654  | -1.2700318 | 4.2252988  |
| N | 0.2008415  | 1.9148945  | -1.9822176 |
| N | -0.8419984 | 2.4802647  | -2.2658835 |
| N | -1.7395475 | 3.0744186  | -2.5942199 |

**Ac-(4R)Azp-OMe (3R-OMe) endo cis**

**Ψ =164.3°, C<sup>δ</sup>-C<sup>γ</sup>-N-N torsion = 159.9°**

|   |            |            |            |
|---|------------|------------|------------|
| H | 1.8420802  | 1.3363631  | 0.6134006  |
| C | 1.5981389  | 0.6361192  | -0.1849957 |
| C | 1.3739224  | -0.7931266 | 0.3184067  |
| N | 0.5248818  | -1.3654653 | -0.7014497 |
| C | -0.0677529 | -0.3683240 | -1.5764657 |
| C | 0.2807516  | 0.9459537  | -0.8935082 |
| H | 2.4102026  | 0.6385406  | -0.9149746 |
| C | 0.7062706  | -0.7720894 | 1.6865939  |
| H | 2.3215715  | -1.3261506 | 0.4119177  |
| H | 0.4050961  | 0.3806359  | 4.0442832  |
| H | -1.1415717 | -0.5265632 | -1.6750041 |
| H | 0.3774379  | -0.4092246 | -2.5756972 |
| H | -0.4900882 | 1.1969663  | -0.1581251 |

|   |            |            |            |
|---|------------|------------|------------|
| C | 0.2534594  | -2.6797511 | -0.8661993 |
| O | -0.4764190 | -3.0591945 | -1.7724499 |
| C | 0.8931368  | -3.6332578 | 0.1053556  |
| H | 0.5989193  | -4.6453463 | -0.1615012 |
| H | 0.5681624  | -3.4252089 | 1.1275554  |
| H | 1.9825993  | -3.5559348 | 0.0758422  |
| O | -0.4739058 | -0.8972335 | 1.8832647  |
| O | 1.6094776  | -0.5635741 | 2.6373910  |
| C | 1.1012482  | -0.4554476 | 3.9719658  |
| H | 1.9683755  | -0.2864892 | 4.6049751  |
| H | 0.5922834  | -1.3763954 | 4.2575583  |
| N | 0.3856517  | 2.0116806  | -1.8913082 |
| N | 0.2802712  | 3.1501664  | -1.4677467 |
| N | 0.1924964  | 4.2363360  | -1.1856896 |

**Ac-(4R)Azp-OMe (3R-OMe) endo cis**

$\Psi = 164.5^\circ$ ,  $C^{\delta}-C^{\gamma}-N-N$  torsion =  $-60.5^\circ$

|   |            |            |            |
|---|------------|------------|------------|
| H | 1.7060745  | 1.4176639  | 0.5500131  |
| C | 1.4834436  | 0.7023212  | -0.2402888 |
| C | 1.3294822  | -0.7330845 | 0.2702360  |
| N | 0.4909455  | -1.3485810 | -0.7333538 |
| C | -0.1743818 | -0.3853906 | -1.5927583 |
| C | 0.1422521  | 0.9532609  | -0.9258413 |
| H | 2.2938227  | 0.7305282  | -0.9733812 |
| C | 0.6813161  | -0.7355823 | 1.6482586  |
| H | 2.3003403  | -1.2245309 | 0.3517011  |
| H | 0.3576006  | 0.4137659  | 4.0040413  |
| H | -1.2439485 | -0.5864162 | -1.6513680 |
| H | 0.2331807  | -0.4325479 | -2.6089669 |
| H | -0.6173392 | 1.1746657  | -0.1767817 |
| C | 0.2813758  | -2.6755766 | -0.8915015 |
| O | -0.4486195 | -3.0906980 | -1.7814726 |
| C | 0.9897925  | -3.5946587 | 0.0650862  |
| H | 0.7357809  | -4.6202722 | -0.1911786 |
| C | 0.6835103  | -3.3979110 | 1.0952555  |
| H | 2.0732979  | -3.4670549 | 0.0055233  |
| O | -0.4885550 | -0.9167596 | 1.8616223  |
| O | 1.5866358  | -0.4784197 | 2.5846163  |
| C | 1.0928107  | -0.3876194 | 3.9260091  |
| H | 1.9595997  | -0.1727392 | 4.5453872  |
| H | 0.6338580  | -1.3307928 | 4.2235151  |
| N | 0.1139656  | 2.1062495  | -1.8275867 |
| N | 0.9013207  | 2.0839222  | -2.7598488 |
| N | 1.5844916  | 2.1681156  | -3.6507404 |

**Ac-(4R)Azp-OMe (3R-OMe) endo cis**

$\Psi = -19.8^\circ$ ,  $C^{\delta}-C^{\gamma}-N-N$  torsion =  $160.1^\circ$

|   |            |            |            |
|---|------------|------------|------------|
| H | 1.7667374  | 1.2061478  | 0.7589179  |
| C | 1.5606467  | 0.5523932  | -0.0880163 |
| C | 1.3521955  | -0.9084084 | 0.3222662  |
| N | 0.5471255  | -1.4337417 | -0.7594481 |
| C | -0.0434417 | -0.3967878 | -1.5884891 |
| C | 0.2617676  | 0.8818859  | -0.8212755 |
| H | 2.3951457  | 0.6124513  | -0.7897908 |
| C | 0.7097203  | -0.9795586 | 1.7006647  |
| H | 2.3084344  | -1.4261276 | 0.4100692  |
| H | -0.9178093 | -1.9897270 | 3.5146296  |
| H | -1.1112718 | -0.5682849 | -1.7248518 |
| H | 0.4269180  | -0.3704895 | -2.5764080 |
| H | -0.5364720 | 1.0812559  | -0.0994244 |
| C | 0.3096884  | -2.7404727 | -1.0106015 |
| O | -0.3908568 | -3.0800370 | -1.9552595 |
| C | 0.9487119  | -3.7368167 | -0.0824698 |
| H | 0.6681845  | -4.7367423 | -0.4041935 |
| H | 0.6163376  | -3.5879091 | 0.9478508  |
| H | 2.0374540  | -3.6462287 | -0.0969134 |
| O | 1.3507844  | -0.8847861 | 2.7162466  |
| O | -0.6078632 | -1.1157274 | 1.6550734  |
| C | -1.2780148 | -1.1496844 | 2.9202758  |
| H | -2.3334037 | -1.2690327 | 2.6903951  |
| H | -1.1049051 | -0.2207348 | 3.4640270  |
| N | 0.3798712  | 2.0029554  | -1.7549167 |
| N | 0.2475980  | 3.1145969  | -1.2713971 |
| N | 0.1369741  | 4.1819203  | -0.9316556 |

**Ac-(4R)Azp-OMe (3R-OMe) endo cis**

$\Psi = -20.0^\circ$ ,  $C^{\delta}-C^{\gamma}-N-N$  torsion =  $-60.7^\circ$

|   |            |            |            |
|---|------------|------------|------------|
| H | 1.6193148  | 1.3033503  | 0.6746262  |
| C | 1.4333802  | 0.6281089  | -0.1591992 |
| C | 1.3021212  | -0.8355974 | 0.2703763  |
| N | 0.5044433  | -1.4144884 | -0.7896313 |
| C | -0.1648788 | -0.4216900 | -1.6114889 |
| C | 0.1071493  | 0.8878776  | -0.8700416 |
| H | 2.2626236  | 0.7124009  | -0.8665260 |
| C | 0.6867632  | -0.9198278 | 1.6606899  |
| H | 2.2828348  | -1.3069254 | 0.3474763  |
| H | -0.8639713 | -1.9833725 | 3.5110886  |
| H | -1.2283524 | -0.6421964 | -1.7045362 |
| H | 0.2641352  | -0.4073540 | -2.6196050 |
| H | -0.6774578 | 1.0592307  | -0.1338762 |
| C | 0.3314308  | -2.7352493 | -1.0228326 |
| O | -0.3717861 | -3.1201638 | -1.9475306 |
| C | 1.0449803  | -3.6861480 | -0.1017198 |
| H | 0.8063990  | -4.7029325 | -0.4038059 |
| H | 0.7349738  | -3.5406574 | 0.9360352  |
| H | 2.1269305  | -3.5412431 | -0.1487770 |
| O | 1.3395278  | -0.7845802 | 2.6640084  |
| O | -0.6235522 | -1.1165922 | 1.6379708  |
| C | -1.2716077 | -1.1671161 | 2.9142426  |
| H | -2.3238825 | -1.3368926 | 2.7026389  |
| H | -1.1325248 | -0.2252770 | 3.4453845  |
| N | 0.0803263  | 2.0831165  | -1.7151068 |
| N | 0.8948255  | 2.1218779  | -2.6234003 |
| N | 1.6014673  | 2.2625235  | -3.4883535 |

**Ac-(4R)Azp-OMe (3R-OMe) endo cis**

$\Psi = -20.7^\circ$ ,  $C^{\delta}-C^{\gamma}-N-N$  torsion =  $89.1^\circ$

|   |            |            |            |
|---|------------|------------|------------|
| H | 1.5712573  | 1.2782502  | 0.5854129  |
| C | 1.3970214  | 0.5717194  | -0.2249014 |
| C | 1.2918509  | -0.8781444 | 0.2557046  |
| N | 0.5042382  | -1.5064893 | -0.7831861 |
| C | -0.1627451 | -0.5505162 | -1.6503942 |
| C | 0.0761240  | 0.7867279  | -0.9478852 |
| H | 2.2163064  | 0.6539033  | -0.9423231 |
| C | 0.6775020  | -0.9252054 | 1.6479733  |
| H | 2.2809959  | -1.3285309 | 0.3487673  |
| H | -0.8660349 | -1.9395874 | -3.5313633 |
| H | -1.2200972 | -0.7952875 | -1.7575257 |
| H | 0.2900822  | -0.5450091 | -2.6468715 |
| H | -0.7224070 | 0.9741317  | -0.2235223 |
| C | 0.3458811  | -2.8364648 | -0.9660271 |
| O | -0.3469239 | -3.2652368 | -1.8796193 |
| C | 1.0612716  | -3.7434812 | -0.0027607 |
| H | 0.8412297  | -4.7738486 | -0.2710343 |
| H | 0.7349931  | -3.5657325 | -1.0249556 |
| H | 2.1415349  | -3.5842914 | -0.0405366 |
| O | 1.3289169  | -0.7559758 | 2.6470852  |
| O | -0.6320475 | -1.1299122 | 1.6320125  |
| C | -1.2791835 | -1.1450643 | 2.9094798  |
| H | -2.3304310 | -1.3283976 | 2.7039851  |
| H | -1.1463264 | -0.1863272 | 3.4112237  |
| N | 0.1837964  | 1.9134033  | -1.8760276 |
| N | -0.8603409 | 2.4741625  | -2.1636351 |
| N | -1.7590606 | 3.0679547  | -2.4896262 |

**Ac-(4R)Azp-OMe (3R-OMe) endo trans**

$\Psi = 152.0^\circ$ ,  $C^{\delta}-C^{\gamma}-N-N$  torsion =  $93.3^\circ$

|   |            |            |            |
|---|------------|------------|------------|
| H | 1.5760002  | 1.4739995  | 0.4152445  |
| C | 1.4118053  | 0.7265985  | -0.3603622 |
| C | 1.3174169  | -0.6995759 | 0.1858028  |
| N | 0.4775894  | -1.3716793 | -0.7828673 |
| C | -0.1353763 | -0.4654635 | -1.7356639 |
| C | 0.0881317  | 0.9031090  | -1.0894754 |
| H | 2.2311150  | 0.7889676  | -1.0798586 |
| C | 0.6739303  | -0.7074404 | 1.5625644  |
| H | 2.2935963  | -1.1791430 | 0.1621265  |
| H | 0.4993375  | 0.2941843  | 3.9984298  |
| H | -1.1941538 | -0.6842131 | -1.8778636 |
| H | 0.3662095  | -0.5018182 | -2.7092672 |
| H | -0.7111283 | 1.1024211  | -0.3699264 |
| C | 0.2730524  | -2.7029009 | -0.6821201 |
| O | 0.8046785  | -3.3474485 | 0.2142088  |
| C | -0.6280281 | -3.3268165 | -1.7085514 |
| H | -0.5743040 | -4.4084374 | -1.6097735 |

|   |            |            |            |
|---|------------|------------|------------|
| H | -0.3472260 | -3.0328907 | -2.7220078 |
| H | -1.6600102 | -3.0053902 | -1.5432440 |
| O | -0.5133461 | -0.6919490 | 1.7627960  |
| O | 1.5959749  | -0.6668469 | 2.5162095  |
| C | 1.1032975  | -0.6029927 | 3.8581513  |
| H | 1.9836800  | -0.5739226 | 4.4949832  |
| H | 0.5002133  | -1.4838894 | 4.0796248  |
| N | 0.1774701  | 1.9873237  | -2.0681842 |
| N | -0.8623152 | 2.5733588  | -2.3184933 |
| N | -1.7586557 | 3.1848391  | -2.6171147 |

**Ac-(4R)Azp-OMe (3R-OMe) endo trans**

$\Psi = 152.4^\circ$ ,  $C^{\delta}-C^{\gamma}-N-N$  torsion =  $159.7^\circ$

|   |            |            |            |
|---|------------|------------|------------|
| H | 1.7753924  | 1.4096251  | 0.5747973  |
| C | 1.5764520  | 0.7035409  | -0.2314512 |
| C | 1.3719268  | -0.7307577 | 0.2623445  |
| N | 0.5101989  | -1.3082079 | -0.7470151 |
| C | -0.0222397 | -0.3293284 | -1.6762851 |
| C | 0.2772898  | 0.9918476  | -0.9816521 |
| H | 2.4128460  | 0.7319304  | -0.9330613 |
| C | 0.7004701  | -0.7420890 | 1.6255531  |
| H | 2.3112255  | -1.2790128 | 0.3390501  |
| H | 0.5397908  | 0.1884074  | 4.0903477  |
| H | -1.0898930 | -0.4698721 | -1.8450637 |
| H | 0.4940518  | -0.3653825 | -2.6422689 |
| H | -0.5221321 | 1.2201306  | -0.2704857 |
| C | 0.2166454  | -2.6255400 | -0.7023251 |
| O | 0.6852504  | -3.3375296 | 0.1781072  |
| C | -0.7009214 | -3.1491780 | -1.7694401 |
| H | -0.7201245 | -4.2349360 | -1.7120111 |
| H | -0.3798405 | -2.8363617 | -2.7651138 |
| H | -1.7129605 | -2.7665646 | -1.6113959 |
| O | -0.4872186 | -0.6577316 | 1.8044799  |
| C | 1.6038491  | -0.7912941 | 2.5966336  |
| O | 1.0892220  | -0.7400705 | 3.9308757  |
| H | 1.9567259  | -0.7873315 | 4.5840759  |
| H | 0.4279741  | -1.5878885 | 4.1116576  |
| N | 0.3898786  | 2.0579542  | -1.9779958 |
| N | 0.2446297  | 3.1945224  | -1.5607057 |
| N | 0.1233189  | 4.2786601  | -1.2839658 |

**Ac-(4R)Azp-OMe (3R-OMe) endo trans**

$\Psi = 152.5^\circ$ ,  $C^{\delta}-C^{\gamma}-N-N$  torsion =  $-62.4^\circ$

|   |            |            |            |
|---|------------|------------|------------|
| H | 1.6098137  | 1.5100112  | 0.4965679  |
| C | 1.4399335  | 0.7888455  | -0.3020898 |
| C | 1.3265839  | -0.6526939 | 0.1987692  |
| N | 0.4797008  | -1.2854323 | -0.7904638 |
| C | -0.1352079 | -0.3462472 | -1.7083607 |
| C | 0.1123095  | 1.0003264  | -1.0256629 |
| H | 2.2712725  | 0.8558393  | -1.0089628 |
| C | 0.6826015  | -0.6952282 | 1.5748686  |
| H | 2.2965947  | -1.1466303 | 0.2597104  |
| H | 0.5121796  | 0.2391847  | 4.0374493  |
| H | -1.1986850 | -0.5438726 | -1.8420364 |
| H | 0.3498382  | -0.3764951 | -2.6919176 |
| H | -0.6770819 | 1.1822578  | -0.2976377 |
| C | 0.2639782  | -2.6180678 | -0.7309854 |
| O | 0.7939246  | -3.2943875 | 0.1421723  |
| C | -0.6461874 | -3.2011657 | -1.7729523 |
| H | -0.6009071 | -4.2857960 | -1.7094465 |
| H | -0.3672241 | -2.8770497 | -2.7777015 |
| H | -1.6747235 | -2.8767341 | -1.5927837 |
| O | -0.5045116 | -0.6818422 | 1.7750434  |
| O | 1.6051979  | -0.6837793 | 2.5285940  |
| C | 1.1134634  | -0.6555120 | 3.8722426  |
| H | 1.9943581  | -0.6465143 | 4.5089422  |
| H | 0.5080769  | -1.5405271 | 4.0696174  |
| N | 0.0638118  | 2.1531539  | -1.9258232 |
| N | 0.8981756  | 2.1820601  | -2.8161381 |
| N | 1.6198786  | 2.3117116  | -3.6705270 |

**Ac-(4R)Azp-OMe (3R-OMe) endo trans**

$\Psi = -27.9^\circ$ ,  $C^{\delta}-C^{\gamma}-N-N$  torsion =  $160.6^\circ$

|   |           |            |            |
|---|-----------|------------|------------|
| H | 1.7166888 | 1.1613494  | 0.7606814  |
| C | 1.5367742 | 0.5358527  | -0.1133733 |
| C | 1.3400114 | -0.9411387 | 0.2386869  |
| N | 0.4900038 | -1.4252607 | -0.8302579 |

|   |            |            |            |
|---|------------|------------|------------|
| C | -0.0279400 | -0.3668954 | -1.6769557 |
| C | 0.2506325  | 0.8864111  | -0.8589203 |
| H | 2.3849102  | 0.6373176  | -0.7938163 |
| C | 0.7393512  | -1.1035089 | 1.6247988  |
| H | 2.2861167  | -1.4829123 | 0.2638111  |
| H | -0.9352728 | -2.1570721 | 3.3627404  |
| H | -1.0909364 | -0.4950491 | -1.8816583 |
| H | 0.5085386  | -0.3121038 | -2.6309709 |
| H | -0.5642361 | 1.0482567  | -0.1465878 |
| C | 0.2040436  | -2.7420426 | -0.9174156 |
| O | 0.6568799  | -3.5322826 | -0.0978322 |
| C | -0.6893987 | -3.1657872 | -2.0477293 |
| H | -0.7046210 | -4.2522030 | -2.0924724 |
| H | -0.3494020 | -2.7605619 | -3.0029870 |
| H | -1.7065659 | -2.8026366 | -1.8765829 |
| O | 1.4118396  | -1.1758849 | 2.6212918  |
| O | -0.5877117 | -1.0876275 | 1.6180919  |
| C | -1.2176154 | -1.2130492 | 2.8959278  |
| H | -2.2869217 | -1.1891323 | 2.7018144  |
| H | -0.9271340 | -0.3867765 | 3.5456367  |
| N | 0.3742128  | 2.0384247  | -1.7528156 |
| N | 0.2310854  | 3.1327661  | -1.2338523 |
| N | 0.1120349  | 4.1874140  | -0.8596572 |

**Ac-(4R)Azp-OMe (3R-OMe) endo trans**

$\Psi = -28.0^\circ$ ,  $C^{\delta}-C^{\gamma}-N-N$  torsion =  $-62.6^\circ$

|   |            |            |            |
|---|------------|------------|------------|
| H | 1.5607393  | 1.2748484  | 0.6707032  |
| C | 1.4036746  | 0.6293173  | -0.1923048 |
| C | 1.2980836  | -0.8526105 | 0.1763845  |
| N | 0.4553091  | -1.3984769 | -0.8690697 |
| C | -0.1461572 | -0.3843629 | -1.7131691 |
| C | 0.0852632  | 0.8987117  | -0.9182728 |
| H | 2.2426103  | 0.7649384  | -0.8800780 |
| C | 0.7351129  | -1.0320718 | 1.5764437  |
| H | 2.2733492  | -1.3402651 | 0.1877926  |
| H | -0.8441682 | -2.1572434 | 3.3574921  |
| H | -1.2063081 | -0.5717356 | -1.8836640 |
| H | 0.3563632  | -0.3279327 | -2.6867634 |
| H | -0.7157095 | 1.0160504  | -0.1839918 |
| C | 0.2418843  | -2.7312345 | -0.9314273 |
| O | 0.7567415  | -3.4814740 | -0.1114745 |
| C | -0.6506593 | -3.2210674 | -2.0351401 |
| H | -0.6041390 | -4.3070764 | -2.0659853 |
| H | -0.3561883 | -2.8104020 | -2.8031282 |
| H | -1.6829426 | -2.9145745 | -1.8447783 |
| O | 1.4302529  | -1.0562777 | 2.5595008  |
| O | -0.5905027 | -1.0893468 | 1.5958498  |
| C | -1.1878501 | -1.2355624 | 2.8871704  |
| H | -2.2603105 | -1.2732987 | 2.7139571  |
| H | -0.9314768 | -0.3872463 | 3.5226245  |
| N | 0.0422571  | 2.1245105  | -1.7107913 |
| N | 0.8906837  | 2.2351411  | -2.5814980 |
| N | 1.6248118  | 2.4424813  | -3.4093839 |

**Ac-(4R)Azp-OMe (3R-OMe) endo trans**

$\Psi = -28.3^\circ$ ,  $C^{\delta}-C^{\gamma}-N-N$  torsion =  $92.6^\circ$

|   |            |            |            |
|---|------------|------------|------------|
| H | 1.5172302  | 1.2621476  | 0.6002615  |
| C | 1.3742256  | 0.5866018  | -0.2421550 |
| C | 1.2859554  | -0.8833386 | 0.1751381  |
| N | 0.4595851  | -1.4734873 | -0.8587458 |
| C | -0.1336427 | -0.4920735 | -1.7473867 |
| C | 0.0661327  | 0.8180914  | -0.9832866 |
| H | 2.2070572  | 0.7189396  | -0.9362014 |
| C | 0.7126264  | -1.0252188 | 1.5751067  |
| H | 2.2677649  | -1.3565321 | 0.2108835  |
| H | -0.8713880 | -2.1097545 | 3.3774049  |
| H | -1.1870217 | -0.7018560 | -1.9362646 |
| H | 0.3929501  | -0.4439305 | -2.7071910 |
| H | -0.7513044 | 0.9548163  | -0.2692215 |
| C | 0.2601747  | -2.8090567 | -0.8796847 |
| O | 0.7715769  | -3.5274576 | -0.0291507 |
| C | -0.6137073 | -3.3442029 | -1.9775958 |
| H | -0.5578351 | -4.4302022 | -1.9705523 |
| H | -0.3095447 | -2.9642170 | -2.9550636 |
| H | -1.6510318 | -3.0405356 | -1.8115905 |
| O | 1.3987288  | -1.0119036 | 2.5647715  |
| O | -0.6128665 | -1.0945847 | 1.5855461  |

|   |            |            |            |
|---|------------|------------|------------|
| C | -1.2195097 | -1.2064124 | 2.8757895  |
| H | -2.2901477 | -1.2597718 | 2.6953081  |
| H | -0.9764575 | -0.3365199 | 3.4868860  |
| N | 0.1698981  | 1.9812458  | -1.8649927 |
| N | -0.8703796 | 2.5732490  | -2.0986250 |
| N | -1.7665545 | 3.1962721  | -2.3730099 |

**Ac-(4S)Azp-NMe<sub>2</sub> (3S-NMe<sub>2</sub>) exo cis**

**Ψ =162.3°, C<sup>δ</sup>-C<sup>γ</sup>-N-N torsion = 61.2°**

|   |            |            |            |
|---|------------|------------|------------|
| H | 0.4172442  | 1.2514163  | 1.4085316  |
| C | 1.1289938  | 1.1798127  | 0.5802091  |
| C | 0.9939322  | -0.1933814 | -0.0987243 |
| N | 0.1350773  | 0.0644451  | -1.2407093 |
| C | -0.3546563 | 1.4238320  | -1.2735058 |
| C | 0.7359710  | 2.1695212  | -0.5134553 |
| H | 2.1274297  | 1.3573769  | 0.9766777  |
| C | 0.3632247  | -1.1956665 | 0.8757890  |
| H | 1.9641960  | -0.5492629 | -0.4501897 |
| H | -0.4255970 | -2.8980166 | 2.5012600  |
| H | -1.3214428 | 1.5107914  | -0.7608213 |
| H | -0.4790947 | 1.7610439  | -2.3006303 |
| H | 1.5812736  | 2.3456006  | -1.1785887 |
| C | -0.2058796 | -0.8310626 | -2.1955977 |
| O | -0.9690041 | -0.5271611 | -3.1041551 |
| C | 0.3945896  | -2.2054422 | -2.0905203 |
| H | 0.2395494  | -2.7197051 | -3.0361630 |
| H | -0.1086178 | -2.7620134 | -1.2966016 |
| H | 1.4616019  | -2.1784465 | -1.8608436 |
| O | -0.8421780 | -1.3963014 | 0.8352346  |
| C | 0.6106756  | -2.6917655 | 2.7534882  |
| H | 0.6560546  | -2.2420601 | 3.7504418  |
| H | 1.1778609  | -3.6258513 | 2.7685093  |
| N | 0.3569079  | 3.5001818  | -0.0363029 |
| N | -0.5728081 | 3.5510808  | 0.7528305  |
| N | -1.4116218 | 3.7162885  | 1.4855312  |
| C | 2.5844610  | -1.5192586 | 1.9479205  |
| H | 3.1419118  | -2.4591881 | 1.9754245  |
| H | 2.9886530  | -0.9111546 | 1.1448375  |
| H | 2.7525804  | -0.9948665 | 2.8942544  |
| N | 1.1774743  | -1.7961626 | 1.7676962  |

**Ac-(4S)Azp-NMe<sub>2</sub> (3S-NMe<sub>2</sub>) exo cis**

**Ψ =162.5°, C<sup>δ</sup>-C<sup>γ</sup>-N-N torsion = -162.3°**

|   |            |            |            |
|---|------------|------------|------------|
| H | 0.4435462  | 1.2411014  | 1.4555103  |
| C | 1.1619187  | 1.1582301  | 0.6356652  |
| C | 1.0085088  | -0.2012427 | -0.0660131 |
| N | 0.1341698  | 0.0872291  | -1.1883380 |
| C | -0.3279602 | 1.4580680  | -1.1946665 |
| C | 0.7815576  | 2.1700432  | -0.4427750 |
| H | 2.1627301  | 1.3112315  | 1.0381196  |
| C | 0.3884273  | -1.2186912 | 0.8991339  |
| H | 1.9707163  | -0.5571062 | -0.4398259 |
| H | -0.3805984 | -2.9489431 | 2.5046413  |
| H | -1.2782771 | 1.5676301  | -0.6591734 |
| H | -0.4615129 | 1.8095789  | -2.2159376 |
| H | 1.6276105  | 2.3455761  | -1.1156986 |
| C | -0.2321555 | -0.7848654 | -2.1543802 |
| O | -1.0003802 | -0.4527641 | -3.0492321 |
| C | 0.3452798  | -2.1712854 | -2.0811429 |
| H | 0.1799159  | -2.6615680 | -3.0377450 |
| H | -0.1665675 | -2.7362272 | -1.2988250 |
| H | 1.4128530  | -2.1684464 | -1.8525769 |
| O | -0.8177433 | -1.4166940 | 0.8733162  |
| C | 0.6595469  | -2.7490561 | 2.7458203  |
| H | 0.7196176  | -2.3161237 | 3.7494668  |
| H | 1.2246791  | -3.6844705 | 2.7376411  |
| N | 0.2929217  | 3.4420414  | 0.0916599  |
| N | 1.1472576  | 4.2481397  | 0.4164559  |
| N | 1.8518247  | 5.0641113  | 0.7413575  |
| C | 2.6241675  | -1.5662580 | 1.9331790  |
| H | 3.1785295  | -2.5081955 | 1.9502481  |
| H | 3.0213813  | -0.9567639 | 1.1276258  |
| H | 2.8052995  | -1.0465520 | 2.8798025  |
| N | 1.2145845  | -1.8385532 | 1.7671073  |

**Ac-(4S)Azp-NMe<sub>2</sub> (3S-NMe<sub>2</sub>) exo cis**

**Ψ =163.2°, C<sup>δ</sup>-C<sup>γ</sup>-N-N torsion = -86.5°**

|   |            |            |            |
|---|------------|------------|------------|
| H | 0.4908024  | 1.2683949  | 1.3756681  |
| C | 1.1946562  | 1.1549483  | 0.5468703  |
| C | 1.0179928  | -0.2214353 | -0.1155399 |
| N | 0.1482924  | 0.0471062  | -1.2461726 |
| C | -0.3140468 | 1.4171544  | -1.2728282 |
| C | 0.8127798  | 2.1416015  | -0.5445852 |
| H | 2.2017815  | 1.3104597  | 0.9307761  |
| C | 0.3818237  | -1.2031405 | 0.8762288  |
| H | 1.9741122  | -0.6038878 | -0.4784448 |
| H | -0.4128772 | -2.8720494 | 2.5340163  |
| H | -1.2565306 | 1.5370840  | -0.7259727 |
| H | -0.4605531 | 1.7478040  | -2.2998528 |
| H | 1.6530548  | 2.2947690  | -1.2299833 |
| C | -0.2202067 | -0.8430861 | -2.1949671 |
| O | -0.9876517 | -0.5270656 | -3.0962299 |
| C | 0.3555845  | -2.2284158 | -2.0938357 |
| H | 0.1735674  | -2.7442556 | -3.0337876 |
| H | -0.1425781 | -2.7714035 | -1.2874891 |
| H | 1.4270558  | -2.2201276 | -1.8842102 |
| O | -0.8251907 | -1.3953047 | 0.8449979  |
| C | 0.6268857  | -2.6715547 | 2.7763787  |
| H | 0.6825497  | -2.2045609 | 3.7648957  |
| H | 1.1848766  | -3.6108214 | 2.8049880  |
| N | 0.4072911  | 3.4167356  | 0.0492004  |
| N | 0.4642575  | 4.3905259  | -0.6826220 |
| N | 0.4869602  | 5.3528510  | -1.2659067 |
| C | 2.6061781  | -1.5298746 | 1.9396747  |
| H | 3.1519354  | -2.4744295 | 2.0075648  |
| H | 3.0167107  | -0.9636443 | 1.1095092  |
| H | 2.7824486  | -0.9667277 | 2.8620648  |
| N | 1.1962938  | -1.7995024 | 1.7712464  |

**Ac-(4S)Azp-NMe<sub>2</sub> (3S-NMe<sub>2</sub>) exo cis**

**Ψ =-38.4°, C<sup>δ</sup>-C<sup>γ</sup>-N-N torsion = -90.6°**

|   |            |            |            |
|---|------------|------------|------------|
| H | -0.0898738 | 1.7158683  | 1.1493353  |
| C | 0.8385014  | 1.4836612  | 0.6212703  |
| C | 0.8252762  | 0.0517833  | 0.0810053  |
| N | 0.2231514  | 0.1882384  | -1.2409834 |
| C | 0.0161273  | 1.5737251  | -1.6175195 |
| C | 0.9139179  | 2.3293035  | -0.6393508 |
| H | 1.6679691  | 1.6509536  | 1.3059623  |
| C | 0.2019342  | -0.9313577 | 1.0742215  |
| H | 1.8533210  | -0.3074130 | -0.0165475 |
| H | -0.8826018 | -2.7459649 | -2.3701058 |
| H | -1.0280935 | 1.8824159  | -1.4874210 |
| H | 0.2821809  | 1.7255984  | -2.6629987 |
| H | 1.9408079  | 2.3463782  | -1.0184980 |
| C | 0.0339123  | -0.8089316 | -2.1375597 |
| O | -0.4361259 | -0.5774675 | -3.2445870 |
| C | 0.4053898  | -2.2000410 | -1.7054605 |
| H | 0.4556650  | -2.8298794 | -2.5906324 |
| H | -0.3613778 | -2.6001810 | -1.0367825 |
| H | 1.3571375  | -2.2338287 | -1.1725848 |
| O | 0.9777421  | -1.5590637 | 1.7873434  |
| C | -1.6796064 | -2.0872773 | 2.0364172  |
| H | -2.4336724 | -2.6665270 | 1.4976868  |
| H | -2.1521409 | -1.6269406 | 2.9092264  |
| N | 0.4513782  | 3.6914810  | -0.3700266 |
| N | 0.8911739  | 4.5628807  | -1.1014179 |
| N | 1.2406093  | 5.4432054  | -1.7090560 |
| N | -1.1346513 | -1.0739842 | 1.1561424  |
| C | -2.1223968 | -0.2970037 | 0.4376672  |
| H | -1.7556555 | 0.6902637  | 0.1783251  |
| H | -2.4522571 | -0.8026500 | -0.4752223 |
| H | -2.9893137 | -0.1626942 | 1.0869355  |

**Ac-(4S)Azp-NMe<sub>2</sub> (3S-NMe<sub>2</sub>) exo cis**

**Ψ =-38.4°, C<sup>δ</sup>-C<sup>γ</sup>-N-N torsion = -162.0°**

|   |            |            |            |
|---|------------|------------|------------|
| H | -0.0371964 | 1.6750531  | 1.2165381  |
| C | 0.8947182  | 1.4331690  | 0.6994030  |
| C | 0.8554960  | 0.0149537  | 0.1242878  |
| N | 0.2751812  | 0.1990498  | -1.2015048 |
| C | 0.1138312  | 1.5977986  | -1.5509064 |
| C | 1.0112608  | 2.3051915  | -0.5479374 |
| H | 1.7171706  | 1.5613099  | 1.4015973  |
| C | 0.1938500  | -0.9741331 | 1.0860237  |
| H | 1.8757862  | -0.3670187 | 0.0321851  |

|   |            |            |            |
|---|------------|------------|------------|
| H | -0.9536968 | -2.7858804 | 2.3299439  |
| H | -0.9234819 | 1.9334340  | -1.4319164 |
| H | 0.4014834  | 1.7657567  | -2.5876190 |
| H | 2.0442395  | 2.3031610  | -0.9116129 |
| C | 0.0689211  | -0.7718862 | -2.1225468 |
| O | -0.3801664 | -0.5024032 | -3.2296548 |
| C | 0.3950895  | -2.1825616 | -1.7180027 |
| H | 0.4405422  | -2.7928577 | -2.6170220 |
| H | -0.3922023 | -2.5764164 | -1.0697712 |
| H | 1.3377479  | -2.2557438 | -1.1730519 |
| O | 0.9436642  | -1.6369439 | 1.7952218  |
| C | -1.7295019 | -2.1014907 | 1.9980709  |
| H | -2.4886619 | -2.6512445 | 1.4360807  |
| H | -2.2045760 | -1.6478143 | 2.8729871  |
| N | 0.5489310  | 3.6803258  | -0.3563715 |
| N | 1.3534720  | 4.4488192  | 0.1431144  |
| N | 2.0169197  | 5.2400549  | 0.5907253  |
| C | -2.1052691 | -0.2677104 | 0.4323114  |
| H | -1.7101571 | 0.7142890  | 0.1956901  |
| H | -2.4366232 | -0.7474732 | -0.4939035 |
| H | -2.9765274 | -0.1232322 | 1.0735652  |
| N | -1.1469926 | -1.0837067 | 1.1475220  |

**Ac-(4S)Azp-NMe<sub>2</sub> (3S-NMe<sub>2</sub>) exo cis**

**Ψ = -38.8°, C<sup>δ</sup>-C<sup>γ</sup>-N-N torsion = 61.9°**

|   |            |            |            |
|---|------------|------------|------------|
| H | -0.0355165 | 1.6382449  | 1.2558174  |
| C | 0.8856539  | 1.4250319  | 0.7049920  |
| C | 0.8490358  | 0.0113290  | 0.1191385  |
| N | 0.2486172  | 0.1965049  | -1.1980091 |
| C | 0.0675138  | 1.5935244  | -1.5403103 |
| C | 0.9683790  | 2.3090831  | -0.5355498 |
| H | 1.7221879  | 1.5599700  | 1.3879527  |
| C | 0.2087702  | -0.9905772 | 1.0826259  |
| H | 1.8713816  | -0.3603495 | 0.0107430  |
| H | -0.9086534 | -2.8141268 | 2.3358584  |
| H | -0.9793385 | 1.9040350  | -1.4238357 |
| H | 0.3481203  | 1.7722575  | -2.5770858 |
| H | 1.9912177  | 2.3215748  | -0.9114565 |
| O | 0.0404431  | -0.7726923 | -2.1218008 |
| C | -0.4273436 | -0.5013951 | -3.2202392 |
| C | 0.3885094  | -2.1812688 | -1.7293784 |
| H | 0.4266854  | -2.7867309 | -2.6319893 |
| H | -0.3841447 | -2.5869748 | -1.0709046 |
| H | 1.3403278  | -2.2462999 | -1.1995593 |
| O | 0.9734500  | -1.6545171 | 1.7741733  |
| C | -1.6941552 | -2.1344284 | 2.0175392  |
| H | -2.4560550 | -2.6875336 | 1.4626065  |
| H | -2.1613645 | -1.6884720 | 2.9005296  |
| N | 0.6362021  | 3.7186610  | -0.3196314 |
| N | -0.4723067 | 3.9470739  | 0.1360696  |
| N | -1.4671103 | 4.2680223  | 0.5550728  |
| C | -2.1049936 | -0.2947495 | 0.4684811  |
| H | -1.7217718 | 0.6924249  | 0.2337994  |
| H | -2.4443628 | -0.7691326 | -0.4575002 |
| H | -2.9687115 | -0.1614764 | 1.1220141  |
| N | -1.1305014 | -1.1077138 | 1.1646898  |

**Ac-(4S)Azp-NMe<sub>2</sub> (3S-NMe<sub>2</sub>) exo trans**

**Ψ = 132.8°, C<sup>δ</sup>-C<sup>γ</sup>-N-N torsion = 63.5°**

|   |            |            |            |
|---|------------|------------|------------|
| H | 0.0848596  | 1.5627979  | 1.3823994  |
| C | 0.9222402  | 1.5063431  | 0.6814715  |
| C | 1.0096292  | 0.0849182  | 0.1207496  |
| N | 0.2424957  | 0.1542223  | -1.1171320 |
| C | -0.3202672 | 1.4635449  | -1.3569638 |
| C | 0.6148576  | 2.3592010  | -0.5464013 |
| H | 1.8330898  | 1.8113393  | 1.1945499  |
| C | 0.3617303  | -0.9088369 | 1.0874657  |
| H | 2.0370212  | -0.1848214 | -0.1187652 |
| H | -0.4129437 | -2.3818699 | 2.9298382  |
| H | -1.3468723 | 1.5339141  | -0.9748219 |
| H | -0.3225362 | 1.7186477  | -2.4158499 |
| H | 1.5258003  | 2.5354744  | -1.1186226 |
| C | 0.1187760  | -0.9436670 | -1.8877599 |
| O | 0.6705953  | -1.9926194 | -1.5681306 |
| C | -0.7105065 | -0.8131500 | -3.1337259 |
| H | -0.8026066 | -1.7938535 | -3.5944610 |
| H | -0.2354280 | -0.1286609 | -3.8412953 |

|   |            |            |            |
|---|------------|------------|------------|
| H | -1.7035740 | -0.4195457 | -2.9063501 |
| O | -0.8387814 | -0.8033393 | 1.3120315  |
| C | 0.5701260  | -2.7399636 | 2.6356074  |
| H | 1.2084308  | -2.8200041 | 3.5179821  |
| H | 0.4651909  | -3.7329862 | 2.1867391  |
| N | 0.0878097  | 3.6959857  | -0.2701599 |
| N | -0.9192111 | 3.7534658  | 0.4177050  |
| N | -1.8394198 | 3.9271557  | 1.0424187  |
| C | 2.5282227  | -2.0584874 | 1.2931989  |
| H | 2.5867916  | -2.3098107 | 0.2320020  |
| H | 3.1772543  | -1.2058416 | 1.5051745  |
| H | 2.8996709  | -2.9058039 | 1.8669847  |
| N | 1.1543582  | -1.8095182 | 1.6932084  |

**Ac-(4S)Azp-NMe<sub>2</sub> (3S-NMe<sub>2</sub>) exo trans**

**Ψ = 133.1°, C<sup>δ</sup>-C<sup>γ</sup>-N-N torsion = -164.5°**

|   |            |            |            |
|---|------------|------------|------------|
| H | 0.1234852  | 1.5600152  | 1.3975904  |
| C | 0.9723794  | 1.4768222  | 0.7152716  |
| C | 1.0331673  | 0.0592462  | 0.1421330  |
| N | 0.2617857  | 0.1576422  | -1.0903621 |
| C | -0.2593417 | 1.4870179  | -1.3216519 |
| C | 0.6972372  | 2.3457225  | -0.5100174 |
| H | 1.8846719  | 1.7524697  | 1.2435870  |
| C | 0.3738574  | -0.9337842 | 1.1018066  |
| H | 2.0543423  | -0.2270248 | -0.1054121 |
| H | -0.4141646 | -2.4146197 | 2.9333235  |
| H | -1.2780193 | 1.5986858  | -0.9318540 |
| H | -0.2554241 | 1.7453942  | -2.3799013 |
| H | 1.6191519  | 2.5054027  | -1.0797326 |
| C | 0.1034610  | -0.9300778 | -1.8676615 |
| O | 0.6261606  | -1.9972919 | -1.5582978 |
| C | -0.7268560 | -0.7671032 | -3.1093366 |
| H | -0.8536943 | -1.7424169 | -3.5732757 |
| H | -0.2318424 | -0.0964838 | -3.8165781 |
| H | -1.7050355 | -0.3409280 | -2.8764068 |
| O | -0.8243002 | -0.8161899 | 1.3314279  |
| C | 0.5606551  | -2.7854974 | 2.6277099  |
| H | 1.2021510  | -2.8915278 | 3.5049525  |
| H | 0.4349145  | -3.7690790 | 2.1634681  |
| N | 0.0696891  | 3.6323860  | -0.2045444 |
| N | 0.8198790  | 4.5130887  | 0.1788924  |
| N | 1.4225759  | 5.3945423  | 0.5357555  |
| C | 2.5243681  | -2.1169698 | 1.2879639  |
| H | 2.5726520  | -2.3723928 | 0.2270565  |
| H | 3.1849782  | -1.2714923 | 1.4921736  |
| H | 2.8903049  | -2.9664079 | 1.8621796  |
| N | 1.1567001  | -1.8503677 | 1.6974207  |

**Ac-(4S)Azp-NMe<sub>2</sub> (3S-NMe<sub>2</sub>) exo trans**

**Ψ = 133.2°, C<sup>δ</sup>-C<sup>γ</sup>-N-N torsion = -89.9°**

|   |            |            |            |
|---|------------|------------|------------|
| H | 0.1069972  | 1.5946736  | 1.3340745  |
| C | 0.9535165  | 1.5005052  | 0.6501509  |
| C | 1.0209399  | 0.0718607  | 0.1067108  |
| N | 0.2545773  | 0.1403275  | -1.1310741 |
| C | -0.2842941 | 1.4587927  | -1.3813805 |
| C | 0.6722123  | 2.3437380  | -0.5835914 |
| H | 1.8644646  | 1.7942730  | 1.1699054  |
| C | 0.3618962  | -0.9051504 | 1.0827911  |
| H | 2.0440114  | -0.2155121 | -0.1312959 |
| H | -0.4309594 | -2.3583060 | 2.9336426  |
| H | -1.3017345 | 1.5645558  | -0.9871229 |
| H | -0.2883334 | 1.6987962  | -2.4444305 |
| H | 1.5915453  | 2.4990398  | -1.1579726 |
| C | 0.1115459  | -0.9625272 | -1.8903276 |
| O | 0.6449929  | -2.0181529 | -1.5606943 |
| C | -0.7156178 | -0.8300624 | -3.1377298 |
| H | -0.8266090 | -1.8139009 | -3.5875250 |
| H | -0.2275746 | -0.1629645 | -3.8530941 |
| H | -1.7008422 | -0.4148773 | -2.9147667 |
| O | -0.8387261 | -0.7914992 | 1.3014558  |
| C | 0.5512509  | -2.7247562 | 2.6470046  |
| H | 1.1841487  | -2.8038055 | 3.5333410  |
| H | 0.4419070  | -3.7198339 | 2.2036216  |
| N | 0.0887847  | 3.6323989  | -0.2070709 |
| N | 0.2442992  | 4.5440930  | -1.0012205 |
| N | 0.3369852  | 5.4537715  | -1.6579692 |
| C | 2.5201195  | -2.0670682 | 1.3097695  |



|   |           |            |           |
|---|-----------|------------|-----------|
| H | 2.5793018 | -2.3480828 | 0.2558643 |
| H | 3.1708192 | -1.2103133 | 1.4978735 |
| H | 2.8898627 | -2.8983003 | 1.9077052 |
| N | 1.1468095 | -1.8039591 | 1.7022678 |

**Ac-(4S)Azp-NMe<sub>2</sub> (3S-NMe<sub>2</sub>) exo trans**

**Ψ = -39.6°, C<sup>β</sup>-C<sup>γ</sup>-N-N torsion = -92.7°**

|   |            |            |            |
|---|------------|------------|------------|
| H | -0.1846731 | 1.7408143  | 1.1255986  |
| C | 0.7508273  | 1.5133418  | 0.6075046  |
| C | 0.7517868  | 0.0824548  | 0.0710162  |
| N | 0.1374315  | 0.2109785  | -1.2455044 |
| C | -0.0638333 | 1.5930385  | -1.6349314 |
| C | 0.8333524  | 2.3532733  | -0.6563048 |
| H | 1.5734739  | 1.6922091  | 1.2973376  |
| C | 0.1550348  | -0.9192550 | 1.0597167  |
| H | 1.7772841  | -0.2759574 | -0.0496497 |
| H | -2.3569413 | -2.7741284 | 1.4635971  |
| H | -1.1057269 | 1.9114884  | -1.5028478 |
| H | 0.2173460  | 1.7657027  | -2.6736261 |
| H | 1.8613701  | 2.3628910  | -1.0323102 |
| C | -0.0465933 | -0.8760568 | -2.0273085 |
| O | 0.2436806  | -1.9941595 | -1.6220880 |
| C | -0.6292166 | -0.6365842 | -3.3924434 |
| H | -0.8858090 | -1.5971402 | -3.8330131 |
| H | 0.1022195  | -0.1369043 | -4.0333724 |
| H | -1.5170244 | -0.0022184 | -3.3466379 |
| O | 0.9477840  | -1.5170642 | 1.7788988  |
| C | -1.6970757 | -2.1139101 | 2.0334977  |
| H | -2.2693838 | -1.6747651 | 2.8561011  |
| H | -0.8712584 | -2.6905699 | 2.4400927  |
| N | 0.3710695  | 3.7190290  | -0.4069693 |
| N | 0.8479387  | 4.5867657  | -1.1191418 |
| N | 1.2292602  | 5.4636739  | -1.7124815 |
| N | -1.1792919 | -1.0775958 | 1.1655138  |
| C | -2.1843495 | -0.3585831 | 0.4171362  |
| H | -1.8584121 | 0.6422854  | 0.1520815  |
| H | -2.4734508 | -0.8936993 | -0.4936037 |
| H | -3.0703498 | -0.2551976 | 1.0463977  |

**Ac-(4S)Azp-NMe<sub>2</sub> (3S-NMe<sub>2</sub>) exo trans**

**Ψ = -39.6°, C<sup>β</sup>-C<sup>γ</sup>-N-N torsion = -163.0°**

|   |            |            |            |
|---|------------|------------|------------|
| H | -0.1219634 | 1.6959938  | 1.1862075  |
| C | 0.8133050  | 1.4527604  | 0.6751352  |
| C | 0.7787376  | 0.0338289  | 0.1076093  |
| N | 0.1799890  | 0.2098127  | -1.2104197 |
| C | 0.0295994  | 1.6051474  | -1.5754176 |
| C | 0.9348745  | 2.3146371  | -0.5782421 |
| H | 1.6333848  | 1.5902392  | 1.3782270  |
| C | 0.1437227  | -0.9697729 | 1.0700262  |
| H | 1.7945100  | -0.3515764 | -0.0119314 |
| H | -2.4209732 | -2.7584551 | 1.4164652  |
| H | -1.0028940 | 1.9556106  | -1.4496613 |
| H | 0.3282407  | 1.7889858  | -2.6068226 |
| H | 1.9671436  | 2.2984152  | -0.9438400 |
| C | -0.0344148 | -0.8542539 | -2.0152572 |
| O | 0.2138718  | -1.9896304 | -1.6303034 |
| C | -0.5968292 | -0.5680090 | -3.3798253 |
| H | -0.8827387 | -1.5102894 | -3.8412917 |
| H | 0.1569704  | -0.0815935 | -4.0048365 |
| H | -1.4624089 | 0.0959656  | -3.3285622 |
| O | 0.9121474  | -1.6063258 | 1.7823571  |
| C | -1.7519397 | -2.1254236 | 2.0062413  |
| H | -2.3237695 | -1.6853164 | 2.8286225  |
| H | -0.9469598 | -2.7303557 | 2.4135023  |
| N | 0.4835145  | 3.6959573  | -0.4076978 |
| N | 1.2875630  | 4.4602852  | 0.0995771  |
| N | 1.9512590  | 5.2479980  | 0.5525318  |
| C | -2.1724464 | -0.3265603 | 0.4196511  |
| H | -1.8148908 | 0.6686230  | 0.1763221  |
| H | -2.4690817 | -0.8369901 | -0.5027390 |
| H | -3.0605149 | -0.2080607 | 1.0432931  |
| N | -1.1957161 | -1.0881917 | 1.1634753  |

**Ac-(4S)Azp-NMe<sub>2</sub> (3S-NMe<sub>2</sub>) exo trans**

**Ψ = -40.0°, C<sup>β</sup>-C<sup>γ</sup>-N-N torsion = -63.4°**

|   |            |           |           |
|---|------------|-----------|-----------|
| H | -0.1236589 | 1.6562953 | 1.2243325 |
| C | 0.8029627  | 1.4434748 | 0.6818840 |

|   |            |            |            |
|---|------------|------------|------------|
| C | 0.7743727  | 0.0299185  | 0.1013791  |
| N | 0.1584409  | 0.2077072  | -1.2090117 |
| C | -0.0130370 | 1.6016516  | -1.5652991 |
| C | 0.8929422  | 2.3195647  | -0.5630023 |
| H | 1.6348969  | 1.5874717  | 1.3684823  |
| C | 0.1600707  | -0.9879903 | 1.0626273  |
| H | 1.7927293  | -0.3433032 | -0.0327540 |
| H | -2.3853817 | -2.7987936 | 1.4301037  |
| H | -1.0559218 | 1.9258440  | -1.4430735 |
| H | 0.2804473  | 1.7986377  | -2.5956529 |
| H | 1.9157886  | 2.3195571  | -0.9391283 |
| C | -0.0488890 | -0.8551564 | -2.0189260 |
| O | 0.2191621  | -1.9883494 | -1.6423577 |
| C | -0.6281544 | -0.5683163 | -3.3760125 |
| H | -0.9050164 | -1.5115169 | -3.8410604 |
| H | 0.1126398  | -0.0669766 | -4.0047550 |
| H | -1.5027265 | 0.0826996  | -3.3121473 |
| O | 0.9422281  | -1.6245837 | 1.7592941  |
| C | -1.7154528 | -2.1630240 | 2.0158584  |
| H | -2.2817932 | -1.7319896 | 2.8467074  |
| H | -0.9007099 | -2.7629684 | 2.4108279  |
| N | 0.5693643  | 3.7337077  | -0.3676956 |
| N | -0.5287799 | 3.9747705  | 0.1069163  |
| N | -1.5135654 | 4.3078838  | 0.5394865  |
| C | -2.1694148 | -0.3582258 | 0.4458065  |
| H | -1.8261876 | 0.6437618  | 0.2075316  |
| H | -2.4690254 | -0.8612091 | -0.4796047 |
| H | -3.0527229 | -0.2553517 | 1.0786634  |
| N | -1.1774017 | -1.1162858 | 1.1726930  |

**Ac-(4S)Azp-OMe (3S-OMe) exo cis**

**Ψ = 158.2°, C<sup>β</sup>-C<sup>γ</sup>-N-N torsion = 60.8°**

|   |            |            |            |
|---|------------|------------|------------|
| H | 0.0805319  | 1.3198021  | 1.4096826  |
| C | 0.9308106  | 1.2262164  | 0.7266837  |
| C | 0.9253186  | -0.1659484 | 0.0754219  |
| N | 0.1919224  | 0.0276339  | -1.1607990 |
| C | -0.2412514 | 1.3972918  | -1.3459910 |
| C | 0.7328155  | 2.1658753  | -0.4593406 |
| H | 1.8442240  | 1.4173836  | 1.2861245  |
| C | 0.2621491  | -1.1542322 | 1.0159743  |
| H | 1.9482690  | -0.4990703 | -0.1175815 |
| H | -0.1115565 | -2.0138997 | 3.4826301  |
| H | -1.2756259 | 1.5360927  | -1.0072286 |
| H | -0.1863179 | 1.6761474  | -2.3966319 |
| H | 1.6760247  | 2.2982592  | -0.9893220 |
| C | -0.0250967 | -0.9122748 | -2.1124066 |
| O | -0.6521293 | -0.6455257 | -3.1286564 |
| C | 0.5276439  | -2.2870585 | -1.8595252 |
| H | 0.5374629  | -2.8307539 | -2.7994377 |
| H | -0.1220821 | -2.8161630 | -1.1559308 |
| H | 1.5351142  | -2.2666194 | -1.4378819 |
| O | -0.9097451 | -1.4236328 | 1.0178152  |
| O | 1.1503465  | -1.6448284 | 1.8721137  |
| C | 0.6315302  | -2.5286230 | 2.8729704  |
| H | 1.4853512  | -2.8224439 | 3.4777274  |
| H | 0.1751156  | -3.4011704 | 2.4050583  |
| N | 0.3097623  | 3.5219899  | -0.1106158 |
| N | -0.7349418 | 3.6225907  | 0.5130461  |
| N | -1.6784970 | 3.8337346  | 1.0896091  |

**Ac-(4S)Azp-OMe (3S-OMe) exo cis**

**Ψ = 159.1°, C<sup>β</sup>-C<sup>γ</sup>-N-N torsion = -161.5°**

|   |            |            |            |
|---|------------|------------|------------|
| H | 0.1144653  | 1.3194672  | 1.4209662  |
| C | 0.9679080  | 1.2053034  | 0.7472581  |
| C | 0.9429944  | -0.1813025 | 0.0844269  |
| N | 0.2026013  | 0.0344942  | -1.1432496 |
| C | -0.2097280 | 1.4140534  | -1.3104255 |
| C | 0.7808777  | 2.1571845  | -0.4316303 |
| H | 1.8840585  | 1.3749714  | 1.3104310  |
| C | 0.2775881  | -1.1707362 | 1.0217628  |
| H | 1.9604350  | -0.5250774 | -0.1198923 |
| H | -0.0967633 | -2.0401673 | 3.4850527  |
| H | -1.2313836 | 1.5776576  | -0.9495441 |
| H | -0.1636577 | 1.6991206  | -2.3598940 |
| H | 1.7265996  | 2.2855715  | -0.9687555 |
| C | -0.0341936 | -0.8911913 | -2.1029332 |
| O | -0.6638807 | -0.6050800 | -3.1127309 |

|   |            |            |            |
|---|------------|------------|------------|
| C | 0.5001453  | -2.2768540 | -1.8673592 |
| H | 0.4986074  | -2.8087566 | -2.8160456 |
| H | -0.1540461 | -2.8053077 | -1.1695539 |
| H | 1.5094807  | -2.2759495 | -1.4516601 |
| O | -0.8940921 | -1.4407410 | 1.0231601  |
| O | 1.1658687  | -1.6647956 | 1.8765591  |
| C | 0.6467833  | -2.5522709 | 2.8737071  |
| H | 1.5002884  | -2.8482736 | 3.4778997  |
| H | 0.1907299  | -3.4232587 | 2.4024912  |
| N | 0.2350946  | 3.4603567  | -0.0528044 |
| N | 1.0427546  | 4.2821929  | 0.3457116  |
| N | 1.7006994  | 5.1147121  | 0.7211533  |

**Ac-(4S)Azp-OMe (3S-OMe) exo cis**

**$\Psi = 160.4^\circ$ ,  $C^5-C^7-N-N$  torsion  $= -87.6^\circ$**

|   |            |            |            |
|---|------------|------------|------------|
| H | 0.1229603  | 1.3453723  | 1.3610418  |
| C | 0.9640029  | 1.2178885  | 0.6740741  |
| C | 0.9339678  | -0.1836985 | 0.0432792  |
| N | 0.1938534  | 0.0028371  | -1.1891279 |
| C | -0.2431632 | 1.3724668  | -1.3703780 |
| C | 0.7559628  | 2.1435598  | -0.5133435 |
| H | 1.8876663  | 1.4053188  | 1.2179531  |
| C | 0.2672080  | -1.1513189 | 1.0026093  |
| H | 1.9502421  | -0.5349622 | -0.1534291 |
| H | -0.1303478 | -1.9458300 | 3.4884165  |
| H | -1.2608352 | 1.5257052  | -0.9940399 |
| H | -0.2181140 | 1.6406215  | -2.4255150 |
| H | 1.6937636  | 2.2693798  | -1.0645850 |
| C | -0.0282130 | -0.9402687 | -2.1355683 |
| O | -0.6617660 | -0.6788008 | -3.1496078 |
| C | 0.5287792  | -2.3131637 | -1.8789932 |
| H | 0.5184763  | -2.8662686 | -2.8153666 |
| H | -0.1045504 | -2.8348715 | -1.1572944 |
| H | 1.5452569  | -2.2877233 | -1.4817828 |
| O | -0.9002498 | -1.4387827 | 0.9950936  |
| O | 1.1493102  | -1.6044941 | 1.8859078  |
| C | 0.6281251  | -2.4670067 | 2.9036533  |
| H | 1.4769779  | -2.7321827 | 3.5283772  |
| H | 0.1899922  | -3.3585002 | 2.4543078  |
| N | 0.2576533  | 3.4417190  | -0.0584198 |
| N | 0.4424470  | 4.3813088  | -0.8139266 |
| N | 0.5672364  | 5.3159912  | -1.4280023 |

**Ac-(4S)Azp-OMe (3S-OMe) exo cis**

**$\Psi = -30.4^\circ$ ,  $C^5-C^7-N-N$  torsion  $= -89.3^\circ$**

|   |            |            |            |
|---|------------|------------|------------|
| H | -0.0049568 | 1.5105799  | 1.3000649  |
| C | 0.8786399  | 1.3545215  | 0.6754250  |
| C | 0.8924878  | -0.0755731 | 0.1146344  |
| N | 0.2054486  | 0.0465067  | -1.1594404 |
| C | -0.2053252 | 1.4074072  | -1.4418785 |
| C | 0.7455005  | 2.2190882  | -0.5674798 |
| H | 1.7653922  | 1.5719366  | 1.2674396  |
| C | 0.2507104  | -1.0126640 | 1.1188865  |
| H | 1.9191833  | -0.4242554 | -0.0210594 |
| H | -1.4010668 | -2.9181158 | 1.8862090  |
| H | -1.2429630 | 1.5876556  | -1.1392965 |
| H | -0.1124319 | 1.6175748  | -2.5064358 |
| H | 1.7149033  | 2.3154992  | -1.0674497 |
| C | 0.0103686  | -0.9502415 | -2.0544894 |
| O | -0.5774006 | -0.7464087 | -3.1085816 |
| C | 0.5353974  | -2.3103846 | -1.6855628 |
| H | 0.5463918  | -2.9274229 | -2.5810314 |
| H | -0.1289306 | -2.7769052 | -0.9532267 |
| H | 1.5374016  | -2.2725054 | -1.2546931 |
| O | 0.8821199  | -1.5914079 | 1.9659761  |
| O | -1.0669021 | -1.0724482 | 0.9908951  |
| C | -1.7527278 | -1.8877350 | 1.9472041  |
| H | -2.8052644 | -1.8272812 | 1.6836126  |
| H | -1.5863904 | -1.5077976 | 2.9555354  |
| N | 0.2248723  | 3.5389706  | -0.2110177 |
| N | 0.4852081  | 4.4451322  | -0.9848821 |
| N | 0.6733540  | 5.3527420  | -1.6228990 |

**Ac-(4S)Azp-OMe (3S-OMe) exo cis**

**$\Psi = -30.7^\circ$ ,  $C^5-C^7-N-N$  torsion  $= -161.4^\circ$**

|   |           |           |           |
|---|-----------|-----------|-----------|
| H | 0.0199847 | 1.4658648 | 1.3662806 |
| C | 0.9099737 | 1.3148702 | 0.7497208 |

|   |            |            |            |
|---|------------|------------|------------|
| C | 0.9089118  | -0.0988154 | 0.1484770  |
| N | 0.2241677  | 0.0696643  | -1.1215390 |
| C | -0.1494115 | 1.4468295  | -1.3774625 |
| C | 0.8036608  | 2.2148856  | -0.4786463 |
| H | 1.7934069  | 1.4998102  | 1.3584957  |
| C | 0.2553782  | -1.0553296 | 1.1261114  |
| H | 1.9317896  | -0.4552338 | 0.0035875  |
| H | -1.4242585 | -2.9562145 | 1.8413952  |
| H | -1.1866447 | 1.6455976  | -1.0851390 |
| H | -0.0377580 | 1.6802125  | -2.4348376 |
| H | 1.7795607  | 2.3058452  | -0.9672484 |
| C | 0.0066160  | -0.9006277 | -2.0399343 |
| O | -0.5748880 | -0.6578299 | -3.0892386 |
| C | 0.4982334  | -2.2816702 | -1.7039420 |
| H | 0.5054501  | -2.8733156 | -2.6164640 |
| H | -0.1847934 | -2.7536863 | -0.9926629 |
| H | 1.4959569  | -2.2787909 | -1.2616947 |
| O | 0.8799169  | -1.6688372 | 1.9536982  |
| O | -1.0634125 | -1.0898732 | 1.0010486  |
| C | -1.7596077 | -1.9227821 | 1.9343621  |
| H | -2.8116830 | -1.8380503 | 1.6756526  |
| H | -1.5850014 | -1.5760605 | 2.9532096  |
| N | 0.2585118  | 3.5409433  | -0.1893405 |
| N | 1.0565225  | 4.3698428  | 0.2145724  |
| N | 1.7060300  | 5.2102468  | 0.5867647  |

**Ac-(4S)Azp-OMe (3S-OMe) exo cis**

**$\Psi = -31.7^\circ$ ,  $C^5-C^7-N-N$  torsion  $= 61.0^\circ$**

|   |            |            |            |
|---|------------|------------|------------|
| H | 0.0021979  | 1.4583813  | 1.3668471  |
| C | 0.8822042  | 1.3330494  | 0.7281827  |
| C | 0.8977798  | -0.0842844 | 0.1359401  |
| N | 0.2078813  | 0.0625773  | -1.1346038 |
| C | -0.1959016 | 1.4280735  | -1.4001460 |
| C | 0.7459097  | 2.2242432  | -0.5028467 |
| H | 1.7701259  | 1.5411753  | 1.3215242  |
| C | 0.2570228  | -1.0430880 | 1.1203716  |
| H | 1.9250492  | -0.4274111 | -0.0082524 |
| H | -1.4176495 | -2.9426649 | 1.8535127  |
| H | -1.2431330 | 1.5944388  | -1.1178799 |
| H | -0.0879434 | 1.6594744  | -2.4582588 |
| H | 1.7127977  | 2.3282181  | -0.9950768 |
| C | 0.0036130  | -0.9201398 | -2.0440123 |
| O | -0.5873719 | -0.6962031 | -3.0917541 |
| C | 0.5222505  | -2.2885068 | -1.6979863 |
| H | 0.5316806  | -2.8897483 | -2.6041757 |
| H | -0.1457424 | -2.7650384 | -0.9754171 |
| H | 1.5236445  | -2.2630966 | -1.2648923 |
| O | 0.8900371  | -1.6558695 | -1.9416985 |
| O | -1.0629800 | -1.0776001 | 1.0077668  |
| C | -1.7511040 | -1.9088545 | 1.9487488  |
| H | -2.8055064 | -1.8232190 | 1.7001274  |
| H | -1.5661866 | -1.5610038 | 2.9653659  |
| N | 0.3191138  | 3.5965122  | -0.2289336 |
| N | -0.7493723 | 3.7278824  | 0.3464076  |
| N | -1.7148900 | 3.9656477  | 0.8743756  |

**Ac-(4S)Azp-OMe (3S-OMe) exo trans**

**$\Psi = 144.8^\circ$ ,  $C^5-C^7-N-N$  torsion  $= 62.7^\circ$**

|   |            |            |            |
|---|------------|------------|------------|
| H | 0.0270572  | 1.3971772  | 1.3670936  |
| C | 0.8952192  | 1.3060276  | 0.7068023  |
| C | 0.9162918  | -0.0890694 | 0.0756021  |
| N | 0.1720020  | 0.0796729  | -1.1592679 |
| C | -0.2479817 | 1.4454294  | -1.3870036 |
| C | 0.7175066  | 2.2271747  | -0.4973319 |
| H | 1.7941976  | 1.5191207  | 1.2818719  |
| C | 0.2505492  | -1.1021707 | 0.9874714  |
| H | 1.9339976  | -0.4246556 | -0.1355801 |
| H | 0.0201348  | -2.2514640 | 3.3475928  |
| H | -1.2851077 | 1.6057586  | -1.0651193 |
| H | -0.1627543 | 1.7279978  | -2.4355850 |
| H | 1.6682951  | 2.3452590  | -1.0170914 |
| C | -0.0457153 | -0.9875900 | -1.9578883 |
| O | 0.3885623  | -2.0902176 | -1.6465723 |
| C | -0.8287756 | -0.7460764 | -3.2161060 |
| H | -1.0179004 | -1.7026638 | -3.6972892 |
| H | -0.2654553 | -0.1061237 | -3.9002624 |
| H | -1.7771183 | -0.2488893 | -3.0008822 |

|   |            |            |            |
|---|------------|------------|------------|
| O | -0.9402011 | -1.2034556 | 1.1284008  |
| O | 1.1512891  | -1.8059601 | 1.6606859  |
| C | 0.6260711  | -2.7550176 | 2.5935113  |
| H | 1.4904983  | -3.2286087 | 3.0517470  |
| H | 0.0162531  | -3.4941884 | 2.0732455  |
| N | 0.2916851  | 3.5917119  | -0.1885824 |
| N | -0.7472096 | 3.7077423  | 0.4425512  |
| N | -1.6862012 | 3.9334582  | 1.0207541  |

**Ac-(4S)Azp-OMe (3S-OMe) exo trans**

**Ψ =145.2°, C<sup>δ</sup>-C<sup>γ</sup>-N-N torsion =-162.9°**

|   |            |            |            |
|---|------------|------------|------------|
| H | 0.0593799  | 1.4015245  | 1.3697215  |
| C | 0.9327838  | 1.2843597  | 0.7228546  |
| C | 0.9325361  | -0.1077199 | 0.0844349  |
| N | 0.1857862  | 0.0820952  | -1.1450989 |
| C | -0.2060712 | 1.4591542  | -1.3625727 |
| C | 0.7744875  | 2.2139443  | -0.4786142 |
| H | 1.8329723  | 1.4751244  | 1.3051202  |
| C | 0.2572044  | -1.1168811 | 0.9933690  |
| H | 1.9441557  | -0.4576287 | -0.1334892 |
| H | 0.0209149  | -2.2744910 | 3.3490845  |
| H | -1.2315088 | 1.6505231  | -1.0253261 |
| H | -0.1225289 | 1.7425928  | -2.4111770 |
| H | 1.7311155  | 2.3223394  | -1.0008198 |
| C | -0.0551541 | -0.9741467 | -1.9501832 |
| O | 0.3596899  | -2.0877841 | -1.6501368 |
| C | -0.8391846 | -0.7087444 | -3.2032812 |
| H | -1.0512571 | -1.6584327 | -3.6885814 |
| H | -0.2651302 | -0.0777732 | -3.8868996 |
| H | -1.7753131 | -0.1919404 | -2.9810945 |
| O | -0.9339192 | -1.2080451 | 1.1370466  |
| O | 1.1527286  | -1.8329201 | 1.6615912  |
| C | 0.6201232  | -2.7806279 | 2.5913351  |
| H | 1.4807028  | -3.2649732 | 3.0456170  |
| H | 0.0016821  | -3.5114205 | 2.0693759  |
| N | 0.2295678  | 3.5303817  | -0.1478071 |
| N | 1.0302114  | 4.3483925  | 0.2728229  |
| N | 1.6823006  | 5.1780269  | 0.6640698  |

**Ac-(4S)Azp-OMe (3S-OMe) exo trans**

**Ψ =145.7°, C<sup>δ</sup>-C<sup>γ</sup>-N-N torsion =-90.9°**

|   |            |            |            |
|---|------------|------------|------------|
| H | 0.0401988  | 1.4321921  | 1.3115374  |
| C | 0.9075250  | 1.3100010  | 0.6573016  |
| C | 0.9171575  | -0.0947979 | 0.0477782  |
| N | 0.1691295  | 0.0614153  | -1.1857309 |
| C | -0.2516362 | 1.4267822  | -1.4199725 |
| C | 0.7293727  | 2.2143953  | -0.5523576 |
| H | 1.8099937  | 1.5245955  | 1.2265681  |
| C | 0.2511382  | -1.0915257 | 0.9771955  |
| H | 1.9314460  | -0.4409208 | -0.1633977 |
| H | 0.0182467  | -2.1934343 | 3.3600249  |
| H | -1.2766501 | 1.6037872  | -1.0740339 |
| H | -0.1838156 | 1.6945265  | -2.4742713 |
| H | 1.6801599  | 2.3266963  | -1.0835947 |
| C | -0.0513240 | -1.0121089 | -1.9742596 |
| O | 0.3836305  | -2.1127867 | -1.6559652 |
| C | -0.8379420 | -0.7811945 | -3.2325513 |
| H | -1.0297523 | -1.7420476 | -3.7041307 |
| H | -0.2755333 | -0.1488768 | -3.9245616 |
| H | -1.7848152 | -0.2804870 | -3.0193812 |
| O | -0.9393360 | -1.1988987 | 1.1149618  |
| O | 1.1533444  | -1.7765316 | 1.6685199  |
| C | 0.6299353  | -2.7089519 | 2.6187635  |
| H | 1.4952164  | -3.1679974 | 3.0900688  |
| H | 0.0262854  | -3.4623660 | 2.1118825  |
| N | 0.2172351  | 3.5229885  | -0.1459458 |
| N | 0.4780187  | 4.4553562  | -0.8875570 |
| N | 0.6674537  | 5.3840921  | -1.4942975 |

**Ac-(4S)Azp-OMe (3S-OMe) exo trans**

**Ψ =-34.6°, C<sup>δ</sup>-C<sup>γ</sup>-N-N torsion =-92.7°**

|   |            |            |            |
|---|------------|------------|------------|
| H | -0.0224054 | 1.5042038  | 1.2777656  |
| C | 0.8591999  | 1.3553931  | 0.6484923  |
| C | 0.8639718  | -0.0588971 | 0.0600861  |
| N | 0.1391093  | 0.0881788  | -1.1898050 |
| C | -0.2405202 | 1.4590875  | -1.4622173 |
| C | 0.7310645  | 2.2421485  | -0.5800072 |

|   |            |            |            |
|---|------------|------------|------------|
| H | 1.7489052  | 1.5621325  | 1.2399555  |
| C | 0.2471064  | -1.0492648 | 1.0259714  |
| H | 1.8797536  | -0.4144627 | -0.1278853 |
| H | -1.4234335 | -2.9739407 | 1.6772532  |
| H | -1.2712990 | 1.6671760  | -1.1522027 |
| H | -0.1344914 | 1.7051596  | -2.5186391 |
| H | 1.6983638  | 2.3274909  | -1.0856698 |
| C | -0.0936989 | -0.9932354 | -1.9640670 |
| O | 0.2980177  | -2.1005818 | -1.6153538 |
| C | -0.8437563 | -0.7627534 | -3.2448541 |
| H | -1.0537783 | -1.7262991 | -3.7030282 |
| H | -0.2461898 | -0.1613610 | -3.9349244 |
| H | -1.7795409 | -0.2291551 | -3.0646108 |
| O | 0.8968526  | -1.6962585 | 1.8067935  |
| O | -1.0781754 | -1.0548197 | 0.9673278  |
| C | -1.7360747 | -1.9471219 | 1.8695394  |
| H | -2.7997118 | -1.8309870 | 1.6771942  |
| H | -1.5030238 | -1.6849175 | 2.9021739  |
| N | 0.2306521  | 3.5664151  | -0.2117639 |
| N | 0.5579908  | 4.4866887  | -0.9420716 |
| N | 0.8061726  | 5.4060558  | -1.5417340 |

**Ac-(4S)Azp-OMe (3S-OMe) exo trans**

**Ψ =-34.9°, C<sup>δ</sup>-C<sup>γ</sup>-N-N torsion =-162.6°**

|   |            |            |            |
|---|------------|------------|------------|
| H | 0.0086244  | 1.4561578  | 1.3405530  |
| C | 0.8950071  | 1.3076215  | 0.7181442  |
| C | 0.8786627  | -0.0906944 | 0.0924433  |
| N | 0.1582114  | 0.1033993  | -1.1543549 |
| C | -0.1806931 | 1.4900275  | -1.4006224 |
| C | 0.7957416  | 2.2267869  | -0.4969183 |
| H | 1.7830878  | 1.4792159  | 1.3241433  |
| C | 0.2434149  | -1.0952945 | 1.0311056  |
| H | 1.8889567  | -0.4576796 | -0.1033055 |
| H | -1.4666755 | -3.0022734 | 1.6301382  |
| H | -1.2094002 | 1.7194389  | -1.0986091 |
| H | -0.0561527 | 1.7562954  | -2.4449676 |
| H | 1.7695177  | 2.3017753  | -0.9926515 |
| C | -0.0995473 | -0.9532561 | -1.9530497 |
| O | 0.2635462  | -2.0780241 | -1.6296108 |
| C | -0.8404406 | -0.6743632 | -3.2295290 |
| H | -1.0783301 | -1.6216674 | -3.7075159 |
| H | -0.2234383 | -0.0774908 | -3.9063256 |
| H | -1.7599482 | -0.1162989 | -3.0400247 |
| O | 0.8811415  | -1.7773857 | 1.7917788  |
| O | -1.0817748 | -1.0709286 | 0.9761218  |
| C | -1.7567261 | -1.9751103 | 1.8534959  |
| H | -2.8180372 | -1.8305940 | 1.6675927  |
| H | -1.5159395 | -1.7485740 | 2.8927863  |
| N | 0.2788325  | 3.5615820  | -0.1964978 |
| N | 1.0912441  | 4.3636227  | 0.2329382  |
| N | 1.7557687  | 5.1808134  | 0.6290281  |

**Ac-(4S)Azp-OMe (3S-OMe) exo trans**

**Ψ =-35.4°, C<sup>δ</sup>-C<sup>γ</sup>-N-N torsion =62.8°**

|   |            |            |            |
|---|------------|------------|------------|
| H | -0.0127449 | 1.4477355  | 1.3433416  |
| C | 0.8666753  | 1.3264015  | 0.7029479  |
| C | 0.8689546  | -0.0744644 | 0.0829704  |
| N | 0.1460452  | 0.1001016  | -1.1651051 |
| C | -0.2222584 | 1.4764871  | -1.4198827 |
| C | 0.7422677  | 2.2397185  | -0.5131029 |
| H | 1.7568319  | 1.5196401  | 1.2980386  |
| C | 0.2464120  | -1.0832998 | 1.0261116  |
| H | 1.8845844  | -0.4272451 | -0.1102744 |
| H | -1.4499771 | -3.0001022 | 1.6372526  |
| H | -1.2624395 | 1.6741516  | -1.1298182 |
| H | -0.0994615 | 1.7435705  | -2.4688072 |
| H | 1.7084633  | 2.3275793  | -1.0098978 |
| C | -0.0932896 | -0.9674277 | -1.9574954 |
| O | 0.2897867  | -2.0823908 | -1.6249471 |
| C | -0.8390139 | -0.7106510 | -3.2354852 |
| H | -1.0559605 | -1.6649965 | -3.7093635 |
| H | -0.2352228 | -0.1030230 | -3.9145687 |
| H | -1.7708276 | -0.1724090 | -3.0484596 |
| O | 0.8917219  | -1.7575862 | 1.7869360  |
| O | -1.0792146 | -1.0689817 | 0.9743838  |
| C | -1.7456660 | -1.9739467 | 1.8577320  |
| H | -2.8084448 | -1.8365523 | 1.6750034  |

|   |            |            |            |
|---|------------|------------|------------|
| H | -1.5025134 | -1.7416685 | 2.8951671  |
| N | 0.3447167  | 3.6180095  | -0.2274129 |
| N | -0.7053962 | 3.7656113  | 0.3775195  |
| N | -1.6524612 | 4.0182900  | 0.9311097  |

## 5. Torsion Potential of Methyl esters and Dimethylamides of Proline Derivatives

The absolute and local energy minima of the *endo* and *exo* puckered *cis* and *trans* conformers of Ac-Pro-OMe (**1-OMe**) and Ac-Pro-NMe<sub>2</sub> (**1-NMe<sub>2</sub>**) were confirmed by determining the torsion potential of the  $\psi$ -angle in the gas phase by constrained geometry optimization (relaxed scan) at the PBE0-D3/def2-TZVP level of theory.

### 5.1. Ac-Pro-OMe (1-OMe) - *trans-endo*

**Table 14** Torsion potential of the  $\psi$ -angle in the *trans-endo* conformation of Ac-Pro-OMe (**1-OMe**). Calculated in the gas phase by constrained geometry optimization (relaxed scan) at the PBE0-D3/def2-TZVP level of theory.

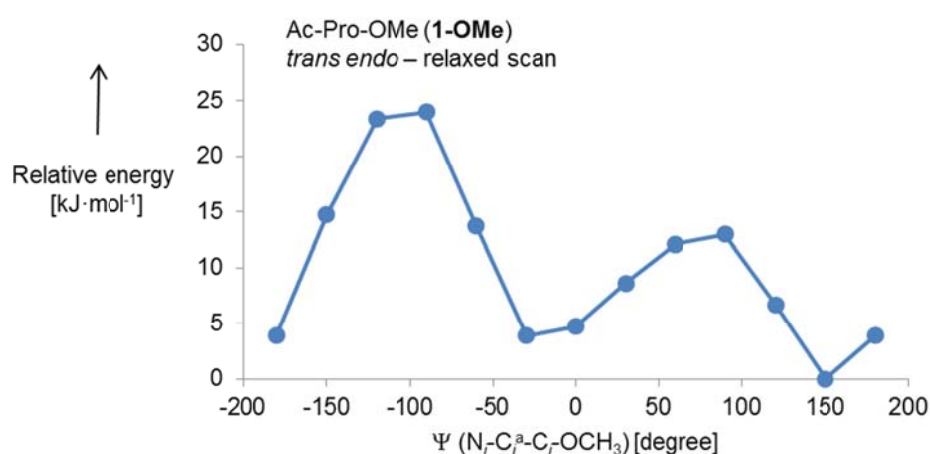

| Ac-Pro-OMe <i>trans-endo</i> – relaxed scan                                                      |                                                          |
|--------------------------------------------------------------------------------------------------|----------------------------------------------------------|
| $\Psi$ (N <sub>r</sub> -C <sub>i</sub> <sup>α</sup> -C <sub>r</sub> -OCH <sub>3</sub> ) [degree] | relative energy E <sub>rel</sub> [kJ·mol <sup>-1</sup> ] |
| -180                                                                                             | 3.9                                                      |
| -150                                                                                             | 14.7                                                     |
| -120                                                                                             | 23.4                                                     |
| -90                                                                                              | 24                                                       |
| -60                                                                                              | 13.7                                                     |
| -30                                                                                              | 3.9                                                      |
| 0                                                                                                | 4.7                                                      |
| 30                                                                                               | 8.6                                                      |
| 60                                                                                               | 12.1                                                     |
| 90                                                                                               | 13                                                       |
| 120                                                                                              | 6.7                                                      |
| 150                                                                                              | 0                                                        |
| 180                                                                                              | 3.9                                                      |

## 5.2. Ac-Pro-OMe (1-OMe) - *cis-endo*

**Table 15** Torsion potential of the  $\psi$ -angle in the *cis-endo* conformation of Ac-Pro-OMe (**1-OMe**). Calculated in the gas phase by constrained geometry optimization (relaxed scan) at the PBE0-D3/def2-TZVP level of theory.

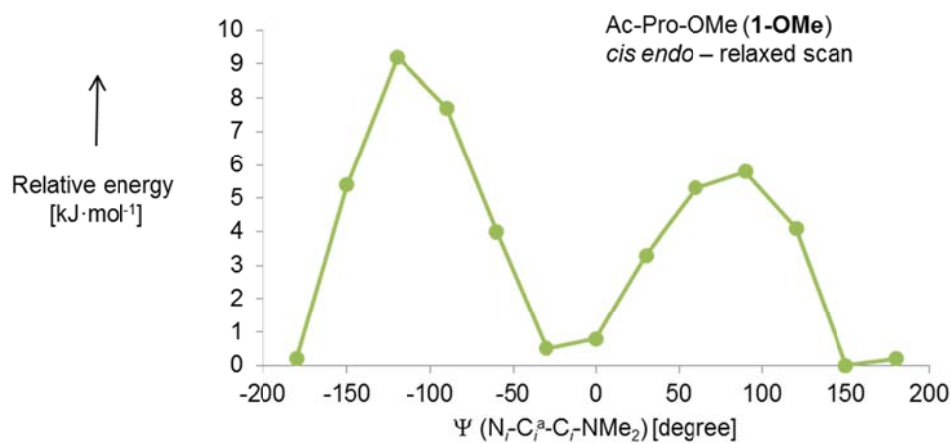

**Ac-Pro-OMe *cis-endo* – relaxed scan**

| $\Psi$ (N-C <sub>i</sub> <sup>a</sup> -C <sub>r</sub> -OCH <sub>3</sub> )<br>[degree] | relative energy $E_{rel}$<br>[kJ·mol <sup>-1</sup> ] |
|---------------------------------------------------------------------------------------|------------------------------------------------------|
| -180                                                                                  | 0.2                                                  |
| -150                                                                                  | 5.4                                                  |
| -120                                                                                  | 9.2                                                  |
| -90                                                                                   | 7.7                                                  |
| -60                                                                                   | 4                                                    |
| -30                                                                                   | 0.5                                                  |
| 0                                                                                     | 0.8                                                  |
| 30                                                                                    | 3.3                                                  |
| 60                                                                                    | 5.3                                                  |
| 90                                                                                    | 5.8                                                  |
| 120                                                                                   | 4.1                                                  |
| 150                                                                                   | 0                                                    |
| 180                                                                                   | 0.2                                                  |

### 5.3. Ac-Pro-NMe<sub>2</sub> (1-NMe<sub>2</sub>)- *trans-endo*

**Table 16** Torsion potential of the  $\psi$ -angle in the *trans-endo* conformation of Ac-Pro-NMe<sub>2</sub> (1-NMe<sub>2</sub>). Calculated in the gas phase by constrained geometry optimization (relaxed scan) at the PBE0-D3/def2-TZVP level of theory. **Note:** The structure at  $\Psi = -30^\circ$  was confirmed to be a minimum by vibrational frequency calculations.

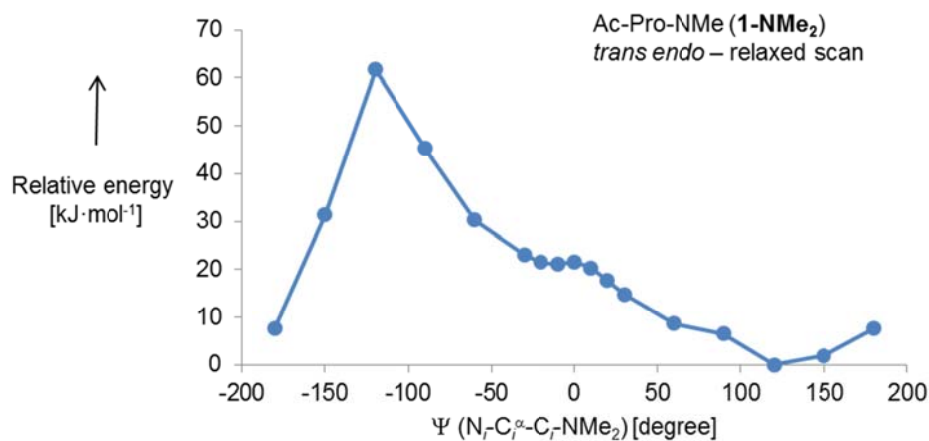

Ac-Pro-NMe<sub>2</sub> (1-NMe<sub>2</sub>) *trans-endo*- relaxed scan

| $\Psi$ (N <sub>r</sub> -C <sub>i</sub> <sup>a</sup> -C <sub>r</sub> -OCH <sub>3</sub> )<br>[degree] | relative energy $E_{\text{rel}}$<br>[kJ·mol <sup>-1</sup> ] |
|-----------------------------------------------------------------------------------------------------|-------------------------------------------------------------|
| -180                                                                                                | 7.6                                                         |
| -150                                                                                                | 31.3                                                        |
| -120                                                                                                | 61.8                                                        |
| -90                                                                                                 | 45.4                                                        |
| -60                                                                                                 | 30.3                                                        |
| -30                                                                                                 | 23                                                          |
| -20                                                                                                 | 21.5                                                        |
| -10                                                                                                 | 21.1                                                        |
| 0                                                                                                   | 21.6                                                        |
| 10                                                                                                  | 20.3                                                        |
| 20                                                                                                  | 17.7                                                        |
| 30                                                                                                  | 14.8                                                        |
| 60                                                                                                  | 8.7                                                         |
| 90                                                                                                  | 6.5                                                         |
| 120                                                                                                 | 0                                                           |
| 150                                                                                                 | 1.9                                                         |
| 180                                                                                                 | 7.6                                                         |

## 5.4. Ac-Pro-NMe<sub>2</sub> (1-NMe<sub>2</sub>)- *cis-endo*

**Table 17** Torsion potential of the  $\psi$ -angle in the *cis-endo* conformation of Ac-Pro-NMe<sub>2</sub> (1-NMe<sub>2</sub>). Calculated in the gas phase by constrained geometry optimization (relaxed scan) at the PBE0-D3/def2-TZVP level of theory.

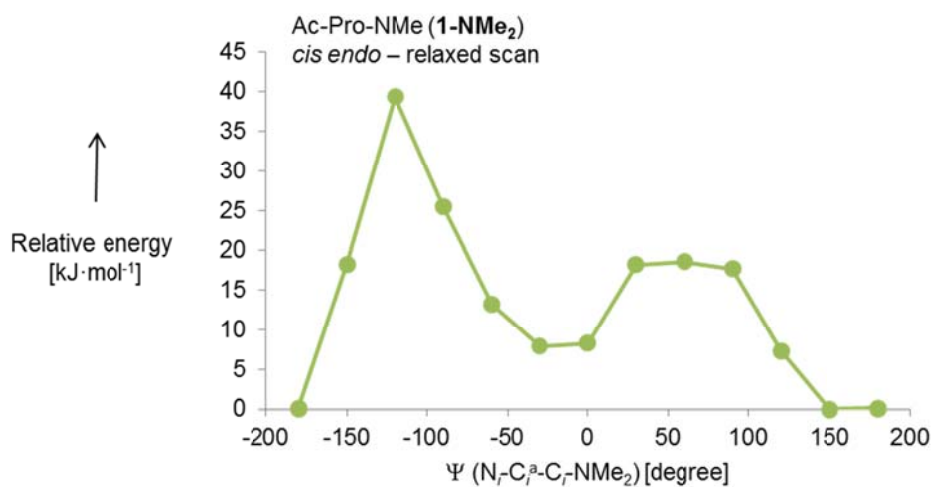

**Ac-Pro-NMe<sub>2</sub> *cis-endo* - relaxed scan**

| $\Psi$ (N <sub>r</sub> -C <sub>i</sub> <sup>a</sup> -C <sub>r</sub> -OCH <sub>3</sub> ) [degree] | relative energy E <sub>rel</sub> [kJ·mol <sup>-1</sup> ] |
|--------------------------------------------------------------------------------------------------|----------------------------------------------------------|
| -180                                                                                             | 0.1                                                      |
| -150                                                                                             | 18.3                                                     |
| -120                                                                                             | 39.4                                                     |
| -90                                                                                              | 25.5                                                     |
| -60                                                                                              | 13.2                                                     |
| -30                                                                                              | 7.9                                                      |
| 0                                                                                                | 8.3                                                      |
| 30                                                                                               | 18.2                                                     |
| 60                                                                                               | 18.6                                                     |
| 90                                                                                               | 17.7                                                     |
| 120                                                                                              | 7.3                                                      |
| 150                                                                                              | 0.0                                                      |
| 180                                                                                              | 0.1                                                      |



## 5.5. Torsion Potential of the Azide Substituent in Ac-(4*R*)Azp-OMe (3*R*-OMe) and Ac-(4*S*)Azp-OMe (3*S*-OMe)

The torsion potential of the C<sup>δ</sup>-C<sup>γ</sup>-N-N torsion angle was determined by constrained geometry optimization (relaxed scan) at the PBE0-D3/def2-TZVP level of theory.

### 5.5.1. Ac-(4*R*)Azp-OMe (3*R*-OMe) - *trans-exo*

**Table 18** Potential of the the C<sup>δ</sup>-C<sup>γ</sup>-N-N torsion angle in the *trans-exo* conformation of Ac-(4*R*)Azp-OMe (3*R*-OMe). Calculated in the gas phase by constrained geometry optimization (relaxed scan) at the PBE0-D3/def2-TZVP level of theory.

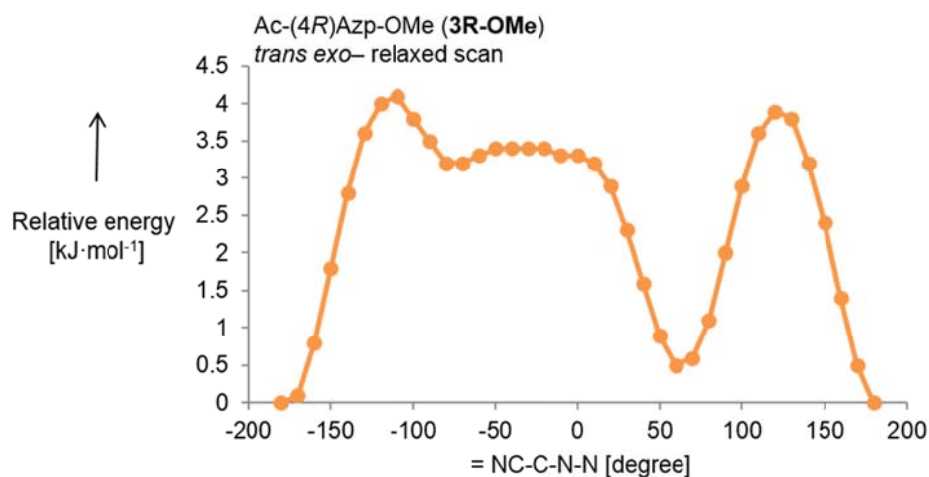

| Ac-(4 <i>R</i> )Azp-OMe (3 <i>R</i> -OMe) <i>trans-exo</i> - relaxed scan |                                                          |
|---------------------------------------------------------------------------|----------------------------------------------------------|
| C <sup>δ</sup> -C <sup>γ</sup> -N-N torsion [degree]                      | relative energy E <sub>rel</sub> [kJ·mol <sup>-1</sup> ] |
| -180                                                                      | 0                                                        |
| -170                                                                      | 0.1                                                      |
| -160                                                                      | 0.8                                                      |
| -150                                                                      | 1.8                                                      |
| -140                                                                      | 2.8                                                      |
| -130                                                                      | 3.6                                                      |
| -120                                                                      | 4                                                        |
| -110                                                                      | 4.1                                                      |
| -100                                                                      | 3.8                                                      |
| -90                                                                       | 3.5                                                      |
| -80                                                                       | 3.2                                                      |
| -70                                                                       | 3.2                                                      |
| -60                                                                       | 3.3                                                      |
| -50                                                                       | 3.4                                                      |
| -40                                                                       | 3.4                                                      |
| -30                                                                       | 3.4                                                      |
| -20                                                                       | 3.4                                                      |
| -10                                                                       | 3.3                                                      |
| 0                                                                         | 3.3                                                      |
| 10                                                                        | 3.2                                                      |
| 20                                                                        | 2.9                                                      |
| 30                                                                        | 2.3                                                      |
| 40                                                                        | 1.6                                                      |

|      |     |
|------|-----|
| 50   | 0.9 |
| 60   | 0.5 |
| 70   | 0.6 |
| 80   | 1.1 |
| 90   | 2   |
| 100  | 2.9 |
| 110  | 3.6 |
| 120  | 3.9 |
| 130  | 3.8 |
| 140  | 3.2 |
| 150  | 2.4 |
| 160  | 1.4 |
| 170  | 0.5 |
| 180  | 0   |
| -180 | 0   |
| -170 | 0.1 |

## 5.5.2. Ac-(4S)Azp-OMe (3S-OMe)- *trans-endo*

**Table 19** Potential of the the  $C^\delta-C^\gamma-N-N$  torsion angle in the *trans-endo* conformation of Ac-(4S)Azp-OMe (**3S-OMe**). Calculated in the gas phase by constrained geometry optimization (relaxed scan) at the PBE0-D3/def2-TZVP level of theory. **Note:** Data points between 50°-70° were excluded since the system prefers to convert from the *endo* to *exo* conformation, which are considered separately.

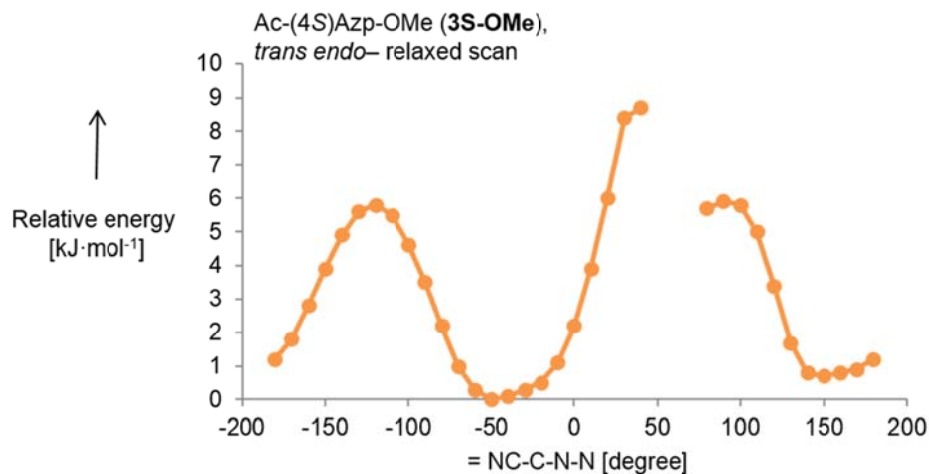

**Ac-(4S)Azp-OMe (3S-OMe) *trans-endo*- relaxed scan**

| $C^\delta-C^\gamma-N-N$ torsion [degree] | relative energy $E_{rel}$ [kJ·mol <sup>-1</sup> ] |
|------------------------------------------|---------------------------------------------------|
| -180                                     | 1.2                                               |
| -170                                     | 1.8                                               |
| -160                                     | 2.8                                               |
| -150                                     | 3.9                                               |
| -140                                     | 4.9                                               |
| -130                                     | 5.6                                               |
| -120                                     | 5.8                                               |
| -110                                     | 5.5                                               |
| -100                                     | 4.6                                               |
| -90                                      | 3.5                                               |
| -80                                      | 2.2                                               |
| -70                                      | 1                                                 |
| -60                                      | 0.3                                               |
| -50                                      | 0                                                 |
| -40                                      | 0.1                                               |
| -30                                      | 0.3                                               |
| -20                                      | 0.5                                               |
| -10                                      | 1.1                                               |
| 0                                        | 2.2                                               |
| 10                                       | 3.9                                               |
| 20                                       | 6                                                 |
| 30                                       | 8.4                                               |
| 40                                       | 8.7                                               |
| 50                                       |                                                   |
| 60                                       |                                                   |
| 70                                       |                                                   |
| 80                                       | 5.7                                               |
| 90                                       | 5.9                                               |
| 100                                      | 5.8                                               |

|      |     |
|------|-----|
| 110  | 5   |
| 120  | 3.4 |
| 130  | 1.7 |
| 140  | 0.8 |
| 150  | 0.7 |
| 160  | 0.8 |
| 170  | 0.9 |
| 180  | 1.2 |
| -180 | 1.2 |
| -170 | 1.8 |

## 6. NMR Spectra

### 6.1. Ac-Pro-OMe (1-OMe) 80mM in D<sub>2</sub>O

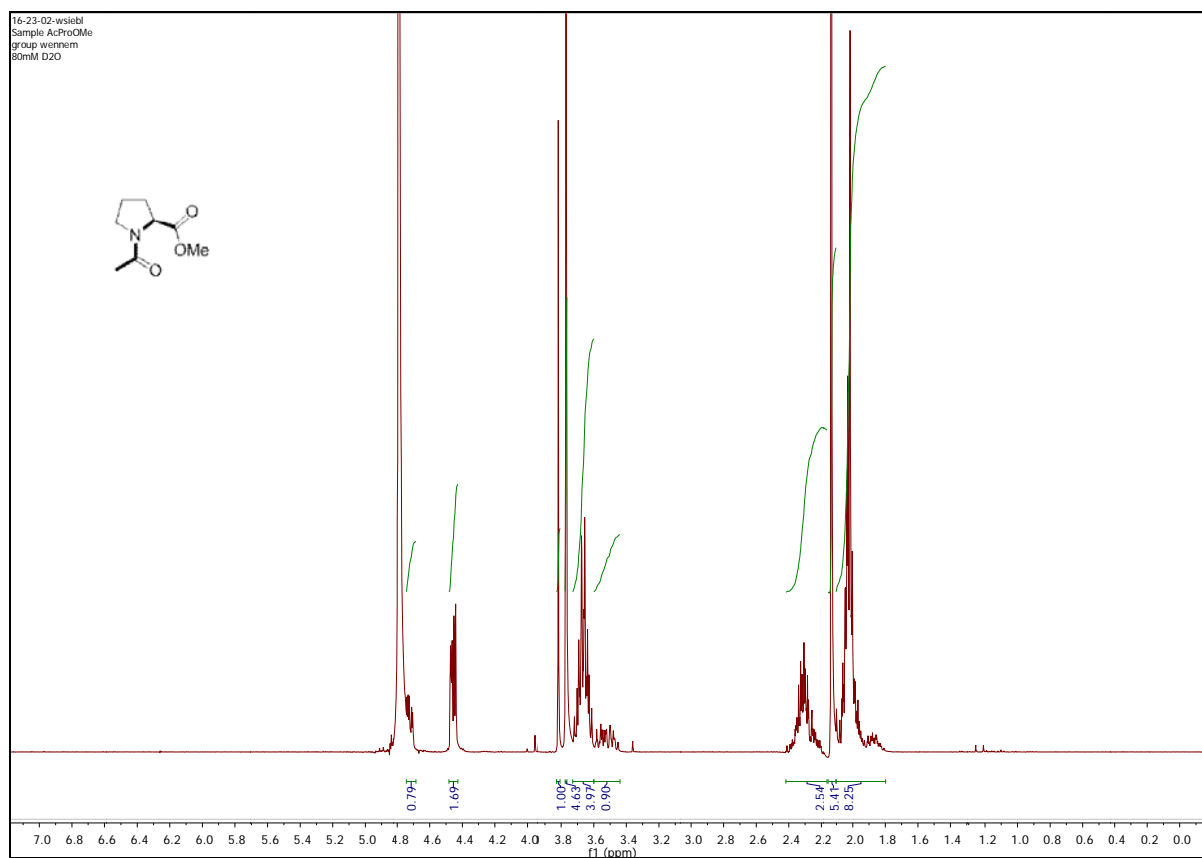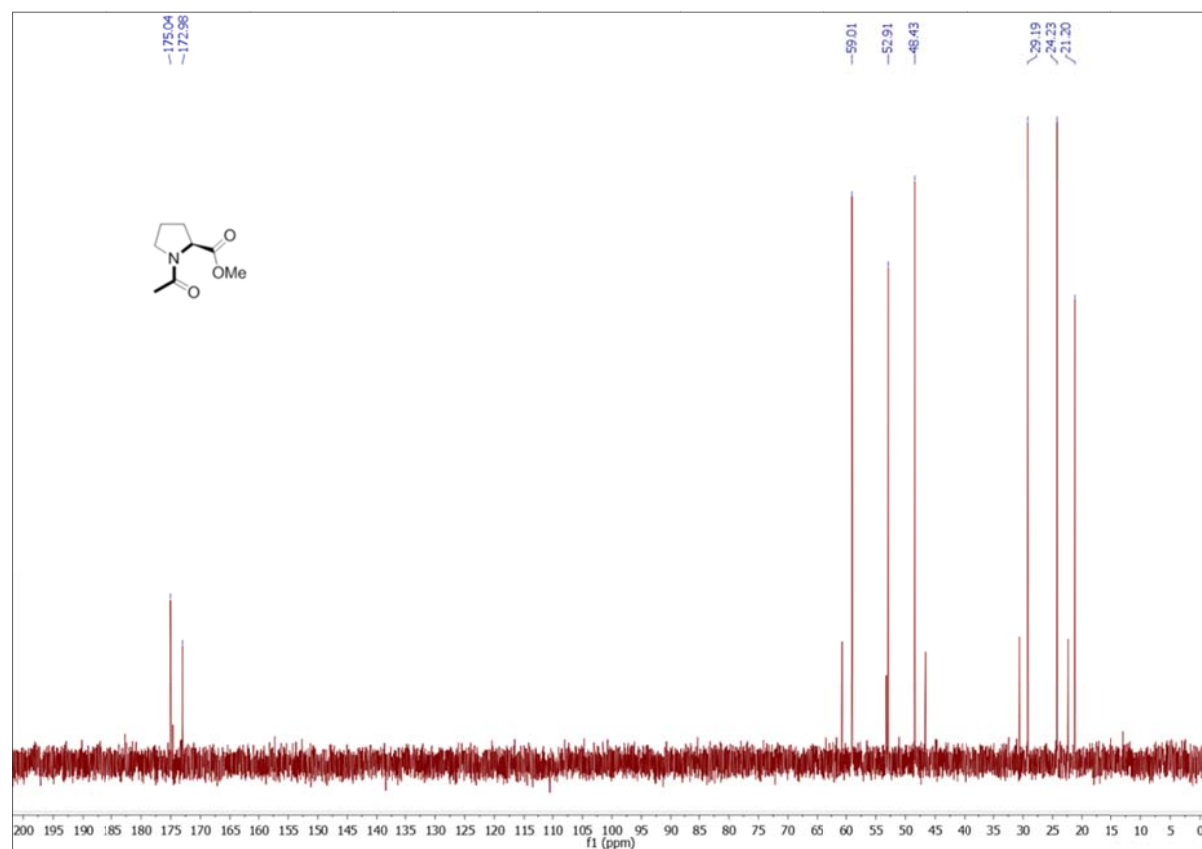

## 6.2. Ac-Pro-OMe (1-OMe) 80mM in CDCl<sub>3</sub>

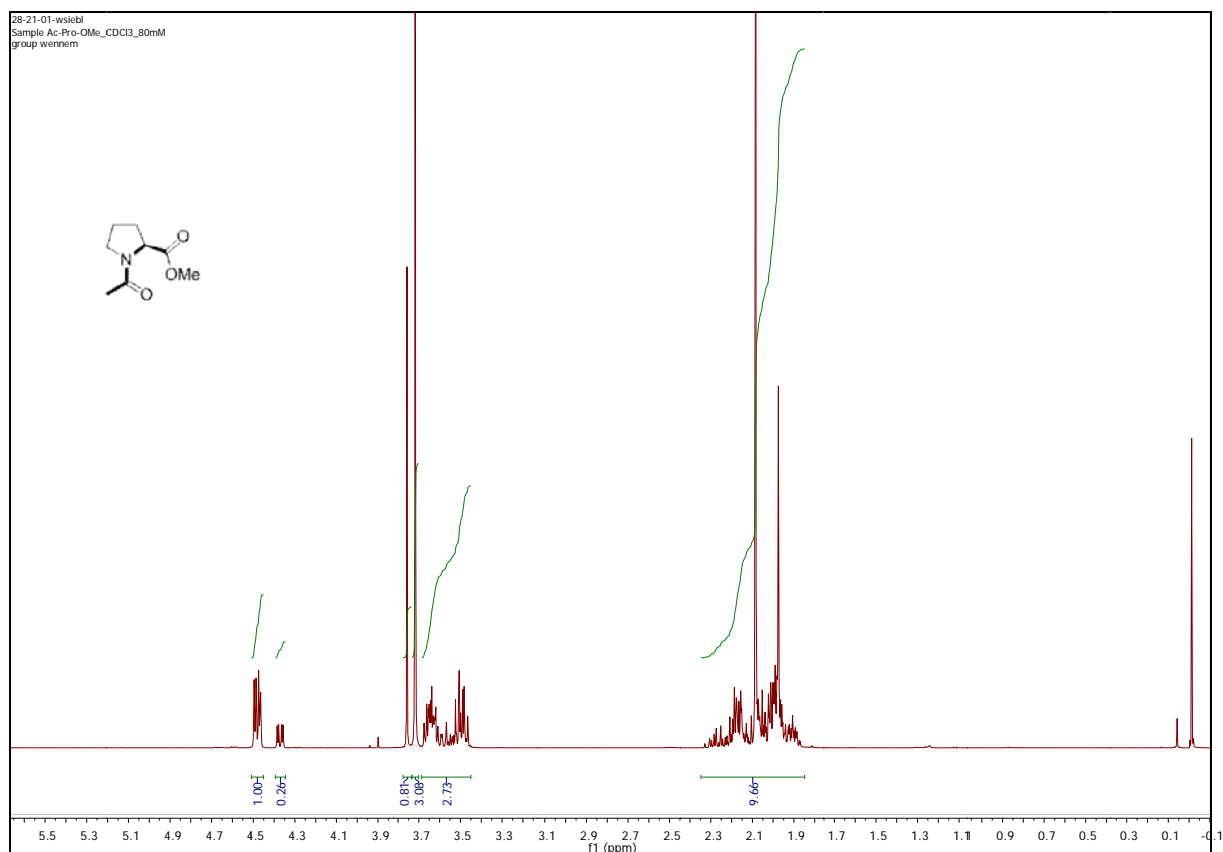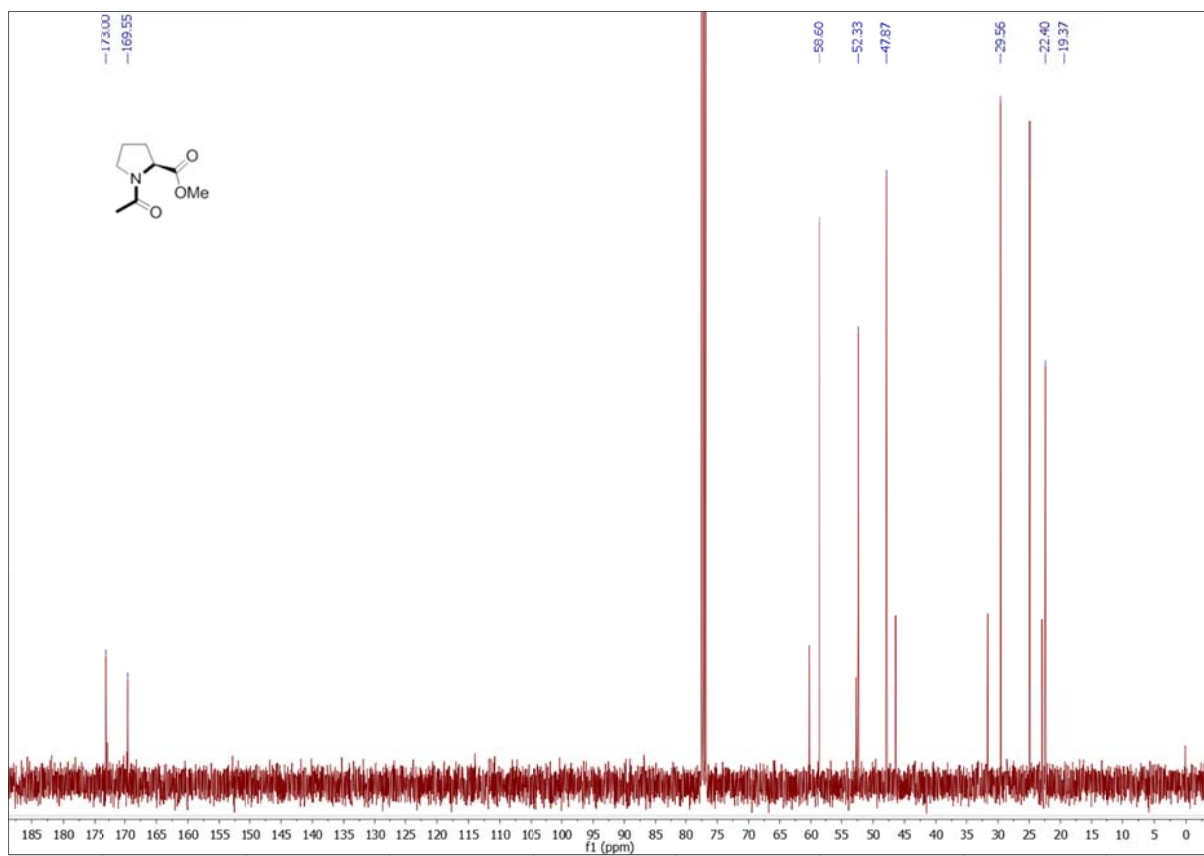

### 6.3. Ac-Pro-OMe (1-OMe) 80mM in DMSO-d6

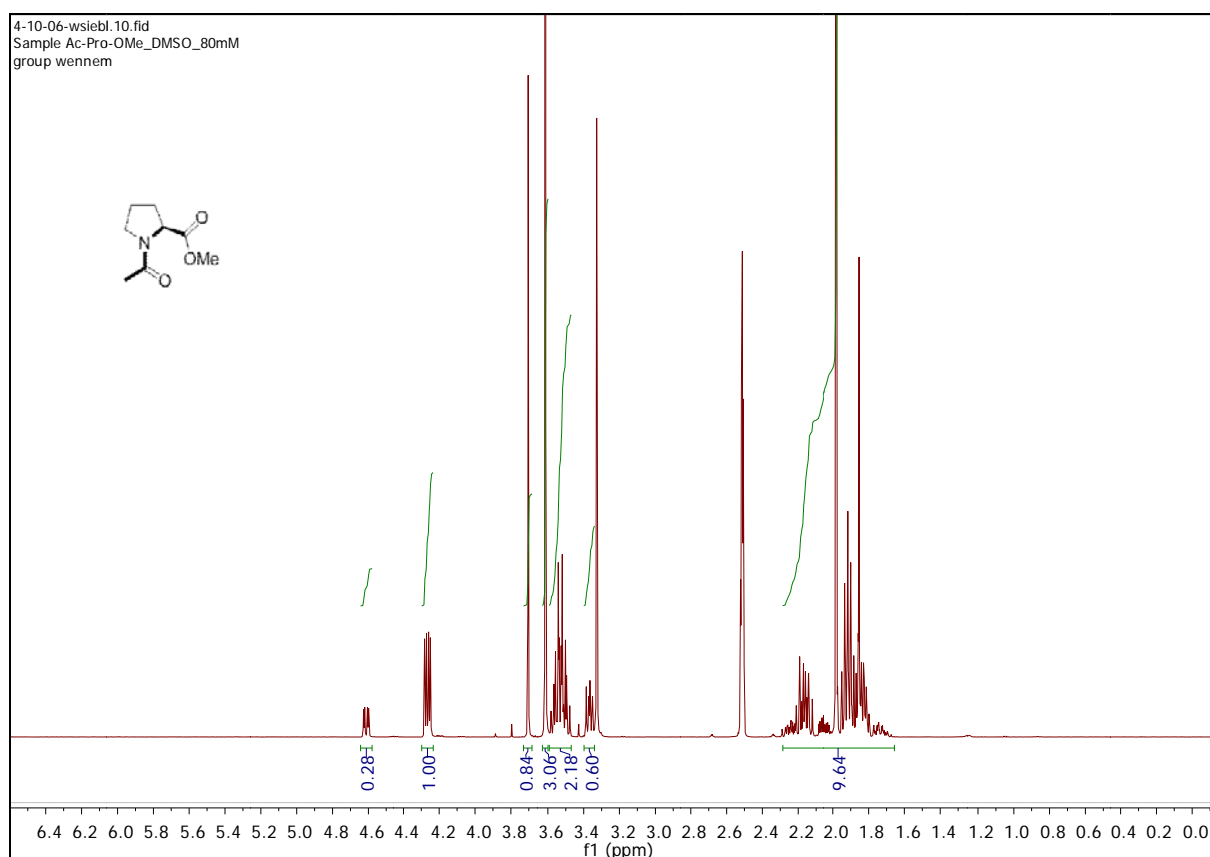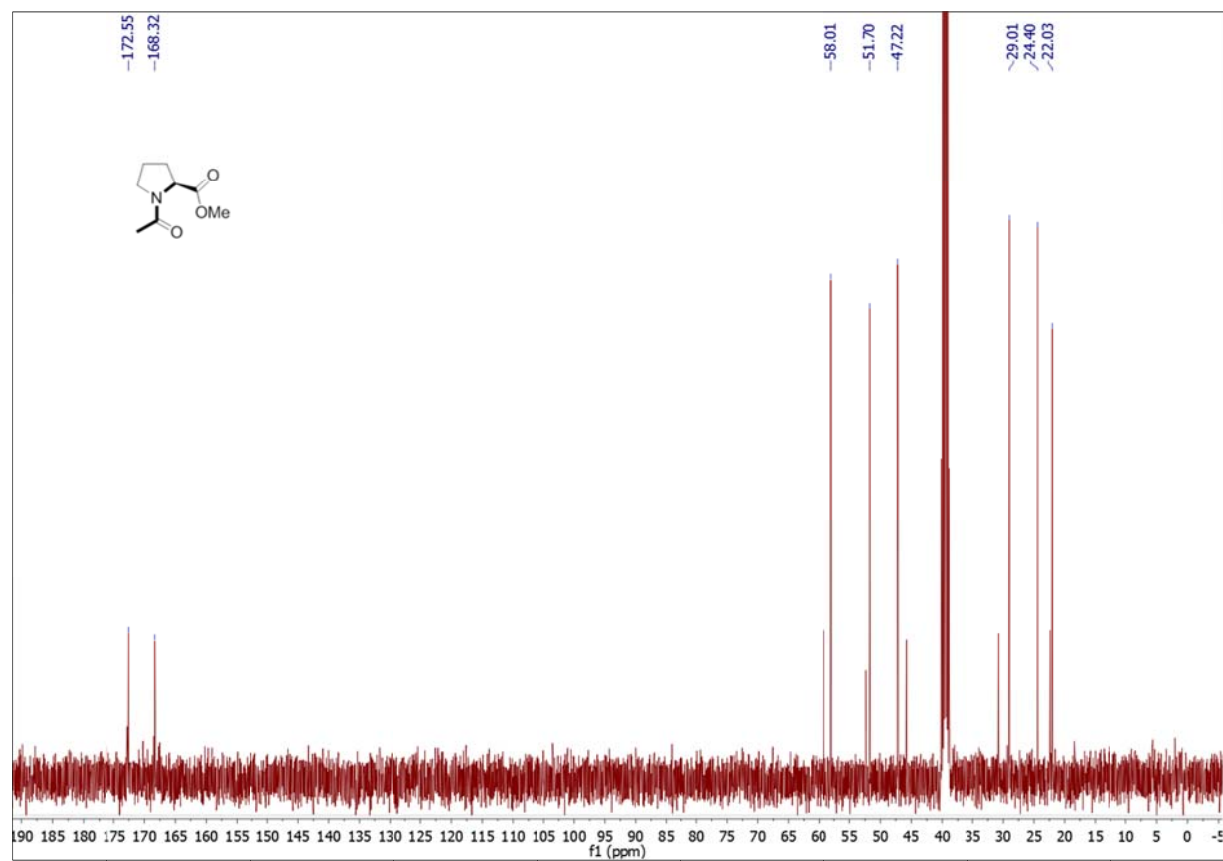

## 6.4. Ac-Pro-OMe (1-OMe) 80mM in dioxane-d8

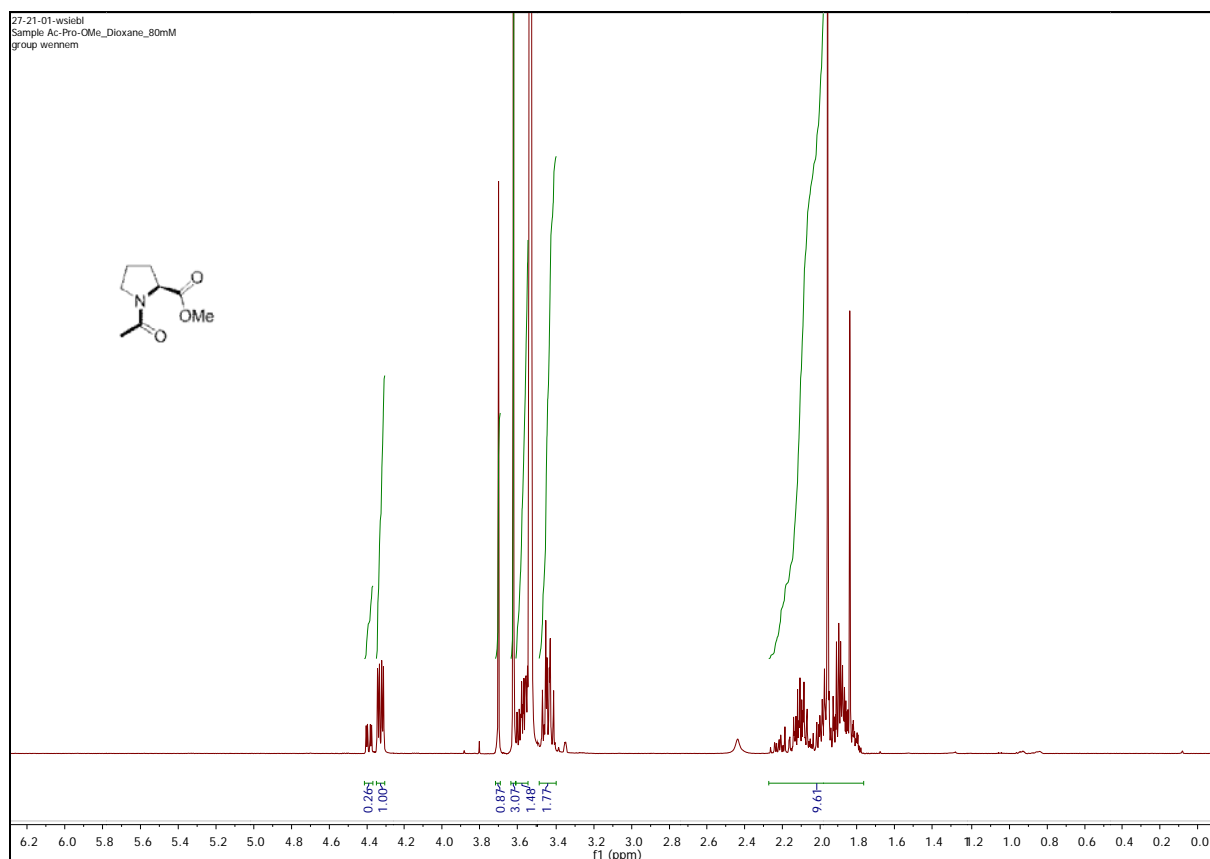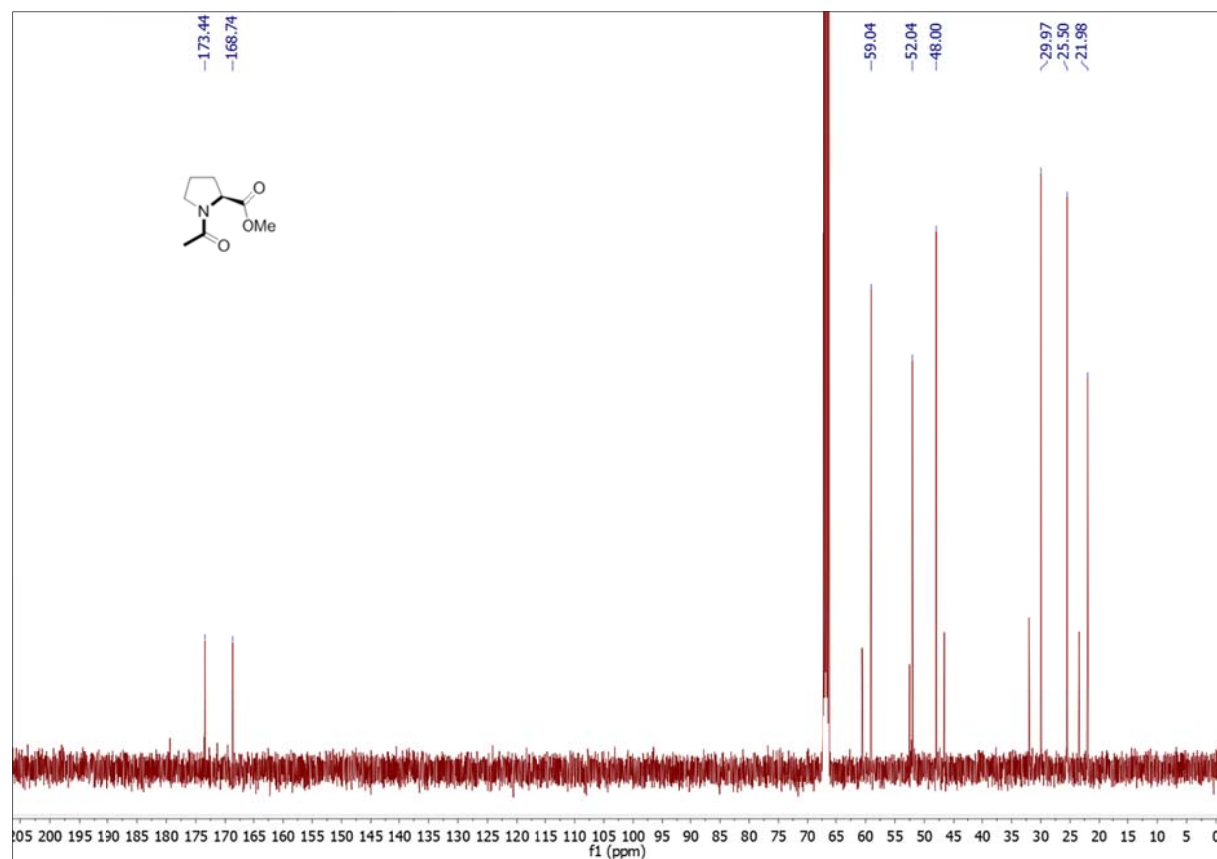



### 6.5. Ac-Pro-NMe<sub>2</sub> (1- NMe<sub>2</sub>) 80mM in D<sub>2</sub>O

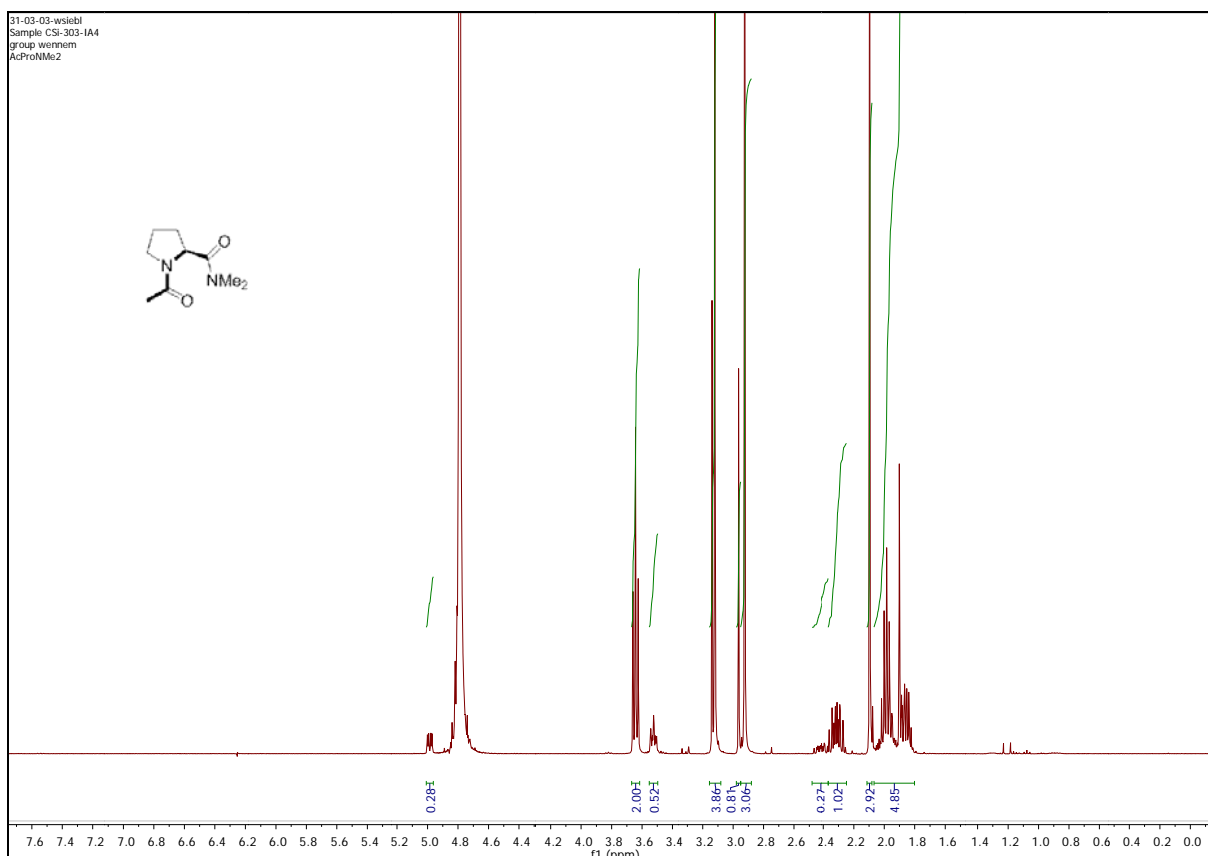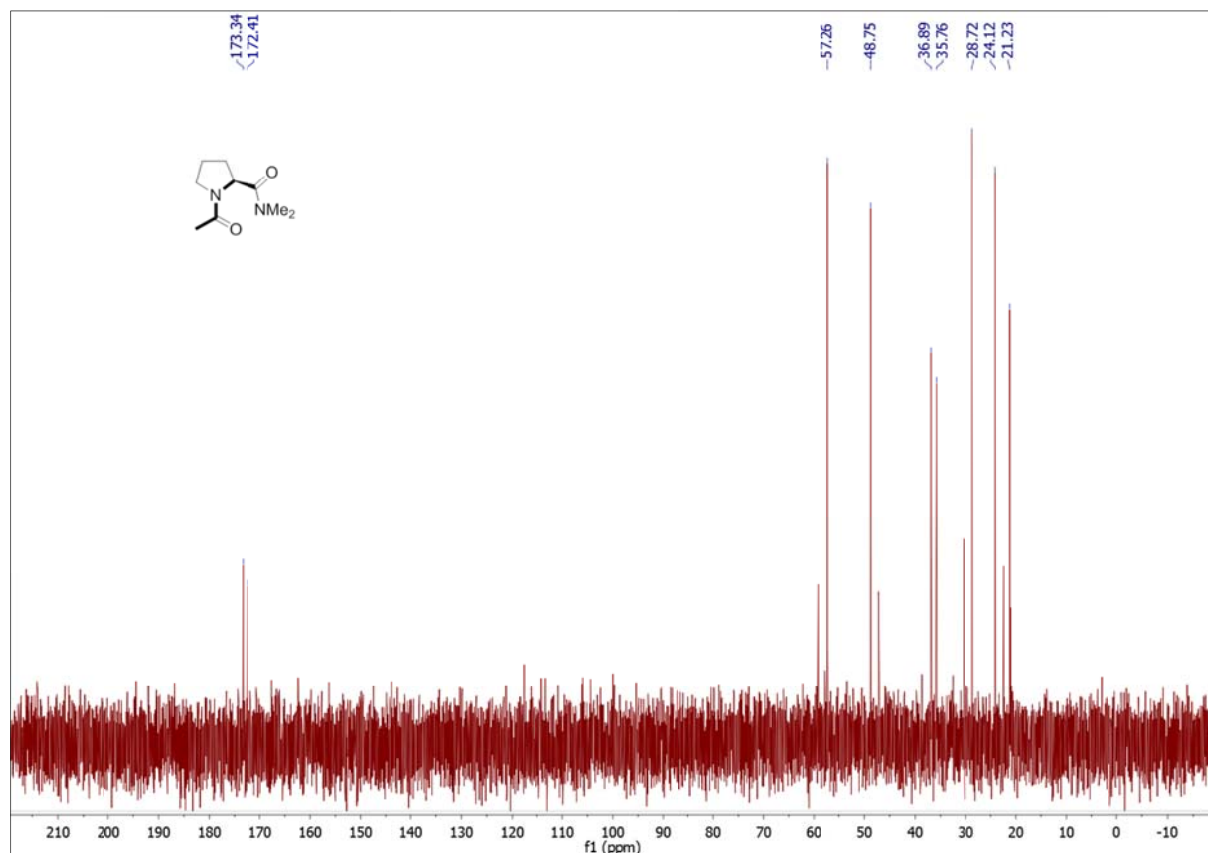

## 6.6. Ac-Pro-NMe<sub>2</sub> (1- NMe<sub>2</sub>) 80mM in CDCl<sub>3</sub>

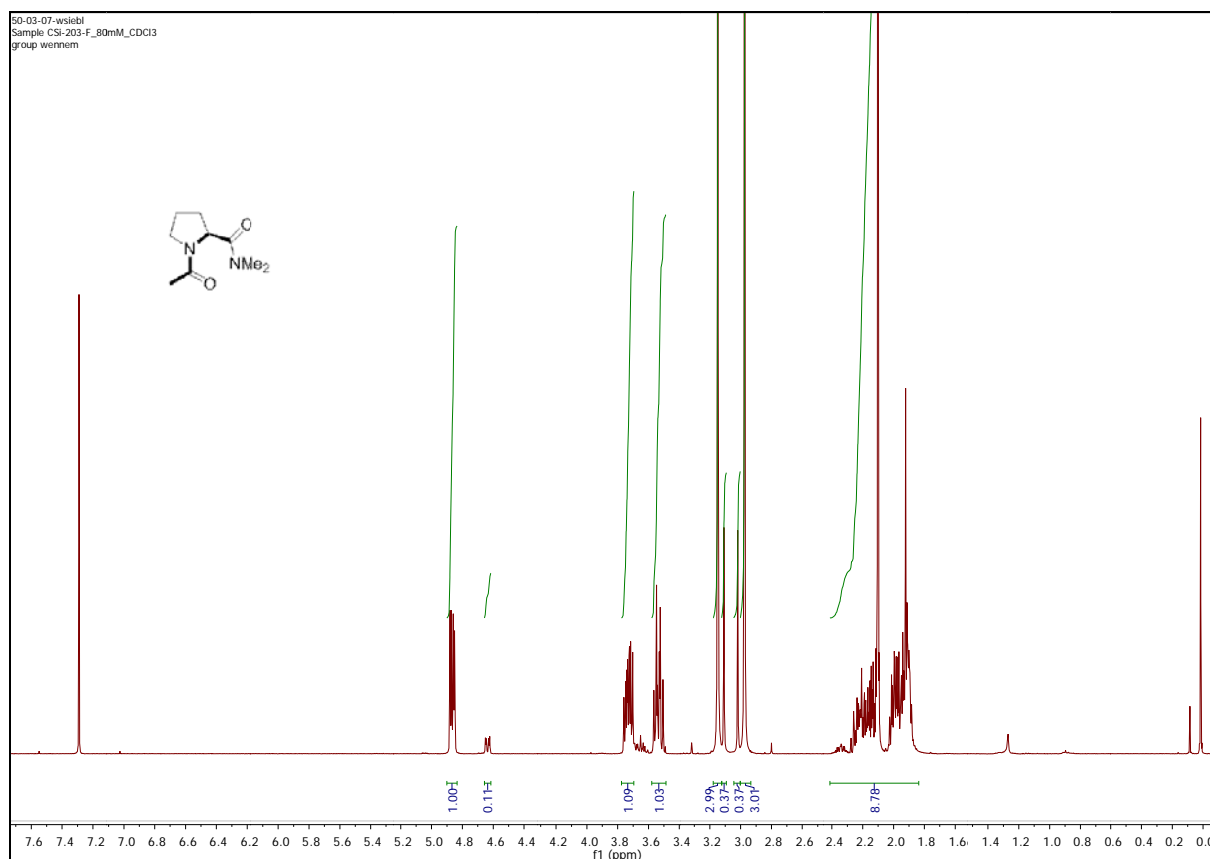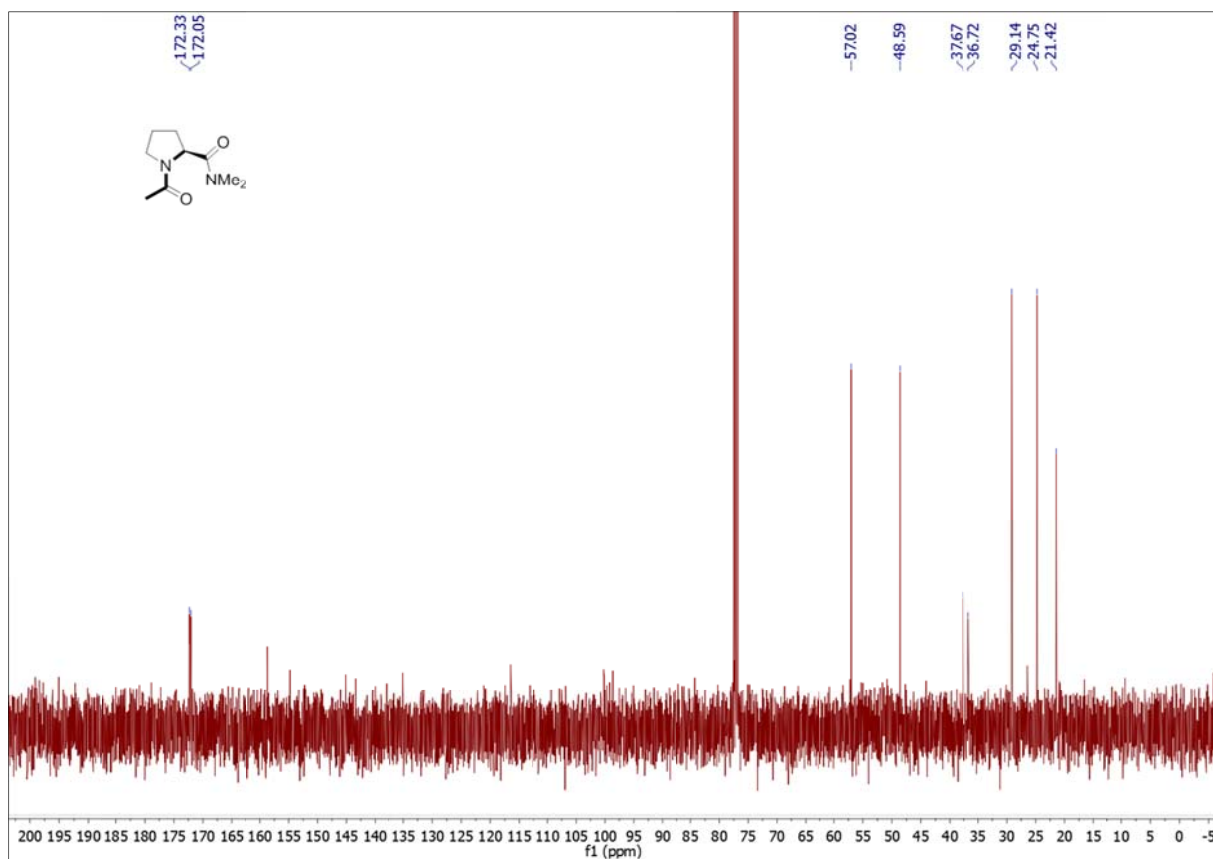

## 6.7. Ac-Pro-NMe<sub>2</sub> (1- NMe<sub>2</sub>) 80mM in DMSO-d<sub>6</sub>

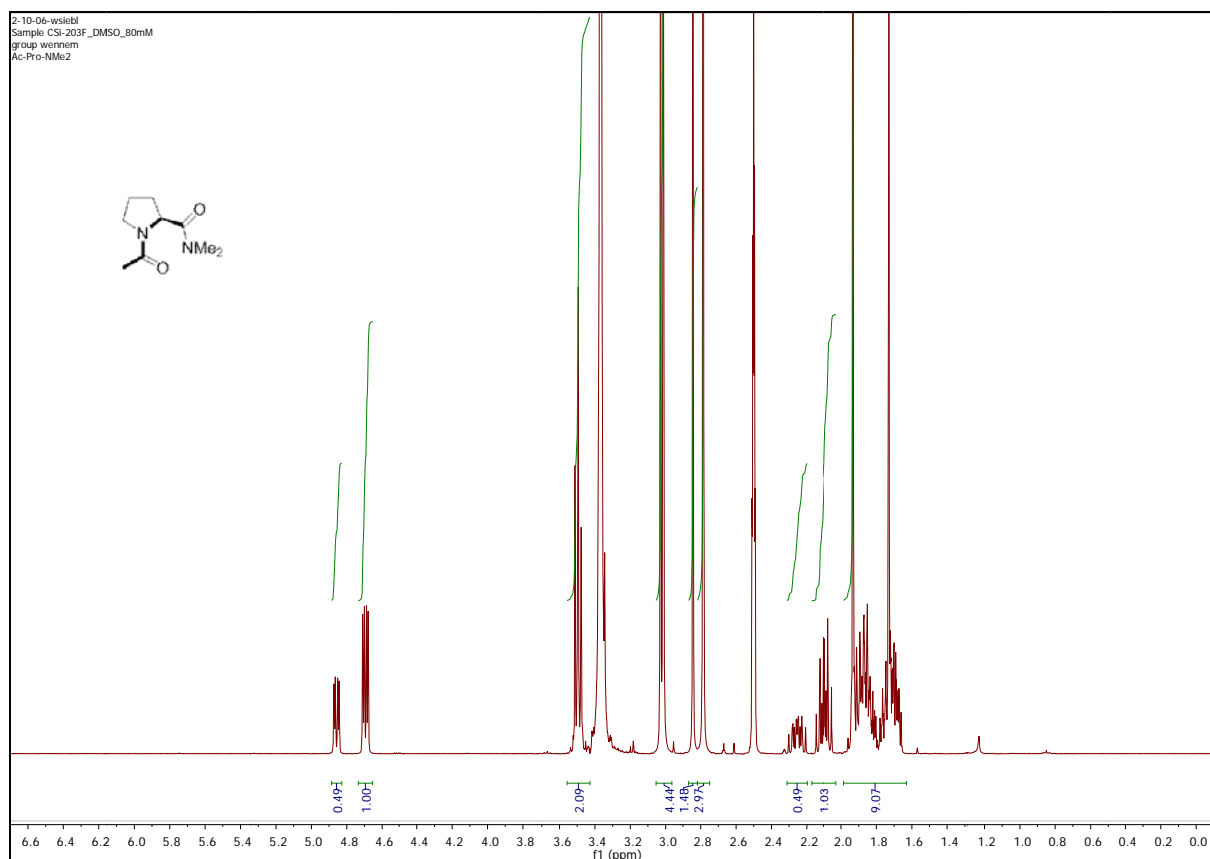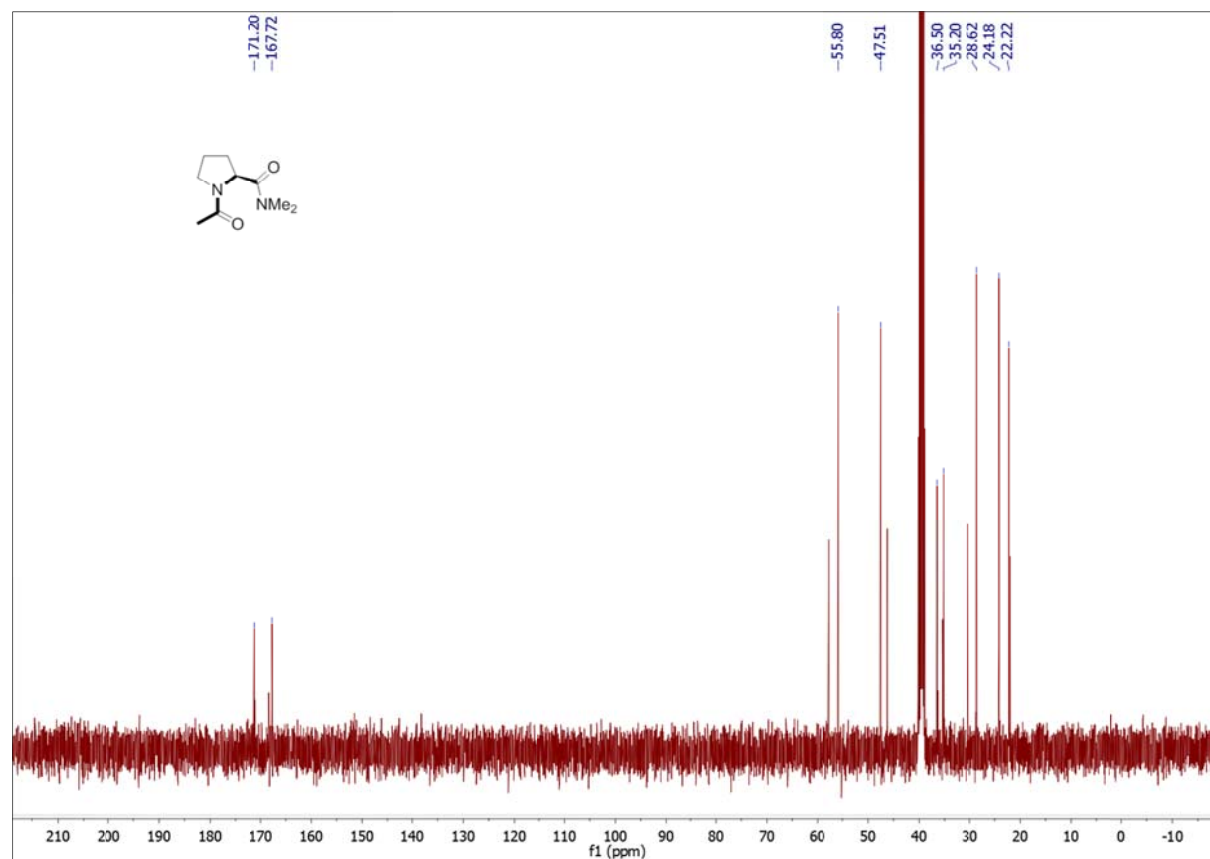

## 6.8. Ac-Pro-NMe<sub>2</sub> (1- NMe<sub>2</sub>) 80mM in dioxane-d<sub>8</sub>

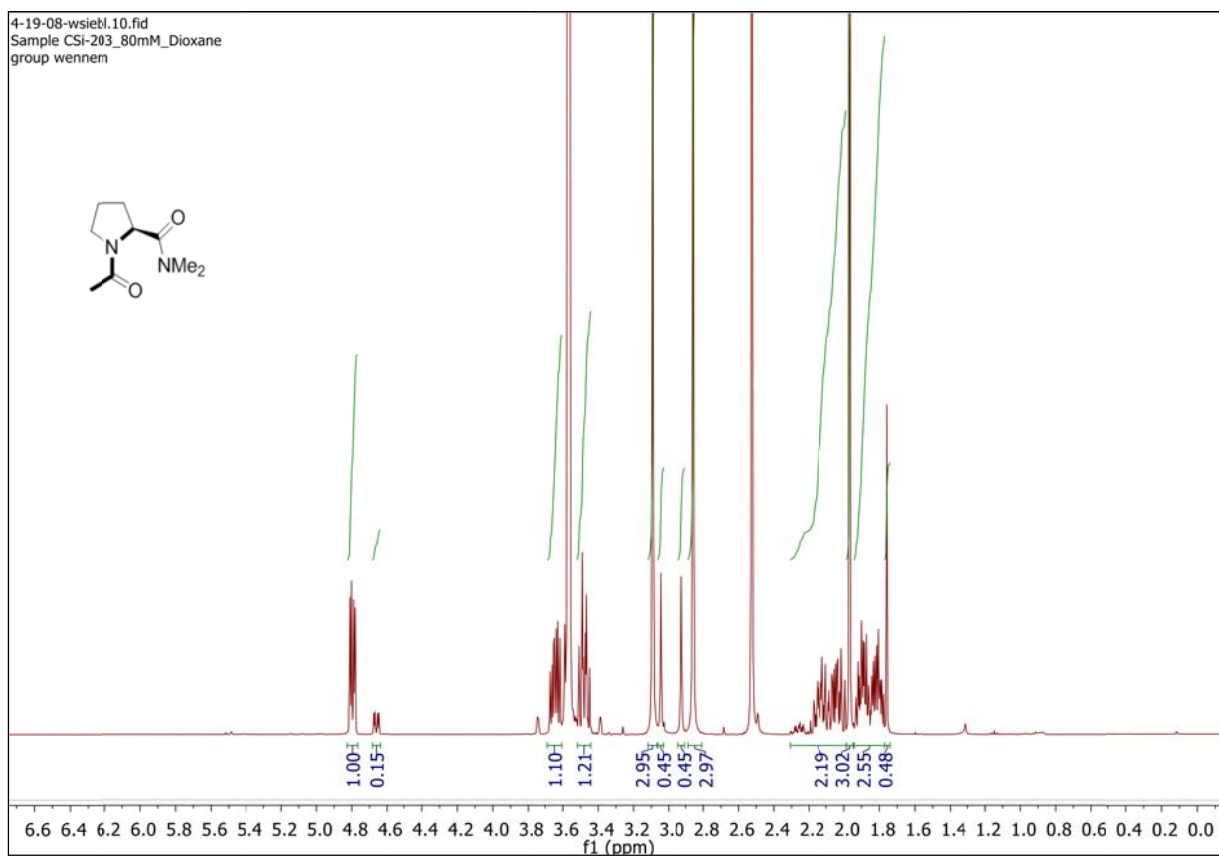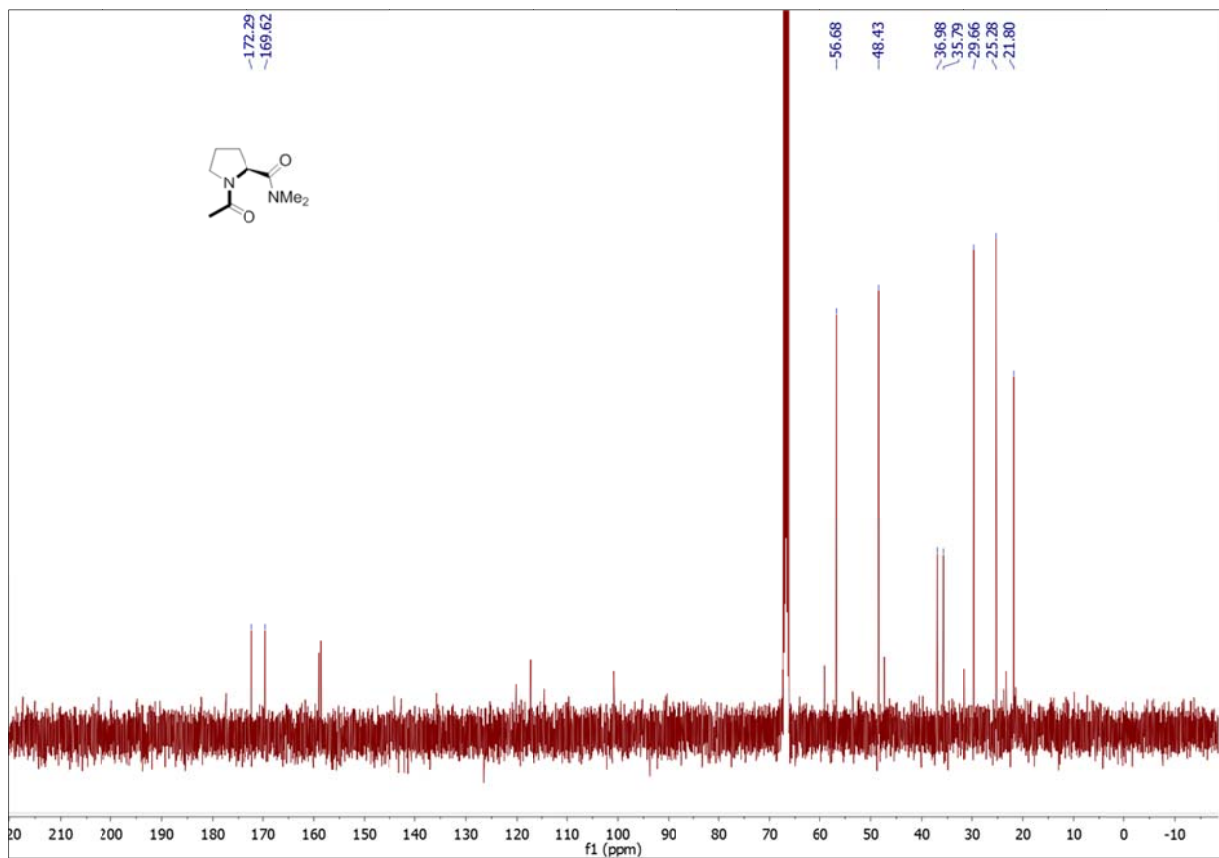

## 6.9. Ac-(4*R*)Flp-OMe (2*R*-OMe) 80mM in D<sub>2</sub>O

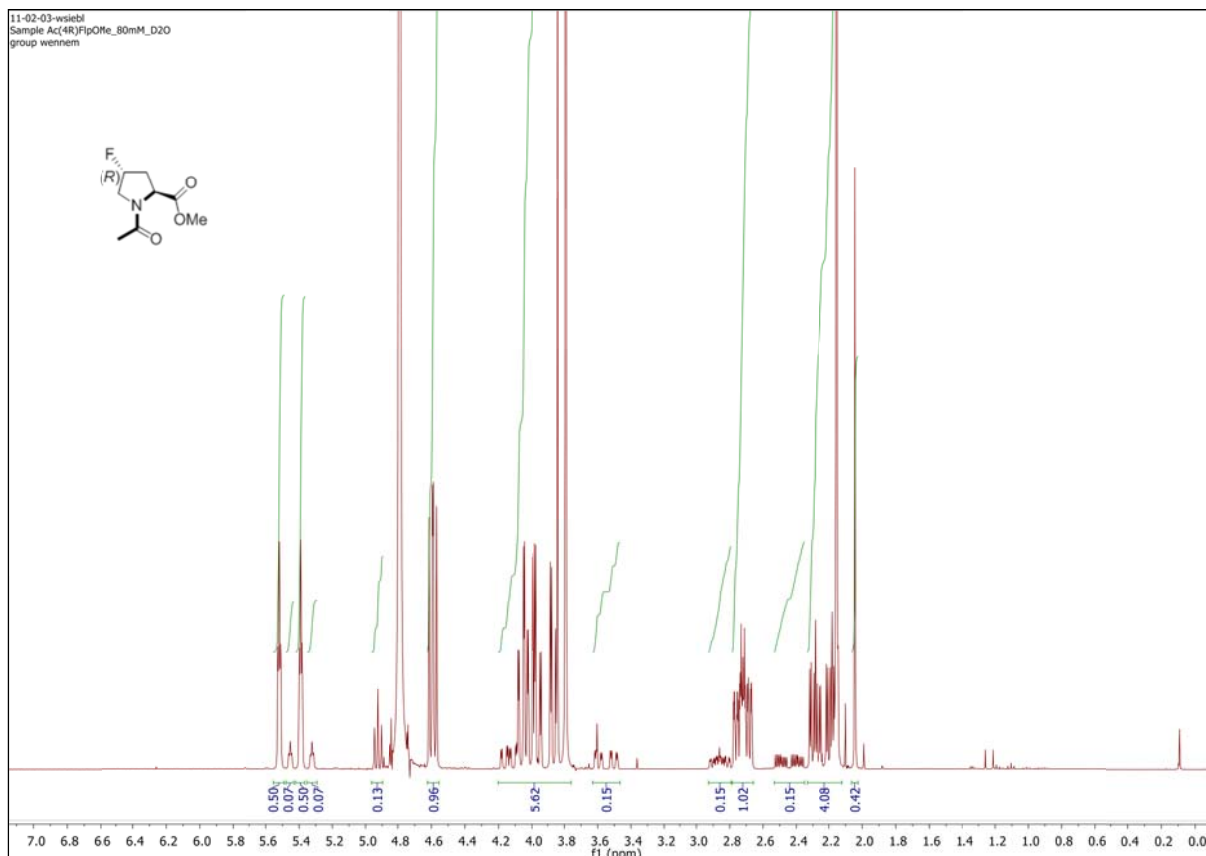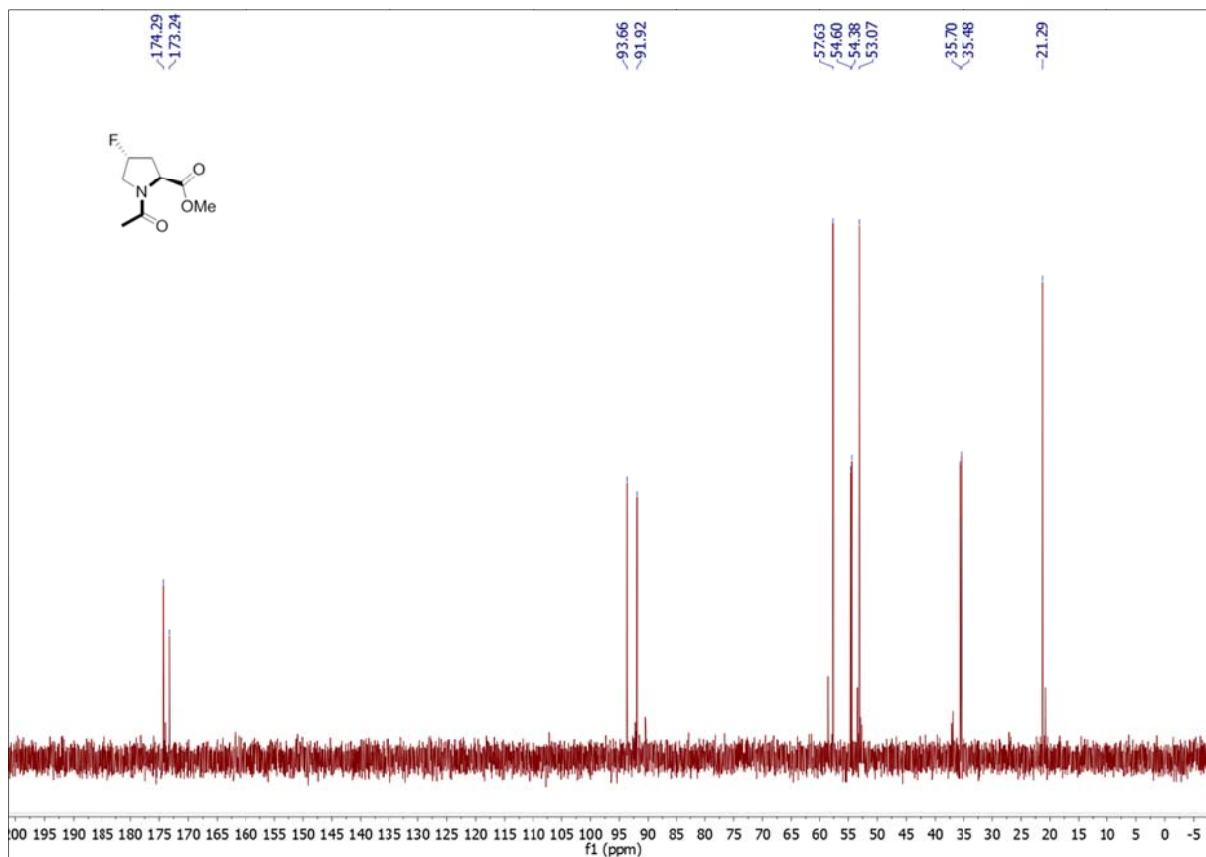

# Ac-(4R)Flp-OMe (2R-OMe) 80mM in CDCl<sub>3</sub>

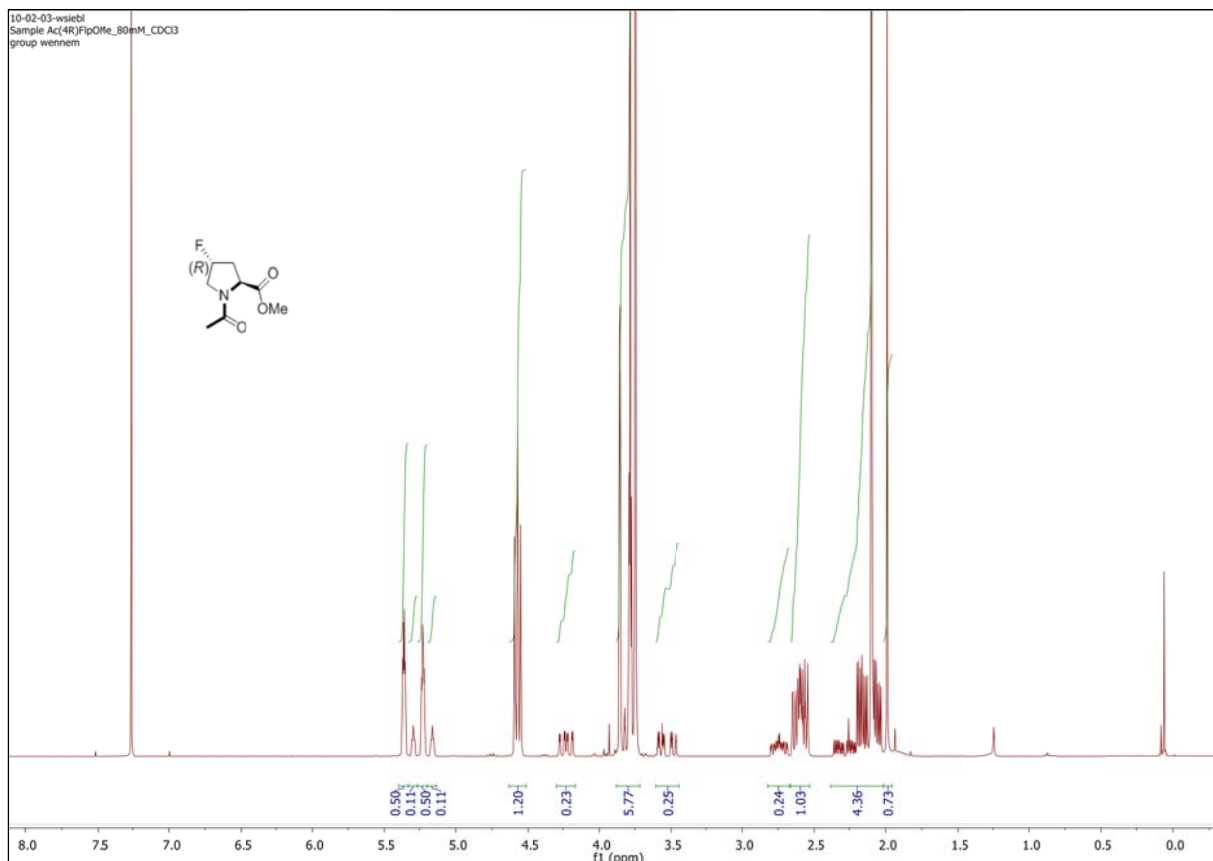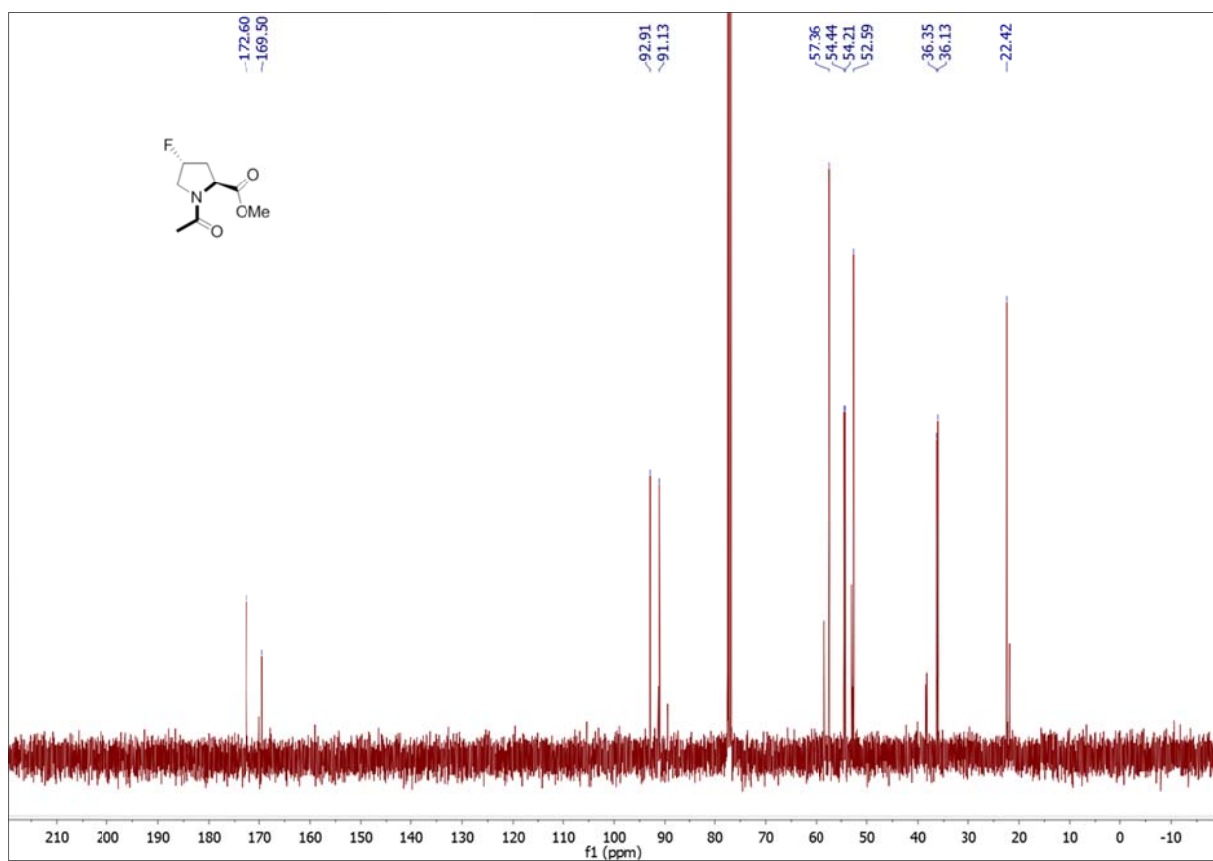

### 6.10. Ac-(4*R*)Flp-NMe<sub>2</sub> (2*R*-NMe<sub>2</sub>) 80mM in D<sub>2</sub>O

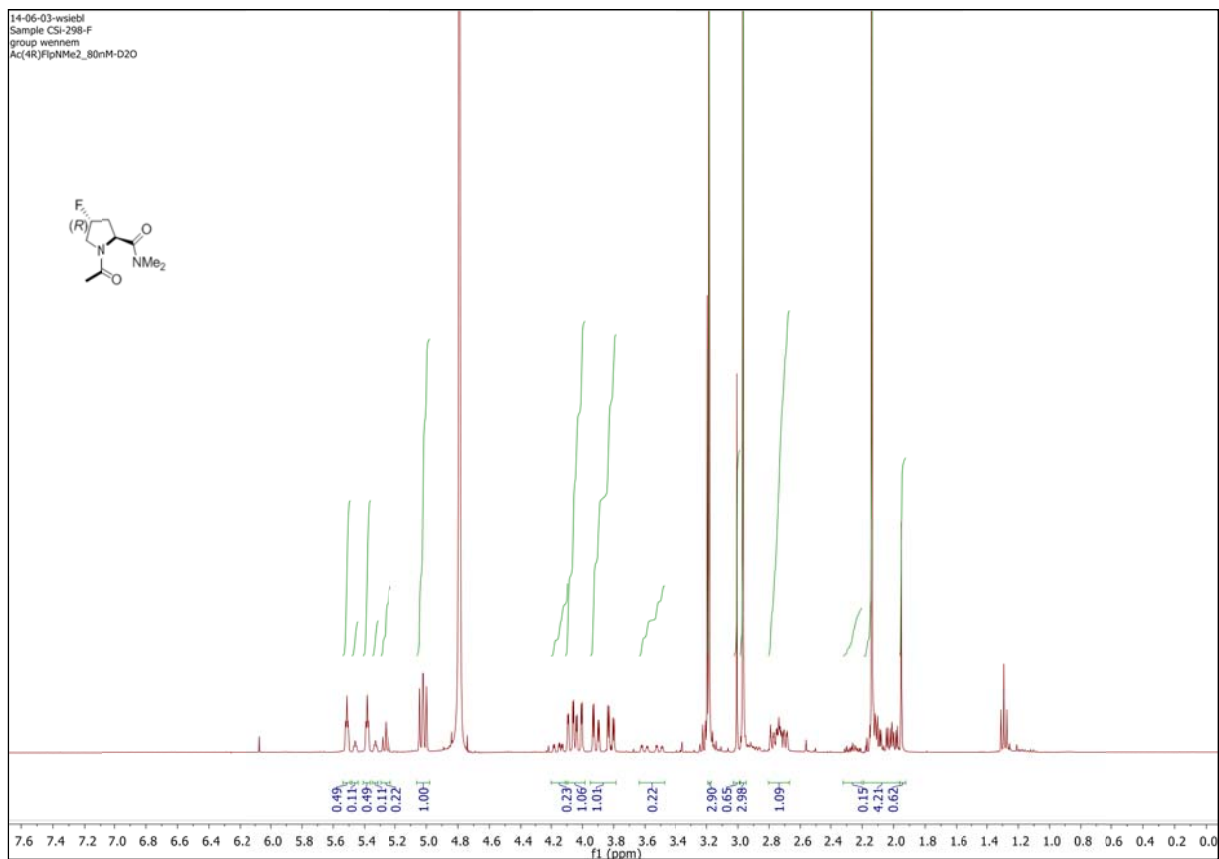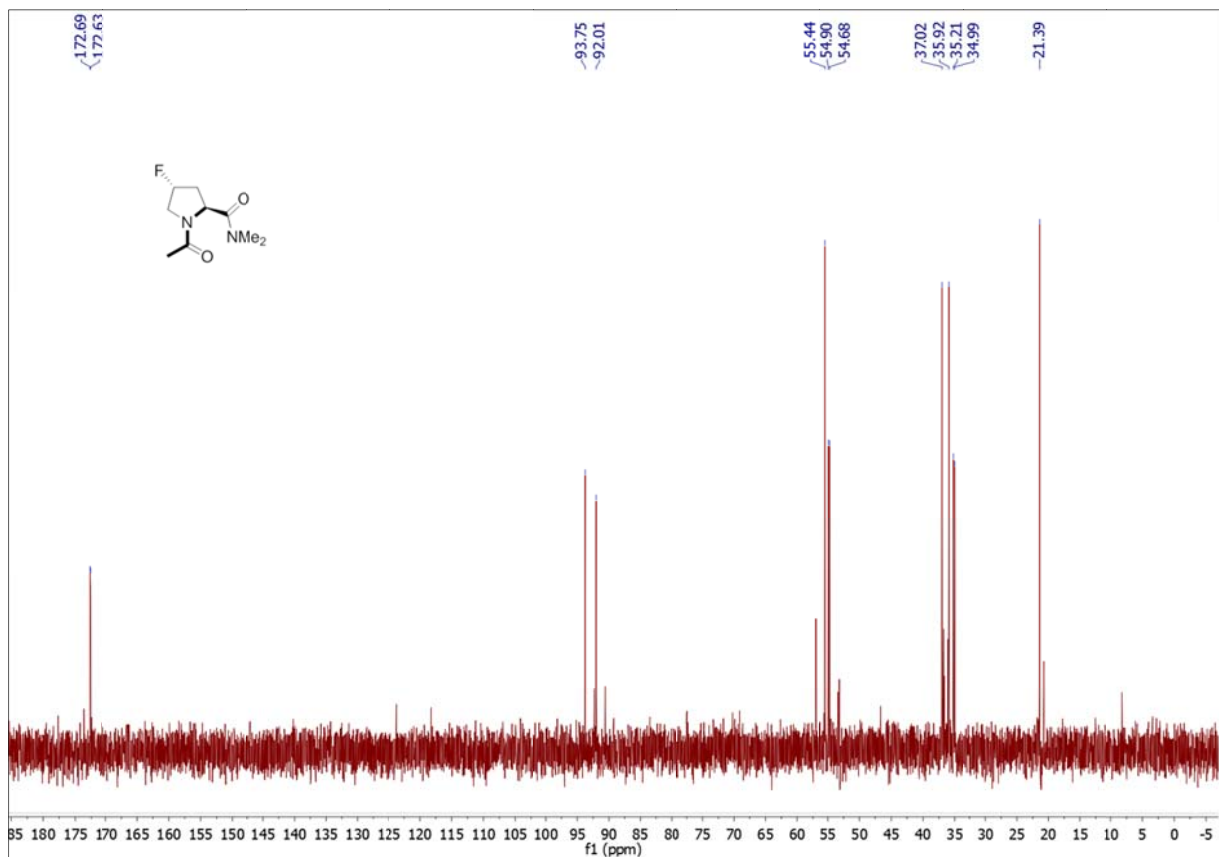

### 6.11. Ac-(4*R*)Flp-NMe<sub>2</sub> (2*R*-NMe<sub>2</sub>) 80mM in CDCl<sub>3</sub>

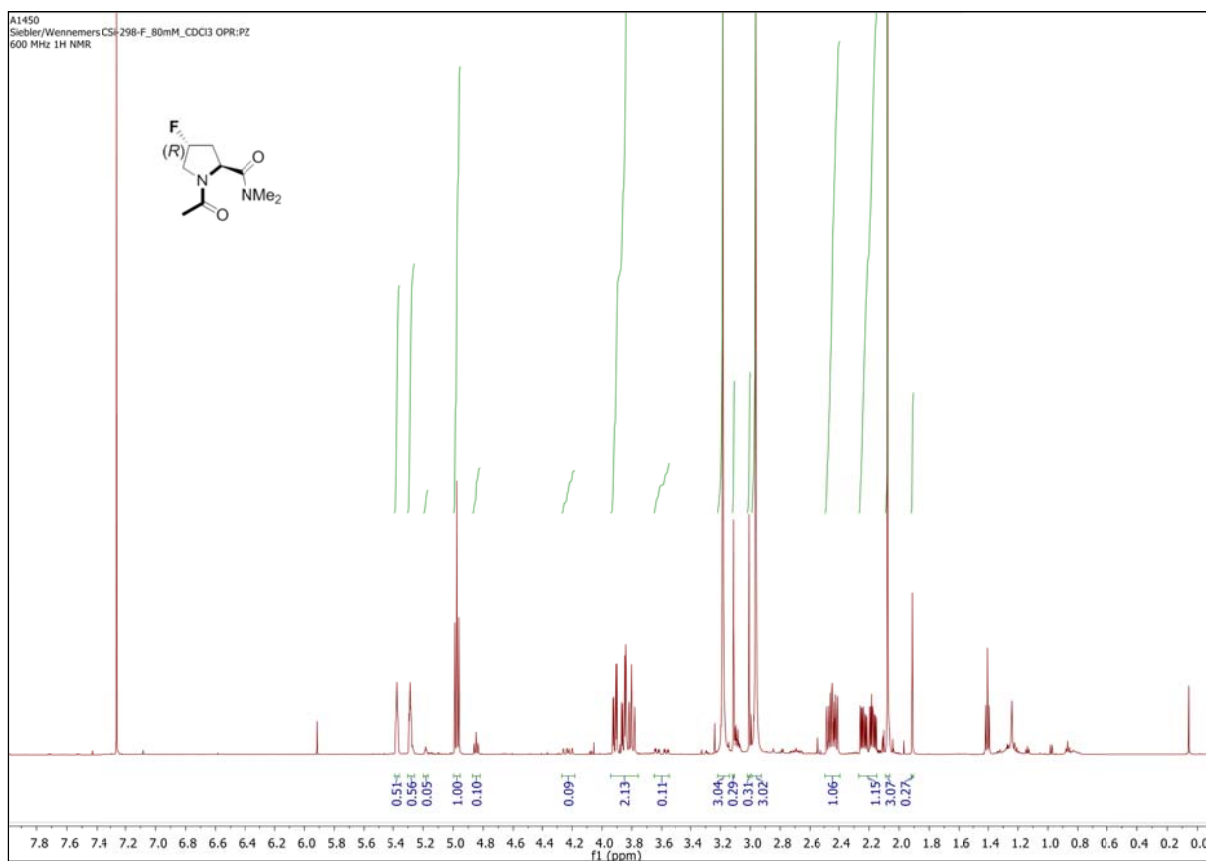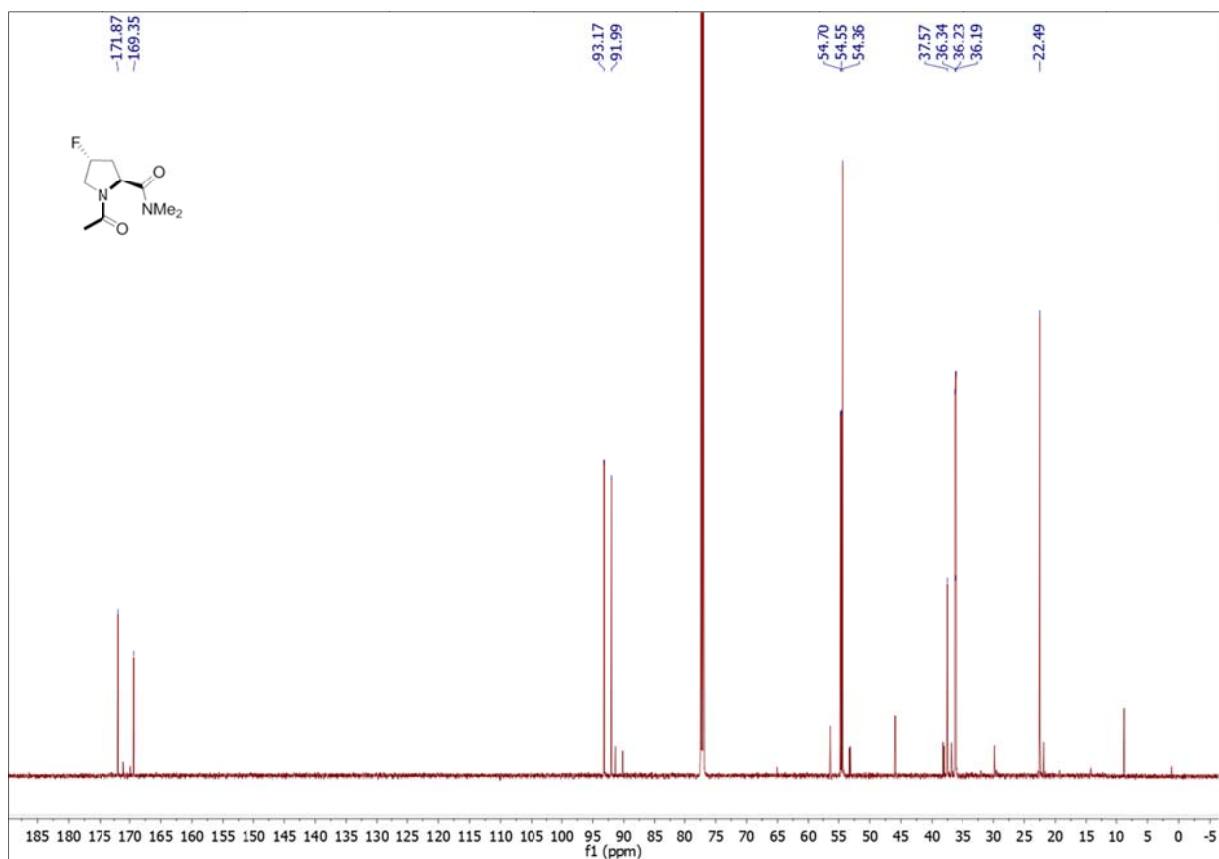



## 6.12. Ac-(4*R*)Azp-NMe<sub>2</sub> (3*R*-NMe<sub>2</sub>) 80mM in D<sub>2</sub>O

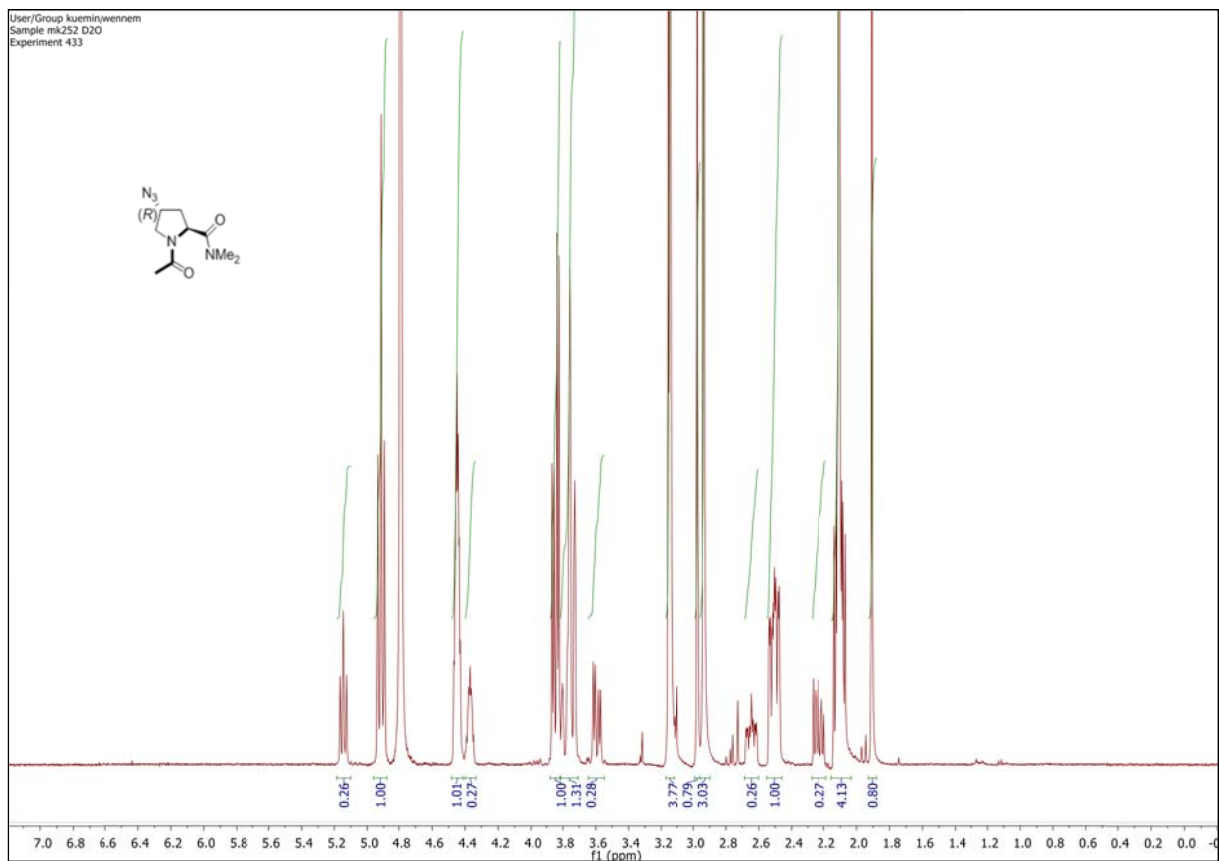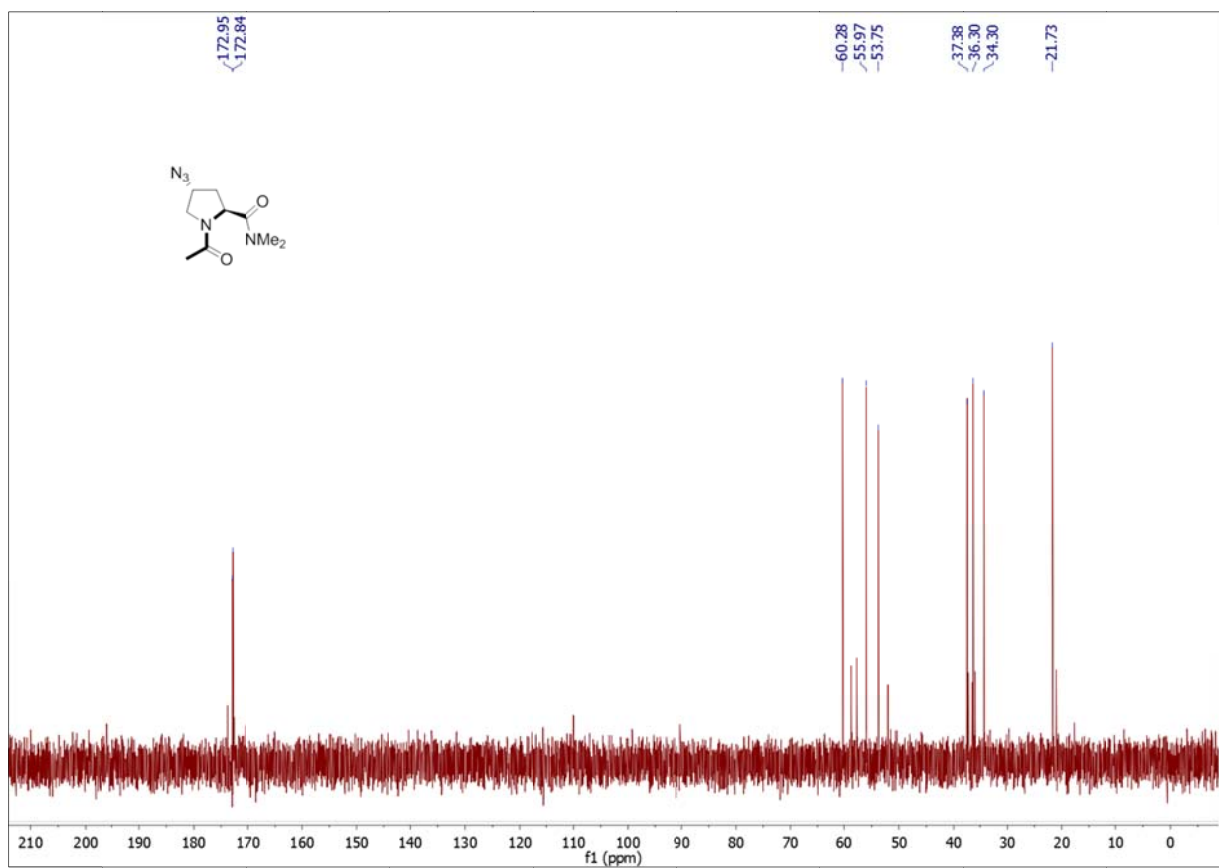

### 6.13. Ac-(4*R*)Azp-NMe<sub>2</sub> (3*R*-NMe<sub>2</sub>) 80mM in CDCl<sub>3</sub>

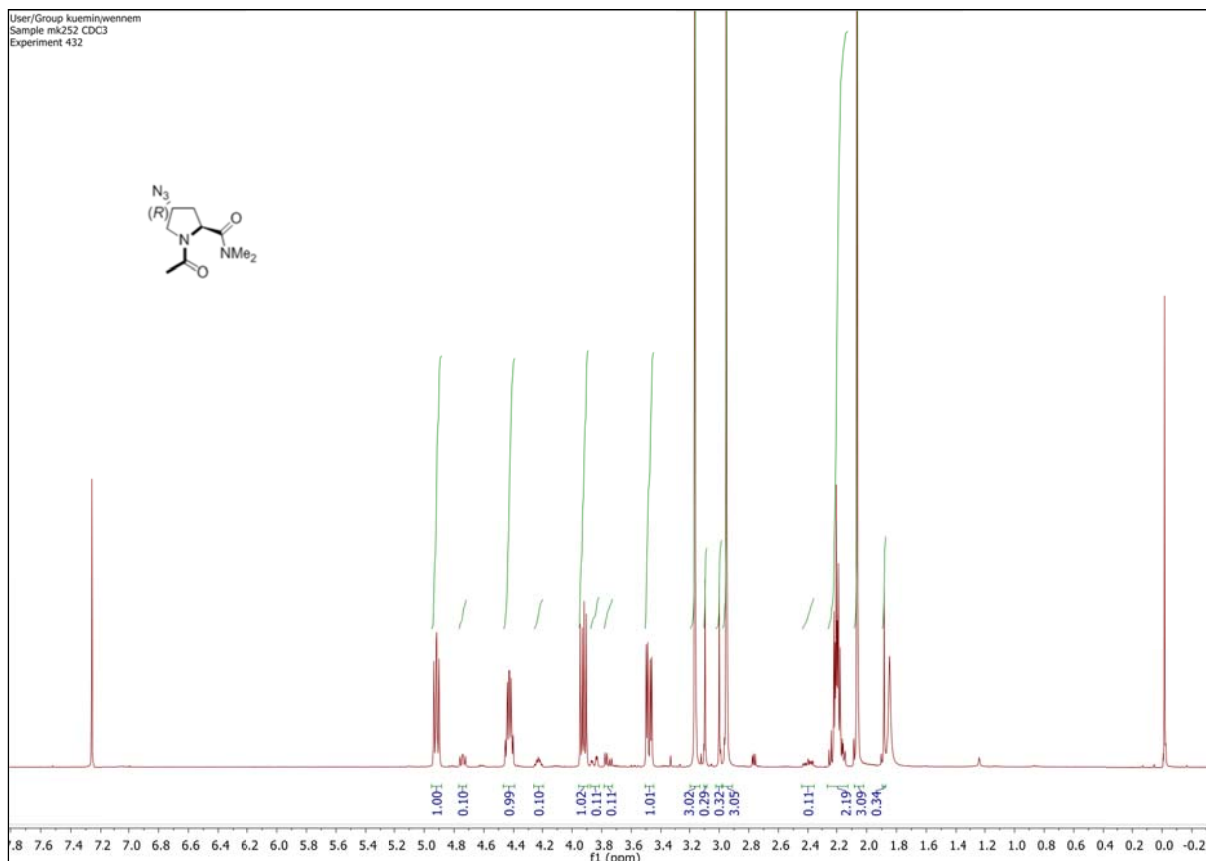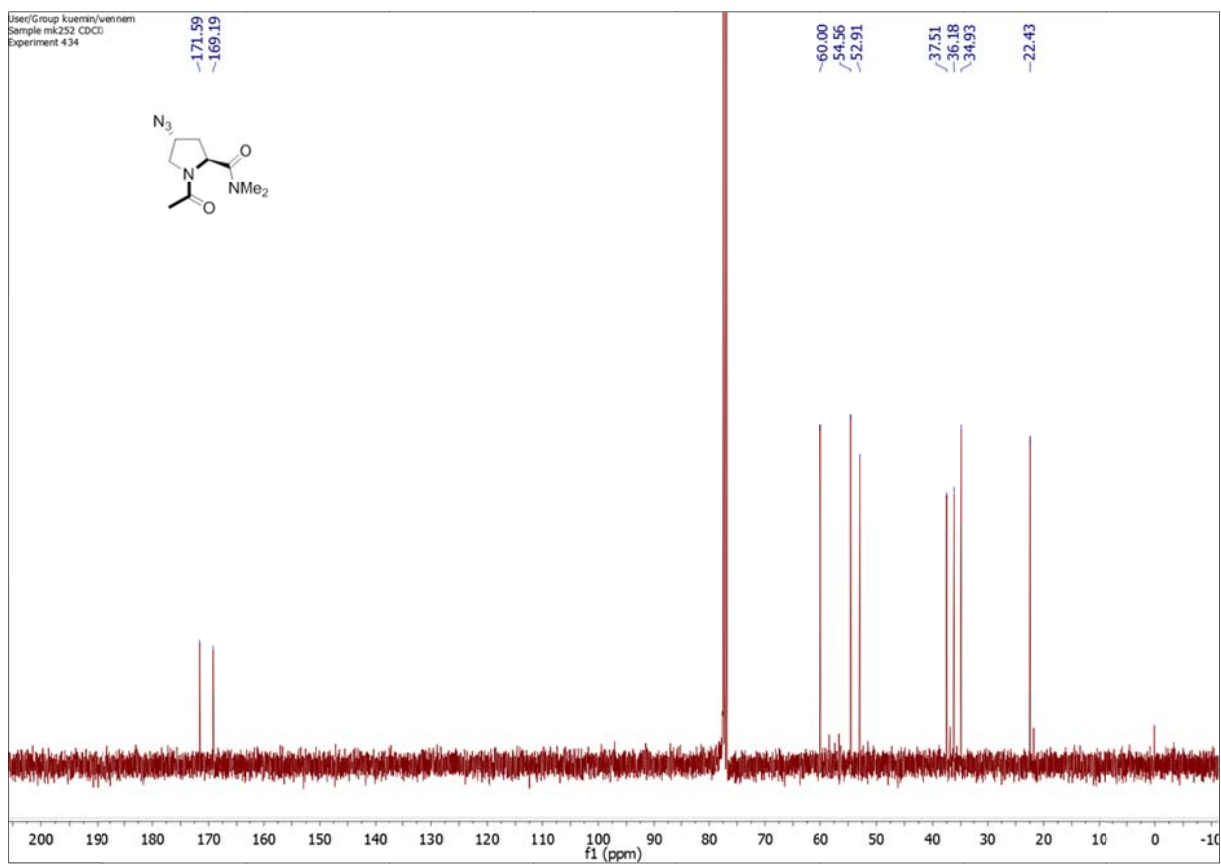

### 6.14. Ac-(4S)Flp-OMe (2S-OMe) 80mM in D<sub>2</sub>O

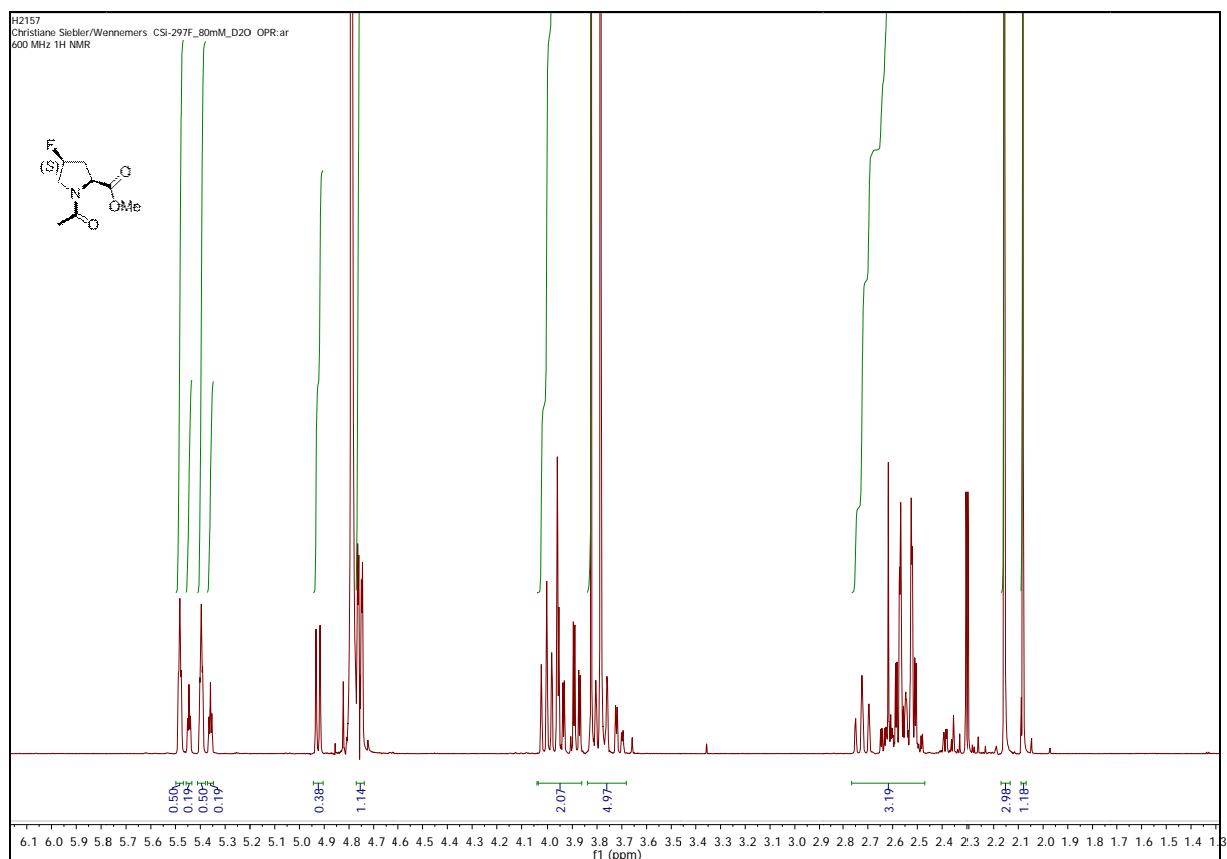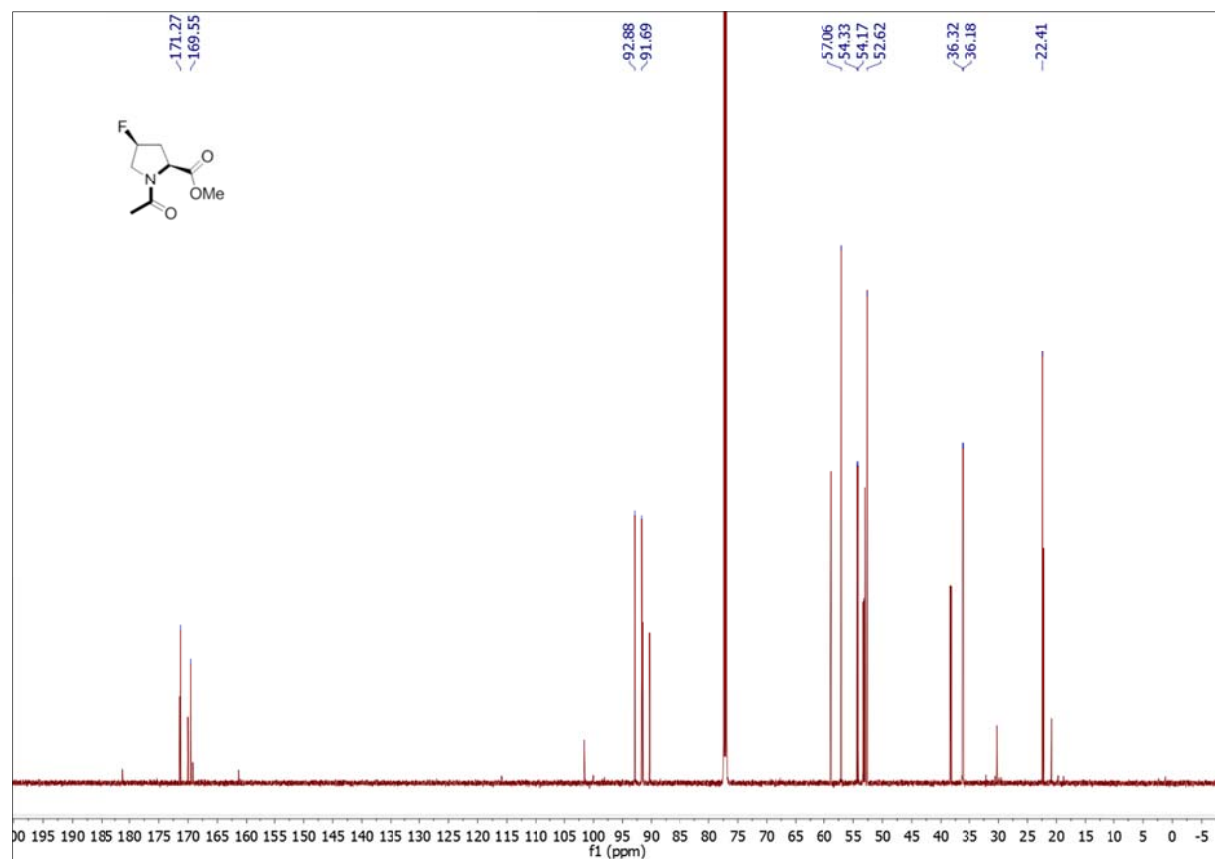

### 6.15. Ac-(4S)Flp-OMe (2S-OMe) 80mM in CDCl<sub>3</sub>

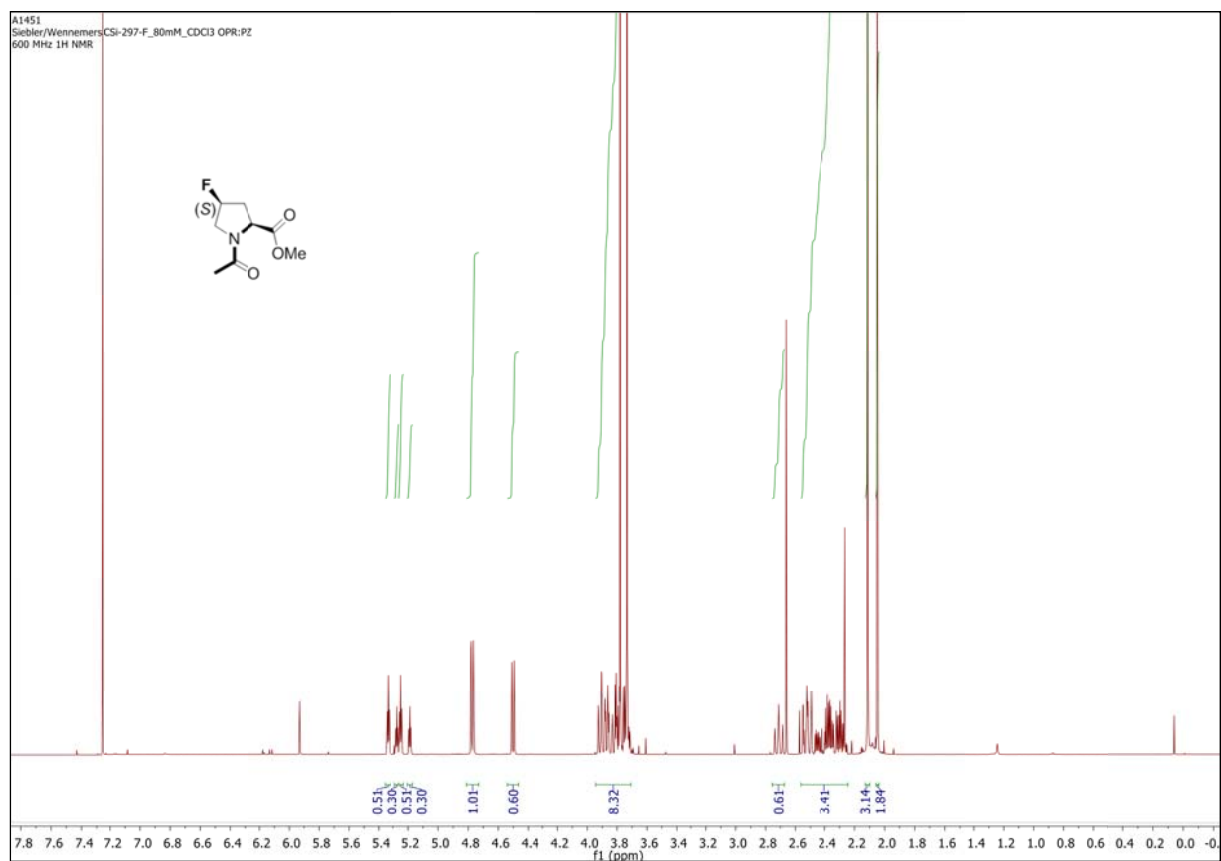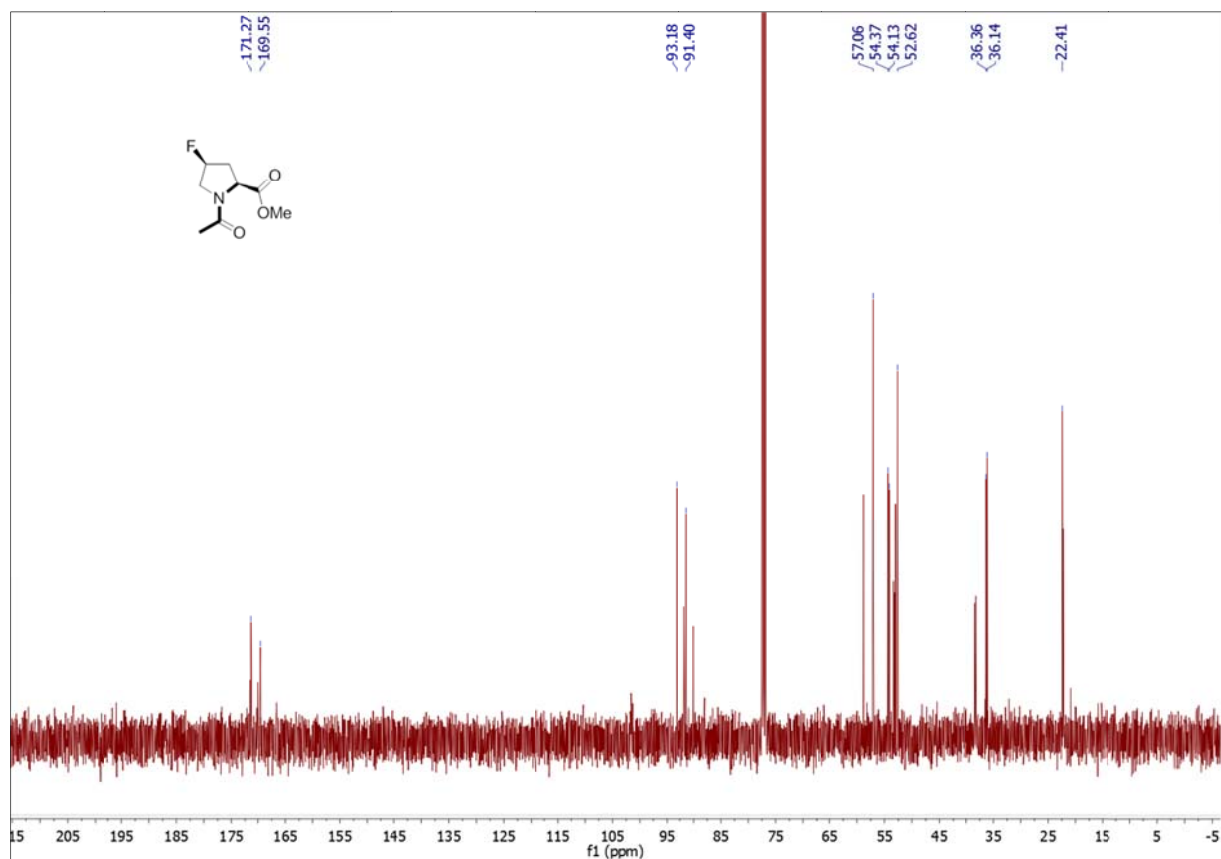

### 6.16. Ac-(4S)Flp-NMe<sub>2</sub> (2S-NMe<sub>2</sub>) 80mM in D<sub>2</sub>O

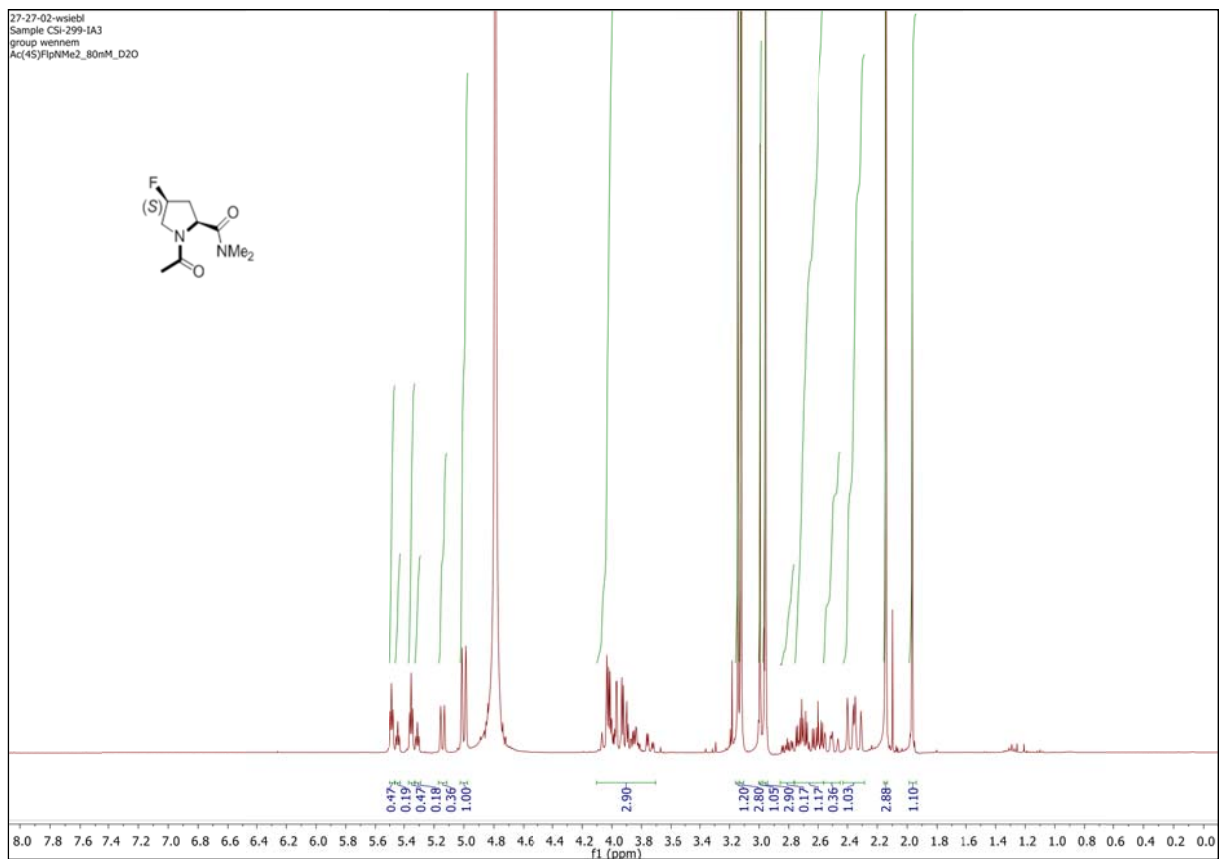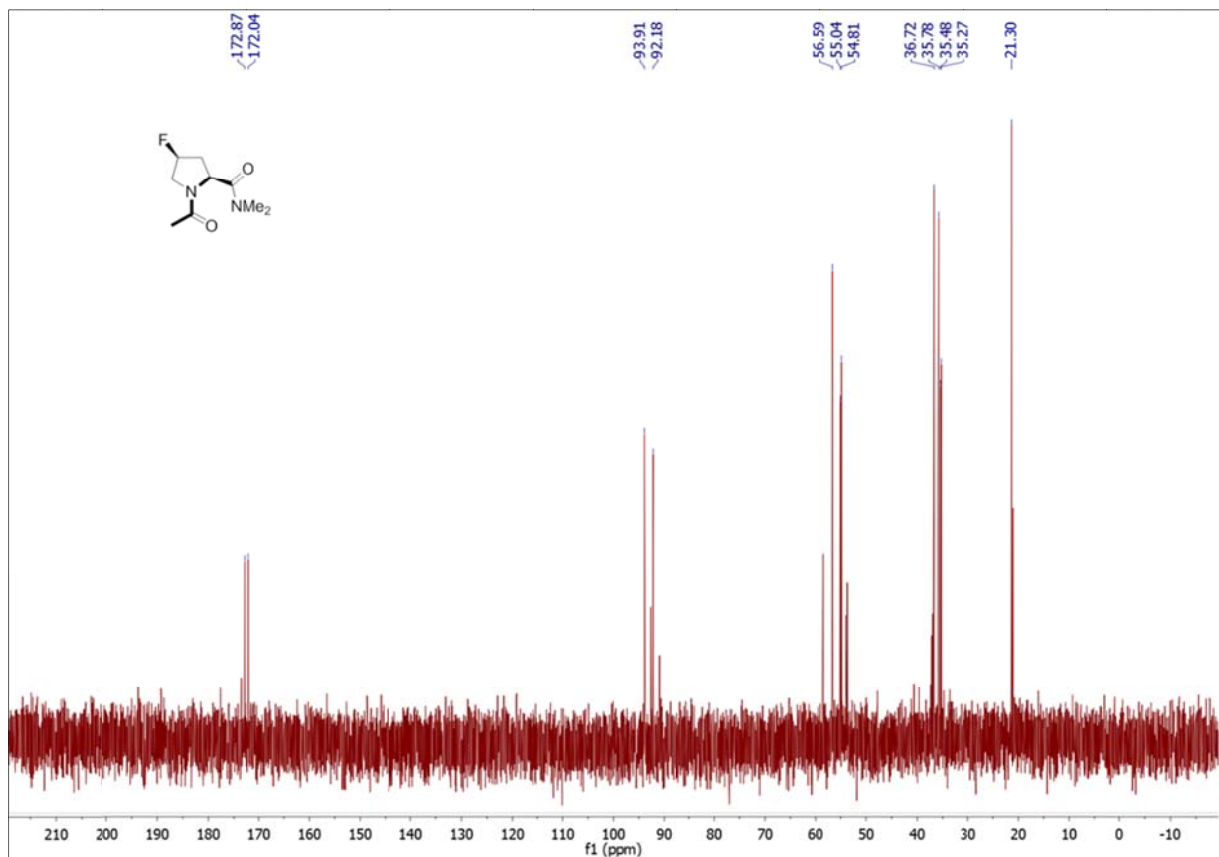

6.17. Ac-(4S)Flp-NMe<sub>2</sub> (2S-NMe<sub>2</sub>) 80mM in CDCl<sub>3</sub>

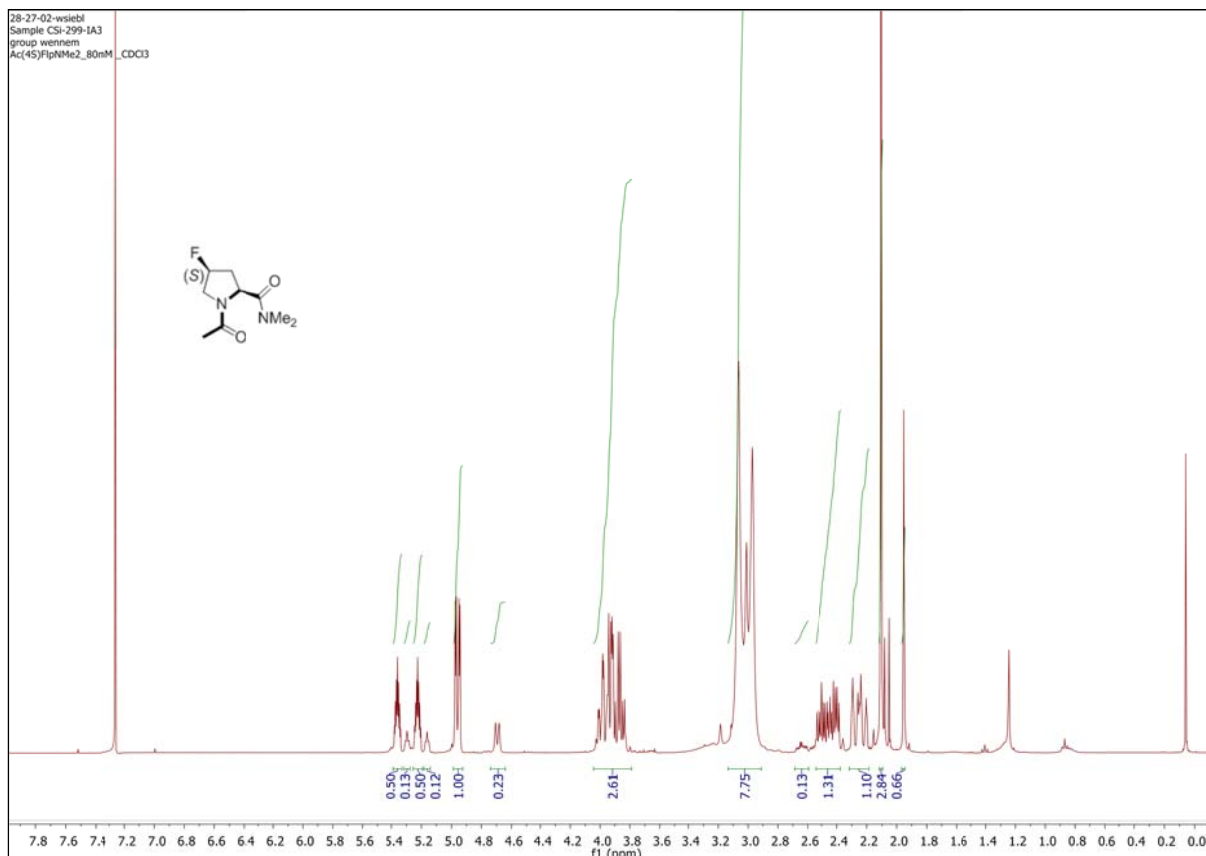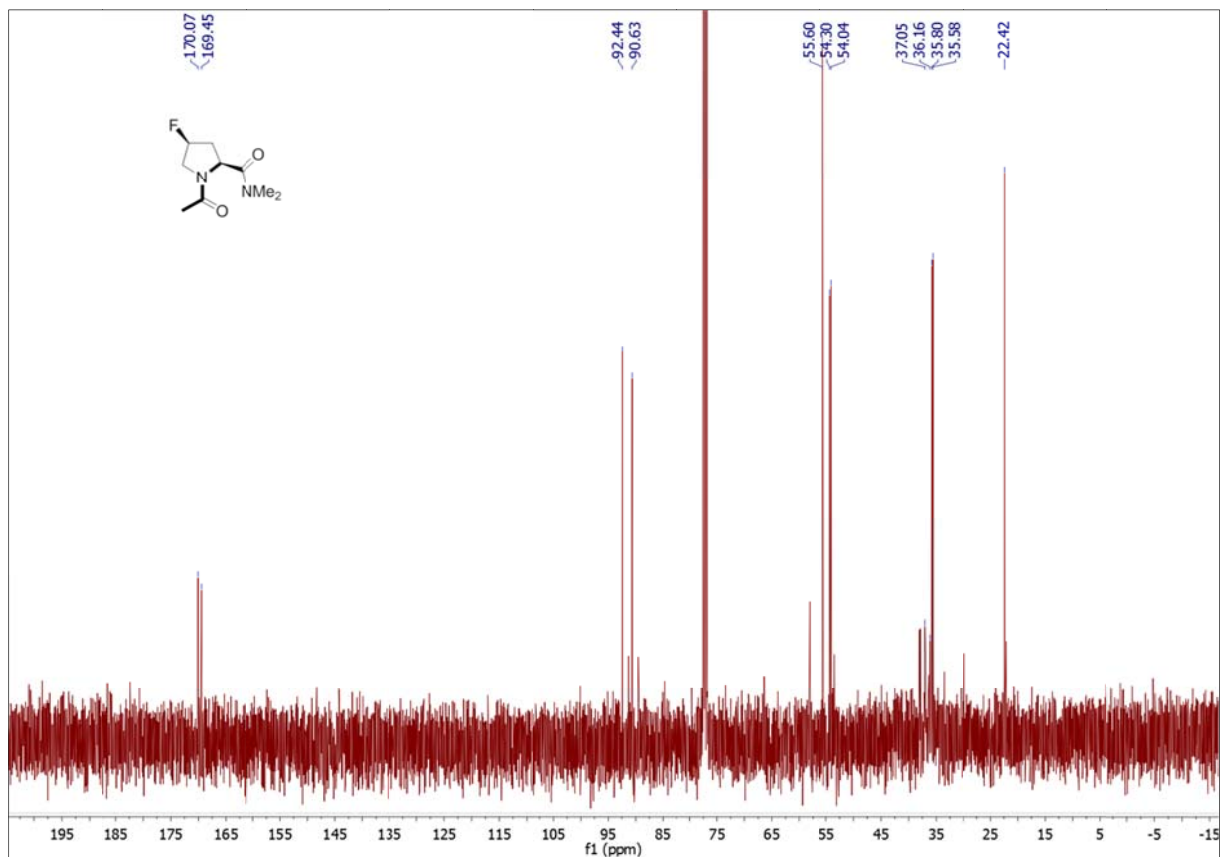

### 6.18. Ac-(4S)Azp-NMe<sub>2</sub> (3S-NMe<sub>2</sub>) 80mM in D<sub>2</sub>O

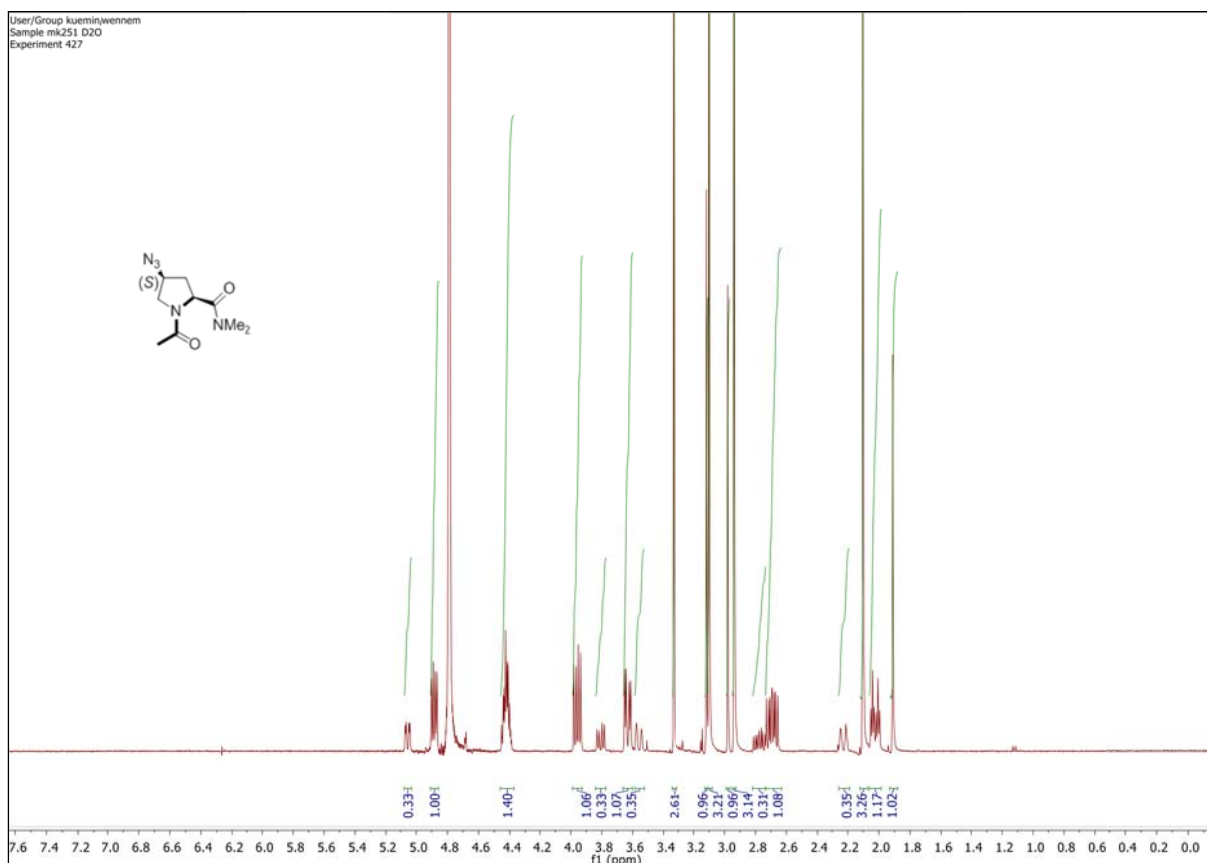

6.19. Ac-(4S)Azp-NMe<sub>2</sub> (3S-NMe<sub>2</sub>) 80mM in CDCl<sub>3</sub>

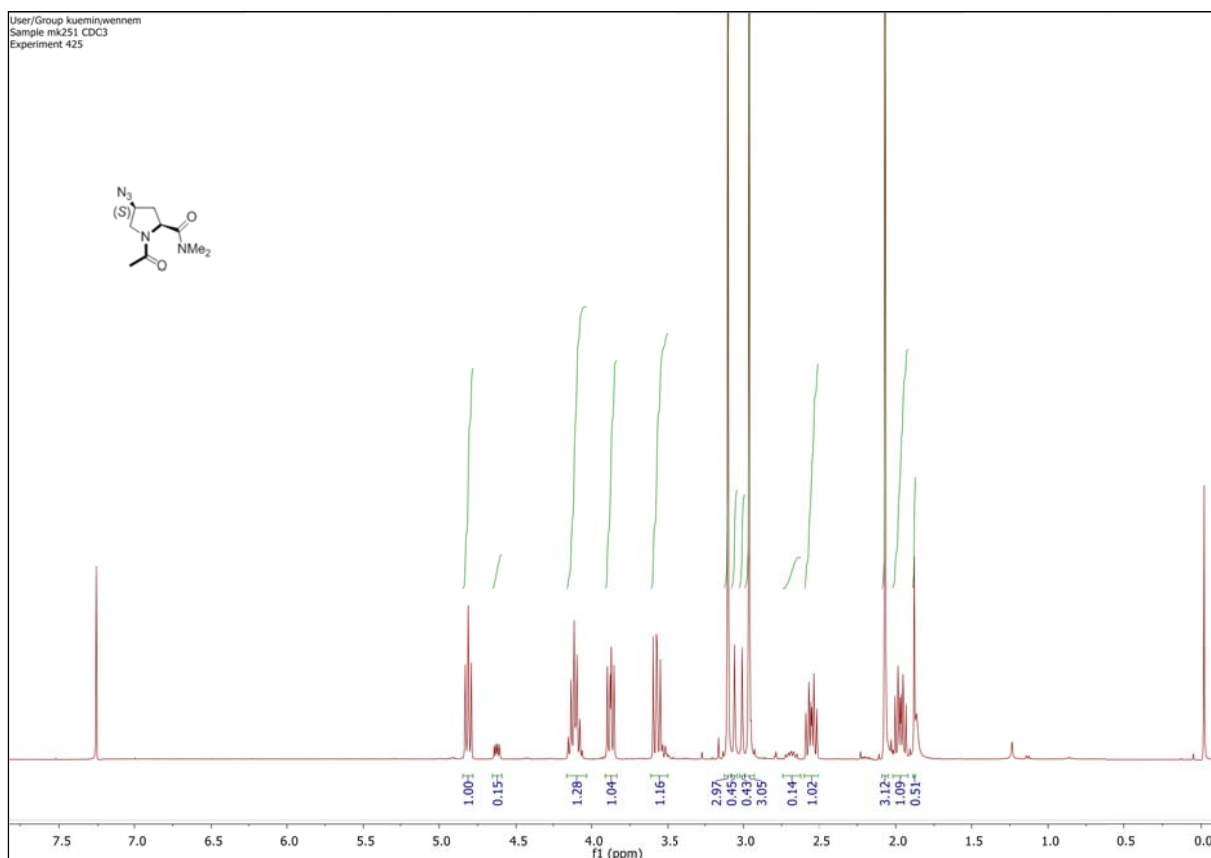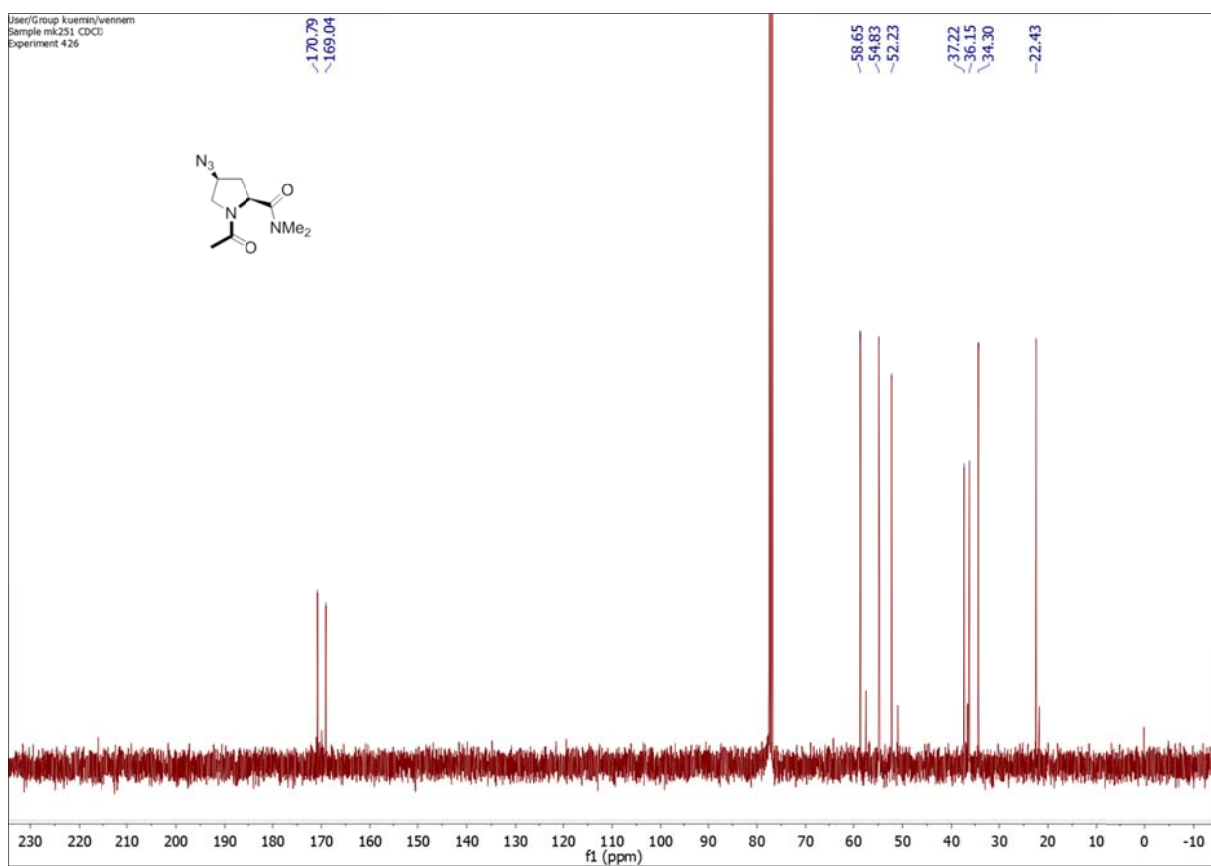







## 7. References

1. L. E. Bretscher, C. L. Jenkins, K. M. Taylor, M. L. DeRider and R. T. Raines, *J. Am. Chem. Soc.* 2001, **123**, 777.
2. R. W. Newberry, B. VanVeller, I. A. Guzei and R. T. Raines, *J. Am. Chem. Soc.* 2013, **135**, 7843.
3. (a) P. Krattiger, R. Kovàsy, J. D. Revell, S. Ivan and H. Wennemers, *Org. Lett.* 2005, **7**, 1101. (b) J. D. Revell, H. Wennemers, *Tetrahedron* 2007, **63**, 8420.
4. C. Adamo, G. E. Scuseria and V. Barone, *J. Chem. Phys.*, 1999, **111**, 2889.
5. S. Grimme, J. Antony, S. Ehrlich and H. Krieg, *J. Chem. Phys.*, 2010, **132**, 154104.
6. F. Weigend and R. Ahlrichs, *Phys. Chem. Chem. Phys.*, 2005, **7**, 3297.
7. A. Klamt and G. Schuurmann, *J. Chem. Soc., Perk. T. 2*, 1993, 799.
8. (a) TURBOMOLE V6.3 2011, a development of University of Karlsruhe and Forschungszentrum Karlsruhe GmbH, 1989-2007, TURBOMOLE GmbH, since 2007, available from <http://www.turbomole.com>; (b) TURBOMOLE V6.6 2014, a development of University of Karlsruhe and Forschungszentrum Karlsruhe GmbH, 1989-2007, TURBOMOLE GmbH, since 2007; available from <http://www.turbomole.com>
